# Supplementary material for: Longitudinal blood cell transcriptomic profiling and in vitro temporal proteomics provides novel insights into metabolic reprogramming and host-immune responses against Crimean-Congo Hemorrhagic Fever Virus
Source: Research Square preprint supplement (doi:10.21203/rs.3.rs-465746/v1), 2021-05-06
Supplement: Supplementary file 1 [file 83a088462c6d06300aa8ccee.pdf]

# **Longitudinal blood cell transcriptomic profiling and *in vitro* temporal proteomics provides novel insights into metabolic reprogramming and host-immune responses against Crimean-Congo Hemorrhagic Fever Virus**

Ujjwal Neogi<sup>1,2\*§</sup>, Nazif Elaldi<sup>3,§</sup>, Sofia Appelberg<sup>4</sup>, Anoop T. Ambikan<sup>1</sup>, Emma Kennedy<sup>5,6</sup>, Stuart Dowall<sup>5</sup>, Binnur K. Bagci<sup>7</sup>, Soham Gupta<sup>1</sup>, Jimmy E. Rodriguez<sup>8</sup>, Sara Svensson-Akusjärvi<sup>1</sup>, Vanessa M. Monteil<sup>1</sup>, Ákos Végvári<sup>8</sup>, Akhil C. Banerjee<sup>9</sup>, Friedemann Weber<sup>10</sup>, Roger Hewson<sup>5,6,11</sup>, Ali Mirazimi<sup>1,3,12\*</sup>

<sup>1</sup>Division of Clinical Microbiology, Department of Laboratory Medicine, Karolinska Institute, ANA Futura, Campus Flemingsberg, Stockholm, Sweden.

<sup>2</sup>Manipal Institute of Virology (MIV), Manipal Academy of Higher Education, Manipal, Karnataka, India.

<sup>3</sup>Department of Infectious Diseases and Clinical Microbiology, Medical Faculty, Cumhuriyet University, Sivas, Turkey

<sup>4</sup>Public Health Agency of Sweden, Solna, Sweden

<sup>5</sup>Public Health England, Porton Down, Salisbury, Wiltshire SP4 0JG, England.

<sup>6</sup>Oxford Brookes University, Headington Road, Oxford OX3 0BP

<sup>7</sup>Department of Nutrition and Dietetics, Faculty of Health Sciences, Sivas Cumhuriyet University, Sivas, Turkey

<sup>8</sup>Division of Chemistry I, Department of Medical Biochemistry and Biophysics, Karolinska Institutet, Stockholm, Sweden

<sup>9</sup>Institute of Advanced Virology, Trivandrum, India

<sup>10</sup>Institute for Virology, FB10-Veterinary Medicine, Justus-Liebig University, Giessen, Germany

<sup>11</sup>Faculty of Infectious and Tropical Diseases, London School of Hygiene and Tropical Medicine, Keppel Street, London, WC1E 7HT

<sup>12</sup>National Veterinary Institute, Uppsala, Sweden

Running Head: Cellular response to CCHFV

§Equal contribution

\*Address correspondence to Ali Mirazimi, [ali.mirazimi@folkhalsomyndigheten.se](mailto:ali.mirazimi@folkhalsomyndigheten.se), and Ujjwal Neogi [ujjwal.neogi@ki.se](mailto:ujjwal.neogi@ki.se)

**Supplementary Table S1.** The CCHF patient characteristics.

| PID                                                                                                                                            | Age | Gender | The date of symptoms onset | The date of hospitalization | Time to hospitalization (days) | The date of the first sampling | The date of the second sampling | SGS score | Severity group* | RT-PCR   | Anti-CCHF V IgM | Outcome  |
|------------------------------------------------------------------------------------------------------------------------------------------------|-----|--------|----------------------------|-----------------------------|--------------------------------|--------------------------------|---------------------------------|-----------|-----------------|----------|-----------------|----------|
| P01                                                                                                                                            | 33  | Female | 30 May 2017                | 03 June 2017                | 4                              | 03 June 2017                   | 05 July 2018                    | 5         | 1               | positive | ND              | Survived |
| P02                                                                                                                                            | 18  | Male   | 06 June 2017               | 12 June 2017                | 6                              | 12 June 2017                   | ND                              | 7         | 2               | positive | positive        | Survived |
| P03                                                                                                                                            | 45  | Male   | 12 June 2017               | 13 June 2017                | 1                              | 14 June 2017                   | 01 July 2018                    | 0         | 1               | positive | ND              | Survived |
| P04                                                                                                                                            | 67  | Male   | 13 June 2017               | 16 June 2017                | 3                              | 17 June 2017                   | 05 July 2018                    | 8         | 2               | positive | ND              | Survived |
| P05                                                                                                                                            | 48  | Male   | 12 June 2017               | 18 June 2017                | 6                              | 19 June 2017                   | 08 July 2018                    | 7         | 2               | positive | ND              | Survived |
| P06                                                                                                                                            | 68  | Male   | 13 June 2017               | 19 June 2017                | 6                              | 20 June 2017                   | 05 July 2018                    | 5         | 1               | positive | ND              | Survived |
| P07                                                                                                                                            | 77  | Male   | 19 June 2017               | 22 June 2017                | 3                              | 23 June 2017                   | 05 July 2018                    | 6         | 2               | positive | ND              | Survived |
| P08                                                                                                                                            | 29  | Female | 20 June 2017               | 24 June 2017                | 4                              | 25 June 2017                   | 02 July 2018                    | 6         | 2               | positive | ND              | Survived |
| P09                                                                                                                                            | 50  | Female | 20 June 2017               | 25 June 2017                | 5                              | 26 June 2017                   | 06 July 2018                    | 4         | 1               | positive | positive        | Survived |
| P10                                                                                                                                            | 35  | Female | 07 July 2017               | 12 July 2017                | 5                              | 12 July 2017                   | 04 July 2018                    | 3         | 1               | negative | positive        | Survived |
| P11                                                                                                                                            | 64  | Female | 15 July 2017               | 18 July 2017                | 3                              | 19 July 2017                   | ND                              | 10        | 2               | positive | ND              | Survived |
| P12                                                                                                                                            | 57  | Male   | 16 July 2017               | 21 July 2017                | 5                              | 22 July 2017                   | 09 July 2018                    | 9         | 2               | positive | ND              | Survived |
| P13                                                                                                                                            | 79  | Male   | 22 July 2017               | 24 July 2017                | 2                              | 24 July 2017                   | ND                              | 11        | 3               | positive | ND              | Died     |
| P14                                                                                                                                            | 36  | Male   | 01 August 2017             | 06 August 2017              | 5                              | 07 August 2017                 | 04 July 2018                    | 7         | 2               | positive | ND              | Survived |
| P15                                                                                                                                            | 62  | Male   | 15 August 2017             | 20 August 2017              | 5                              | 21 August 2017                 | 06 July 2018                    | 9         | 2               | positive | ND              | Survived |
| P16                                                                                                                                            | 48  | Male   | 05 September 2017          | 07 September 2017           | 2                              | 07 September 2017              | ND                              | 4         | 1               | positive | ND              | Survived |
| P17                                                                                                                                            | 55  | Male   | 12 April 2018              | 17 April 2018               | 5                              | 18 April 2018                  | ND                              | 9         | 2               | positive | ND              | Survived |
| P18                                                                                                                                            | 44  | Female | 23 April 2018              | 27 April 2018               | 4                              | 29 April 2018                  | ND                              | 9         | 2               | positive | ND              | Survived |
| * 1: Low (0-5); 2: Intermediate (6-10); 3: High (11-16)                                                                                        |     |        |                            |                             |                                |                                |                                 |           |                 |          |                 |          |
| ND: not determined; SGS: severity grading system; RT-PCR: real time- polymerase chain reaction; CCHFV: Crimean-Congo haemorrhagic fever virus; |     |        |                            |                             |                                |                                |                                 |           |                 |          |                 |          |

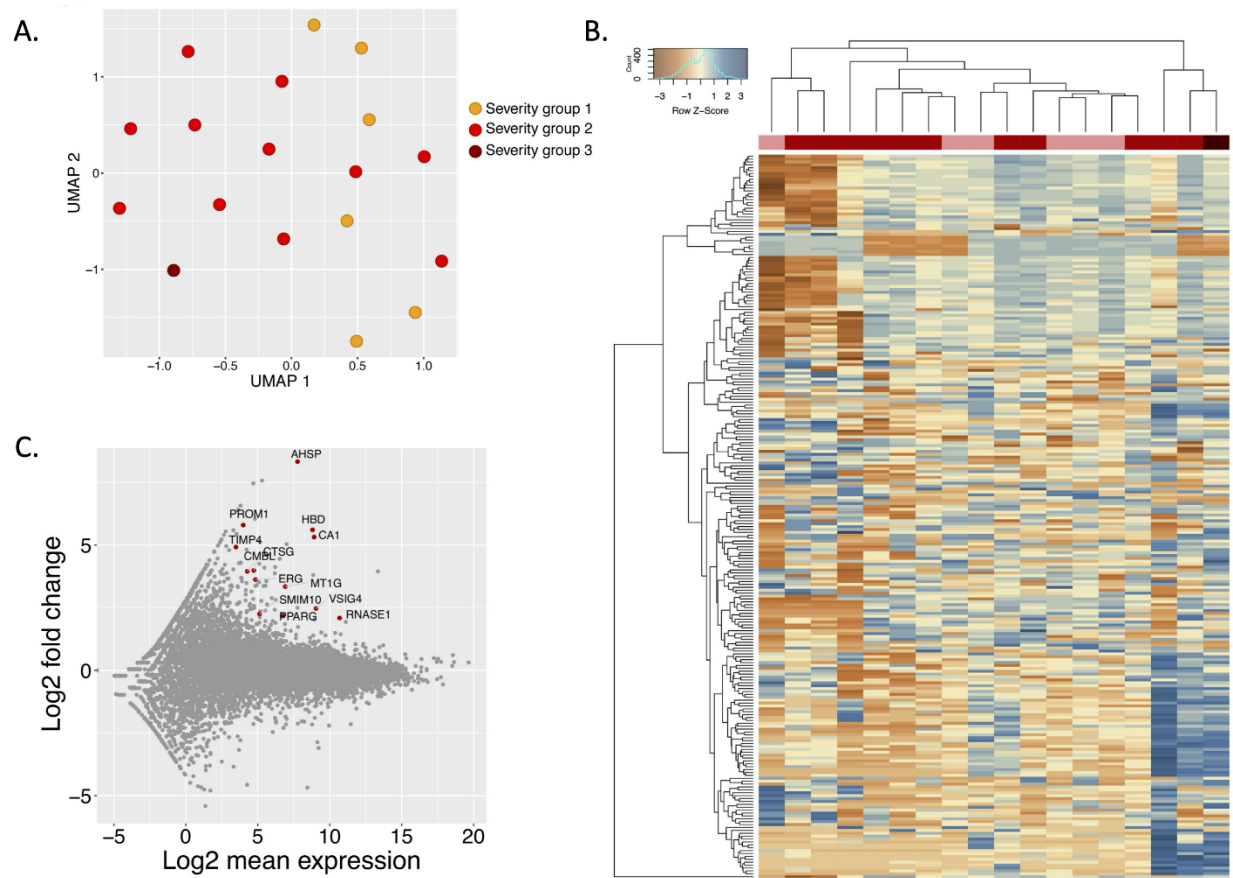

**Supplementary Figure S1: Severity group association with gene expression. (A)**

Sample distribution during the acute phase of infection in different severity groups as reported. (B) The heterogeneous gene-expression profile was further refined by hierarchical clustering analysis of the top 500 high variable genes (C) MA plot of differentially regulated genes during the acute phase between samples of severity group 1 and severity group 2 or 3.

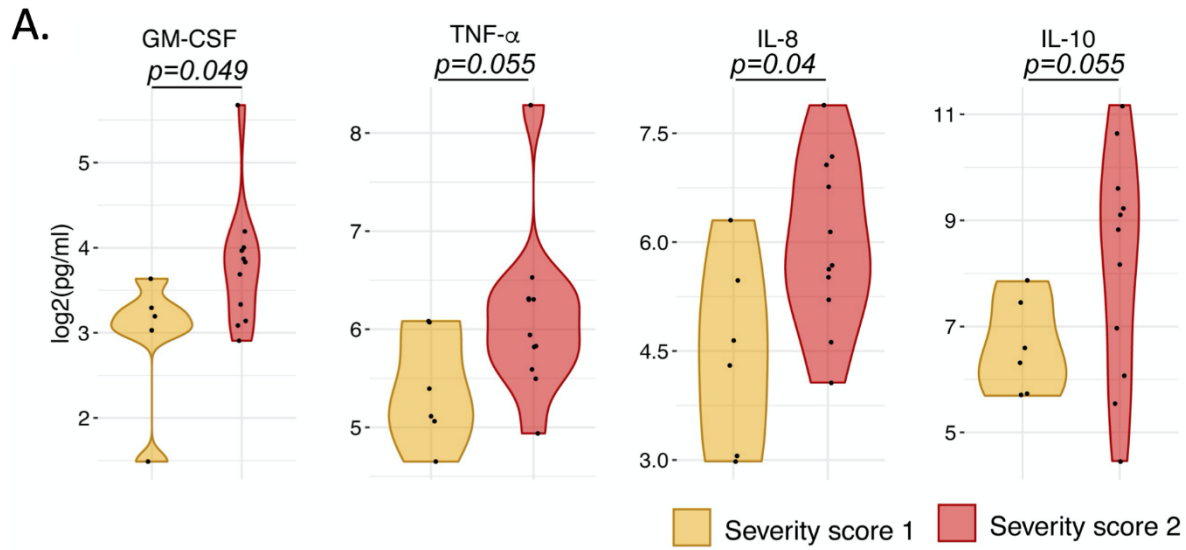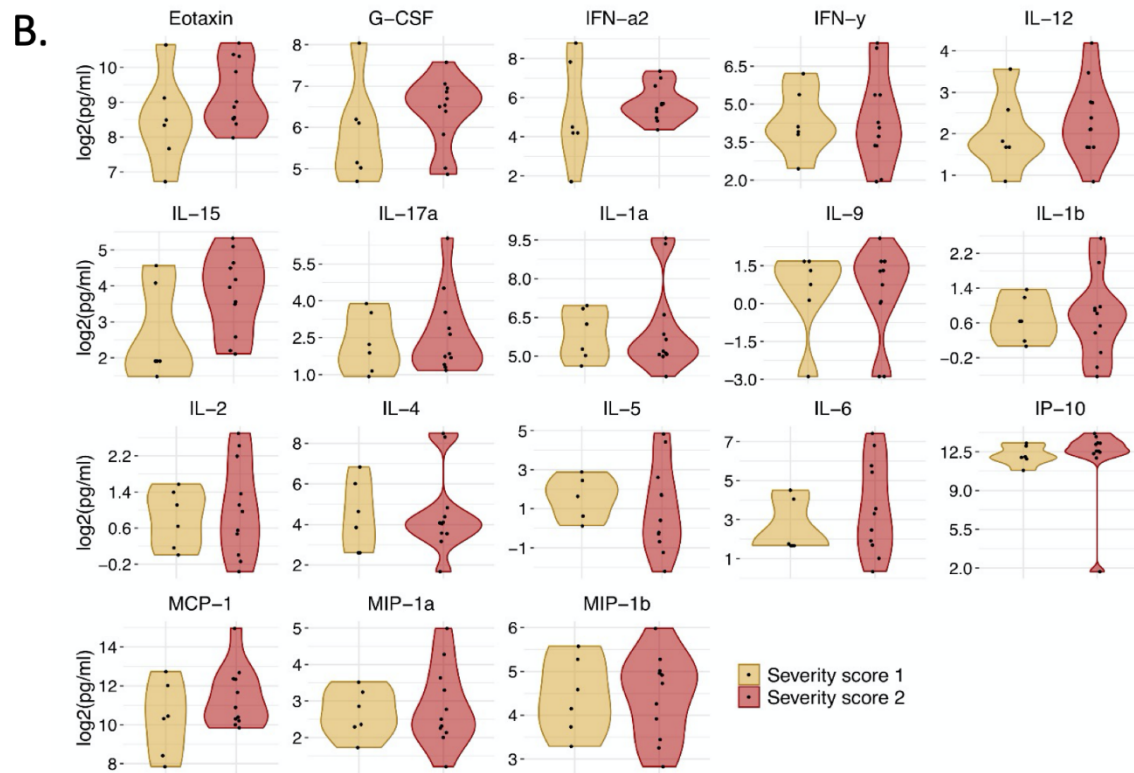

**Supplementary Figure S2. (A)** Violin plot of significantly changed proteins as determined from ELISA assays. **(B)** The levels of all of the rest 18 soluble marker.

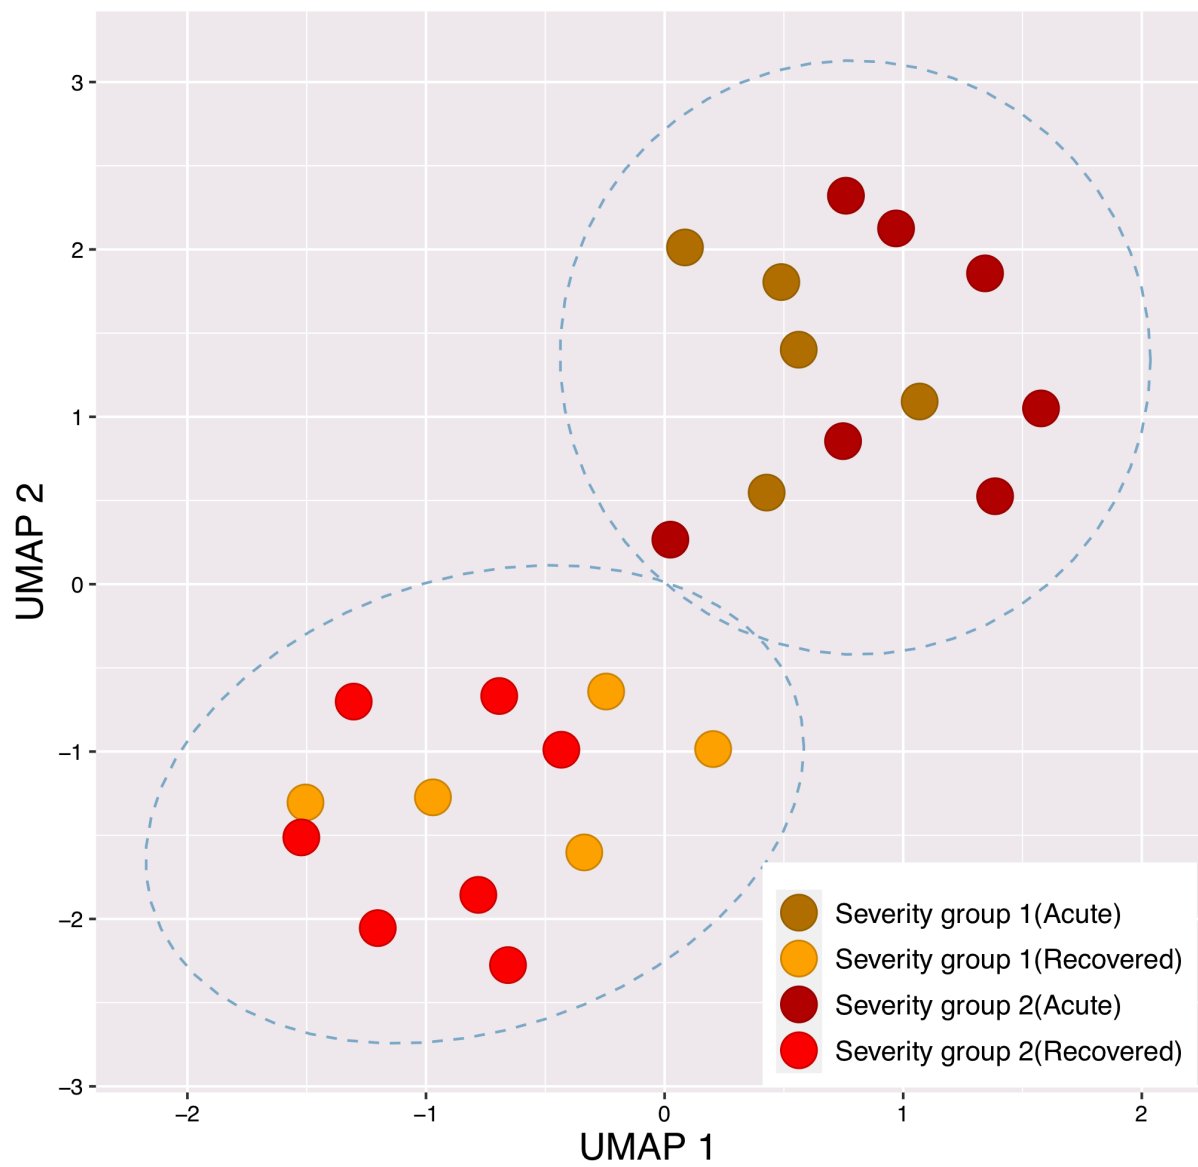

**Supplementary Figure S3:** UMAP clustering of the caute phase and recovered phase samples.

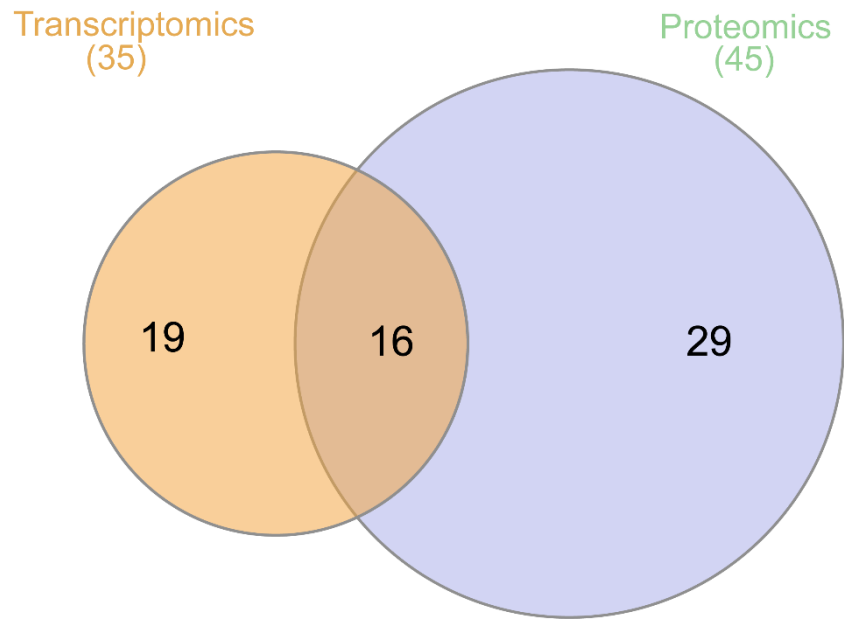

N-Glycan biosynthesis  
Citrate cycle (TCA cycle)  
Amino sugar and nucleotide sugar metabolism  
FoxO signaling pathway  
HIF-1 signaling pathway  
One carbon pool by folate  
Terpenoid backbone biosynthesis  
Propanoate metabolism  
AMPK signaling pathway  
Fc gamma R-mediated phagocytosis  
Pyrimidine metabolism  
Pyruvate metabolism  
Thermogenesis  
Glycine, serine, and threonine metabolism  
Glycolysis / Gluconeogenesis  
Purine metabolism

**Supplementary Figure S4:** Overlap of the pathways identified between patients based transcriptomics data and in vitro cellular data.



**Supplemental Table Sx:**

| <b>Name</b>    | <b>Fwd<br/>Sequence (5' to 3')</b> | <b>Rev<br/>Sequence (5' to 3')</b> |
|----------------|------------------------------------|------------------------------------|
| ISG15          | CGCAGATCACCCAGAAGATCG              | TTCGTCGCATTTGTCCACCA               |
| IFIT1          | TCTCAGAGGAGCCTGGCTAA               | TGACATCTCAATTGCTCCAGA              |
| MX1            | CCAGCTGCTGCATCCCACCC               | AGGGGCGCACCTTCTCCTCA               |
| MX2            | CAGAGGCAGCGGAATCGTAA               | TGAAGCTCTAGCTCGGTGTTC              |
| $\beta$ -actin | AAAGCCTGCCGGTGACTAAC               | AGGAAAAGCATCACCCGGAG               |
