# Supplementary material for: Longitudinal blood cell transcriptomic profiling and in vitro temporal proteomics provides novel insights into metabolic reprogramming and host-immune responses against Crimean-Congo Hemorrhagic Fever Virus
Source: Research Square preprint supplement (doi:10.21203/rs.3.rs-465746/v1), 2021-05-06
Supplement: Supplementary file 1 [file 1378194d3b806bb5bb5aa957.xlsx]

## Sheet: Recovered-vs-Acute (Overall)
ID	GeneName	BioType	baseMean	log2FoldChange	lfcSE	stat	pvalue	padj	Significance
ENSG00000165949.12	IFI27	protein_coding	14817.9	9.65421	0.490315	19.6898	2.63674e-86	4.49037e-82	Up Regulated in Acute
ENSG00000239264.8	TXNDC5	protein_coding	493.617	5.56663	0.306336	18.1716	8.65843e-74	7.37265e-70	Up Regulated in Acute
ENSG00000254709.6	IGLL5	protein_coding	901.491	4.43842	0.256003	17.3374	2.45765e-67	1.39513e-63	Up Regulated in Acute
ENSG00000118985.14	ELL2	protein_coding	2262.39	3.6419	0.224381	16.2308	3.05259e-59	1.29964e-55	Up Regulated in Acute
ENSG00000165304.7	MELK	protein_coding	179.196	4.41864	0.286886	15.4021	1.58506e-53	5.39872e-50	Up Regulated in Acute
ENSG00000197705.9	KLHL14	protein_coding	784.989	3.91447	0.261842	14.9497	1.56348e-50	4.43768e-47	Up Regulated in Acute
ENSG00000169385.2	RNASE2	protein_coding	4653.45	2.99281	0.202686	14.7657	2.4375e-49	5.93008e-46	Up Regulated in Acute
ENSG00000129538.13	RNASE1	protein_coding	656.946	4.8593	0.331398	14.663	1.11214e-48	2.36747e-45	Up Regulated in Acute
ENSG00000085840.12	ORC1	protein_coding	202.896	3.9835	0.275263	14.4716	1.83144e-47	3.46549e-44	Up Regulated in Acute
ENSG00000151364.15	KCTD14	protein_coding	248.369	7.32503	0.509427	14.379	7.01212e-47	1.19416e-43	Up Regulated in Acute
ENSG00000136010.13	ALDH1L2	protein_coding	199.994	5.29432	0.37278	14.2023	8.86815e-46	1.37295e-42	Up Regulated in Acute
ENSG00000142945.12	KIF2C	protein_coding	354.484	4.37962	0.315923	13.863	1.06208e-43	1.50727e-40	Up Regulated in Acute
ENSG00000131747.14	TOP2A	protein_coding	834.468	3.97597	0.288416	13.7856	3.11303e-43	4.07807e-40	Up Regulated in Acute
ENSG00000122952.16	ZWINT	protein_coding	573.834	3.87921	0.282112	13.7506	5.04994e-43	6.14289e-40	Up Regulated in Acute
ENSG00000117399.13	CDC20	protein_coding	434.207	4.98763	0.369857	13.4853	1.9096e-41	2.16803e-38	Up Regulated in Acute
ENSG00000137807.13	KIF23	protein_coding	253.508	3.81047	0.284247	13.4055	5.61752e-41	5.97915e-38	Up Regulated in Acute
ENSG00000131462.7	TUBG1	protein_coding	347.63	2.37227	0.177373	13.3745	8.52536e-41	8.54041e-38	Up Regulated in Acute
ENSG00000179639.10	FCER1A	protein_coding	384.46	-4.90418	0.374995	-13.078	4.39893e-39	4.16187e-36	Down Regulated in Acute
ENSG00000183049.12	CAMK1D	protein_coding	731.631	-1.45818	0.113952	-12.7964	1.71712e-37	1.53908e-34	Down Regulated in Acute
ENSG00000169679.14	BUB1	protein_coding	759.566	4.49156	0.351226	12.7882	1.90793e-37	1.6246e-34	Up Regulated in Acute
ENSG00000184979.9	USP18	protein_coding	823.013	4.99424	0.390666	12.7839	2.01666e-37	1.63541e-34	Up Regulated in Acute
ENSG00000237649.7	KIFC1	protein_coding	347.656	3.96216	0.314789	12.5867	2.49799e-36	1.93367e-33	Up Regulated in Acute
ENSG00000154920.14	EME1	protein_coding	113.442	3.54712	0.285688	12.416	2.13873e-35	1.58359e-32	Up Regulated in Acute
ENSG00000123485.11	HJURP	protein_coding	332.622	4.65096	0.375765	12.3773	3.46777e-35	2.46067e-32	Up Regulated in Acute
ENSG00000072571.19	HMMR	protein_coding	211.386	4.52106	0.366578	12.3331	6.0056e-35	4.09102e-32	Up Regulated in Acute
ENSG00000011426.10	ANLN	protein_coding	124.849	4.14466	0.337203	12.2913	1.00905e-34	6.60926e-32	Up Regulated in Acute
ENSG00000092853.13	CLSPN	protein_coding	191.848	3.82381	0.31426	12.1677	4.62151e-34	2.91498e-31	Up Regulated in Acute
ENSG00000123473.15	STIL	protein_coding	184.745	3.61575	0.298732	12.1036	1.01029e-33	6.1447e-31	Up Regulated in Acute
ENSG00000143476.17	DTL	protein_coding	287.607	4.13468	0.342698	12.0651	1.61516e-33	9.48488e-31	Up Regulated in Acute
ENSG00000004468.12	CD38	protein_coding	3846	4.10197	0.340669	12.0409	2.16559e-33	1.22933e-30	Up Regulated in Acute
ENSG00000088325.15	TPX2	protein_coding	534.631	4.15385	0.346011	12.005	3.34591e-33	1.83809e-30	Up Regulated in Acute
ENSG00000170456.14	DENND5B	protein_coding	594.125	2.92708	0.245479	11.924	8.87854e-33	4.72505e-30	Up Regulated in Acute
ENSG00000137804.12	NUSAP1	protein_coding	628.145	3.45599	0.291826	11.8426	2.34945e-32	1.21246e-29	Up Regulated in Acute
ENSG00000132465.10	JCHAIN	protein_coding	89076	5.30738	0.45126	11.7613	6.18072e-32	3.09581e-29	Up Regulated in Acute
ENSG00000111796.3	KLRB1	protein_coding	1055.95	-2.85472	0.243552	-11.7212	9.92373e-32	4.8286e-29	Down Regulated in Acute
ENSG00000035499.12	DEPDC1B	protein_coding	125.259	4.1971	0.358825	11.6968	1.32331e-31	6.26001e-29	Up Regulated in Acute
ENSG00000171320.14	ESCO2	protein_coding	89.3006	4.26779	0.364947	11.6943	1.36372e-31	6.27679e-29	Up Regulated in Acute
ENSG00000117724.12	CENPF	protein_coding	576.155	3.47618	0.297731	11.6756	1.6996e-31	7.6169e-29	Up Regulated in Acute
ENSG00000133328.3	HRASLS2	protein_coding	254.571	5.12856	0.440281	11.6484	2.33836e-31	1.02108e-28	Up Regulated in Acute
ENSG00000093009.9	CDC45	protein_coding	240.815	4.31939	0.371405	11.6299	2.9054e-31	1.23698e-28	Up Regulated in Acute
ENSG00000139618.14	BRCA2	protein_coding	295.972	2.66585	0.23081	11.5499	7.38683e-31	3.06824e-28	Up Regulated in Acute
ENSG00000152253.8	SPC25	protein_coding	95.5058	5.38657	0.466508	11.5466	7.6827e-31	3.11515e-28	Up Regulated in Acute
ENSG00000089169.14	RPH3A	protein_coding	182.804	-4.34269	0.376365	-11.5385	8.43921e-31	3.34232e-28	Down Regulated in Acute
ENSG00000137642.12	SORL1	protein_coding	5002.51	-1.98286	0.172217	-11.5138	1.12458e-30	4.35263e-28	Down Regulated in Acute
ENSG00000135476.11	ESPL1	protein_coding	223.627	3.88814	0.338233	11.4955	1.39012e-30	5.26084e-28	Up Regulated in Acute
ENSG00000080986.12	NDC80	protein_coding	376.32	2.77472	0.242199	11.4564	2.18446e-30	8.08727e-28	Up Regulated in Acute
ENSG00000170476.15	MZB1	protein_coding	7640.24	4.43777	0.390271	11.371	5.83207e-30	2.1132e-27	Up Regulated in Acute
ENSG00000112984.11	KIF20A	protein_coding	146.845	4.67208	0.411068	11.3657	6.19586e-30	2.19824e-27	Up Regulated in Acute
ENSG00000129173.12	E2F8	protein_coding	135.659	4.51406	0.397289	11.3622	6.45331e-30	2.24285e-27	Up Regulated in Acute
ENSG00000275395.4	FCGBP	protein_coding	125.744	-2.52301	0.2224	-11.3445	7.89836e-30	2.69018e-27	Down Regulated in Acute
ENSG00000094804.9	CDC6	protein_coding	401.829	4.74975	0.419108	11.333	9.00667e-30	3.00752e-27	Up Regulated in Acute
ENSG00000075218.18	GTSE1	protein_coding	159.076	4.16147	0.367609	11.3204	1.04038e-29	3.40724e-27	Up Regulated in Acute
ENSG00000089127.12	OAS1	protein_coding	5707.17	2.16793	0.191767	11.305	1.23921e-29	3.98184e-27	Up Regulated in Acute
ENSG00000135916.15	ITM2C	protein_coding	4688.03	3.65074	0.324741	11.242	2.53596e-29	7.95111e-27	Up Regulated in Acute
ENSG00000182749.5	PAQR7	protein_coding	212.876	-2.28403	0.20319	-11.2409	2.56789e-29	7.95111e-27	Down Regulated in Acute
ENSG00000171848.13	RRM2	protein_coding	2212.36	4.51878	0.402984	11.2133	3.50861e-29	1.06699e-26	Up Regulated in Acute
ENSG00000007968.6	E2F2	protein_coding	933.406	2.33487	0.208592	11.1934	4.39052e-29	1.31177e-26	Up Regulated in Acute
ENSG00000178445.8	GLDC	protein_coding	392.886	5.26673	0.47222	11.1531	6.91194e-29	2.02949e-26	Up Regulated in Acute
ENSG00000163568.13	AIM2	protein_coding	650.224	2.2369	0.200672	11.147	7.40288e-29	2.1368e-26	Up Regulated in Acute
ENSG00000196584.2	XRCC2	protein_coding	79.9985	3.20654	0.287934	11.1364	8.34536e-29	2.36869e-26	Up Regulated in Acute
ENSG00000124256.14	ZBP1	protein_coding	2552.79	2.09513	0.188702	11.1028	1.21515e-28	3.39245e-26	Up Regulated in Acute
ENSG00000185745.9	IFIT1	protein_coding	4190.98	4.36704	0.393433	11.0998	1.25672e-28	3.45193e-26	Up Regulated in Acute
ENSG00000068079.7	IFI35	protein_coding	2831.51	2.34089	0.211379	11.0744	1.67083e-28	4.51654e-26	Up Regulated in Acute
ENSG00000066279.16	ASPM	protein_coding	392.548	4.12681	0.372928	11.066	1.83499e-28	4.8828e-26	Up Regulated in Acute
ENSG00000173786.16	CNP	protein_coding	1447.52	1.42581	0.129017	11.0513	2.16029e-28	5.65995e-26	Up Regulated in Acute
ENSG00000176890.15	TYMS	protein_coding	776.703	4.27708	0.387719	11.0314	2.69692e-28	6.95886e-26	Up Regulated in Acute
ENSG00000169245.5	CXCL10	protein_coding	603.452	4.01827	0.364433	11.0261	2.86079e-28	7.27152e-26	Up Regulated in Acute
ENSG00000137965.10	IFI44	protein_coding	6376.3	3.1754	0.288635	11.0014	3.76043e-28	9.41767e-26	Up Regulated in Acute
ENSG00000030110.12	BAK1	protein_coding	1198.2	1.39356	0.126904	10.9812	4.70786e-28	1.16195e-25	Up Regulated in Acute
ENSG00000184445.11	KNTC1	protein_coding	947.467	1.8637	0.169891	10.97	5.32876e-28	1.29641e-25	Up Regulated in Acute
ENSG00000109805.9	NCAPG	protein_coding	489.246	4.16252	0.379834	10.9588	6.02844e-28	1.44598e-25	Up Regulated in Acute
ENSG00000137959.15	IFI44L	protein_coding	8066.84	4.17736	0.381341	10.9544	6.33028e-28	1.49729e-25	Up Regulated in Acute
ENSG00000065328.16	MCM10	protein_coding	178.003	4.93374	0.451568	10.9258	8.67725e-28	2.0243e-25	Up Regulated in Acute
ENSG00000100027.14	YPEL1	protein_coding	265.71	-1.65465	0.152371	-10.8593	1.80038e-27	4.14332e-25	Down Regulated in Acute
ENSG00000187837.3	HIST1H1C	protein_coding	607.731	2.56037	0.236542	10.8242	2.6451e-27	6.00615e-25	Up Regulated in Acute
ENSG00000137812.19	CASC5	protein_coding	222.801	3.72621	0.345044	10.7992	3.47124e-27	7.77832e-25	Up Regulated in Acute
ENSG00000152766.5	ANKRD22	protein_coding	467.518	4.13795	0.383962	10.777	4.42119e-27	9.7783e-25	Up Regulated in Acute
ENSG00000090889.11	KIF4A	protein_coding	175.086	4.55176	0.422847	10.7645	5.06127e-27	1.10504e-24	Up Regulated in Acute
ENSG00000112742.9	TTK	protein_coding	151.225	4.40858	0.410005	10.7525	5.76604e-27	1.24298e-24	Up Regulated in Acute
ENSG00000132646.10	PCNA	protein_coding	1523.55	2.28423	0.212513	10.7487	6.01333e-27	1.28009e-24	Up Regulated in Acute
ENSG00000186918.13	ZNF395	protein_coding	748.013	-1.80978	0.169385	-10.6844	1.20476e-26	2.53297e-24	Down Regulated in Acute
ENSG00000142731.10	PLK4	protein_coding	215.278	2.65491	0.248658	10.677	1.3048e-26	2.70984e-24	Up Regulated in Acute
ENSG00000170439.6	METTL7B	protein_coding	196.677	4.88121	0.457294	10.6741	1.34536e-26	2.76042e-24	Up Regulated in Acute
ENSG00000071967.11	CYBRD1	protein_coding	370.614	-2.43597	0.228358	-10.6673	1.44753e-26	2.9347e-24	Down Regulated in Acute
ENSG00000155660.10	PDIA4	protein_coding	5136.17	2.6334	0.247286	10.6492	1.75901e-26	3.52423e-24	Up Regulated in Acute
ENSG00000177409.11	SAMD9L	protein_coding	6957.91	2.69045	0.253109	10.6296	2.16988e-26	4.29686e-24	Up Regulated in Acute
ENSG00000187608.8	ISG15	protein_coding	2242.37	3.43523	0.323441	10.6209	2.38295e-26	4.66455e-24	Up Regulated in Acute
ENSG00000160999.10	SH2B2	protein_coding	242.946	1.84995	0.174486	10.6023	2.90827e-26	5.62816e-24	Up Regulated in Acute
ENSG00000105974.11	CAV1	protein_coding	132.236	4.99703	0.472359	10.5789	3.7344e-26	7.14571e-24	Up Regulated in Acute
ENSG00000106462.10	EZH2	protein_coding	926.67	1.75216	0.16567	10.5762	3.84304e-26	7.21281e-24	Up Regulated in Acute
ENSG00000118193.11	KIF14	protein_coding	104.228	4.5521	0.430421	10.5759	3.85417e-26	7.21281e-24	Up Regulated in Acute
ENSG00000115155.16	OTOF	protein_coding	675.04	5.79689	0.549765	10.5443	5.39683e-26	9.88258e-24	Up Regulated in Acute
ENSG00000139970.16	RTN1	protein_coding	341.05	-4.11524	0.39026	-10.5449	5.3645e-26	9.88258e-24	Down Regulated in Acute
ENSG00000111206.12	FOXM1	protein_coding	417.071	4.07049	0.38765	10.5004	8.59795e-26	1.55769e-23	Up Regulated in Acute
ENSG00000186185.13	KIF18B	protein_coding	138.696	4.22068	0.402358	10.4899	9.61724e-26	1.72402e-23	Up Regulated in Acute
ENSG00000095585.16	BLNK	protein_coding	685.334	2.06691	0.197109	10.4862	1.00016e-25	1.77425e-23	Up Regulated in Acute
ENSG00000099958.14	DERL3	protein_coding	1151.17	2.70092	0.2579	10.4727	1.15271e-25	2.02378e-23	Up Regulated in Acute
ENSG00000138180.15	CEP55	protein_coding	210.381	4.15315	0.397101	10.4587	1.3372e-25	2.32372e-23	Up Regulated in Acute
ENSG00000111335.12	OAS2	protein_coding	8079.76	2.3163	0.221535	10.4557	1.37986e-25	2.37364e-23	Up Regulated in Acute
ENSG00000134690.10	CDCA8	protein_coding	213.222	3.63457	0.348083	10.4417	1.59917e-25	2.72338e-23	Up Regulated in Acute
ENSG00000138778.11	CENPE	protein_coding	290.523	3.49891	0.335318	10.4346	1.72373e-25	2.90646e-23	Up Regulated in Acute
ENSG00000163808.16	KIF15	protein_coding	187.696	3.56658	0.341902	10.4316	1.7786e-25	2.96956e-23	Up Regulated in Acute
ENSG00000117650.12	NEK2	protein_coding	96.4562	4.11765	0.395026	10.4238	1.93157e-25	3.19366e-23	Up Regulated in Acute
ENSG00000101003.9	GINS1	protein_coding	113.26	3.73989	0.359137	10.4135	2.15105e-25	3.52235e-23	Up Regulated in Acute
ENSG00000164045.11	CDC25A	protein_coding	144.949	4.69068	0.452516	10.3658	3.54808e-25	5.75464e-23	Up Regulated in Acute
ENSG00000123352.17	SPATS2	protein_coding	622.583	2.75478	0.266632	10.3318	5.06229e-25	8.13309e-23	Up Regulated in Acute
ENSG00000127564.16	PKMYT1	protein_coding	113.923	4.42454	0.428472	10.3263	5.35883e-25	8.52905e-23	Up Regulated in Acute
ENSG00000117054.13	ACADM	protein_coding	775.126	1.85364	0.180429	10.2735	9.27693e-25	1.46283e-22	Up Regulated in Acute
ENSG00000115163.14	CENPA	protein_coding	73.2156	4.65268	0.455085	10.2238	1.55212e-24	2.42502e-22	Up Regulated in Acute
ENSG00000149131.15	SERPING1	protein_coding	1727.36	3.83376	0.37514	10.2195	1.62125e-24	2.50999e-22	Up Regulated in Acute
ENSG00000101057.15	MYBL2	protein_coding	1289.68	4.09636	0.401182	10.2107	1.77535e-24	2.7238e-22	Up Regulated in Acute
ENSG00000167900.11	TK1	protein_coding	353.494	3.97554	0.389648	10.2029	1.92429e-24	2.92595e-22	Up Regulated in Acute
ENSG00000157601.13	MX1	protein_coding	9850.25	3.38308	0.331769	10.1971	2.04279e-24	3.07864e-22	Up Regulated in Acute
ENSG00000026508.16	CD44	protein_coding	9506.25	-1.1385	0.11171	-10.1916	2.16212e-24	3.22991e-22	Down Regulated in Acute
ENSG00000188596.9	CFAP54	protein_coding	70.9314	4.71909	0.463822	10.1744	2.581e-24	3.82213e-22	Up Regulated in Acute
ENSG00000197299.10	BLM	protein_coding	408.194	1.89487	0.186511	10.1596	3.00405e-24	4.41025e-22	Up Regulated in Acute
ENSG00000002549.12	LAP3	protein_coding	4520.36	1.9978	0.197034	10.1394	3.69483e-24	5.37802e-22	Up Regulated in Acute
ENSG00000135114.12	OASL	protein_coding	1734.82	3.21558	0.317477	10.1285	4.12848e-24	5.9583e-22	Up Regulated in Acute
ENSG00000159131.16	GART	protein_coding	1111.59	1.35298	0.133836	10.1093	5.02632e-24	7.19313e-22	Up Regulated in Acute
ENSG00000108106.13	UBE2S	protein_coding	296.237	1.99399	0.197877	10.077	6.98584e-24	9.91407e-22	Up Regulated in Acute
ENSG00000148773.12	MKI67	protein_coding	2255.93	3.84631	0.383055	10.0411	1.00517e-23	1.41471e-21	Up Regulated in Acute
ENSG00000131470.14	PSMC3IP	protein_coding	120.202	2.46828	0.246129	10.0284	1.14353e-23	1.59625e-21	Up Regulated in Acute
ENSG00000167106.11	FAM102A	protein_coding	1594.09	-1.76778	0.176712	-10.0038	1.46702e-23	2.03116e-21	Down Regulated in Acute
ENSG00000011590.13	ZBTB32	protein_coding	233.474	3.53067	0.353456	9.98898	1.70317e-23	2.33911e-21	Up Regulated in Acute
ENSG00000143772.9	ITPKB	protein_coding	1542.45	-1.55749	0.156574	-9.94732	2.59054e-23	3.52935e-21	Down Regulated in Acute
ENSG00000143942.4	CHAC2	protein_coding	129.446	4.17517	0.419846	9.94452	2.66468e-23	3.60154e-21	Up Regulated in Acute
ENSG00000157456.7	CCNB2	protein_coding	354.368	4.23932	0.426584	9.93784	2.84939e-23	3.82087e-21	Up Regulated in Acute
ENSG00000143228.12	NUF2	protein_coding	252.996	3.45393	0.348822	9.90169	4.09289e-23	5.44547e-21	Up Regulated in Acute
ENSG00000175063.16	UBE2C	protein_coding	225.681	4.26083	0.431611	9.87191	5.51057e-23	7.27481e-21	Up Regulated in Acute
ENSG00000163565.18	IFI16	protein_coding	6203.84	1.27897	0.129604	9.86829	5.7131e-23	7.48416e-21	Up Regulated in Acute
ENSG00000137265.14	IRF4	protein_coding	3747.84	2.56074	0.259798	9.85667	6.41407e-23	8.33829e-21	Up Regulated in Acute
ENSG00000263961.6	C1orf186	protein_coding	217.041	2.09692	0.212819	9.85303	6.65074e-23	8.58046e-21	Up Regulated in Acute
ENSG00000085999.11	RAD54L	protein_coding	134.171	3.82887	0.388826	9.84726	7.04346e-23	9.01881e-21	Up Regulated in Acute
ENSG00000172469.14	MANEA	protein_coding	485.101	2.93228	0.298905	9.81007	1.01898e-22	1.29502e-20	Up Regulated in Acute
ENSG00000087077.11	TRIP6	protein_coding	221.751	1.45688	0.149002	9.77757	1.40543e-22	1.77292e-20	Up Regulated in Acute
ENSG00000158402.18	CDC25C	protein_coding	61.2243	4.92825	0.505242	9.75423	1.76938e-22	2.21562e-20	Up Regulated in Acute
ENSG00000149428.18	HYOU1	protein_coding	3567.58	2.04913	0.210139	9.75132	1.82081e-22	2.26339e-20	Up Regulated in Acute
ENSG00000126709.14	IFI6	protein_coding	5964.8	3.47272	0.357555	9.71241	2.66941e-22	3.2942e-20	Up Regulated in Acute
ENSG00000154511.11	FAM69A	protein_coding	489.808	2.24108	0.23136	9.68654	3.43992e-22	4.21452e-20	Up Regulated in Acute
ENSG00000165895.17	ARHGAP42	protein_coding	96.3217	4.08157	0.422367	9.66355	4.30676e-22	5.23886e-20	Up Regulated in Acute
ENSG00000161057.10	PSMC2	protein_coding	2051.88	1.20314	0.124884	9.63408	5.74022e-22	6.93305e-20	Up Regulated in Acute
ENSG00000135451.12	TROAP	protein_coding	180.833	3.76265	0.391864	9.60193	7.84619e-22	9.37621e-20	Up Regulated in Acute
ENSG00000180739.13	S1PR5	protein_coding	710.126	-2.74396	0.285782	-9.60158	7.87315e-22	9.37621e-20	Down Regulated in Acute
ENSG00000126787.12	DLGAP5	protein_coding	309.212	4.28736	0.446834	9.59497	8.39416e-22	9.92726e-20	Up Regulated in Acute
ENSG00000161381.13	PLXDC1	protein_coding	368.396	-2.18714	0.228297	-9.58024	9.68206e-22	1.13714e-19	Down Regulated in Acute
ENSG00000277856.1	AC233755.2	protein_coding	342.066	6.12471	0.63946	9.57794	9.90043e-22	1.15482e-19	Up Regulated in Acute
ENSG00000167553.14	TUBA1C	protein_coding	1056.82	1.45828	0.153129	9.52322	1.67896e-21	1.94508e-19	Up Regulated in Acute
ENSG00000162733.16	DDR2	protein_coding	78.0682	3.50874	0.369134	9.50533	1.99417e-21	2.29464e-19	Up Regulated in Acute
ENSG00000157168.18	NRG1	protein_coding	259.399	-3.63917	0.382929	-9.50351	2.02934e-21	2.31944e-19	Down Regulated in Acute
ENSG00000156970.12	BUB1B	protein_coding	206.285	3.96553	0.41739	9.50078	2.0832e-21	2.36513e-19	Up Regulated in Acute
ENSG00000165480.15	SKA3	protein_coding	126.302	4.45141	0.470319	9.46467	2.94499e-21	3.3214e-19	Up Regulated in Acute
ENSG00000140836.14	ZFHX3	protein_coding	258.918	-1.92274	0.2033	-9.45769	3.14806e-21	3.52707e-19	Down Regulated in Acute
ENSG00000169607.12	CKAP2L	protein_coding	101.06	3.88374	0.410727	9.45576	3.20688e-21	3.56948e-19	Up Regulated in Acute
ENSG00000158481.12	CD1C	protein_coding	484.184	-2.24619	0.237756	-9.44742	3.47273e-21	3.8403e-19	Down Regulated in Acute
ENSG00000121152.9	NCAPH	protein_coding	234.513	3.52073	0.372969	9.43976	3.73649e-21	4.10532e-19	Up Regulated in Acute
ENSG00000155366.16	RHOC	protein_coding	604.685	-1.57385	0.166992	-9.42467	4.31451e-21	4.71e-19	Down Regulated in Acute
ENSG00000172183.14	ISG20	protein_coding	2575.51	1.84749	0.196145	9.41902	4.55329e-21	4.93901e-19	Up Regulated in Acute
ENSG00000153066.12	TXNDC11	protein_coding	3908.23	2.31192	0.245551	9.41524	4.71986e-21	5.08729e-19	Up Regulated in Acute
ENSG00000105048.16	TNNT1	protein_coding	314.298	2.76388	0.293911	9.40379	5.26321e-21	5.63726e-19	Up Regulated in Acute
ENSG00000137198.9	GMPR	protein_coding	324.311	2.8137	0.29931	9.40061	5.42469e-21	5.77391e-19	Up Regulated in Acute
ENSG00000075702.16	WDR62	protein_coding	123.387	2.54443	0.270729	9.39843	5.53818e-21	5.85809e-19	Up Regulated in Acute
ENSG00000051341.13	POLQ	protein_coding	274.671	3.84522	0.40959	9.38797	6.11686e-21	6.43026e-19	Up Regulated in Acute
ENSG00000101412.12	E2F1	protein_coding	222.698	2.64578	0.282381	9.36952	7.28628e-21	7.6126e-19	Up Regulated in Acute
ENSG00000111665.11	CDCA3	protein_coding	222.873	4.05326	0.432687	9.36766	7.41563e-21	7.7005e-19	Up Regulated in Acute
ENSG00000228716.6	DHFR	protein_coding	562.089	1.90194	0.203454	9.34827	8.90912e-21	9.1953e-19	Up Regulated in Acute
ENSG00000065308.4	TRAM2	protein_coding	2174.44	2.22326	0.23832	9.32889	1.06985e-20	1.09756e-18	Up Regulated in Acute
ENSG00000183010.16	PYCR1	protein_coding	161.363	4.39584	0.471341	9.32624	1.09691e-20	1.11858e-18	Up Regulated in Acute
ENSG00000150337.13	FCGR1A	protein_coding	1586.06	2.04924	0.219765	9.3247	1.11295e-20	1.12819e-18	Up Regulated in Acute
ENSG00000111247.14	RAD51AP1	protein_coding	126.526	2.88428	0.309773	9.31095	1.26698e-20	1.27672e-18	Up Regulated in Acute
ENSG00000168078.9	PBK	protein_coding	93.144	4.50875	0.484329	9.30927	1.28712e-20	1.2894e-18	Up Regulated in Acute
ENSG00000198833.6	UBE2J1	protein_coding	6817.71	2.3762	0.255444	9.30225	1.37509e-20	1.36946e-18	Up Regulated in Acute
ENSG00000165891.15	E2F7	protein_coding	67.8346	3.5318	0.379937	9.29574	1.46184e-20	1.44739e-18	Up Regulated in Acute
ENSG00000205038.11	PKHD1L1	protein_coding	97.9761	2.86805	0.30905	9.28022	1.69131e-20	1.66491e-18	Up Regulated in Acute
ENSG00000103528.16	SYT17	protein_coding	53.5199	-2.92801	0.315914	-9.26836	1.89035e-20	1.85016e-18	Down Regulated in Acute
ENSG00000172794.19	RAB37	protein_coding	1289.66	-1.4293	0.154325	-9.26159	2.01414e-20	1.96004e-18	Down Regulated in Acute
ENSG00000110063.8	DCPS	protein_coding	719.428	2.0401	0.220308	9.2602	2.04054e-20	1.97446e-18	Up Regulated in Acute
ENSG00000110660.14	SLC35F2	protein_coding	259.292	2.05349	0.222226	9.24055	2.45233e-20	2.3595e-18	Up Regulated in Acute
ENSG00000058262.9	SEC61A1	protein_coding	5630.22	1.22636	0.132842	9.23175	2.66248e-20	2.5473e-18	Up Regulated in Acute
ENSG00000171241.8	SHCBP1	protein_coding	502.966	3.49489	0.378871	9.22448	2.84936e-20	2.71087e-18	Up Regulated in Acute
ENSG00000162062.14	C16orf59	protein_coding	31.4891	4.17694	0.452942	9.22179	2.92187e-20	2.76442e-18	Up Regulated in Acute
ENSG00000104738.16	MCM4	protein_coding	874.958	2.59548	0.281754	9.21188	3.20464e-20	2.99862e-18	Up Regulated in Acute
ENSG00000188282.12	RUFY4	protein_coding	721.557	2.75347	0.298892	9.21227	3.19293e-20	2.99862e-18	Up Regulated in Acute
ENSG00000143603.18	KCNN3	protein_coding	91.7704	4.20597	0.456628	9.21094	3.23288e-20	3.00853e-18	Up Regulated in Acute
ENSG00000143493.12	INTS7	protein_coding	483.624	1.42875	0.15514	9.20945	3.27791e-20	3.03385e-18	Up Regulated in Acute
ENSG00000065485.17	PDIA5	protein_coding	480.44	2.37647	0.258069	9.20865	3.30264e-20	3.04021e-18	Up Regulated in Acute
ENSG00000138385.15	SSB	protein_coding	2059.58	0.823204	0.0894053	9.20755	3.33658e-20	3.05494e-18	Up Regulated in Acute
ENSG00000125844.15	RRBP1	protein_coding	2468.61	1.56868	0.170457	9.20278	3.4882e-20	3.17668e-18	Up Regulated in Acute
ENSG00000169715.14	MT1E	protein_coding	162.02	3.32229	0.361118	9.2	3.57945e-20	3.24245e-18	Up Regulated in Acute
ENSG00000074695.5	LMAN1	protein_coding	2681.56	2.67625	0.291197	9.19052	3.9094e-20	3.52259e-18	Up Regulated in Acute
ENSG00000165806.19	CASP7	protein_coding	716.005	1.39031	0.151361	9.18539	4.10021e-20	3.67508e-18	Up Regulated in Acute
ENSG00000166803.10	KIAA0101	protein_coding	221.105	3.90309	0.425326	9.17671	4.44473e-20	3.96302e-18	Up Regulated in Acute
ENSG00000077152.9	UBE2T	protein_coding	207.056	3.45554	0.377078	9.16398	5.00156e-20	4.43628e-18	Up Regulated in Acute
ENSG00000100479.12	POLE2	protein_coding	95.0983	3.31974	0.362502	9.15785	5.29404e-20	4.67137e-18	Up Regulated in Acute
ENSG00000156802.12	ATAD2	protein_coding	682.937	1.86098	0.203587	9.14095	6.19042e-20	5.43417e-18	Up Regulated in Acute
ENSG00000185880.12	TRIM69	protein_coding	1505.7	1.62262	0.177679	9.13234	6.70367e-20	5.85454e-18	Up Regulated in Acute
ENSG00000140534.13	TICRR	protein_coding	97.3456	4.39378	0.481572	9.12382	7.25189e-20	6.30101e-18	Up Regulated in Acute
ENSG00000116748.19	AMPD1	protein_coding	31.1903	5.9664	0.654253	9.11942	7.55304e-20	6.52935e-18	Up Regulated in Acute
ENSG00000129757.12	CDKN1C	protein_coding	506.484	-3.61861	0.39714	-9.11167	8.11214e-20	6.97726e-18	Down Regulated in Acute
ENSG00000071539.13	TRIP13	protein_coding	167.315	3.82834	0.421139	9.09046	9.86229e-20	8.43994e-18	Up Regulated in Acute
ENSG00000133106.14	EPSTI1	protein_coding	2958.99	2.2295	0.245913	9.06622	1.23221e-19	1.04923e-17	Up Regulated in Acute
ENSG00000173369.15	C1QB	protein_coding	613.225	3.7083	0.409052	9.06558	1.23945e-19	1.05014e-17	Up Regulated in Acute
ENSG00000275063.1	AC233755.1	protein_coding	923.109	4.98308	0.55037	9.05405	1.37759e-19	1.1614e-17	Up Regulated in Acute
ENSG00000154217.14	PITPNC1	protein_coding	851.988	-1.35406	0.149607	-9.05078	1.41948e-19	1.19082e-17	Down Regulated in Acute
ENSG00000089685.14	BIRC5	protein_coding	347.125	3.63467	0.40173	9.04754	1.46231e-19	1.22074e-17	Up Regulated in Acute
ENSG00000197353.3	LYPD2	protein_coding	29.3054	-7.08421	0.783073	-9.04669	1.47374e-19	1.22428e-17	Down Regulated in Acute
ENSG00000204252.12	HLA-DOA	protein_coding	889.2	-1.26104	0.13942	-9.04492	1.49778e-19	1.23821e-17	Down Regulated in Acute
ENSG00000079931.14	MOXD1	protein_coding	89.3118	3.33464	0.368756	9.04292	1.52537e-19	1.24889e-17	Up Regulated in Acute
ENSG00000146670.9	CDCA5	protein_coding	429.624	3.57373	0.395185	9.0432	1.52158e-19	1.24889e-17	Up Regulated in Acute
ENSG00000170312.15	CDK1	protein_coding	369.508	4.02319	0.44676	9.00526	2.15164e-19	1.75323e-17	Up Regulated in Acute
ENSG00000136982.5	DSCC1	protein_coding	65.8386	3.77034	0.420324	8.97009	2.96279e-19	2.40268e-17	Up Regulated in Acute
ENSG00000144045.13	DQX1	protein_coding	27.1794	4.23194	0.471997	8.96602	3.07415e-19	2.48117e-17	Up Regulated in Acute
ENSG00000101849.15	TBL1X	protein_coding	911.208	-0.837406	0.0934302	-8.96291	3.16233e-19	2.54031e-17	Down Regulated in Acute
ENSG00000182853.11	VMO1	protein_coding	24.0562	-4.11231	0.459332	-8.9528	3.46589e-19	2.77108e-17	Down Regulated in Acute
ENSG00000005189.19	AC004381.6	protein_coding	56.5945	2.55892	0.287424	8.90293	5.43926e-19	4.32853e-17	Up Regulated in Acute
ENSG00000108641.14	B9D1	protein_coding	66.7671	3.31112	0.372859	8.88036	6.66467e-19	5.27904e-17	Up Regulated in Acute
ENSG00000114861.18	FOXP1	protein_coding	1539.86	-1.67551	0.188791	-8.87491	6.9992e-19	5.51835e-17	Down Regulated in Acute
ENSG00000163666.8	HESX1	protein_coding	122.081	3.72531	0.419906	8.87177	7.1995e-19	5.65012e-17	Up Regulated in Acute
ENSG00000137070.17	IL11RA	protein_coding	1204.93	-1.70679	0.19261	-8.86137	7.90375e-19	6.17435e-17	Down Regulated in Acute
ENSG00000150961.14	SEC24D	protein_coding	1240.86	1.80351	0.203641	8.85631	8.27077e-19	6.43156e-17	Up Regulated in Acute
ENSG00000185651.14	UBE2L3	protein_coding	2346.24	0.853196	0.0964373	8.84716	8.9776e-19	6.94948e-17	Up Regulated in Acute
ENSG00000145088.8	EAF2	protein_coding	1259.01	2.46839	0.279317	8.83723	9.81177e-19	7.53721e-17	Up Regulated in Acute
ENSG00000145386.9	CCNA2	protein_coding	317.913	3.61611	0.409197	8.83708	9.82537e-19	7.53721e-17	Up Regulated in Acute
ENSG00000176463.13	SLCO3A1	protein_coding	919.321	-1.0937	0.123981	-8.82149	1.12942e-18	8.62515e-17	Down Regulated in Acute
ENSG00000104147.8	OIP5	protein_coding	56.7157	4.12057	0.467143	8.8208	1.13644e-18	8.63998e-17	Up Regulated in Acute
ENSG00000163535.17	SGOL2	protein_coding	129.94	2.72304	0.308835	8.81713	1.1743e-18	8.88818e-17	Up Regulated in Acute
ENSG00000150687.11	PRSS23	protein_coding	238.571	-2.18531	0.247922	-8.81451	1.20208e-18	9.05815e-17	Down Regulated in Acute
ENSG00000166851.14	PLK1	protein_coding	228.772	3.36742	0.383052	8.79103	1.48196e-18	1.1118e-16	Up Regulated in Acute
ENSG00000137331.11	IER3	protein_coding	353.111	-2.45996	0.280351	-8.7746	1.71515e-18	1.28109e-16	Down Regulated in Acute
ENSG00000143297.18	FCRL5	protein_coding	1446.3	2.74366	0.313021	8.7651	1.8661e-18	1.38776e-16	Up Regulated in Acute
ENSG00000154839.9	SKA1	protein_coding	173.156	4.56187	0.520536	8.7638	1.88773e-18	1.39774e-16	Up Regulated in Acute
ENSG00000184271.15	POU6F1	protein_coding	303.98	-2.07943	0.237347	-8.76113	1.933e-18	1.42506e-16	Down Regulated in Acute
ENSG00000174442.11	ZWILCH	protein_coding	314.561	1.72689	0.197128	8.76027	1.94789e-18	1.42985e-16	Up Regulated in Acute
ENSG00000175505.10	CLCF1	protein_coding	101.233	-1.92794	0.220409	-8.74711	2.18885e-18	1.59983e-16	Down Regulated in Acute
ENSG00000122643.18	NT5C3A	protein_coding	1873.8	1.93409	0.221138	8.7461	2.20849e-18	1.60729e-16	Up Regulated in Acute
ENSG00000183087.14	GAS6	protein_coding	369.006	1.94694	0.222626	8.74533	2.22371e-18	1.61148e-16	Up Regulated in Acute
ENSG00000108679.12	LGALS3BP	protein_coding	2070.98	3.19845	0.366027	8.73829	2.36661e-18	1.70777e-16	Up Regulated in Acute
ENSG00000121621.6	KIF18A	protein_coding	88.6815	2.90994	0.334282	8.70505	3.17434e-18	2.28097e-16	Up Regulated in Acute
ENSG00000166411.13	IDH3A	protein_coding	1268	1.0779	0.12386	8.7025	3.24648e-18	2.32301e-16	Up Regulated in Acute
ENSG00000140525.17	FANCI	protein_coding	781.082	2.26636	0.260934	8.68556	3.76883e-18	2.68549e-16	Up Regulated in Acute
ENSG00000017483.14	SLC38A5	protein_coding	742.401	2.4927	0.287351	8.67476	4.14436e-18	2.94077e-16	Up Regulated in Acute
ENSG00000099204.18	ABLIM1	protein_coding	1828.41	-1.56798	0.181028	-8.66157	4.65326e-18	3.28818e-16	Down Regulated in Acute
ENSG00000186854.10	TRABD2A	protein_coding	1096.25	-1.73457	0.2009	-8.63398	5.92542e-18	4.16983e-16	Down Regulated in Acute
ENSG00000143870.12	PDIA6	protein_coding	6138.27	1.88409	0.218347	8.62887	6.19609e-18	4.34236e-16	Up Regulated in Acute
ENSG00000171522.5	PTGER4	protein_coding	738.225	-1.7064	0.19804	-8.61643	6.90755e-18	4.82113e-16	Down Regulated in Acute
ENSG00000120725.12	SIL1	protein_coding	701.8	1.5379	0.17851	8.61524	6.97924e-18	4.85128e-16	Up Regulated in Acute
ENSG00000167261.13	DPEP2	protein_coding	1819.38	-1.81686	0.211151	-8.60455	7.66183e-18	5.3041e-16	Down Regulated in Acute
ENSG00000088827.12	SIGLEC1	protein_coding	5442.92	4.32462	0.503282	8.59285	8.48394e-18	5.84945e-16	Up Regulated in Acute
ENSG00000117228.9	GBP1	protein_coding	3450.2	2.45547	0.286154	8.58093	9.41051e-18	6.46213e-16	Up Regulated in Acute
ENSG00000156299.12	TIAM1	protein_coding	817.47	-1.53701	0.179524	-8.56157	1.11339e-17	7.61485e-16	Down Regulated in Acute
ENSG00000128268.11	MGAT3	protein_coding	129.574	3.29912	0.385669	8.55429	1.18597e-17	8.05066e-16	Up Regulated in Acute
ENSG00000140931.19	CMTM3	protein_coding	1530.29	-1.54185	0.180245	-8.55423	1.18656e-17	8.05066e-16	Down Regulated in Acute
ENSG00000179218.13	CALR	protein_coding	13697.3	1.68525	0.197293	8.54184	1.32097e-17	8.92705e-16	Up Regulated in Acute
ENSG00000197971.14	MBP	protein_coding	2059.1	-1.19353	0.139801	-8.53736	1.3732e-17	9.24335e-16	Down Regulated in Acute
ENSG00000126215.13	XRCC3	protein_coding	167.259	1.47524	0.172837	8.53543	1.39635e-17	9.36212e-16	Up Regulated in Acute
ENSG00000173540.12	GMPPB	protein_coding	899.348	1.77553	0.208053	8.53402	1.41344e-17	9.43953e-16	Up Regulated in Acute
ENSG00000184661.13	CDCA2	protein_coding	164.728	4.09903	0.481157	8.5191	1.60798e-17	1.06968e-15	Up Regulated in Acute
ENSG00000179750.15	APOBEC3B	protein_coding	328.78	5.09533	0.59869	8.5108	1.7274e-17	1.14466e-15	Up Regulated in Acute
ENSG00000138166.5	DUSP5	protein_coding	1528.79	2.17444	0.255817	8.49996	1.89656e-17	1.25187e-15	Up Regulated in Acute
ENSG00000133216.16	EPHB2	protein_coding	272.596	2.49585	0.294018	8.48876	2.08855e-17	1.37328e-15	Up Regulated in Acute
ENSG00000012048.19	BRCA1	protein_coding	270.02	2.25911	0.266413	8.47972	2.25734e-17	1.47797e-15	Up Regulated in Acute
ENSG00000170482.16	SLC23A1	protein_coding	43.3467	3.56251	0.420141	8.47932	2.26512e-17	1.47797e-15	Up Regulated in Acute
ENSG00000010030.13	ETV7	protein_coding	208.75	3.47447	0.410145	8.47131	2.42639e-17	1.57716e-15	Up Regulated in Acute
ENSG00000138413.13	IDH1	protein_coding	1275.85	1.20569	0.142682	8.45023	2.90724e-17	1.88252e-15	Up Regulated in Acute
ENSG00000092470.11	WDR76	protein_coding	258.072	2.27942	0.270087	8.43957	3.185e-17	2.05456e-15	Up Regulated in Acute
ENSG00000100526.19	CDKN3	protein_coding	161.622	3.82013	0.453224	8.42877	3.49305e-17	2.24478e-15	Up Regulated in Acute
ENSG00000116667.12	C1orf21	protein_coding	288.141	-1.65482	0.196534	-8.42	3.76487e-17	2.41037e-15	Down Regulated in Acute
ENSG00000105698.15	USF2	protein_coding	1773.81	-0.763482	0.0906859	-8.41897	3.79824e-17	2.42262e-15	Down Regulated in Acute
ENSG00000115267.5	IFIH1	protein_coding	1697.49	2.02917	0.241271	8.41031	4.08917e-17	2.59845e-15	Up Regulated in Acute
ENSG00000153162.8	BMP6	protein_coding	134.189	3.52249	0.419104	8.4048	4.286e-17	2.7134e-15	Up Regulated in Acute
ENSG00000008256.15	CYTH3	protein_coding	172.564	-1.82552	0.217594	-8.38954	4.8804e-17	3.07826e-15	Down Regulated in Acute
ENSG00000143401.14	ANP32E	protein_coding	1331.92	1.16215	0.138653	8.38171	5.21624e-17	3.27796e-15	Up Regulated in Acute
ENSG00000126822.15	PLEKHG3	protein_coding	652.556	-1.8907	0.226091	-8.36255	6.13774e-17	3.84286e-15	Down Regulated in Acute
ENSG00000139734.17	DIAPH3	protein_coding	60.567	4.22723	0.505759	8.35819	6.36867e-17	3.97284e-15	Up Regulated in Acute
ENSG00000081913.13	PHLPP1	protein_coding	89.5624	-1.63619	0.195905	-8.35195	6.71445e-17	4.17325e-15	Down Regulated in Acute
ENSG00000196141.12	SPATS2L	protein_coding	494.729	2.41614	0.289695	8.3403	7.41047e-17	4.5891e-15	Up Regulated in Acute
ENSG00000183856.10	IQGAP3	protein_coding	46.1483	4.0089	0.480937	8.3356	7.71036e-17	4.75752e-15	Up Regulated in Acute
ENSG00000196562.14	SULF2	protein_coding	3303.75	-1.63952	0.196815	-8.33029	8.06465e-17	4.95816e-15	Down Regulated in Acute
ENSG00000081059.19	TCF7	protein_coding	3462.74	-1.84392	0.221877	-8.31056	9.52553e-17	5.81547e-15	Down Regulated in Acute
ENSG00000176658.16	MYO1D	protein_coding	379.796	2.53768	0.305357	8.31053	9.5274e-17	5.81547e-15	Up Regulated in Acute
ENSG00000165409.15	TSHR	protein_coding	59.5862	4.07281	0.490304	8.3067	9.83967e-17	5.98462e-15	Up Regulated in Acute
ENSG00000117143.13	UAP1	protein_coding	1391.94	2.8581	0.344155	8.30469	1.00083e-16	6.06554e-15	Up Regulated in Acute
ENSG00000173334.3	TRIB1	protein_coding	1760.67	2.66964	0.32149	8.30396	1.00695e-16	6.08099e-15	Up Regulated in Acute
ENSG00000119917.13	IFIT3	protein_coding	3629.29	3.87282	0.466452	8.30271	1.01767e-16	6.12398e-15	Up Regulated in Acute
ENSG00000067840.12	PDZD4	protein_coding	342.093	-2.42418	0.29219	-8.29659	1.07146e-16	6.425e-15	Down Regulated in Acute
ENSG00000182054.9	IDH2	protein_coding	2109.1	1.24067	0.149572	8.29482	1.08753e-16	6.4985e-15	Up Regulated in Acute
ENSG00000151725.11	CENPU	protein_coding	271.36	3.02758	0.365411	8.2854	1.17717e-16	7.00953e-15	Up Regulated in Acute
ENSG00000111602.11	TIMELESS	protein_coding	831.489	1.73533	0.209627	8.27815	1.25104e-16	7.42341e-15	Up Regulated in Acute
ENSG00000100883.11	SRP54	protein_coding	1359.18	1.46142	0.176637	8.27357	1.30012e-16	7.68784e-15	Up Regulated in Acute
ENSG00000196664.4	TLR7	protein_coding	987.91	1.87687	0.227217	8.26025	1.45368e-16	8.56617e-15	Up Regulated in Acute
ENSG00000026751.16	SLAMF7	protein_coding	4938.89	1.99447	0.242333	8.2303	1.8675e-16	1.09667e-14	Up Regulated in Acute
ENSG00000165948.10	IFI27L1	protein_coding	336.396	2.88694	0.350934	8.22645	1.92849e-16	1.1286e-14	Up Regulated in Acute
ENSG00000188536.12	HBA2	protein_coding	464.186	-5.42527	0.659985	-8.22029	2.03015e-16	1.18402e-14	Down Regulated in Acute
ENSG00000144354.13	CDCA7	protein_coding	240.944	1.92374	0.234039	8.21971	2.04004e-16	1.18458e-14	Up Regulated in Acute
ENSG00000160683.4	CXCR5	protein_coding	234.075	-1.85769	0.226013	-8.21941	2.04501e-16	1.18458e-14	Down Regulated in Acute
ENSG00000123989.13	CHPF	protein_coding	172.763	3.43903	0.418784	8.21194	2.17643e-16	1.25642e-14	Up Regulated in Acute
ENSG00000183763.8	TRAIP	protein_coding	119.166	2.48472	0.302593	8.21141	2.18611e-16	1.25775e-14	Up Regulated in Acute
ENSG00000108950.11	FAM20A	protein_coding	288.347	3.24475	0.395255	8.20925	2.22569e-16	1.27621e-14	Up Regulated in Acute
ENSG00000189233.11	NUGGC	protein_coding	387.565	3.05171	0.37222	8.19869	2.43015e-16	1.38877e-14	Up Regulated in Acute
ENSG00000163507.13	KIAA1524	protein_coding	227.792	2.17084	0.26491	8.19465	2.51323e-16	1.43145e-14	Up Regulated in Acute
ENSG00000111885.6	MAN1A1	protein_coding	2160.93	2.47236	0.302094	8.18406	2.74446e-16	1.55794e-14	Up Regulated in Acute
ENSG00000024526.16	DEPDC1	protein_coding	64.8478	4.21491	0.515614	8.17456	2.96956e-16	1.68012e-14	Up Regulated in Acute
ENSG00000138646.8	HERC5	protein_coding	1437.03	2.3432	0.286676	8.17367	2.9916e-16	1.68698e-14	Up Regulated in Acute
ENSG00000145287.10	PLAC8	protein_coding	6023.53	1.70616	0.2088	8.17126	3.05197e-16	1.71535e-14	Up Regulated in Acute
ENSG00000100714.15	MTHFD1	protein_coding	1086.02	1.32875	0.163321	8.13583	4.09132e-16	2.29195e-14	Up Regulated in Acute
ENSG00000137135.17	ARHGEF39	protein_coding	61.6333	3.20744	0.394731	8.12562	4.45078e-16	2.48514e-14	Up Regulated in Acute
ENSG00000220205.8	VAMP2	protein_coding	3517.88	-1.62939	0.200608	-8.12225	4.5762e-16	2.54682e-14	Down Regulated in Acute
ENSG00000134057.14	CCNB1	protein_coding	454.741	3.41402	0.420721	8.11467	4.871e-16	2.70206e-14	Up Regulated in Acute
ENSG00000186469.8	GNG2	protein_coding	1810.48	-1.1506	0.141829	-8.11261	4.95442e-16	2.73941e-14	Down Regulated in Acute
ENSG00000157445.14	CACNA2D3	protein_coding	177.975	-3.47626	0.428571	-8.11127	5.00925e-16	2.76076e-14	Down Regulated in Acute
ENSG00000138160.5	KIF11	protein_coding	463.764	3.17355	0.391506	8.10599	5.23188e-16	2.87416e-14	Up Regulated in Acute
ENSG00000092621.11	PHGDH	protein_coding	267.655	2.78478	0.343695	8.10249	5.38462e-16	2.94856e-14	Up Regulated in Acute
ENSG00000105173.13	CCNE1	protein_coding	200.162	2.22181	0.274273	8.10073	5.4631e-16	2.98194e-14	Up Regulated in Acute
ENSG00000048462.10	TNFRSF17	protein_coding	1917.01	4.66815	0.576397	8.09885	5.54824e-16	3.01874e-14	Up Regulated in Acute
ENSG00000174282.11	ZBTB4	protein_coding	1351.73	-1.34197	0.165766	-8.09557	5.69989e-16	3.09138e-14	Down Regulated in Acute
ENSG00000198901.13	PRC1	protein_coding	346.734	2.49853	0.308919	8.08799	6.06553e-16	3.27924e-14	Up Regulated in Acute
ENSG00000140451.12	PIF1	protein_coding	170.704	3.02966	0.374835	8.08264	6.33786e-16	3.41563e-14	Up Regulated in Acute
ENSG00000101695.8	RNF125	protein_coding	766.992	-1.41832	0.175793	-8.06814	7.13785e-16	3.83462e-14	Down Regulated in Acute
ENSG00000108829.9	LRRC59	protein_coding	1819.66	1.50949	0.187283	8.05995	7.6327e-16	4.08757e-14	Up Regulated in Acute
ENSG00000152700.13	SAR1B	protein_coding	1206.09	1.13189	0.140509	8.05563	7.90699e-16	4.22119e-14	Up Regulated in Acute
ENSG00000182809.10	CRIP2	protein_coding	54.2468	-2.35816	0.292957	-8.04949	8.31389e-16	4.42455e-14	Down Regulated in Acute
ENSG00000115677.16	HDLBP	protein_coding	5446.65	1.32765	0.164991	8.04678	8.5003e-16	4.50966e-14	Up Regulated in Acute
ENSG00000149636.15	DSN1	protein_coding	431.143	1.47643	0.183508	8.04558	8.58355e-16	4.53968e-14	Up Regulated in Acute
ENSG00000134326.11	CMPK2	protein_coding	1323.97	2.8642	0.35616	8.04189	8.84605e-16	4.66403e-14	Up Regulated in Acute
ENSG00000185989.10	RASA3	protein_coding	2280.46	-0.872191	0.108561	-8.03411	9.42621e-16	4.95458e-14	Down Regulated in Acute
ENSG00000115392.11	FANCL	protein_coding	231.424	1.57575	0.196167	8.0327	9.5352e-16	4.99645e-14	Up Regulated in Acute
ENSG00000153283.12	CD96	protein_coding	1548.53	-1.40969	0.175596	-8.02801	9.90639e-16	5.17503e-14	Down Regulated in Acute
ENSG00000197852.9	FAM212B	protein_coding	237.471	-1.55084	0.193815	-8.00167	1.22739e-15	6.39219e-14	Down Regulated in Acute
ENSG00000206172.8	HBA1	protein_coding	305.869	-4.75909	0.594794	-8.00123	1.23181e-15	6.39566e-14	Down Regulated in Acute
ENSG00000105612.8	DNASE2	protein_coding	1319.94	1.01058	0.126404	7.99484	1.29746e-15	6.70474e-14	Up Regulated in Acute
ENSG00000131378.13	RFTN1	protein_coding	944.769	-0.793935	0.099308	-7.99467	1.29922e-15	6.70474e-14	Down Regulated in Acute
ENSG00000173762.7	CD7	protein_coding	481.927	-1.79775	0.224911	-7.99315	1.31531e-15	6.76727e-14	Down Regulated in Acute
ENSG00000082515.16	MRPL22	protein_coding	547.891	1.42978	0.179004	7.9874	1.37813e-15	7.04891e-14	Up Regulated in Acute
ENSG00000087586.17	AURKA	protein_coding	252.91	3.03892	0.380464	7.98738	1.37833e-15	7.04891e-14	Up Regulated in Acute
ENSG00000150054.18	MPP7	protein_coding	325.415	-1.44762	0.18133	-7.98334	1.42426e-15	7.262e-14	Down Regulated in Acute
ENSG00000175305.16	CCNE2	protein_coding	108.832	2.62839	0.329413	7.97901	1.47507e-15	7.49863e-14	Up Regulated in Acute
ENSG00000266094.6	RASSF5	protein_coding	5225.27	-0.887693	0.111358	-7.97152	1.56732e-15	7.94391e-14	Down Regulated in Acute
ENSG00000138073.13	PREB	protein_coding	2060.82	1.40208	0.176108	7.96146	1.70022e-15	8.5919e-14	Up Regulated in Acute
ENSG00000079263.18	SP140	protein_coding	1751.46	1.34528	0.16918	7.95178	1.83847e-15	9.26304e-14	Up Regulated in Acute
ENSG00000100263.13	RHBDD3	protein_coding	167.49	1.32885	0.167247	7.94546	1.93469e-15	9.71911e-14	Up Regulated in Acute
ENSG00000162614.18	NEXN	protein_coding	353.979	2.63005	0.331238	7.94007	2.02063e-15	1.0121e-13	Up Regulated in Acute
ENSG00000134452.19	FBXO18	protein_coding	2213.04	1.18261	0.149107	7.93125	2.1695e-15	1.08348e-13	Up Regulated in Acute
ENSG00000244734.3	HBB	protein_coding	5551.73	-4.00425	0.505156	-7.92676	2.24945e-15	1.12012e-13	Down Regulated in Acute
ENSG00000100629.16	CEP128	protein_coding	326.211	2.99447	0.378227	7.91713	2.43065e-15	1.20682e-13	Up Regulated in Acute
ENSG00000138182.14	KIF20B	protein_coding	300.332	1.73749	0.219519	7.91496	2.47338e-15	1.22446e-13	Up Regulated in Acute
ENSG00000091490.10	SEL1L3	protein_coding	5010.55	1.99973	0.252786	7.91074	2.55863e-15	1.263e-13	Up Regulated in Acute
ENSG00000181789.14	COPG1	protein_coding	2724.7	1.04939	0.132776	7.90346	2.71276e-15	1.33521e-13	Up Regulated in Acute
ENSG00000197093.10	GAL3ST4	protein_coding	88.1266	-2.34631	0.297731	-7.88063	3.25722e-15	1.59857e-13	Down Regulated in Acute
ENSG00000163938.16	GNL3	protein_coding	2076.5	1.23916	0.157287	7.87836	3.31707e-15	1.62327e-13	Up Regulated in Acute
ENSG00000135862.5	LAMC1	protein_coding	429.289	2.29043	0.290922	7.87298	3.46282e-15	1.68974e-13	Up Regulated in Acute
ENSG00000175866.15	BAIAP2	protein_coding	108.064	-1.76542	0.224374	-7.86821	3.59738e-15	1.75038e-13	Down Regulated in Acute
ENSG00000142675.17	CNKSR1	protein_coding	195.681	2.6194	0.333241	7.86038	3.82974e-15	1.85813e-13	Up Regulated in Acute
ENSG00000177830.17	CHID1	protein_coding	526.79	1.0996	0.13992	7.85882	3.87781e-15	1.87611e-13	Up Regulated in Acute
ENSG00000167680.15	SEMA6B	protein_coding	136.805	-4.56294	0.580709	-7.85753	3.91784e-15	1.89011e-13	Down Regulated in Acute
ENSG00000198900.5	TOP1	protein_coding	1930.69	1.83577	0.233951	7.84683	4.26677e-15	2.05263e-13	Up Regulated in Acute
ENSG00000120885.19	CLU	protein_coding	1573.07	2.58777	0.330073	7.84	4.50559e-15	2.16141e-13	Up Regulated in Acute
ENSG00000179979.8	CRIPAK	protein_coding	208.796	-1.44406	0.184209	-7.83926	4.53206e-15	2.16801e-13	Down Regulated in Acute
ENSG00000111110.11	PPM1H	protein_coding	52.5499	-1.95691	0.249986	-7.82807	4.95423e-15	2.36332e-13	Down Regulated in Acute
ENSG00000115884.10	SDC1	protein_coding	179.749	5.82889	0.744782	7.8263	5.02418e-15	2.38999e-13	Up Regulated in Acute
ENSG00000166278.14	C2	protein_coding	182.701	2.58708	0.330668	7.82379	5.12546e-15	2.43138e-13	Up Regulated in Acute
ENSG00000151650.7	VENTX	protein_coding	316.082	-2.12243	0.271395	-7.82045	5.26357e-15	2.48996e-13	Down Regulated in Acute
ENSG00000185650.9	ZFP36L1	protein_coding	3993.79	-1.5221	0.194836	-7.81221	5.61919e-15	2.65083e-13	Down Regulated in Acute
ENSG00000149054.14	ZNF215	protein_coding	79.2166	4.03372	0.516568	7.80869	5.77841e-15	2.71841e-13	Up Regulated in Acute
ENSG00000126368.5	NR1D1	protein_coding	160.852	-2.15418	0.275888	-7.80818	5.80192e-15	2.72195e-13	Down Regulated in Acute
ENSG00000228253.1	MT-ATP8	protein_coding	2934.81	1.55028	0.198612	7.8056	5.92197e-15	2.77063e-13	Up Regulated in Acute
ENSG00000137310.11	TCF19	protein_coding	588.25	2.41309	0.309527	7.79608	6.38603e-15	2.97956e-13	Up Regulated in Acute
ENSG00000160932.10	LY6E	protein_coding	5583.3	1.87758	0.241048	7.78924	6.74143e-15	3.13679e-13	Up Regulated in Acute
ENSG00000145819.15	ARHGAP26	protein_coding	1787.85	-1.02633	0.131769	-7.78887	6.76125e-15	3.13744e-13	Down Regulated in Acute
ENSG00000075426.11	FOSL2	protein_coding	3020.77	-1.79987	0.23113	-7.78725	6.84814e-15	3.16913e-13	Down Regulated in Acute
ENSG00000142089.15	IFITM3	protein_coding	9891.94	2.54402	0.327214	7.77478	7.55775e-15	3.48803e-13	Up Regulated in Acute
ENSG00000182504.10	CEP97	protein_coding	369.801	1.39789	0.179825	7.77361	7.62822e-15	3.51104e-13	Up Regulated in Acute
ENSG00000164687.10	FABP5	protein_coding	592.567	2.43622	0.313666	7.76692	8.04189e-15	3.69146e-13	Up Regulated in Acute
ENSG00000133059.16	DSTYK	protein_coding	523.036	-1.13771	0.146554	-7.76308	8.2891e-15	3.79471e-13	Down Regulated in Acute
ENSG00000090861.15	AARS	protein_coding	1838.53	1.78825	0.230438	7.76023	8.47749e-15	3.86439e-13	Up Regulated in Acute
ENSG00000132530.16	XAF1	protein_coding	7583.08	2.17542	0.280335	7.76009	8.48668e-15	3.86439e-13	Up Regulated in Acute
ENSG00000067177.14	PHKA1	protein_coding	36.0893	3.86625	0.498246	7.75973	8.51086e-15	3.86507e-13	Up Regulated in Acute
ENSG00000198821.10	CD247	protein_coding	2588.24	-1.30728	0.168507	-7.75799	8.62886e-15	3.90823e-13	Down Regulated in Acute
ENSG00000003400.14	CASP10	protein_coding	2001.23	0.940985	0.12142	7.74981	9.20296e-15	4.1572e-13	Up Regulated in Acute
ENSG00000152518.6	ZFP36L2	protein_coding	7601.74	-1.53088	0.197573	-7.74844	9.30258e-15	4.19108e-13	Down Regulated in Acute
ENSG00000027075.13	PRKCH	protein_coding	1505.45	-1.22645	0.158318	-7.74674	9.42821e-15	4.23647e-13	Down Regulated in Acute
ENSG00000168394.10	TAP1	protein_coding	7016.69	1.12021	0.144629	7.74542	9.52678e-15	4.25829e-13	Up Regulated in Acute
ENSG00000168758.10	SEMA4C	protein_coding	251.322	-2.03394	0.262591	-7.74564	9.51037e-15	4.25829e-13	Down Regulated in Acute
ENSG00000159958.4	TNFRSF13C	protein_coding	576.889	-1.52949	0.197773	-7.73358	1.04566e-14	4.64952e-13	Down Regulated in Acute
ENSG00000198554.11	WDHD1	protein_coding	156.299	2.75669	0.356452	7.7337	1.04467e-14	4.64952e-13	Up Regulated in Acute
ENSG00000110777.11	POU2AF1	protein_coding	3545.83	2.9081	0.376055	7.73317	1.04902e-14	4.65229e-13	Up Regulated in Acute
ENSG00000068383.18	INPP5A	protein_coding	226.387	-1.34392	0.173966	-7.7252	1.1168e-14	4.94001e-13	Down Regulated in Acute
ENSG00000171067.10	C11orf24	protein_coding	512.952	1.24638	0.161358	7.72433	1.12445e-14	4.96098e-13	Up Regulated in Acute
ENSG00000101310.14	SEC23B	protein_coding	1564.58	1.21997	0.158258	7.70873	1.27074e-14	5.59193e-13	Up Regulated in Acute
ENSG00000168062.9	BATF2	protein_coding	187.096	2.91418	0.3781	7.70744	1.28364e-14	5.63413e-13	Up Regulated in Acute
ENSG00000181754.6	AMIGO1	protein_coding	243.096	-1.61147	0.209131	-7.70556	1.3027e-14	5.70306e-13	Down Regulated in Acute
ENSG00000133739.15	LRRCC1	protein_coding	183.188	1.48464	0.192727	7.7033	1.32598e-14	5.79013e-13	Up Regulated in Acute
ENSG00000159189.11	C1QC	protein_coding	285.231	4.65948	0.606134	7.6872	1.50387e-14	6.55011e-13	Up Regulated in Acute
ENSG00000117411.16	B4GALT2	protein_coding	123.871	2.86828	0.373241	7.68481	1.53228e-14	6.65682e-13	Up Regulated in Acute
ENSG00000100219.16	XBP1	protein_coding	9866.51	2.40056	0.312575	7.67993	1.59173e-14	6.8975e-13	Up Regulated in Acute
ENSG00000185155.11	MIXL1	protein_coding	65.6679	4.12391	0.53716	7.67726	1.62528e-14	7.025e-13	Up Regulated in Acute
ENSG00000159713.10	TPPP3	protein_coding	176.62	-2.19759	0.286287	-7.67617	1.63914e-14	7.06696e-13	Down Regulated in Acute
ENSG00000122223.12	CD244	protein_coding	1228.11	-1.76282	0.229784	-7.67164	1.69806e-14	7.30252e-13	Down Regulated in Acute
ENSG00000123416.15	TUBA1B	protein_coding	9030.31	1.65112	0.215275	7.6698	1.72264e-14	7.38345e-13	Up Regulated in Acute
ENSG00000179344.16	HLA-DQB1	protein_coding	4011.66	-1.08248	0.14114	-7.66958	1.72555e-14	7.38345e-13	Down Regulated in Acute
ENSG00000136682.14	CBWD2	protein_coding	796.505	1.17475	0.153266	7.6648	1.79112e-14	7.6448e-13	Up Regulated in Acute
ENSG00000130558.18	OLFM1	protein_coding	53.0486	-3.37045	0.439964	-7.66073	1.84874e-14	7.87102e-13	Down Regulated in Acute
ENSG00000173372.16	C1QA	protein_coding	765.876	2.40892	0.314608	7.65689	1.90485e-14	8.06956e-13	Up Regulated in Acute
ENSG00000185507.19	IRF7	protein_coding	1866.12	1.80465	0.235686	7.65702	1.90294e-14	8.06956e-13	Up Regulated in Acute
ENSG00000091651.8	ORC6	protein_coding	145.878	2.20083	0.287867	7.64528	2.08486e-14	8.81022e-13	Up Regulated in Acute
ENSG00000242574.8	HLA-DMB	protein_coding	5524.47	-1.34965	0.176701	-7.63806	2.20516e-14	9.29551e-13	Down Regulated in Acute
ENSG00000125144.13	MT1G	protein_coding	19.7967	6.5129	0.852915	7.63605	2.23996e-14	9.41889e-13	Up Regulated in Acute
ENSG00000071246.10	VASH1	protein_coding	589.936	-1.61627	0.211673	-7.63568	2.24639e-14	9.42267e-13	Down Regulated in Acute
ENSG00000017427.15	IGF1	protein_coding	103.191	4.47977	0.587274	7.62807	2.38291e-14	9.97075e-13	Up Regulated in Acute
ENSG00000188042.7	ARL4C	protein_coding	4899.11	-1.55344	0.203772	-7.62346	2.46972e-14	1.03087e-12	Down Regulated in Acute
ENSG00000169397.3	RNASE3	protein_coding	161.761	3.04293	0.399364	7.61946	2.54744e-14	1.06071e-12	Up Regulated in Acute
ENSG00000146410.11	MTFR2	protein_coding	104.933	2.43928	0.320307	7.61544	2.62787e-14	1.09153e-12	Up Regulated in Acute
ENSG00000073792.15	IGF2BP2	protein_coding	154.608	-2.04836	0.269015	-7.6143	2.65124e-14	1.09856e-12	Down Regulated in Acute
ENSG00000150967.17	ABCB9	protein_coding	226.047	2.80693	0.369874	7.58888	3.22683e-14	1.33381e-12	Up Regulated in Acute
ENSG00000183779.6	ZNF703	protein_coding	165.78	-2.5004	0.329557	-7.58716	3.26987e-14	1.34833e-12	Down Regulated in Acute
ENSG00000144749.13	LRIG1	protein_coding	474.42	-1.34033	0.176725	-7.58424	3.34454e-14	1.37579e-12	Down Regulated in Acute
ENSG00000189283.9	FHIT	protein_coding	357.958	-1.52681	0.201335	-7.58345	3.36498e-14	1.38086e-12	Down Regulated in Acute
ENSG00000169248.12	CXCL11	protein_coding	52.0885	5.07074	0.669781	7.57074	3.71095e-14	1.51917e-12	Up Regulated in Acute
ENSG00000099194.5	SCD	protein_coding	300.581	2.02875	0.268015	7.56951	3.7462e-14	1.52992e-12	Up Regulated in Acute
ENSG00000138496.16	PARP9	protein_coding	4280.28	1.76708	0.233685	7.56178	3.97577e-14	1.61979e-12	Up Regulated in Acute
ENSG00000173715.15	C11orf80	protein_coding	336.644	1.56796	0.207518	7.55577	4.16379e-14	1.69235e-12	Up Regulated in Acute
ENSG00000135069.13	PSAT1	protein_coding	268.303	2.99982	0.397677	7.54336	4.58006e-14	1.8571e-12	Up Regulated in Acute
ENSG00000187741.14	FANCA	protein_coding	569.209	1.81197	0.240438	7.53611	4.84212e-14	1.9587e-12	Up Regulated in Acute
ENSG00000020633.18	RUNX3	protein_coding	4830.71	-1.72323	0.228891	-7.52859	5.12928e-14	2.06995e-12	Down Regulated in Acute
ENSG00000112096.16	SOD2	protein_coding	3778.46	-1.26113	0.167538	-7.5274	5.1762e-14	2.07903e-12	Down Regulated in Acute
ENSG00000117118.9	SDHB	protein_coding	1604.84	0.91691	0.121809	7.52744	5.17443e-14	2.07903e-12	Up Regulated in Acute
ENSG00000142303.13	ADAMTS10	protein_coding	176.909	-2.0565	0.273465	-7.52017	5.47051e-14	2.19206e-12	Down Regulated in Acute
ENSG00000116663.10	FBXO6	protein_coding	611.948	1.35682	0.180454	7.51891	5.52367e-14	2.20817e-12	Up Regulated in Acute
ENSG00000157570.11	TSPAN18	protein_coding	212.657	-1.77629	0.236324	-7.51633	5.63364e-14	2.24686e-12	Down Regulated in Acute
ENSG00000146278.10	PNRC1	protein_coding	1926.91	-1.14155	0.151909	-7.51467	5.7053e-14	2.27012e-12	Down Regulated in Acute
ENSG00000173114.12	LRRN3	protein_coding	232.72	-1.69387	0.225568	-7.50936	5.94192e-14	2.35876e-12	Down Regulated in Acute
ENSG00000103966.9	EHD4	protein_coding	870.041	1.15114	0.153388	7.50476	6.15419e-14	2.43734e-12	Up Regulated in Acute
ENSG00000155265.10	GOLGA7B	protein_coding	246.098	-1.47888	0.197097	-7.50329	6.22354e-14	2.45909e-12	Down Regulated in Acute
ENSG00000106080.10	FKBP14	protein_coding	209.064	1.7795	0.237315	7.49847	6.45683e-14	2.53949e-12	Up Regulated in Acute
ENSG00000205336.11	ADGRG1	protein_coding	1545.2	-2.37292	0.316453	-7.49851	6.45469e-14	2.53949e-12	Down Regulated in Acute
ENSG00000112029.9	FBXO5	protein_coding	295.939	2.16392	0.289087	7.48538	7.13407e-14	2.79938e-12	Up Regulated in Acute
ENSG00000184831.13	APOO	protein_coding	134.326	1.47124	0.196822	7.47497	7.72234e-14	3.02325e-12	Up Regulated in Acute
ENSG00000153786.12	ZDHHC7	protein_coding	2486.96	-0.983413	0.131722	-7.46584	8.27702e-14	3.23297e-12	Down Regulated in Acute
ENSG00000137441.7	FGFBP2	protein_coding	1342.28	-2.26099	0.302944	-7.46338	8.43286e-14	3.28631e-12	Down Regulated in Acute
ENSG00000100911.13	PSME2	protein_coding	7888.55	1.22114	0.163982	7.44678	9.56439e-14	3.71876e-12	Up Regulated in Acute
ENSG00000184432.9	COPB2	protein_coding	2958.47	1.33723	0.17964	7.44393	9.77318e-14	3.79128e-12	Up Regulated in Acute
ENSG00000172005.10	MAL	protein_coding	678.368	-2.07761	0.279223	-7.44068	1.00169e-13	3.87699e-12	Down Regulated in Acute
ENSG00000174579.3	MSL2	protein_coding	1294.42	-0.760065	0.102246	-7.4337	1.05599e-13	4.07788e-12	Down Regulated in Acute
ENSG00000139626.15	ITGB7	protein_coding	5362.21	1.12498	0.151381	7.4315	1.07375e-13	4.13711e-12	Up Regulated in Acute
ENSG00000147324.10	MFHAS1	protein_coding	568.929	-1.26028	0.169676	-7.42756	1.10619e-13	4.25248e-12	Down Regulated in Acute
ENSG00000128050.8	PAICS	protein_coding	1141.78	1.8035	0.242931	7.42391	1.13712e-13	4.36152e-12	Up Regulated in Acute
ENSG00000132464.11	ENAM	protein_coding	49.9285	5.6127	0.75617	7.42254	1.14896e-13	4.39702e-12	Up Regulated in Acute
ENSG00000167513.8	CDT1	protein_coding	95.5637	3.54612	0.478199	7.41557	1.21103e-13	4.62419e-12	Up Regulated in Acute
ENSG00000130707.17	ASS1	protein_coding	17.5819	6.26399	0.844831	7.41448	1.22101e-13	4.65184e-12	Up Regulated in Acute
ENSG00000157514.16	TSC22D3	protein_coding	10803.4	-1.65235	0.223131	-7.40529	1.30864e-13	4.9746e-12	Down Regulated in Acute
ENSG00000153093.18	ACOXL	protein_coding	29.7374	5.12747	0.69346	7.39404	1.42438e-13	5.40248e-12	Up Regulated in Acute
ENSG00000168081.8	PNOC	protein_coding	263.689	1.91609	0.259211	7.392	1.44633e-13	5.47355e-12	Up Regulated in Acute
ENSG00000163902.11	RPN1	protein_coding	5223.79	1.28832	0.174309	7.39098	1.45749e-13	5.50356e-12	Up Regulated in Acute
ENSG00000065970.8	FOXJ2	protein_coding	740.694	-0.918694	0.124452	-7.38193	1.56011e-13	5.87802e-12	Down Regulated in Acute
ENSG00000073910.19	FRY	protein_coding	529.336	-1.45547	0.197178	-7.38149	1.56523e-13	5.88431e-12	Down Regulated in Acute
ENSG00000110448.10	CD5	protein_coding	1489.04	-1.45112	0.196644	-7.37942	1.58979e-13	5.96347e-12	Down Regulated in Acute
ENSG00000116299.16	KIAA1324	protein_coding	96.2444	-1.93793	0.262712	-7.37664	1.62335e-13	6.07598e-12	Down Regulated in Acute
ENSG00000185339.8	TCN2	protein_coding	1205.25	1.95263	0.264735	7.3758	1.63363e-13	6.10103e-12	Up Regulated in Acute
ENSG00000138035.14	PNPT1	protein_coding	834.664	1.53712	0.208422	7.37504	1.6429e-13	6.12223e-12	Up Regulated in Acute
ENSG00000164938.13	TP53INP1	protein_coding	3072.94	1.21795	0.165243	7.37065	1.69793e-13	6.31349e-12	Up Regulated in Acute
ENSG00000123975.4	CKS2	protein_coding	286.439	2.76886	0.375974	7.36448	1.77833e-13	6.59804e-12	Up Regulated in Acute
ENSG00000162496.8	DHRS3	protein_coding	356.039	-2.19655	0.298286	-7.36391	1.78598e-13	6.612e-12	Down Regulated in Acute
ENSG00000076382.16	SPAG5	protein_coding	586.668	2.27867	0.30949	7.36266	1.80275e-13	6.65963e-12	Up Regulated in Acute
ENSG00000131153.8	GINS2	protein_coding	284.468	3.56623	0.484459	7.36128	1.82159e-13	6.71465e-12	Up Regulated in Acute
ENSG00000100298.15	APOBEC3H	protein_coding	205.044	1.94429	0.264211	7.35885	1.85495e-13	6.82285e-12	Up Regulated in Acute
ENSG00000125885.13	MCM8	protein_coding	287.307	1.96587	0.267217	7.35685	1.88308e-13	6.91138e-12	Up Regulated in Acute
ENSG00000196323.11	ZBTB44	protein_coding	1157.97	-0.941713	0.128076	-7.35279	1.9411e-13	7.10901e-12	Down Regulated in Acute
ENSG00000138760.8	SCARB2	protein_coding	2214.01	1.05416	0.143477	7.34723	2.02353e-13	7.39499e-12	Up Regulated in Acute
ENSG00000166313.18	APBB1	protein_coding	482.73	-1.63473	0.222553	-7.34534	2.05231e-13	7.48411e-12	Down Regulated in Acute
ENSG00000087116.13	ADAMTS2	protein_coding	92.9109	5.16549	0.704008	7.33725	2.1802e-13	7.93349e-12	Up Regulated in Acute
ENSG00000013375.15	PGM3	protein_coding	571.816	1.51216	0.206203	7.33339	2.2441e-13	8.14862e-12	Up Regulated in Acute
ENSG00000206077.10	ZDHHC11B	protein_coding	40.791	-3.33735	0.455285	-7.33023	2.2976e-13	8.32515e-12	Down Regulated in Acute
ENSG00000165795.20	NDRG2	protein_coding	230.748	-1.55207	0.211985	-7.32162	2.44991e-13	8.85816e-12	Down Regulated in Acute
ENSG00000146918.19	NCAPG2	protein_coding	415.017	1.79843	0.245774	7.31739	2.5284e-13	9.12258e-12	Up Regulated in Acute
ENSG00000178999.12	AURKB	protein_coding	331.058	3.20493	0.438213	7.31363	2.60023e-13	9.36194e-12	Up Regulated in Acute
ENSG00000026652.13	AGPAT4	protein_coding	555.347	-1.31884	0.180339	-7.31314	2.60979e-13	9.37654e-12	Down Regulated in Acute
ENSG00000114812.12	VIPR1	protein_coding	741.096	-1.77385	0.242628	-7.31102	2.65125e-13	9.50542e-12	Down Regulated in Acute
ENSG00000152455.15	SUV39H2	protein_coding	81.4454	2.38812	0.326699	7.30984	2.67451e-13	9.56868e-12	Up Regulated in Acute
ENSG00000111291.8	GPRC5D	protein_coding	190.765	4.95657	0.678267	7.3077	2.71753e-13	9.7022e-12	Up Regulated in Acute
ENSG00000168439.16	STIP1	protein_coding	1605.32	0.931842	0.127556	7.30537	2.76503e-13	9.85116e-12	Up Regulated in Acute
ENSG00000101447.13	FAM83D	protein_coding	52.4294	2.74175	0.375386	7.30382	2.79717e-13	9.94486e-12	Up Regulated in Acute
ENSG00000130956.13	HABP4	protein_coding	244.402	-1.47375	0.201792	-7.30331	2.80783e-13	9.96196e-12	Down Regulated in Acute
ENSG00000133119.12	RFC3	protein_coding	202.13	1.4729	0.201831	7.2977	2.92737e-13	1.03645e-11	Up Regulated in Acute
ENSG00000138346.14	DNA2	protein_coding	153.644	2.10414	0.288589	7.29112	3.07384e-13	1.0838e-11	Up Regulated in Acute
ENSG00000185950.8	IRS2	protein_coding	954.942	-2.41791	0.331619	-7.29123	3.07132e-13	1.0838e-11	Down Regulated in Acute
ENSG00000196372.12	ASB13	protein_coding	290.927	-1.15697	0.159011	-7.27603	3.43776e-13	1.20961e-11	Down Regulated in Acute
ENSG00000182162.9	P2RY8	protein_coding	2862.31	-1.02681	0.141158	-7.27419	3.485e-13	1.2237e-11	Down Regulated in Acute
ENSG00000182107.6	TMEM30B	protein_coding	42.4327	-2.78632	0.383144	-7.27225	3.53541e-13	1.23885e-11	Down Regulated in Acute
ENSG00000112118.17	MCM3	protein_coding	1685.01	1.49284	0.205383	7.26858	3.63277e-13	1.27035e-11	Up Regulated in Acute
ENSG00000196517.11	SLC6A9	protein_coding	23.735	3.9546	0.544464	7.2633	3.77755e-13	1.31827e-11	Up Regulated in Acute
ENSG00000168675.18	LDLRAD4	protein_coding	399.951	-1.13429	0.156228	-7.26051	3.85621e-13	1.34297e-11	Down Regulated in Acute
ENSG00000125520.13	SLC2A4RG	protein_coding	431.794	-1.04411	0.143844	-7.25864	3.90995e-13	1.35891e-11	Down Regulated in Acute
ENSG00000100206.9	DMC1	protein_coding	27.6468	3.77994	0.521102	7.25375	4.05382e-13	1.40604e-11	Up Regulated in Acute
ENSG00000112276.13	BVES	protein_coding	15.7213	5.1275	0.707428	7.24809	4.22689e-13	1.46309e-11	Up Regulated in Acute
ENSG00000138674.16	SEC31A	protein_coding	2583.52	0.83893	0.115758	7.24729	4.25187e-13	1.46875e-11	Up Regulated in Acute
ENSG00000145743.15	FBXL17	protein_coding	222.188	-0.98952	0.136597	-7.24407	4.35423e-13	1.50106e-11	Down Regulated in Acute
ENSG00000173848.18	NET1	protein_coding	469.463	1.78532	0.246657	7.23809	4.55061e-13	1.56559e-11	Up Regulated in Acute
ENSG00000100342.20	APOL1	protein_coding	1143.92	1.42026	0.19635	7.23334	4.71267e-13	1.61808e-11	Up Regulated in Acute
ENSG00000177374.12	HIC1	protein_coding	45.7418	-3.88777	0.537519	-7.23281	4.73086e-13	1.62106e-11	Down Regulated in Acute
ENSG00000096080.11	MRPS18A	protein_coding	592.141	1.23765	0.171224	7.22828	4.89144e-13	1.67272e-11	Up Regulated in Acute
ENSG00000183508.4	FAM46C	protein_coding	5370.75	2.72341	0.376854	7.22671	4.94831e-13	1.68877e-11	Up Regulated in Acute
ENSG00000134109.10	EDEM1	protein_coding	3453.54	1.26196	0.174675	7.22465	5.02407e-13	1.7112e-11	Up Regulated in Acute
ENSG00000168496.3	FEN1	protein_coding	719.628	2.42553	0.335891	7.2212	5.15307e-13	1.75163e-11	Up Regulated in Acute
ENSG00000100307.12	CBX7	protein_coding	933.178	-1.2806	0.177384	-7.21937	5.22282e-13	1.7718e-11	Down Regulated in Acute
ENSG00000166451.13	CENPN	protein_coding	198.462	2.6331	0.365242	7.2092	5.62795e-13	1.90545e-11	Up Regulated in Acute
ENSG00000120254.15	MTHFD1L	protein_coding	216.842	2.19747	0.304967	7.20562	5.77806e-13	1.95239e-11	Up Regulated in Acute
ENSG00000144395.17	CCDC150	protein_coding	70.7813	3.42616	0.475606	7.20379	5.85623e-13	1.97488e-11	Up Regulated in Acute
ENSG00000124243.17	BCAS4	protein_coding	213.128	-1.46573	0.203508	-7.20233	5.91933e-13	1.99222e-11	Down Regulated in Acute
ENSG00000102384.13	CENPI	protein_coding	51.3963	2.8279	0.393842	7.18029	6.95644e-13	2.33665e-11	Up Regulated in Acute
ENSG00000161835.10	GRASP	protein_coding	263.752	-2.90965	0.40529	-7.17917	7.01383e-13	2.35129e-11	Down Regulated in Acute
ENSG00000112312.9	GMNN	protein_coding	358.511	2.40827	0.335878	7.17008	7.49547e-13	2.50782e-11	Up Regulated in Acute
ENSG00000117020.16	AKT3	protein_coding	338.401	-1.02679	0.143227	-7.16896	7.55709e-13	2.52347e-11	Down Regulated in Acute
ENSG00000203760.8	CENPW	protein_coding	182.192	2.59206	0.362044	7.15952	8.09607e-13	2.69816e-11	Up Regulated in Acute
ENSG00000035720.7	STAP1	protein_coding	492.566	1.55019	0.216737	7.15239	8.52827e-13	2.83665e-11	Up Regulated in Acute
ENSG00000153989.7	NUS1	protein_coding	990.458	0.952246	0.133354	7.14072	9.28402e-13	3.082e-11	Up Regulated in Acute
ENSG00000198826.10	ARHGAP11A	protein_coding	327.91	2.03288	0.284818	7.13746	9.50733e-13	3.15e-11	Up Regulated in Acute
ENSG00000177602.5	GSG2	protein_coding	87.038	3.82013	0.535442	7.13453	9.71196e-13	3.21155e-11	Up Regulated in Acute
ENSG00000132849.18	INADL	protein_coding	247.823	-1.55002	0.217372	-7.13075	9.98244e-13	3.29459e-11	Down Regulated in Acute
ENSG00000128595.16	CALU	protein_coding	1288.03	1.57255	0.22085	7.12046	1.07565e-12	3.54318e-11	Up Regulated in Acute
ENSG00000176595.3	KBTBD11	protein_coding	588.197	-1.53712	0.216219	-7.10907	1.16827e-12	3.84087e-11	Down Regulated in Acute
ENSG00000078687.16	TNRC6C	protein_coding	558.656	-1.64933	0.232032	-7.1082	1.17567e-12	3.85774e-11	Down Regulated in Acute
ENSG00000101811.13	CSTF2	protein_coding	319.24	0.905528	0.127416	7.10685	1.18721e-12	3.8881e-11	Up Regulated in Acute
ENSG00000070961.14	ATP2B1	protein_coding	1788.06	-1.14894	0.161774	-7.10216	1.22824e-12	4.01475e-11	Down Regulated in Acute
ENSG00000155657.23	TTN	protein_coding	336.656	-2.03284	0.286348	-7.09919	1.25491e-12	4.09408e-11	Down Regulated in Acute
ENSG00000163362.10	C1orf106	protein_coding	13.9466	4.96392	0.69927	7.09871	1.25923e-12	4.10031e-11	Up Regulated in Acute
ENSG00000176102.11	CSTF3	protein_coding	533.075	1.09292	0.153969	7.09835	1.26259e-12	4.10342e-11	Up Regulated in Acute
ENSG00000124203.5	ZNF831	protein_coding	485.407	-1.40064	0.197514	-7.09137	1.32794e-12	4.30758e-11	Down Regulated in Acute
ENSG00000078081.7	LAMP3	protein_coding	157.269	3.57051	0.503655	7.08919	1.34896e-12	4.36744e-11	Up Regulated in Acute
ENSG00000124772.11	CPNE5	protein_coding	1163.58	2.47117	0.3487	7.0868	1.37251e-12	4.43528e-11	Up Regulated in Acute
ENSG00000115977.18	AAK1	protein_coding	1774.66	-1.21863	0.171996	-7.0852	1.38839e-12	4.47809e-11	Down Regulated in Acute
ENSG00000071073.12	MGAT4A	protein_coding	1523.18	-1.21855	0.172048	-7.08261	1.41469e-12	4.54955e-11	Down Regulated in Acute
ENSG00000154122.12	ANKH	protein_coding	451.399	-1.27872	0.180547	-7.08249	1.41589e-12	4.54955e-11	Down Regulated in Acute
ENSG00000136514.2	RTP4	protein_coding	488.996	1.6298	0.230138	7.08184	1.42258e-12	4.56243e-11	Up Regulated in Acute
ENSG00000100220.11	RTCB	protein_coding	1859.14	0.765016	0.108052	7.08008	1.4407e-12	4.60323e-11	Up Regulated in Acute
ENSG00000185885.15	IFITM1	protein_coding	5315.54	2.17484	0.307176	7.08012	1.4403e-12	4.60323e-11	Up Regulated in Acute
ENSG00000156587.15	UBE2L6	protein_coding	4459.63	1.12802	0.159358	7.07854	1.45682e-12	4.646e-11	Up Regulated in Acute
ENSG00000143502.14	SUSD4	protein_coding	100.563	-1.82045	0.257487	-7.07006	1.54866e-12	4.92967e-11	Down Regulated in Acute
ENSG00000051180.16	RAD51	protein_coding	174.035	3.62176	0.512509	7.06672	1.58641e-12	5.039e-11	Up Regulated in Acute
ENSG00000169504.14	CLIC4	protein_coding	914.213	1.51294	0.214101	7.0665	1.58893e-12	5.039e-11	Up Regulated in Acute
ENSG00000101868.10	POLA1	protein_coding	301.999	1.20667	0.17084	7.06317	1.62744e-12	5.15153e-11	Up Regulated in Acute
ENSG00000149294.16	NCAM1	protein_coding	220.119	-1.57238	0.222728	-7.05965	1.66923e-12	5.27403e-11	Down Regulated in Acute
ENSG00000147889.16	CDKN2A	protein_coding	56.6063	2.18809	0.310091	7.05629	1.71005e-12	5.39299e-11	Up Regulated in Acute
ENSG00000135929.8	CYP27A1	protein_coding	659.44	-2.34827	0.333258	-7.04641	1.83596e-12	5.77938e-11	Down Regulated in Acute
ENSG00000115415.18	STAT1	protein_coding	7799	1.85636	0.263578	7.04294	1.88225e-12	5.91416e-11	Up Regulated in Acute
ENSG00000171798.17	KNDC1	protein_coding	33.664	-3.93951	0.559485	-7.04131	1.90443e-12	5.97281e-11	Down Regulated in Acute
ENSG00000180758.11	GPR157	protein_coding	67.5365	-1.59629	0.227017	-7.03159	2.04195e-12	6.39235e-11	Down Regulated in Acute
ENSG00000179981.9	TSHZ1	protein_coding	465.358	-1.26627	0.180191	-7.02738	2.10445e-12	6.57591e-11	Down Regulated in Acute
ENSG00000089094.16	KDM2B	protein_coding	1043.63	-0.933546	0.132989	-7.01972	2.22316e-12	6.93413e-11	Down Regulated in Acute
ENSG00000128394.16	APOBEC3F	protein_coding	279.834	1.34649	0.192161	7.00709	2.43328e-12	7.57564e-11	Up Regulated in Acute
ENSG00000134321.11	RSAD2	protein_coding	2342.52	3.42901	0.489382	7.00682	2.43795e-12	7.57634e-11	Up Regulated in Acute
ENSG00000100162.14	CENPM	protein_coding	108.416	3.28458	0.468873	7.00526	2.46521e-12	7.6471e-11	Up Regulated in Acute
ENSG00000167074.14	TEF	protein_coding	148.839	-1.22268	0.174634	-7.00136	2.53494e-12	7.84911e-11	Down Regulated in Acute
ENSG00000123609.10	NMI	protein_coding	1832.68	1.08571	0.155079	7.00101	2.54131e-12	7.85452e-11	Up Regulated in Acute
ENSG00000197943.9	PLCG2	protein_coding	2645.57	0.935016	0.133601	6.99855	2.5862e-12	7.97881e-11	Up Regulated in Acute
ENSG00000106123.11	EPHB6	protein_coding	394.234	-1.41608	0.202366	-6.99764	2.60317e-12	8.01637e-11	Down Regulated in Acute
ENSG00000198574.5	SH2D1B	protein_coding	189.591	-2.08582	0.298086	-6.99739	2.60779e-12	8.01637e-11	Down Regulated in Acute
ENSG00000117632.20	STMN1	protein_coding	1920.07	2.24627	0.321223	6.99288	2.69309e-12	8.26367e-11	Up Regulated in Acute
ENSG00000227507.2	LTB	protein_coding	2105.65	-1.58841	0.227182	-6.99178	2.71423e-12	8.31356e-11	Down Regulated in Acute
ENSG00000133392.16	MYH11	protein_coding	34.332	3.69412	0.529662	6.97449	3.06987e-12	9.38598e-11	Up Regulated in Acute
ENSG00000091831.21	ESR1	protein_coding	68.1051	2.33844	0.33545	6.97104	3.146e-12	9.60152e-11	Up Regulated in Acute
ENSG00000129255.14	MPDU1	protein_coding	1415.07	0.851183	0.122356	6.95663	3.48501e-12	1.06171e-10	Up Regulated in Acute
ENSG00000124766.5	SOX4	protein_coding	310.159	-2.08775	0.300329	-6.95154	3.61321e-12	1.0988e-10	Down Regulated in Acute
ENSG00000135047.14	CTSL	protein_coding	1182.36	1.83038	0.263448	6.94777	3.71107e-12	1.12655e-10	Up Regulated in Acute
ENSG00000198959.11	TGM2	protein_coding	172.017	2.26973	0.326748	6.94643	3.74639e-12	1.13525e-10	Up Regulated in Acute
ENSG00000069188.16	SDK2	protein_coding	53.1565	-2.02499	0.29164	-6.94345	3.82638e-12	1.15743e-10	Down Regulated in Acute
ENSG00000074696.12	HACD3	protein_coding	433.034	1.16952	0.168721	6.93172	4.15767e-12	1.25541e-10	Up Regulated in Acute
ENSG00000067057.16	PFKP	protein_coding	802.35	1.2748	0.184117	6.92385	4.39527e-12	1.3248e-10	Up Regulated in Acute
ENSG00000132313.14	MRPL35	protein_coding	635.076	1.02629	0.148302	6.92025	4.50855e-12	1.35655e-10	Up Regulated in Acute
ENSG00000205413.7	SAMD9	protein_coding	2987.31	2.06262	0.298174	6.91752	4.59626e-12	1.3805e-10	Up Regulated in Acute
ENSG00000100462.15	PRMT5	protein_coding	842.729	1.11243	0.160961	6.91119	4.80605e-12	1.44097e-10	Up Regulated in Acute
ENSG00000150867.13	PIP4K2A	protein_coding	2742.8	-0.912094	0.132004	-6.9096	4.86011e-12	1.45462e-10	Down Regulated in Acute
ENSG00000166794.4	PPIB	protein_coding	14627.6	1.96095	0.28412	6.90183	5.13364e-12	1.53379e-10	Up Regulated in Acute
ENSG00000163050.16	ADCK3	protein_coding	1019.52	-0.886938	0.128534	-6.90041	5.18537e-12	1.54653e-10	Down Regulated in Acute
ENSG00000198932.12	GPRASP1	protein_coding	467.131	-1.73013	0.251155	-6.88869	5.63083e-12	1.67645e-10	Down Regulated in Acute
ENSG00000198924.7	DCLRE1A	protein_coding	217.306	1.70796	0.247947	6.88844	5.64094e-12	1.67653e-10	Up Regulated in Acute
ENSG00000168268.10	NT5DC2	protein_coding	596.542	2.13467	0.310191	6.8818	5.91024e-12	1.75351e-10	Up Regulated in Acute
ENSG00000169239.12	CA5B	protein_coding	428.415	-1.02997	0.149735	-6.87863	6.04305e-12	1.78979e-10	Down Regulated in Acute
ENSG00000117643.14	MAN1C1	protein_coding	260.641	-1.3566	0.197232	-6.87821	6.0608e-12	1.79193e-10	Down Regulated in Acute
ENSG00000163590.13	PPM1L	protein_coding	311.079	-1.13463	0.165126	-6.87128	6.36273e-12	1.87794e-10	Down Regulated in Acute
ENSG00000121380.12	BCL2L14	protein_coding	36.4009	4.10908	0.598136	6.86981	6.42893e-12	1.8942e-10	Up Regulated in Acute
ENSG00000120896.13	SORBS3	protein_coding	366.113	-1.58569	0.230845	-6.86906	6.46245e-12	1.90079e-10	Down Regulated in Acute
ENSG00000113407.13	TARS	protein_coding	1381.9	1.35119	0.196767	6.86695	6.55872e-12	1.92578e-10	Up Regulated in Acute
ENSG00000139567.12	ACVRL1	protein_coding	119.691	2.49918	0.364108	6.86383	6.70365e-12	1.96494e-10	Up Regulated in Acute
ENSG00000131724.10	IL13RA1	protein_coding	1357.29	-1.24995	0.182124	-6.86319	6.73413e-12	1.97048e-10	Down Regulated in Acute
ENSG00000134061.5	CD180	protein_coding	1526.16	2.03004	0.295881	6.86101	6.8377e-12	1.99736e-10	Up Regulated in Acute
ENSG00000183484.11	GPR132	protein_coding	389.74	-1.17362	0.171067	-6.8606	6.85724e-12	1.99964e-10	Down Regulated in Acute
ENSG00000121858.10	TNFSF10	protein_coding	5325.55	1.45687	0.21241	6.85876	6.9462e-12	2.01638e-10	Up Regulated in Acute
ENSG00000179912.19	R3HDM2	protein_coding	833.404	-1.12883	0.164584	-6.85868	6.95019e-12	2.01638e-10	Down Regulated in Acute
ENSG00000196937.10	FAM3C	protein_coding	561.152	1.50741	0.21978	6.85871	6.94831e-12	2.01638e-10	Up Regulated in Acute
ENSG00000033170.16	FUT8	protein_coding	431.893	1.25313	0.182724	6.85804	6.98122e-12	2.02001e-10	Up Regulated in Acute
ENSG00000122966.13	CIT	protein_coding	143.691	2.60196	0.379422	6.85769	6.99826e-12	2.02001e-10	Up Regulated in Acute
ENSG00000152495.10	CAMK4	protein_coding	718.745	-1.32026	0.192521	-6.85774	6.99578e-12	2.02001e-10	Down Regulated in Acute
ENSG00000142583.17	SLC2A5	protein_coding	421.956	2.59184	0.378131	6.85435	7.16378e-12	2.06428e-10	Up Regulated in Acute
ENSG00000110324.9	IL10RA	protein_coding	10708.9	-1.13115	0.165045	-6.85359	7.20215e-12	2.06993e-10	Down Regulated in Acute
ENSG00000185760.15	KCNQ5	protein_coding	96.2471	1.33156	0.194289	6.85348	7.20767e-12	2.06993e-10	Up Regulated in Acute
ENSG00000106105.13	GARS	protein_coding	1914.99	1.22516	0.178831	6.85094	7.33672e-12	2.10344e-10	Up Regulated in Acute
ENSG00000153814.11	JAZF1	protein_coding	595.117	-1.28803	0.188065	-6.84885	7.44475e-12	2.13083e-10	Down Regulated in Acute
ENSG00000162430.16	SEPN1	protein_coding	729.272	-1.14454	0.167208	-6.84499	7.64815e-12	2.18537e-10	Down Regulated in Acute
ENSG00000099956.17	SMARCB1	protein_coding	1158.07	0.975933	0.142614	6.84319	7.74513e-12	2.20937e-10	Up Regulated in Acute
ENSG00000088992.17	TESC	protein_coding	367.919	-1.09734	0.160444	-6.83937	7.95398e-12	2.26516e-10	Down Regulated in Acute
ENSG00000166598.12	HSP90B1	protein_coding	38390.3	2.37749	0.347664	6.83849	8.00315e-12	2.27535e-10	Up Regulated in Acute
ENSG00000119969.14	HELLS	protein_coding	243.681	2.63204	0.38555	6.82672	8.68796e-12	2.46593e-10	Up Regulated in Acute
ENSG00000137502.9	RAB30	protein_coding	659.466	1.50656	0.220805	6.82304	8.91359e-12	2.52577e-10	Up Regulated in Acute
ENSG00000121211.7	MND1	protein_coding	62.5045	3.67394	0.538574	6.82162	9.00211e-12	2.54661e-10	Up Regulated in Acute
ENSG00000100034.13	PPM1F	protein_coding	1896.23	-1.29469	0.190291	-6.80375	1.01932e-11	2.87877e-10	Down Regulated in Acute
ENSG00000134001.12	EIF2S1	protein_coding	1240.24	1.25401	0.184449	6.79867	1.05592e-11	2.97721e-10	Up Regulated in Acute
ENSG00000108671.9	PSMD11	protein_coding	1460.29	0.644851	0.0949322	6.79275	1.10014e-11	3.09171e-10	Up Regulated in Acute
ENSG00000159461.14	AMFR	protein_coding	1218.21	-0.69923	0.102938	-6.79275	1.10016e-11	3.09171e-10	Down Regulated in Acute
ENSG00000122188.12	LAX1	protein_coding	725.913	2.09215	0.308223	6.78779	1.13866e-11	3.19464e-10	Up Regulated in Acute
ENSG00000121413.12	ZSCAN18	protein_coding	310.794	-1.34153	0.197658	-6.78715	1.14368e-11	3.20342e-10	Down Regulated in Acute
ENSG00000150907.6	FOXO1	protein_coding	822.468	-0.948399	0.139781	-6.78489	1.16176e-11	3.24873e-10	Down Regulated in Acute
ENSG00000007264.13	MATK	protein_coding	258.128	-1.58596	0.233965	-6.77862	1.21332e-11	3.38736e-10	Down Regulated in Acute
ENSG00000183691.4	NOG	protein_coding	48.4213	-3.48414	0.51405	-6.77783	1.21994e-11	3.40026e-10	Down Regulated in Acute
ENSG00000171791.11	BCL2	protein_coding	1185.88	-0.818297	0.120739	-6.77738	1.22377e-11	3.40536e-10	Down Regulated in Acute
ENSG00000131142.13	CCL25	protein_coding	13.7442	4.70049	0.693824	6.77476	1.24617e-11	3.46202e-10	Up Regulated in Acute
ENSG00000077984.5	CST7	protein_coding	1307.4	-1.20391	0.17775	-6.77308	1.26069e-11	3.49666e-10	Down Regulated in Acute
ENSG00000135074.15	ADAM19	protein_coding	2867.07	1.28082	0.189229	6.76863	1.30008e-11	3.60006e-10	Up Regulated in Acute
ENSG00000158321.15	AUTS2	protein_coding	237.797	-1.72104	0.254345	-6.76656	1.31882e-11	3.64603e-10	Down Regulated in Acute
ENSG00000168517.10	HEXIM2	protein_coding	75.5393	1.46688	0.216978	6.76051	1.37506e-11	3.79533e-10	Up Regulated in Acute
ENSG00000177733.6	HNRNPA0	protein_coding	1369.22	-0.678556	0.100395	-6.75887	1.39071e-11	3.83233e-10	Down Regulated in Acute
ENSG00000115902.10	SLC1A4	protein_coding	984.916	1.90647	0.282084	6.75853	1.39403e-11	3.83527e-10	Up Regulated in Acute
ENSG00000197457.9	STMN3	protein_coding	628.628	-1.42529	0.21091	-6.75783	1.40073e-11	3.8475e-10	Down Regulated in Acute
ENSG00000177426.20	TGIF1	protein_coding	456.644	-1.58082	0.233994	-6.7558	1.42046e-11	3.89539e-10	Down Regulated in Acute
ENSG00000064102.14	ASUN	protein_coding	524.181	1.08678	0.160917	6.75367	1.44154e-11	3.94684e-10	Up Regulated in Acute
ENSG00000092847.10	AGO1	protein_coding	1038.05	-0.695684	0.103066	-6.7499	1.47943e-11	4.04409e-10	Down Regulated in Acute
ENSG00000110871.14	COQ5	protein_coding	535.695	1.1692	0.173295	6.74688	1.51062e-11	4.12272e-10	Up Regulated in Acute
ENSG00000083720.12	OXCT1	protein_coding	819.75	1.31788	0.195536	6.73982	1.58588e-11	4.3212e-10	Up Regulated in Acute
ENSG00000198019.12	FCGR1B	protein_coding	488.213	2.07512	0.307955	6.73838	1.60161e-11	4.35711e-10	Up Regulated in Acute
ENSG00000184164.14	CRELD2	protein_coding	947.249	1.56251	0.231906	6.73772	1.60892e-11	4.36999e-10	Up Regulated in Acute
ENSG00000063241.7	ISOC2	protein_coding	289.091	1.7221	0.255782	6.73268	1.66569e-11	4.517e-10	Up Regulated in Acute
ENSG00000239713.7	APOBEC3G	protein_coding	2535.59	1.30298	0.19363	6.72919	1.70609e-11	4.6192e-10	Up Regulated in Acute
ENSG00000143179.12	UCK2	protein_coding	365.143	1.26267	0.187667	6.72826	1.717e-11	4.64134e-10	Up Regulated in Acute
ENSG00000170921.14	TANC2	protein_coding	206.757	-1.68112	0.249948	-6.72589	1.74521e-11	4.71013e-10	Down Regulated in Acute
ENSG00000077327.15	SPAG6	protein_coding	18.645	4.33856	0.645438	6.72187	1.79403e-11	4.83424e-10	Up Regulated in Acute
ENSG00000164611.12	PTTG1	protein_coding	599.752	2.48342	0.370058	6.71089	1.93442e-11	5.2043e-10	Up Regulated in Acute
ENSG00000198056.13	PRIM1	protein_coding	313.759	1.72265	0.256879	6.70608	1.99918e-11	5.37004e-10	Up Regulated in Acute
ENSG00000129810.14	SGOL1	protein_coding	76.0539	3.05114	0.455154	6.70354	2.03426e-11	5.45566e-10	Up Regulated in Acute
ENSG00000134285.10	FKBP11	protein_coding	1454.69	1.78143	0.265775	6.70277	2.045e-11	5.46725e-10	Up Regulated in Acute
ENSG00000137491.14	SLCO2B1	protein_coding	22.6367	4.15546	0.619957	6.70281	2.04444e-11	5.46725e-10	Up Regulated in Acute
ENSG00000188610.12	FAM72B	protein_coding	60.4166	2.83714	0.423477	6.69962	2.08967e-11	5.57791e-10	Up Regulated in Acute
ENSG00000223865.10	HLA-DPB1	protein_coding	11593	-1.17467	0.175547	-6.69149	2.20909e-11	5.88746e-10	Down Regulated in Acute
ENSG00000136492.8	BRIP1	protein_coding	87.6591	2.62916	0.393025	6.68954	2.23867e-11	5.95697e-10	Up Regulated in Acute
ENSG00000167861.15	HID1	protein_coding	154.013	1.87014	0.279617	6.68823	2.25893e-11	6.00149e-10	Up Regulated in Acute
ENSG00000121966.6	CXCR4	protein_coding	8369.02	-1.7236	0.257866	-6.6841	2.32343e-11	6.16325e-10	Down Regulated in Acute
ENSG00000128165.8	ADM2	protein_coding	32.5247	2.85284	0.426856	6.68338	2.33485e-11	6.1743e-10	Up Regulated in Acute
ENSG00000183742.12	MACC1	protein_coding	50.6561	2.58608	0.386938	6.68345	2.33375e-11	6.1743e-10	Up Regulated in Acute
ENSG00000103512.14	NOMO1	protein_coding	1190.59	1.29008	0.193036	6.68311	2.33916e-11	6.17611e-10	Up Regulated in Acute
ENSG00000055130.15	CUL1	protein_coding	2168.92	0.914845	0.137068	6.67439	2.48264e-11	6.5448e-10	Up Regulated in Acute
ENSG00000113368.11	LMNB1	protein_coding	1644.7	1.949	0.292675	6.65925	2.75221e-11	7.24421e-10	Up Regulated in Acute
ENSG00000174371.16	EXO1	protein_coding	145.916	3.54717	0.533346	6.6508	2.91511e-11	7.66116e-10	Up Regulated in Acute
ENSG00000198785.4	GRIN3A	protein_coding	69.6481	3.01756	0.453773	6.64993	2.93224e-11	7.69432e-10	Up Regulated in Acute
ENSG00000086065.13	CHMP5	protein_coding	1244.26	1.27957	0.192431	6.64949	2.94102e-11	7.70546e-10	Up Regulated in Acute
ENSG00000114626.17	ABTB1	protein_coding	1602.2	-1.08026	0.162583	-6.64433	3.04592e-11	7.96805e-10	Down Regulated in Acute
ENSG00000162804.13	SNED1	protein_coding	151.144	-1.85093	0.278868	-6.63729	3.19505e-11	8.34535e-10	Down Regulated in Acute
ENSG00000164109.13	MAD2L1	protein_coding	216.538	2.56228	0.386143	6.63557	3.23252e-11	8.4303e-10	Up Regulated in Acute
ENSG00000139112.10	GABARAPL1	protein_coding	811.01	-1.58088	0.238551	-6.62702	3.42523e-11	8.91922e-10	Down Regulated in Acute
ENSG00000106565.17	TMEM176B	protein_coding	1607.76	-1.22161	0.184523	-6.62033	3.58396e-11	9.3183e-10	Down Regulated in Acute
ENSG00000136810.12	TXN	protein_coding	2211.86	1.40258	0.211931	6.61812	3.63796e-11	9.44429e-10	Up Regulated in Acute
ENSG00000159228.12	CBR1	protein_coding	710.525	1.36899	0.206928	6.61575	3.69682e-11	1e-09	Up Regulated in Acute
ENSG00000102738.7	MRPS31	protein_coding	574.967	1.51833	0.229512	6.61545	3.70413e-11	1e-09	Up Regulated in Acute
ENSG00000049656.13	CLPTM1L	protein_coding	2249.14	1.43194	0.216644	6.60962	3.85302e-11	1e-09	Up Regulated in Acute
ENSG00000113615.12	SEC24A	protein_coding	914.212	2.34903	0.35544	6.6088	3.87444e-11	1e-09	Up Regulated in Acute
ENSG00000102096.9	PIM2	protein_coding	6803.07	1.83998	0.278562	6.60527	3.96799e-11	1e-09	Up Regulated in Acute
ENSG00000100100.12	PIK3IP1	protein_coding	2954.78	-1.57687	0.238774	-6.60402	4.00161e-11	1e-09	Down Regulated in Acute
ENSG00000127152.17	BCL11B	protein_coding	1130.4	-1.36275	0.20665	-6.59449	4.26714e-11	1.09607e-09	Down Regulated in Acute
ENSG00000113387.11	SUB1	protein_coding	8276.56	1.82062	0.276213	6.59134	4.35867e-11	1.11789e-09	Up Regulated in Acute
ENSG00000160957.12	RECQL4	protein_coding	187.574	2.60063	0.394574	6.59097	4.36961e-11	1.11901e-09	Up Regulated in Acute
ENSG00000029153.14	ARNTL2	protein_coding	95.3578	2.48115	0.376851	6.5839	4.58276e-11	1.17184e-09	Up Regulated in Acute
ENSG00000113319.11	RASGRF2	protein_coding	320.921	-1.55058	0.235924	-6.57237	4.95203e-11	1.26247e-09	Down Regulated in Acute
ENSG00000134333.13	LDHA	protein_coding	7730.75	1.09979	0.167335	6.57237	4.95191e-11	1.26247e-09	Up Regulated in Acute
ENSG00000172508.10	CARNS1	protein_coding	180.116	-1.80286	0.274619	-6.56494	5.20523e-11	1.32504e-09	Down Regulated in Acute
ENSG00000133872.13	SARAF	protein_coding	8243.4	-0.946596	0.144244	-6.56245	5.29292e-11	1.34535e-09	Down Regulated in Acute
ENSG00000196305.17	IARS	protein_coding	1783.7	1.18984	0.181419	6.5585	5.43521e-11	1.37946e-09	Up Regulated in Acute
ENSG00000181751.9	C5orf30	protein_coding	130.105	2.02013	0.30805	6.55781	5.46055e-11	1.38383e-09	Up Regulated in Acute
ENSG00000074842.7	MYDGF	protein_coding	2080.52	1.98587	0.302864	6.55698	5.49095e-11	1.38946e-09	Up Regulated in Acute
ENSG00000152465.17	NMT2	protein_coding	263.302	-1.20463	0.183864	-6.55173	5.68754e-11	1.43707e-09	Down Regulated in Acute
ENSG00000113070.7	HBEGF	protein_coding	304.072	-2.17765	0.332416	-6.55099	5.71581e-11	1.44208e-09	Down Regulated in Acute
ENSG00000008513.14	ST3GAL1	protein_coding	2570.32	-1.27376	0.194461	-6.55024	5.74438e-11	1.44714e-09	Down Regulated in Acute
ENSG00000187239.16	FNBP1	protein_coding	3154.84	-0.672659	0.102766	-6.54551	5.92927e-11	1.49151e-09	Down Regulated in Acute
ENSG00000151692.14	RNF144A	protein_coding	208.437	-1.48002	0.226162	-6.54407	5.98656e-11	1.50334e-09	Down Regulated in Acute
ENSG00000178057.14	NDUFAF3	protein_coding	533.875	0.847964	0.129581	6.54389	5.99393e-11	1.50334e-09	Up Regulated in Acute
ENSG00000114346.13	ECT2	protein_coding	183.327	2.25929	0.345573	6.53781	6.24247e-11	1.56337e-09	Up Regulated in Acute
ENSG00000168374.10	ARF4	protein_coding	2031.52	1.35326	0.207125	6.53351	6.42439e-11	1.60657e-09	Up Regulated in Acute
ENSG00000091436.16	pk	protein_coding	344.834	-1.29521	0.198307	-6.53134	6.51835e-11	1.62768e-09	Down Regulated in Acute
ENSG00000185088.12	RPS27L	protein_coding	1629.15	1.11846	0.171275	6.53017	6.56943e-11	1.63803e-09	Up Regulated in Acute
ENSG00000182481.8	KPNA2	protein_coding	1126.79	1.8862	0.288876	6.52945	6.60122e-11	1.64355e-09	Up Regulated in Acute
ENSG00000145365.10	TIFA	protein_coding	468.019	1.71689	0.263129	6.5249	6.80463e-11	1.68925e-09	Up Regulated in Acute
ENSG00000158717.10	RNF166	protein_coding	1805.28	-1.04781	0.160585	-6.52496	6.80199e-11	1.68925e-09	Down Regulated in Acute
ENSG00000005381.7	MPO	protein_coding	351.915	1.88525	0.289002	6.5233	6.8777e-11	1.70491e-09	Up Regulated in Acute
ENSG00000162298.16	SYVN1	protein_coding	1825.48	1.05804	0.162348	6.51709	7.16839e-11	1.77439e-09	Up Regulated in Acute
ENSG00000100095.18	SEZ6L	protein_coding	56.1281	-3.03835	0.466241	-6.51669	7.18775e-11	1.77659e-09	Down Regulated in Acute
ENSG00000013725.14	CD6	protein_coding	2574.5	-1.40443	0.215565	-6.51512	7.2632e-11	1.79264e-09	Down Regulated in Acute
ENSG00000153823.18	PID1	protein_coding	420.462	-2.50126	0.383992	-6.51383	7.32565e-11	1.80544e-09	Down Regulated in Acute
ENSG00000104980.7	TIMM44	protein_coding	383.277	0.889572	0.136672	6.50881	7.57475e-11	1.86413e-09	Up Regulated in Acute
ENSG00000117281.15	CD160	protein_coding	175.092	-1.9336	0.297315	-6.50354	7.8449e-11	1.92505e-09	Down Regulated in Acute
ENSG00000130518.16	KIAA1683	protein_coding	153.242	-2.17393	0.334258	-6.50374	7.83473e-11	1.92505e-09	Down Regulated in Acute
ENSG00000105516.10	DBP	protein_coding	177.85	-1.495	0.229903	-6.50276	7.88594e-11	1.93234e-09	Down Regulated in Acute
ENSG00000167483.17	FAM129C	protein_coding	782.575	-1.49436	0.229835	-6.50189	7.93182e-11	1.94079e-09	Down Regulated in Acute
ENSG00000152749.7	GPR180	protein_coding	269.757	0.928743	0.14293	6.49791	8.14437e-11	2e-09	Up Regulated in Acute
ENSG00000187109.13	NAP1L1	protein_coding	9109.77	-1.16582	0.179414	-6.49795	8.14222e-11	2e-09	Down Regulated in Acute
ENSG00000186810.7	CXCR3	protein_coding	307.018	1.82794	0.28136	6.49679	8.20508e-11	2e-09	Up Regulated in Acute
ENSG00000088881.20	EBF4	protein_coding	21.3006	-3.02814	0.466237	-6.49485	8.31168e-11	2e-09	Down Regulated in Acute
ENSG00000105643.9	ARRDC2	protein_coding	2287.92	-1.35451	0.20857	-6.49426	8.34447e-11	2e-09	Down Regulated in Acute
ENSG00000021300.13	PLEKHB1	protein_coding	243.305	-1.62564	0.250423	-6.49157	8.49449e-11	2.0607e-09	Down Regulated in Acute
ENSG00000168811.6	IL12A	protein_coding	69.6123	2.44571	0.37681	6.49058	8.55057e-11	2.07135e-09	Up Regulated in Acute
ENSG00000170633.16	RNF34	protein_coding	830.26	0.730908	0.112711	6.48479	8.88548e-11	2.14943e-09	Up Regulated in Acute
ENSG00000235750.9	KIAA0040	protein_coding	2272.46	1.02714	0.15842	6.48367	8.95156e-11	2.16234e-09	Up Regulated in Acute
ENSG00000111331.12	OAS3	protein_coding	5786.1	2.46529	0.380285	6.48273	9.00755e-11	2.17278e-09	Up Regulated in Acute
ENSG00000145431.10	PDGFC	protein_coding	82.7234	-2.48291	0.38325	-6.47856	9.26029e-11	2.23059e-09	Down Regulated in Acute
ENSG00000160791.13	CCR5	protein_coding	958.289	1.49049	0.230154	6.47604	9.41629e-11	2.26495e-09	Up Regulated in Acute
ENSG00000171992.12	SYNPO	protein_coding	63.7852	-2.08209	0.321517	-6.47583	9.42953e-11	2.26495e-09	Down Regulated in Acute
ENSG00000154027.18	AK5	protein_coding	97.4375	-2.31576	0.357726	-6.47357	9.57143e-11	2.29257e-09	Down Regulated in Acute
ENSG00000170647.3	TMEM133	protein_coding	39.5851	3.06943	0.474142	6.47366	9.56592e-11	2.29257e-09	Up Regulated in Acute
ENSG00000143333.6	RGS16	protein_coding	60.2021	3.29816	0.50962	6.47179	9.68468e-11	2.31643e-09	Up Regulated in Acute
ENSG00000149212.10	SESN3	protein_coding	1073.57	-1.37129	0.211903	-6.4713	9.71607e-11	2.32068e-09	Down Regulated in Acute
ENSG00000169288.17	MRPL1	protein_coding	444.778	1.15739	0.178916	6.4689	9.8718e-11	2.35458e-09	Up Regulated in Acute
ENSG00000167461.11	RAB8A	protein_coding	2202.81	0.715839	0.110663	6.46861	9.89102e-11	2.35586e-09	Up Regulated in Acute
ENSG00000065911.11	MTHFD2	protein_coding	1521.47	1.38714	0.2145	6.46685	1.00068e-10	2.38011e-09	Up Regulated in Acute
ENSG00000129484.13	PARP2	protein_coding	435.714	1.44884	0.224064	6.46619	1.00505e-10	2.38718e-09	Up Regulated in Acute
ENSG00000107742.12	SPOCK2	protein_coding	3655.61	-1.41761	0.219292	-6.4645	1.01632e-10	2.41058e-09	Down Regulated in Acute
ENSG00000120526.10	NUDCD1	protein_coding	252.798	1.24284	0.192371	6.46064	1.04263e-10	2.46954e-09	Up Regulated in Acute
ENSG00000135624.15	CCT7	protein_coding	3082.63	0.934872	0.144745	6.45873	1.05583e-10	2.49733e-09	Up Regulated in Acute
ENSG00000049239.12	H6PD	protein_coding	1038.11	-1.07161	0.165926	-6.45832	1.05868e-10	2.50061e-09	Down Regulated in Acute
ENSG00000143185.3	XCL2	protein_coding	115.455	-1.64896	0.25586	-6.44477	1.15776e-10	2.73083e-09	Down Regulated in Acute
ENSG00000165244.6	ZNF367	protein_coding	100.141	1.81025	0.281091	6.44008	1.19414e-10	2.81275e-09	Up Regulated in Acute
ENSG00000179115.10	FARSA	protein_coding	709.869	1.15885	0.180248	6.42919	1.28282e-10	3e-09	Up Regulated in Acute
ENSG00000134575.9	ACP2	protein_coding	760.323	1.08136	0.16833	6.42403	1.32714e-10	3.11741e-09	Up Regulated in Acute
ENSG00000144504.15	ANKMY1	protein_coding	427.977	-0.977117	0.152124	-6.42316	1.3347e-10	3.12653e-09	Down Regulated in Acute
ENSG00000144591.17	GMPPA	protein_coding	1331.36	1.17648	0.183157	6.42333	1.33329e-10	3.12653e-09	Up Regulated in Acute
ENSG00000169925.16	BRD3	protein_coding	533.669	-1.12368	0.175001	-6.42098	1.35397e-10	3.16732e-09	Down Regulated in Acute
ENSG00000186265.9	BTLA	protein_coding	428.172	1.33648	0.208178	6.41989	1.36372e-10	3.18576e-09	Up Regulated in Acute
ENSG00000100412.15	ACO2	protein_coding	1901.32	0.828796	0.129109	6.41935	1.36854e-10	3.19264e-09	Up Regulated in Acute
ENSG00000115364.13	MRPL19	protein_coding	382.991	1.02543	0.15983	6.41574	1.40141e-10	3.26484e-09	Up Regulated in Acute
ENSG00000198794.11	SCAMP5	protein_coding	287.988	1.4861	0.23181	6.41084	1.44719e-10	3.3669e-09	Up Regulated in Acute
ENSG00000156876.9	SASS6	protein_coding	131.356	1.47189	0.229608	6.41045	1.4509e-10	3.37091e-09	Up Regulated in Acute
ENSG00000196550.10	FAM72A	protein_coding	53.0711	2.25795	0.352257	6.40997	1.45552e-10	3.37705e-09	Up Regulated in Acute
ENSG00000123095.5	BHLHE41	protein_coding	83.8691	2.18714	0.341612	6.40241	1.52942e-10	3.54368e-09	Up Regulated in Acute
ENSG00000214688.4	C10orf105	protein_coding	79.9952	-1.48083	0.231353	-6.40074	1.54629e-10	3.57789e-09	Down Regulated in Acute
ENSG00000133067.17	LGR6	protein_coding	159.707	-2.61757	0.409056	-6.39907	1.56328e-10	3.61231e-09	Down Regulated in Acute
ENSG00000180198.15	RCC1	protein_coding	571.2	1.11728	0.17462	6.39835	1.57067e-10	3.62447e-09	Up Regulated in Acute
ENSG00000111886.10	GABRR2	protein_coding	65.2659	2.06186	0.322283	6.39769	1.57747e-10	3.63523e-09	Up Regulated in Acute
ENSG00000221829.9	FANCG	protein_coding	458.053	1.87969	0.293951	6.39458	1.60993e-10	3.70502e-09	Up Regulated in Acute
ENSG00000137713.15	PPP2R1B	protein_coding	467.628	0.742085	0.116082	6.39275	1.6293e-10	3.74453e-09	Up Regulated in Acute
ENSG00000137563.11	GGH	protein_coding	384.086	3.4965	0.546986	6.39231	1.63399e-10	3.75026e-09	Up Regulated in Acute
ENSG00000070756.13	PABPC1	protein_coding	22661.4	-0.739988	0.115779	-6.39141	1.64363e-10	3.76235e-09	Down Regulated in Acute
ENSG00000160856.20	FCRL3	protein_coding	989.762	-1.20227	0.188107	-6.39141	1.64368e-10	3.76235e-09	Down Regulated in Acute
ENSG00000102760.12	RGCC	protein_coding	386.762	-1.20644	0.188811	-6.38965	1.66262e-10	3.80058e-09	Down Regulated in Acute
ENSG00000213889.10	PPM1N	protein_coding	84.5381	-1.69547	0.265454	-6.38707	1.69099e-10	3.86026e-09	Down Regulated in Acute
ENSG00000175115.11	PACS1	protein_coding	1785.29	-1.21328	0.190038	-6.38441	1.72056e-10	3.92251e-09	Down Regulated in Acute
ENSG00000109099.13	PMP22	protein_coding	23.1941	-3.36802	0.527735	-6.38204	1.74744e-10	4e-09	Down Regulated in Acute
ENSG00000131355.14	ADGRE3	protein_coding	178.185	-2.98651	0.468039	-6.38091	1.76036e-10	4e-09	Down Regulated in Acute
ENSG00000161888.11	SPC24	protein_coding	117.839	2.93938	0.460658	6.38084	1.76122e-10	4e-09	Up Regulated in Acute
ENSG00000153885.14	KCTD15	protein_coding	195.53	-1.27154	0.199454	-6.37511	1.82835e-10	4.14604e-09	Down Regulated in Acute
ENSG00000170486.10	KRT72	protein_coding	269.002	-1.8535	0.290749	-6.37489	1.8309e-10	4.14631e-09	Down Regulated in Acute
ENSG00000130684.13	ZNF337	protein_coding	819.076	-0.719249	0.112907	-6.37027	1.88696e-10	4.2676e-09	Down Regulated in Acute
ENSG00000161791.13	FMNL3	protein_coding	641.266	-1.27798	0.200645	-6.36938	1.89791e-10	4.28665e-09	Down Regulated in Acute
ENSG00000133740.10	E2F5	protein_coding	333.159	2.21186	0.347333	6.36814	1.9133e-10	4.31569e-09	Up Regulated in Acute
ENSG00000196465.10	MYL6B	protein_coding	280.386	1.88732	0.296385	6.3678	1.91759e-10	4.31965e-09	Up Regulated in Acute
ENSG00000177556.11	ATOX1	protein_coding	992.768	1.04775	0.16461	6.36504	1.9524e-10	4.39225e-09	Up Regulated in Acute
ENSG00000135679.21	MDM2	protein_coding	1922.31	1.01712	0.15982	6.36416	1.96356e-10	4.41153e-09	Up Regulated in Acute
ENSG00000124098.9	FAM210B	protein_coding	648.013	-1.32899	0.209009	-6.35855	2.0367e-10	4.56984e-09	Down Regulated in Acute
ENSG00000166783.19	KIAA0430	protein_coding	2135.4	-0.595545	0.0936774	-6.35741	2.0519e-10	4.59788e-09	Down Regulated in Acute
ENSG00000110917.7	MLEC	protein_coding	2603.43	1.18779	0.186856	6.35673	2.0609e-10	4.61198e-09	Up Regulated in Acute
ENSG00000168229.3	PTGDR	protein_coding	111.424	-2.57006	0.404345	-6.35609	2.06955e-10	4.62526e-09	Down Regulated in Acute
ENSG00000168066.20	SF1	protein_coding	5615	-0.98392	0.154818	-6.35534	2.0796e-10	4.64162e-09	Down Regulated in Acute
ENSG00000138642.14	HERC6	protein_coding	996.88	1.70628	0.268496	6.35494	2.08506e-10	4.64773e-09	Up Regulated in Acute
ENSG00000040275.16	SPDL1	protein_coding	271.01	1.58378	0.2493	6.35291	2.11279e-10	4.69921e-09	Up Regulated in Acute
ENSG00000056558.10	TRAF1	protein_coding	1351.24	-1.19925	0.188774	-6.35285	2.11368e-10	4.69921e-09	Down Regulated in Acute
ENSG00000105520.10	LPPR2	protein_coding	636.119	-1.48405	0.233613	-6.35262	2.11685e-10	4.70012e-09	Down Regulated in Acute
ENSG00000087258.13	GNAO1	protein_coding	34.1535	-2.62434	0.413189	-6.35144	2.13303e-10	4.72988e-09	Down Regulated in Acute
ENSG00000165102.14	HGSNAT	protein_coding	974.346	-1.32508	0.208659	-6.35043	2.14717e-10	4.75505e-09	Down Regulated in Acute
ENSG00000145979.17	TBC1D7	protein_coding	215.002	1.14338	0.180088	6.34899	2.16729e-10	4.79337e-09	Up Regulated in Acute
ENSG00000136244.11	IL6	protein_coding	53.154	2.76651	0.435824	6.34776	2.18477e-10	4.82577e-09	Up Regulated in Acute
ENSG00000240065.7	PSMB9	protein_coding	3967.16	0.945651	0.149032	6.34527	2.22031e-10	4.89791e-09	Up Regulated in Acute
ENSG00000167004.12	PDIA3	protein_coding	8115.61	0.875705	0.138035	6.34408	2.2376e-10	4.92966e-09	Up Regulated in Acute
ENSG00000102572.14	STK24	protein_coding	2334.26	-0.639421	0.100804	-6.34322	2.25015e-10	5e-09	Down Regulated in Acute
ENSG00000196230.12	TUBB	protein_coding	7245.12	1.40845	0.222086	6.34192	2.2692e-10	5e-09	Up Regulated in Acute
ENSG00000100600.14	LGMN	protein_coding	371.443	1.64391	0.259366	6.33818	2.32498e-10	5.10237e-09	Up Regulated in Acute
ENSG00000069702.10	TGFBR3	protein_coding	589.998	-1.57208	0.248236	-6.333	2.4044e-10	5.26988e-09	Down Regulated in Acute
ENSG00000058453.16	CROCC	protein_coding	210.531	-1.13006	0.178468	-6.33202	2.4198e-10	5.29681e-09	Down Regulated in Acute
ENSG00000168685.14	IL7R	protein_coding	8312.8	-1.19015	0.188085	-6.32772	2.48805e-10	5.43922e-09	Down Regulated in Acute
ENSG00000115687.13	PASK	protein_coding	794.9	-1.01906	0.161053	-6.32746	2.49225e-10	5.44142e-09	Down Regulated in Acute
ENSG00000075420.12	FNDC3B	protein_coding	1011.83	1.34591	0.212874	6.32258	2.57237e-10	5.60915e-09	Up Regulated in Acute
ENSG00000073111.13	MCM2	protein_coding	675.594	2.45424	0.388316	6.32021	2.61213e-10	5.68856e-09	Up Regulated in Acute
ENSG00000100811.10	YY1	protein_coding	2155.21	-0.678859	0.107434	-6.31886	2.63498e-10	5.73099e-09	Down Regulated in Acute
ENSG00000185436.11	IFNLR1	protein_coding	174.126	1.99414	0.31566	6.31737	2.66052e-10	5.77918e-09	Up Regulated in Acute
ENSG00000163235.15	TGFA	protein_coding	46.6706	-2.49918	0.395715	-6.31561	2.69104e-10	5.83802e-09	Down Regulated in Acute
ENSG00000172543.7	CTSW	protein_coding	2258.76	-1.34256	0.212585	-6.3154	2.69467e-10	5.83844e-09	Down Regulated in Acute
ENSG00000114054.13	PCCB	protein_coding	500.04	0.957733	0.151673	6.31447	2.71092e-10	5.86619e-09	Up Regulated in Acute
ENSG00000186603.5	HPDL	protein_coding	37.3951	3.44859	0.546312	6.31249	2.74579e-10	5.93412e-09	Up Regulated in Acute
ENSG00000109906.13	ZBTB16	protein_coding	71.4055	-1.83562	0.290835	-6.31155	2.76259e-10	6e-09	Down Regulated in Acute
ENSG00000082512.14	TRAF5	protein_coding	1173.45	-0.945968	0.150023	-6.30549	2.87275e-10	6.19278e-09	Down Regulated in Acute
ENSG00000213047.11	DENND1B	protein_coding	472.813	1.00113	0.158867	6.30167	2.94451e-10	6.33945e-09	Up Regulated in Acute
ENSG00000187240.13	DYNC2H1	protein_coding	55.0981	-1.76757	0.280556	-6.30025	2.97157e-10	6.38963e-09	Down Regulated in Acute
ENSG00000007516.13	BAIAP3	protein_coding	114.963	-1.79135	0.28444	-6.2978	3.01904e-10	6.48352e-09	Down Regulated in Acute
ENSG00000053918.15	KCNQ1	protein_coding	514.83	-1.06064	0.168436	-6.29703	3.03401e-10	6.50746e-09	Down Regulated in Acute
ENSG00000174738.12	NR1D2	protein_coding	588.964	-1.79865	0.285703	-6.29553	3.06359e-10	6.56263e-09	Down Regulated in Acute
ENSG00000221866.9	PLXNA4	protein_coding	58.1775	-2.40234	0.381649	-6.29462	3.08147e-10	6.59265e-09	Down Regulated in Acute
ENSG00000160094.14	ZNF362	protein_coding	372.646	-1.14697	0.18224	-6.29371	3.0996e-10	6.62311e-09	Down Regulated in Acute
ENSG00000116120.9	FARSB	protein_coding	718.415	1.00246	0.159306	6.29268	3.12033e-10	6.65397e-09	Up Regulated in Acute
ENSG00000136628.17	EPRS	protein_coding	2384.05	1.13123	0.179772	6.2926	3.12186e-10	6.65397e-09	Up Regulated in Acute
ENSG00000049247.13	UTS2	protein_coding	19.134	-2.49222	0.396639	-6.28334	3.31371e-10	7.05405e-09	Down Regulated in Acute
ENSG00000170275.14	CRTAP	protein_coding	2850.76	-0.913839	0.145476	-6.28172	3.34849e-10	7.11919e-09	Down Regulated in Acute
ENSG00000138439.11	FAM117B	protein_coding	304.2	-1.10675	0.176233	-6.28005	3.38472e-10	7.18725e-09	Down Regulated in Acute
ENSG00000179833.4	SERTAD2	protein_coding	1011.65	-1.21072	0.192919	-6.27579	3.47869e-10	7.3776e-09	Down Regulated in Acute
ENSG00000128578.9	STRIP2	protein_coding	34.088	2.35622	0.375526	6.27445	3.50872e-10	7.43203e-09	Up Regulated in Acute
ENSG00000122218.14	COPA	protein_coding	3843.14	1.00326	0.160248	6.26068	3.83309e-10	8.109e-09	Up Regulated in Acute
ENSG00000161640.15	SIGLEC11	protein_coding	111.013	2.55586	0.408285	6.26	3.84977e-10	8.13419e-09	Up Regulated in Acute
ENSG00000100749.7	VRK1	protein_coding	574.923	1.28152	0.204727	6.25967	3.85799e-10	8.14147e-09	Up Regulated in Acute
ENSG00000186818.12	LILRB4	protein_coding	1812.75	1.33373	0.213245	6.25446	3.98899e-10	8.40748e-09	Up Regulated in Acute
ENSG00000105854.12	PON2	protein_coding	262.355	-1.15518	0.184721	-6.25363	4.0102e-10	8.44173e-09	Down Regulated in Acute
ENSG00000120915.13	EPHX2	protein_coding	290.846	-1.19692	0.191531	-6.2492	4.12548e-10	8.6737e-09	Down Regulated in Acute
ENSG00000138772.12	ANXA3	protein_coding	16.4806	3.47023	0.555373	6.24847	4.14499e-10	8.70398e-09	Up Regulated in Acute
ENSG00000101194.17	SLC17A9	protein_coding	600.938	1.58189	0.25321	6.24734	4.17491e-10	8.75599e-09	Up Regulated in Acute
ENSG00000122591.11	FAM126A	protein_coding	662.373	1.12901	0.180744	6.24646	4.19848e-10	8.7946e-09	Up Regulated in Acute
ENSG00000196684.12	HSH2D	protein_coding	3582.41	1.15133	0.184328	6.24611	4.20809e-10	8.80389e-09	Up Regulated in Acute
ENSG00000038210.12	PI4K2B	protein_coding	345.43	1.79422	0.287492	6.24095	4.34931e-10	9.08819e-09	Up Regulated in Acute
ENSG00000109685.17	WHSC1	protein_coding	1265.27	0.864743	0.138632	6.23768	4.44116e-10	9.26874e-09	Up Regulated in Acute
ENSG00000128965.11	CHAC1	protein_coding	40.6538	3.49679	0.560934	6.23387	4.55055e-10	9.47382e-09	Up Regulated in Acute
ENSG00000154814.13	OXNAD1	protein_coding	679.502	-0.866832	0.139048	-6.23405	4.54536e-10	9.47382e-09	Down Regulated in Acute
ENSG00000137168.7	PPIL1	protein_coding	340.621	1.40306	0.225106	6.23291	4.57861e-10	9.5206e-09	Up Regulated in Acute
ENSG00000068912.13	ERLEC1	protein_coding	1679.39	1.64802	0.264464	6.23156	4.61816e-10	9.59113e-09	Up Regulated in Acute
ENSG00000244038.9	DDOST	protein_coding	4720.52	1.33679	0.2146	6.22922	4.6877e-10	9.7237e-09	Up Regulated in Acute
ENSG00000099622.13	CIRBP	protein_coding	4986.17	-0.671845	0.107889	-6.22718	4.74893e-10	9.83871e-09	Down Regulated in Acute
ENSG00000123453.16	SARDH	protein_coding	31.453	-2.2571	0.362551	-6.2256	4.79702e-10	9.92627e-09	Down Regulated in Acute
ENSG00000104635.13	SLC39A14	protein_coding	225.424	2.27505	0.365543	6.22375	4.85415e-10	1e-08	Up Regulated in Acute
ENSG00000167470.12	MIDN	protein_coding	1082.28	-1.22148	0.196271	-6.22341	4.86478e-10	1e-08	Down Regulated in Acute
ENSG00000106341.10	PPP1R17	protein_coding	24.7858	-4.15515	0.667714	-6.22295	4.87885e-10	1.00589e-08	Down Regulated in Acute
ENSG00000132170.19	PPARG	protein_coding	45.9392	2.20917	0.355115	6.22101	4.93966e-10	1.0172e-08	Up Regulated in Acute
ENSG00000166016.5	ABTB2	protein_coding	81.845	2.69047	0.4328	6.21644	5.08575e-10	1.04602e-08	Up Regulated in Acute
ENSG00000148660.20	CAMK2G	protein_coding	1097	-0.894452	0.143932	-6.2144	5.15214e-10	1.05839e-08	Down Regulated in Acute
ENSG00000184840.11	TMED9	protein_coding	2834.3	1.13893	0.183347	6.21186	5.23606e-10	1.07363e-08	Up Regulated in Acute
ENSG00000198754.5	OXCT2	protein_coding	20.8424	3.06783	0.493873	6.21178	5.23892e-10	1.07363e-08	Up Regulated in Acute
ENSG00000055332.16	EIF2AK2	protein_coding	1958.04	1.61584	0.260189	6.21024	5.29052e-10	1.0829e-08	Up Regulated in Acute
ENSG00000116729.13	WLS	protein_coding	193.073	-1.92365	0.30986	-6.20814	5.3617e-10	1.1e-08	Down Regulated in Acute
ENSG00000014641.17	MDH1	protein_coding	2133.02	0.911921	0.146973	6.20468	5.48089e-10	1.11784e-08	Up Regulated in Acute
ENSG00000154277.12	UCHL1	protein_coding	80.2669	6.21211	1.00119	6.20474	5.47872e-10	1.11784e-08	Up Regulated in Acute
ENSG00000101911.12	PRPS2	protein_coding	498.308	0.977887	0.157631	6.20366	5.5166e-10	1.12378e-08	Up Regulated in Acute
ENSG00000087502.17	ERGIC2	protein_coding	666.466	1.4544	0.234538	6.20115	5.60533e-10	1.13998e-08	Up Regulated in Acute
ENSG00000159733.13	ZFYVE28	protein_coding	226.396	-1.33256	0.214893	-6.20103	5.60955e-10	1.13998e-08	Down Regulated in Acute
ENSG00000126457.20	PRMT1	protein_coding	1218.03	0.995215	0.160594	6.19708	5.75204e-10	1.1667e-08	Up Regulated in Acute
ENSG00000184613.10	NELL2	protein_coding	698.35	-2.08574	0.336572	-6.19701	5.7547e-10	1.1667e-08	Down Regulated in Acute
ENSG00000132541.10	HRSP12	protein_coding	143.594	1.32517	0.213944	6.19401	5.86526e-10	1.1877e-08	Up Regulated in Acute
ENSG00000153234.13	NR4A2	protein_coding	477.58	-2.77755	0.449072	-6.1851	6.20638e-10	1.25528e-08	Down Regulated in Acute
ENSG00000089006.16	SNX5	protein_coding	2585.88	0.688192	0.111277	6.18449	6.2302e-10	1.2586e-08	Up Regulated in Acute
ENSG00000163319.10	MRPS18C	protein_coding	627.555	1.31092	0.212034	6.18261	6.30506e-10	1.27222e-08	Up Regulated in Acute
ENSG00000184640.17	SEPT9	protein_coding	5885.94	-0.834056	0.13491	-6.18233	6.31629e-10	1.27298e-08	Down Regulated in Acute
ENSG00000094914.12	AAAS	protein_coding	1101.59	0.816723	0.132125	6.18143	6.35234e-10	1.27873e-08	Up Regulated in Acute
ENSG00000168824.14	D4S234E	protein_coding	180.484	-1.97879	0.320184	-6.18017	6.40341e-10	1.28749e-08	Down Regulated in Acute
ENSG00000069966.18	GNB5	protein_coding	291.981	-0.686546	0.111108	-6.17906	6.44839e-10	1.3e-08	Down Regulated in Acute
ENSG00000152689.17	RASGRP3	protein_coding	752.776	2.27211	0.367806	6.17745	6.51439e-10	1.30671e-08	Up Regulated in Acute
ENSG00000033867.16	SLC4A7	protein_coding	607.644	-1.26977	0.205561	-6.17712	6.52803e-10	1.30791e-08	Down Regulated in Acute
ENSG00000092051.16	JPH4	protein_coding	89.0592	2.61121	0.422798	6.17601	6.574e-10	1.31557e-08	Up Regulated in Acute
ENSG00000173207.12	CKS1B	protein_coding	303.933	1.79155	0.290177	6.17397	6.65944e-10	1.33111e-08	Up Regulated in Acute
ENSG00000172115.8	CYCS	protein_coding	1541.5	1.63505	0.264895	6.17245	6.72409e-10	1.34245e-08	Up Regulated in Acute
ENSG00000099995.18	SF3A1	protein_coding	2355.73	-0.672541	0.108985	-6.17093	6.78884e-10	1.353e-08	Down Regulated in Acute
ENSG00000173611.17	SCAI	protein_coding	165.224	-1.01412	0.164341	-6.17084	6.79279e-10	1.353e-08	Down Regulated in Acute
ENSG00000107341.4	UBE2R2	protein_coding	2083.86	-0.909652	0.147421	-6.17042	6.81096e-10	1.35503e-08	Down Regulated in Acute
ENSG00000166123.13	GPT2	protein_coding	153.446	2.06943	0.33551	6.16801	6.91557e-10	1.37424e-08	Up Regulated in Acute
ENSG00000137936.16	BCAR3	protein_coding	43.9632	2.18087	0.353596	6.16769	6.92969e-10	1.37544e-08	Up Regulated in Acute
ENSG00000132109.9	TRIM21	protein_coding	1388.01	1.26873	0.205715	6.16743	6.94101e-10	1.37608e-08	Up Regulated in Acute
ENSG00000149554.12	CHEK1	protein_coding	273.294	2.83309	0.459427	6.16657	6.97881e-10	1.38197e-08	Up Regulated in Acute
ENSG00000135678.11	CPM	protein_coding	149.672	-1.49978	0.243228	-6.16615	6.99746e-10	1.38405e-08	Down Regulated in Acute
ENSG00000164087.7	POC1A	protein_coding	147.257	2.16149	0.3506	6.16512	7.04308e-10	1.39146e-08	Up Regulated in Acute
ENSG00000126353.3	CCR7	protein_coding	1681.1	-1.21133	0.196529	-6.1636	7.11078e-10	1.4e-08	Down Regulated in Acute
ENSG00000140443.13	IGF1R	protein_coding	329.602	-1.68099	0.272779	-6.16246	7.16249e-10	1.41177e-08	Down Regulated in Acute
ENSG00000176208.8	ATAD5	protein_coding	177.817	1.49496	0.242821	6.15664	7.43067e-10	1.46294e-08	Up Regulated in Acute
ENSG00000197880.8	MDS2	protein_coding	70.0141	-2.30167	0.373881	-6.15615	7.4535e-10	1.46574e-08	Down Regulated in Acute
ENSG00000198130.14	HIBCH	protein_coding	484.366	1.89442	0.307984	6.15105	7.69728e-10	1.51193e-08	Up Regulated in Acute
ENSG00000028137.16	TNFRSF1B	protein_coding	11881.4	-1.13423	0.184446	-6.14941	7.77723e-10	1.52425e-08	Down Regulated in Acute
ENSG00000171206.13	TRIM8	protein_coding	1458.71	-0.931818	0.15153	-6.1494	7.7779e-10	1.52425e-08	Down Regulated in Acute
ENSG00000101187.15	SLCO4A1	protein_coding	77.8158	2.66503	0.433646	6.14564	7.96436e-10	1.559e-08	Up Regulated in Acute
ENSG00000164985.14	PSIP1	protein_coding	1336.34	-0.633672	0.103175	-6.14171	8.16399e-10	1.6e-08	Down Regulated in Acute
ENSG00000169122.11	FAM110B	protein_coding	71.5096	-2.36654	0.385345	-6.14135	8.18216e-10	1.6e-08	Down Regulated in Acute
ENSG00000175544.13	CABP4	protein_coding	43.5532	-2.83437	0.461602	-6.14029	8.23701e-10	1.60683e-08	Down Regulated in Acute
ENSG00000145020.14	AMT	protein_coding	416.977	-0.840209	0.136946	-6.13533	8.49839e-10	1.65592e-08	Down Regulated in Acute
ENSG00000176928.5	GCNT4	protein_coding	153.909	-1.61972	0.264446	-6.12497	9.07034e-10	1.76535e-08	Down Regulated in Acute
ENSG00000117602.11	RCAN3	protein_coding	1185.56	-1.31402	0.214622	-6.12247	9.21348e-10	1.79116e-08	Down Regulated in Acute
ENSG00000110074.10	FOXRED1	protein_coding	578.358	1.09067	0.178276	6.11788	9.48281e-10	1.84142e-08	Up Regulated in Acute
ENSG00000198722.12	UNC13B	protein_coding	158.575	2.4386	0.398766	6.11536	1e-09	1.86868e-08	Up Regulated in Acute
ENSG00000129195.15	FAM64A	protein_coding	19.2795	3.7679	0.617283	6.10401	1e-09	2e-08	Up Regulated in Acute
ENSG00000162734.12	PEA15	protein_coding	2358.58	-1.02472	0.167872	-6.10414	1e-09	2e-08	Down Regulated in Acute
ENSG00000187951.10	ARHGAP11B	protein_coding	170.43	1.52219	0.249373	6.10405	1e-09	2e-08	Up Regulated in Acute
ENSG00000181938.13	GINS3	protein_coding	123.787	2.09806	0.343967	6.09959	1.06342e-09	2.05329e-08	Up Regulated in Acute
ENSG00000170873.18	MTSS1	protein_coding	1190.45	-1.45205	0.238124	-6.09787	1.07491e-09	2.07312e-08	Down Regulated in Acute
ENSG00000132591.11	ERAL1	protein_coding	744.099	0.822116	0.134856	6.09624	1.08594e-09	2.09203e-08	Up Regulated in Acute
ENSG00000125148.6	MT2A	protein_coding	1358.01	1.82958	0.300131	6.09594	1.08795e-09	2.09353e-08	Up Regulated in Acute
ENSG00000044574.7	HSPA5	protein_coding	15996.4	1.6618	0.272636	6.09531	1.09226e-09	2.1e-08	Up Regulated in Acute
ENSG00000140284.10	SLC27A2	protein_coding	36.2891	2.85766	0.468908	6.09429	1.09924e-09	2.1105e-08	Up Regulated in Acute
ENSG00000275302.1	CCL4	protein_coding	611.663	-1.64023	0.269183	-6.09336	1.10562e-09	2.12035e-08	Down Regulated in Acute
ENSG00000171476.21	HOPX	protein_coding	463.652	-1.81561	0.298058	-6.09147	1.11879e-09	2.14318e-08	Down Regulated in Acute
ENSG00000116830.11	TTF2	protein_coding	504.442	1.07325	0.176228	6.09012	1.12829e-09	2.15896e-08	Up Regulated in Acute
ENSG00000141384.11	TAF4B	protein_coding	235.153	1.54891	0.254624	6.08314	1.17854e-09	2.25258e-08	Up Regulated in Acute
ENSG00000144824.19	PHLDB2	protein_coding	56.6654	-1.6931	0.2784	-6.08154	1.19033e-09	2.27257e-08	Down Regulated in Acute
ENSG00000162972.10	C2orf47	protein_coding	185.698	1.236	0.203274	6.08046	1.19839e-09	2.28539e-08	Up Regulated in Acute
ENSG00000198756.10	COLGALT2	protein_coding	36.9046	-2.62196	0.431333	-6.07874	1.21131e-09	2.30745e-08	Down Regulated in Acute
ENSG00000094880.10	CDC23	protein_coding	625.917	0.591314	0.0973006	6.07719	1.22309e-09	2.32729e-08	Up Regulated in Acute
ENSG00000198851.9	CD3E	protein_coding	3920.9	-1.0496	0.172751	-6.07578	1.23385e-09	2.34514e-08	Down Regulated in Acute
ENSG00000075188.8	NUP37	protein_coding	492.005	1.23832	0.203941	6.07198	1.26343e-09	2.4e-08	Up Regulated in Acute
ENSG00000136518.16	ACTL6A	protein_coding	666.914	1.04225	0.171656	6.07171	1.26553e-09	2.4e-08	Up Regulated in Acute
ENSG00000139718.10	SETD1B	protein_coding	939.802	-1.01123	0.166543	-6.07187	1.26431e-09	2.4e-08	Down Regulated in Acute
ENSG00000180535.3	BHLHA15	protein_coding	24.8046	4.93564	0.812929	6.07143	1.26776e-09	2.4e-08	Up Regulated in Acute
ENSG00000171223.5	JUNB	protein_coding	1555.38	-1.26858	0.208999	-6.06978	1.28089e-09	2.42104e-08	Down Regulated in Acute
ENSG00000131196.17	NFATC1	protein_coding	499.71	-1.13303	0.186916	-6.06171	1.34683e-09	2.54285e-08	Down Regulated in Acute
ENSG00000130997.16	POLN	protein_coding	34.6605	2.22151	0.366512	6.06124	1.3508e-09	2.54752e-08	Up Regulated in Acute
ENSG00000167895.14	TMC8	protein_coding	5717.27	-1.15427	0.190506	-6.05894	1.37018e-09	2.58122e-08	Down Regulated in Acute
ENSG00000188177.13	ZC3H6	protein_coding	315.329	-1.10977	0.183206	-6.05751	1.38248e-09	2.6e-08	Down Regulated in Acute
ENSG00000061656.9	SPAG4	protein_coding	38.8934	2.7468	0.453521	6.05661	1.39018e-09	2.6131e-08	Up Regulated in Acute
ENSG00000167642.12	SPINT2	protein_coding	543.465	-1.00966	0.166725	-6.05583	1.39694e-09	2.62292e-08	Down Regulated in Acute
ENSG00000161800.12	RACGAP1	protein_coding	479.337	1.95838	0.32359	6.05206	1.43008e-09	2.68219e-08	Up Regulated in Acute
ENSG00000146674.14	IGFBP3	protein_coding	94.6843	-1.89752	0.313805	-6.04679	1.47757e-09	2.76821e-08	Down Regulated in Acute
ENSG00000082438.15	COBLL1	protein_coding	465.344	2.12027	0.350723	6.04542	1.49021e-09	2.78882e-08	Up Regulated in Acute
ENSG00000134755.14	DSC2	protein_coding	97.2645	-1.87021	0.309578	-6.04117	1.52999e-09	2.86012e-08	Down Regulated in Acute
ENSG00000136807.11	CDK9	protein_coding	1220.73	-0.596685	0.0988401	-6.03688	1.57125e-09	2.93404e-08	Down Regulated in Acute
ENSG00000023228.13	NDUFS1	protein_coding	1231.41	0.72367	0.119931	6.03403	1.59917e-09	2.9829e-08	Up Regulated in Acute
ENSG00000196839.12	ADA	protein_coding	998.085	0.970401	0.160896	6.03124	1.62704e-09	3.03157e-08	Up Regulated in Acute
ENSG00000168447.10	SCNN1B	protein_coding	10.5331	5.23846	0.869398	6.02539	1.68704e-09	3.13992e-08	Up Regulated in Acute
ENSG00000034053.14	APBA2	protein_coding	314.395	-1.49974	0.248971	-6.02377	1.70399e-09	3.16455e-08	Down Regulated in Acute
ENSG00000059691.11	GATB	protein_coding	346.44	1.05738	0.175532	6.02388	1.70282e-09	3.16455e-08	Up Regulated in Acute
ENSG00000158457.5	TSPAN33	protein_coding	463.173	-1.25331	0.208137	-6.02154	1.72764e-09	3.2e-08	Down Regulated in Acute
ENSG00000156509.13	FBXO43	protein_coding	18.8598	3.3478	0.556281	6.01818	1.76394e-09	3.26876e-08	Up Regulated in Acute
ENSG00000134909.18	ARHGAP32	protein_coding	165.455	-1.37546	0.228626	-6.0162	1.78563e-09	3.30535e-08	Down Regulated in Acute
ENSG00000112249.13	ASCC3	protein_coding	1005.33	0.775285	0.128911	6.01409	1.809e-09	3.34136e-08	Up Regulated in Acute
ENSG00000123358.19	NR4A1	protein_coding	418.084	-2.29979	0.382392	-6.01422	1.80759e-09	3.34136e-08	Down Regulated in Acute
ENSG00000166046.10	TCP11L2	protein_coding	388.721	-1.47896	0.245985	-6.01242	1.82769e-09	3.37222e-08	Down Regulated in Acute
ENSG00000186417.13	GLDN	protein_coding	13.8877	3.93298	0.654695	6.00735	1.88581e-09	3.47569e-08	Up Regulated in Acute
ENSG00000109956.12	B3GAT1	protein_coding	174.706	-2.25058	0.374658	-6.00702	1.88966e-09	3.47902e-08	Down Regulated in Acute
ENSG00000175643.8	RMI2	protein_coding	88.4452	2.06868	0.344512	6.00466	1.91737e-09	3.52622e-08	Up Regulated in Acute
ENSG00000138463.8	DIRC2	protein_coding	216.794	-1.31889	0.219678	-6.00376	1.928e-09	3.53984e-08	Down Regulated in Acute
ENSG00000146576.12	C7orf26	protein_coding	573.914	-0.634888	0.10575	-6.00368	1.92893e-09	3.53984e-08	Down Regulated in Acute
ENSG00000106415.12	GLCCI1	protein_coding	860.61	1.48422	0.2473	6.00168	2e-09	3.57992e-08	Up Regulated in Acute
ENSG00000180354.15	MTURN	protein_coding	353.602	-1.23367	0.205603	-6.00025	2e-09	3.60772e-08	Down Regulated in Acute
ENSG00000181036.13	FCRL6	protein_coding	748.533	-1.89699	0.316188	-5.99954	2e-09	3.61951e-08	Down Regulated in Acute
ENSG00000117682.16	DHDDS	protein_coding	675.585	0.888987	0.148211	5.9981	2e-09	3.6479e-08	Up Regulated in Acute
ENSG00000156253.6	RWDD2B	protein_coding	234.061	1.49057	0.248553	5.99701	2e-09	3.66845e-08	Up Regulated in Acute
ENSG00000104691.14	UBXN8	protein_coding	173.48	1.0769	0.179719	5.99215	2.0708e-09	3.77578e-08	Up Regulated in Acute
ENSG00000011478.11	QPCTL	protein_coding	214.964	1.64348	0.274578	5.98546	2.15779e-09	3.93018e-08	Up Regulated in Acute
ENSG00000168282.5	MGAT2	protein_coding	1119.53	1.0856	0.181655	5.97615	2.28475e-09	4.15698e-08	Up Regulated in Acute
ENSG00000198695.2	MT-ND6	protein_coding	621.327	1.65964	0.277805	5.97412	2.31335e-09	4.2e-08	Up Regulated in Acute
ENSG00000167085.11	PHB	protein_coding	1399.74	0.888837	0.148875	5.97034	2.3676e-09	4.3e-08	Up Regulated in Acute
ENSG00000151247.12	EIF4E	protein_coding	510.439	1.1071	0.185484	5.9687	2.39155e-09	4.33739e-08	Up Regulated in Acute
ENSG00000123131.12	PRDX4	protein_coding	1133.59	2.04464	0.342717	5.96599	2.43159e-09	4.40531e-08	Up Regulated in Acute
ENSG00000172071.11	EIF2AK3	protein_coding	1357.01	1.71899	0.288211	5.96434	2.45621e-09	4.44519e-08	Up Regulated in Acute
ENSG00000214050.7	FBXO16	protein_coding	25.8525	5.05771	0.848251	5.96252	2.48382e-09	4.49038e-08	Up Regulated in Acute
ENSG00000100077.14	ADRBK2	protein_coding	1756.43	-0.971193	0.162928	-5.96086	2.50913e-09	4.53134e-08	Down Regulated in Acute
ENSG00000112303.13	VNN2	protein_coding	2310.45	-1.49108	0.250193	-5.95972	2.52674e-09	4.5583e-08	Down Regulated in Acute
ENSG00000135900.3	MRPL44	protein_coding	780.371	0.930815	0.156226	5.95812	2.55153e-09	4.6e-08	Up Regulated in Acute
ENSG00000185361.8	TNFAIP8L1	protein_coding	342.938	-1.45932	0.244967	-5.95722	2.56562e-09	4.61866e-08	Down Regulated in Acute
ENSG00000100425.18	BRD1	protein_coding	540.259	-0.759349	0.127479	-5.95668	2.57407e-09	4.62898e-08	Down Regulated in Acute
ENSG00000276043.4	UHRF1	protein_coding	151.765	2.89274	0.486328	5.94814	2.7121e-09	4.87205e-08	Up Regulated in Acute
ENSG00000186074.18	CD300LF	protein_coding	2100.12	-1.33946	0.225199	-5.94789	2.71624e-09	4.87435e-08	Down Regulated in Acute
ENSG00000110318.13	CEP126	protein_coding	73.4462	-1.90029	0.319524	-5.94724	2.727e-09	4.88851e-08	Down Regulated in Acute
ENSG00000183662.10	FAM19A1	protein_coding	22.8716	-3.03987	0.511184	-5.94674	2.73542e-09	4.9e-08	Down Regulated in Acute
ENSG00000023445.13	BIRC3	protein_coding	3285.46	-1.12616	0.189471	-5.9437	2.7866e-09	4.98212e-08	Down Regulated in Acute
ENSG00000164051.13	CCDC51	protein_coding	176.99	1.04894	0.176487	5.94345	2.79092e-09	4.98212e-08	Up Regulated in Acute
ENSG00000166562.8	SEC11C	protein_coding	3152.28	2.27257	0.382363	5.94349	2.79018e-09	4.98212e-08	Up Regulated in Acute
ENSG00000174839.12	DENND6A	protein_coding	577.842	-0.787291	0.13254	-5.94001	2.85011e-09	5.08244e-08	Down Regulated in Acute
ENSG00000106991.13	ENG	protein_coding	510.208	-1.2179	0.205052	-5.93946	2.85965e-09	5.09234e-08	Down Regulated in Acute
ENSG00000141627.13	DYM	protein_coding	776.486	-0.815279	0.137267	-5.93934	2.86164e-09	5.09234e-08	Down Regulated in Acute
ENSG00000154153.13	FAM134B	protein_coding	221.816	-1.23798	0.208683	-5.93236	3e-09	5.3083e-08	Down Regulated in Acute
ENSG00000145817.16	YIPF5	protein_coding	586.933	0.954768	0.161122	5.92575	3.1087e-09	5.5184e-08	Up Regulated in Acute
ENSG00000198380.12	GFPT1	protein_coding	644.471	1.25426	0.211667	5.92564	3.11079e-09	5.5184e-08	Up Regulated in Acute
ENSG00000173567.14	ADGRF3	protein_coding	31.696	2.20899	0.373071	5.92111	3.19769e-09	5.66666e-08	Up Regulated in Acute
ENSG00000150593.15	PDCD4	protein_coding	2840.03	-0.890569	0.150426	-5.92031	3.21329e-09	5.68665e-08	Down Regulated in Acute
ENSG00000166483.10	WEE1	protein_coding	196.426	1.39956	0.236404	5.92019	3.21565e-09	5.68665e-08	Up Regulated in Acute
ENSG00000071537.13	SEL1L	protein_coding	2323.4	1.15319	0.194804	5.91971	3.22503e-09	5.7e-08	Up Regulated in Acute
ENSG00000128245.14	YWHAH	protein_coding	1611.57	0.793651	0.134171	5.91522	3.31426e-09	5.84889e-08	Up Regulated in Acute
ENSG00000141540.10	TTYH2	protein_coding	868.48	-1.02428	0.173179	-5.91456	3.32773e-09	5.86658e-08	Down Regulated in Acute
ENSG00000163170.11	BOLA3	protein_coding	183.268	1.55224	0.26252	5.91284	3.36263e-09	5.92198e-08	Up Regulated in Acute
ENSG00000221890.2	NPTXR	protein_coding	64.6838	-2.05158	0.347008	-5.91219	3.3758e-09	5.93904e-08	Down Regulated in Acute
ENSG00000175110.11	MRPS22	protein_coding	674.708	0.651373	0.110183	5.91175	3.38492e-09	5.94894e-08	Up Regulated in Acute
ENSG00000132388.12	UBE2G1	protein_coding	1394.36	1.20193	0.203351	5.91062	3.40831e-09	5.98387e-08	Up Regulated in Acute
ENSG00000119812.18	FAM98A	protein_coding	646.116	1.42098	0.240452	5.90964	3.42846e-09	6.01305e-08	Up Regulated in Acute
ENSG00000276644.4	DACH1	protein_coding	15.3881	-3.6093	0.610769	-5.90944	3.43272e-09	6.01433e-08	Down Regulated in Acute
ENSG00000198786.2	MT-ND5	protein_coding	80420.7	1.13964	0.192996	5.90502	3.52597e-09	6.17135e-08	Up Regulated in Acute
ENSG00000158186.12	MRAS	protein_coding	146.633	-1.33232	0.2257	-5.90307	3.56794e-09	6.23841e-08	Down Regulated in Acute
ENSG00000085063.14	CD59	protein_coding	1222.05	1.64566	0.278894	5.90067	3.62021e-09	6.32329e-08	Up Regulated in Acute
ENSG00000138018.17	EPT1	protein_coding	770.566	0.915453	0.155291	5.89507	3.74518e-09	6.53488e-08	Up Regulated in Acute
ENSG00000168264.10	IRF2BP2	protein_coding	2887.96	-0.962829	0.16336	-5.89391	3.77163e-09	6.5743e-08	Down Regulated in Acute
ENSG00000138768.14	USO1	protein_coding	1804.03	1.21863	0.206798	5.89284	3.79608e-09	6.61015e-08	Up Regulated in Acute
ENSG00000138061.11	CYP1B1	protein_coding	1765.34	-2.01465	0.341918	-5.8922	3.81085e-09	6.62909e-08	Down Regulated in Acute
ENSG00000206560.10	ANKRD28	protein_coding	1054.75	1.48497	0.25221	5.88784	3.91274e-09	6.8e-08	Up Regulated in Acute
ENSG00000156804.7	FBXO32	protein_coding	318.666	-1.28875	0.21897	-5.88551	4e-09	6.88896e-08	Down Regulated in Acute
ENSG00000175216.14	CKAP5	protein_coding	1194.78	0.873852	0.148482	5.88524	4e-09	6.8929e-08	Up Regulated in Acute
ENSG00000163053.10	SLC16A14	protein_coding	91.7013	3.4605	0.588075	5.88445	4e-09	6.91903e-08	Up Regulated in Acute
ENSG00000156958.14	GALK2	protein_coding	422.388	1.09077	0.185408	5.88304	4e-09	6.96969e-08	Up Regulated in Acute
ENSG00000165312.6	OTUD1	protein_coding	382.778	-1.3599	0.231161	-5.88291	4e-09	6.96969e-08	Down Regulated in Acute
ENSG00000185187.12	SIGIRR	protein_coding	1125.71	-1.08843	0.185027	-5.88257	4e-09	6.97705e-08	Down Regulated in Acute
ENSG00000205903.6	ZNF316	protein_coding	685.154	-0.843338	0.143389	-5.88147	4.06644e-09	7.01637e-08	Down Regulated in Acute
ENSG00000123737.12	EXOSC9	protein_coding	978.079	0.778581	0.13239	5.88097	4.07869e-09	7.03038e-08	Up Regulated in Acute
ENSG00000125827.8	TMX4	protein_coding	1088.63	-0.848762	0.144417	-5.87716	4.17353e-09	7.18657e-08	Down Regulated in Acute
ENSG00000071051.13	NCK2	protein_coding	518.483	-1.02352	0.174241	-5.87415	4.25012e-09	7.31106e-08	Down Regulated in Acute
ENSG00000006747.14	SCIN	protein_coding	30.4171	2.87039	0.488792	5.87241	4.29499e-09	7.3808e-08	Up Regulated in Acute
ENSG00000156966.6	B3GNT7	protein_coding	50.5424	-2.18836	0.372831	-5.86957	4.36933e-09	7.5e-08	Down Regulated in Acute
ENSG00000174080.10	CTSF	protein_coding	170.002	-1.60035	0.272721	-5.86806	4.4092e-09	7.5618e-08	Down Regulated in Acute
ENSG00000029993.14	HMGB3	protein_coding	315.316	2.03979	0.347963	5.86209	4.57088e-09	7.83119e-08	Up Regulated in Acute
ENSG00000166927.12	MS4A7	protein_coding	1927.84	-1.39205	0.237503	-5.86122	4.59491e-09	7.86445e-08	Down Regulated in Acute
ENSG00000116133.11	DHCR24	protein_coding	355.274	1.8181	0.310289	5.85936	4.64648e-09	7.94473e-08	Up Regulated in Acute
ENSG00000168918.13	INPP5D	protein_coding	4427.76	-0.906477	0.154717	-5.85893	4.65848e-09	7.95726e-08	Down Regulated in Acute
ENSG00000074966.10	TXK	protein_coding	527.254	-1.22594	0.209311	-5.85704	4.71188e-09	8.04042e-08	Down Regulated in Acute
ENSG00000162129.12	CLPB	protein_coding	329.827	0.966603	0.165079	5.85541	4.75838e-09	8.11163e-08	Up Regulated in Acute
ENSG00000009694.13	TENM1	protein_coding	95.7031	-2.12148	0.362405	-5.85389	4.80207e-09	8.17793e-08	Down Regulated in Acute
ENSG00000163536.12	SERPINI1	protein_coding	98.7937	1.67034	0.285369	5.85327	4.82e-09	8.2e-08	Up Regulated in Acute
ENSG00000185482.7	STAC3	protein_coding	847.266	1.20077	0.205185	5.85211	4.85368e-09	8.24932e-08	Up Regulated in Acute
ENSG00000254858.9	MPV17L2	protein_coding	202.591	0.843171	0.144117	5.85061	4.89765e-09	8.31575e-08	Up Regulated in Acute
ENSG00000147536.11	GINS4	protein_coding	136.912	2.17255	0.371536	5.84749	5e-09	8.46486e-08	Up Regulated in Acute
ENSG00000240505.8	TNFRSF13B	protein_coding	417.725	2.63188	0.450114	5.84714	5e-09	8.47403e-08	Up Regulated in Acute
ENSG00000137103.16	TMEM8B	protein_coding	134.403	-1.41862	0.242697	-5.84523	5.05878e-09	8.56372e-08	Down Regulated in Acute
ENSG00000096063.14	SRPK1	protein_coding	789.926	0.759768	0.129992	5.84474	5.07349e-09	8.5801e-08	Up Regulated in Acute
ENSG00000167747.13	C19orf48	protein_coding	403.417	1.32431	0.226695	5.84182	5.16349e-09	8.72363e-08	Up Regulated in Acute
ENSG00000090238.11	YPEL3	protein_coding	1519.02	-1.34713	0.230619	-5.84138	5.1771e-09	8.73796e-08	Down Regulated in Acute
ENSG00000089775.11	ZBTB25	protein_coding	694.697	-0.838087	0.143495	-5.84051	5.204e-09	8.76599e-08	Down Regulated in Acute
ENSG00000182827.8	ACBD3	protein_coding	731.472	1.00859	0.172689	5.84053	5.20341e-09	8.76599e-08	Up Regulated in Acute
ENSG00000171634.16	BPTF	protein_coding	1628.93	-0.738087	0.126422	-5.83826	5.27486e-09	8.87657e-08	Down Regulated in Acute
ENSG00000171155.7	C1GALT1C1	protein_coding	591.674	1.77857	0.304778	5.83563	5.35882e-09	9.00896e-08	Up Regulated in Acute
ENSG00000151575.14	TEX9	protein_coding	68.6143	2.45289	0.420572	5.83227	5.46791e-09	9.18329e-08	Up Regulated in Acute
ENSG00000170819.4	BFSP2	protein_coding	30.1387	3.46872	0.594934	5.83043	5.52843e-09	9.27578e-08	Up Regulated in Acute
ENSG00000101298.13	SNPH	protein_coding	102.189	-1.40728	0.241499	-5.82729	5.63339e-09	9.44259e-08	Down Regulated in Acute
ENSG00000148600.14	CDHR1	protein_coding	66.2724	-2.53854	0.435663	-5.82684	5.64851e-09	9.45861e-08	Down Regulated in Acute
ENSG00000162894.11	FCMR	protein_coding	2566.89	-0.706554	0.121265	-5.82651	5.65972e-09	9.46807e-08	Down Regulated in Acute
ENSG00000139192.11	TAPBPL	protein_coding	1082.95	0.576911	0.0990265	5.82583	5.68304e-09	9.5e-08	Up Regulated in Acute
ENSG00000100567.12	PSMA3	protein_coding	2056.59	1.16778	0.200476	5.82501	5.7108e-09	9.53479e-08	Up Regulated in Acute
ENSG00000078900.14	TP73	protein_coding	50.9446	3.68234	0.632534	5.82157	5.82969e-09	9.72376e-08	Up Regulated in Acute
ENSG00000157017.15	GHRL	protein_coding	52.8153	-1.75696	0.301863	-5.82038	5.87137e-09	9.78371e-08	Down Regulated in Acute
ENSG00000133612.18	AGAP3	protein_coding	537.011	-1.12176	0.192744	-5.81997	5.88594e-09	9.8e-08	Down Regulated in Acute
ENSG00000141469.16	SLC14A1	protein_coding	145.234	-1.52527	0.262084	-5.81976	5.89326e-09	9.8e-08	Down Regulated in Acute
ENSG00000099860.8	GADD45B	protein_coding	1163.57	-1.20423	0.206938	-5.81927	5.91059e-09	9.82022e-08	Down Regulated in Acute
ENSG00000128891.15	C15orf57	protein_coding	776.739	0.977694	0.168062	5.81746	6e-09	9.91713e-08	Up Regulated in Acute
ENSG00000104490.17	NCALD	protein_coding	236.094	-1.31137	0.225493	-5.81557	6e-09	1.00205e-07	Down Regulated in Acute
ENSG00000087842.10	PIR	protein_coding	14.6996	4.16204	0.716134	5.81182	6.17966e-09	1.02373e-07	Up Regulated in Acute
ENSG00000172731.13	LRRC20	protein_coding	105.29	1.3543	0.233079	5.81051	6.22832e-09	1.03079e-07	Up Regulated in Acute
ENSG00000174776.10	WDR49	protein_coding	18.734	-3.1459	0.541514	-5.80946	6.26751e-09	1.03627e-07	Down Regulated in Acute
ENSG00000136237.18	RAPGEF5	protein_coding	52.3551	3.31064	0.570339	5.80468	6.44891e-09	1.06419e-07	Up Regulated in Acute
ENSG00000164825.3	DEFB1	protein_coding	64.3565	4.51302	0.777476	5.8047	6.4481e-09	1.06419e-07	Up Regulated in Acute
ENSG00000167670.15	CHAF1A	protein_coding	421.138	1.02705	0.176954	5.80404	6.47353e-09	1.06722e-07	Up Regulated in Acute
ENSG00000131400.7	NAPSA	protein_coding	61.1277	2.23219	0.384612	5.80375	6.48486e-09	1.06806e-07	Up Regulated in Acute
ENSG00000138795.9	LEF1	protein_coding	1589.72	-1.2885	0.222059	-5.80252	6.53266e-09	1.07489e-07	Down Regulated in Acute
ENSG00000136824.18	SMC2	protein_coding	475.421	1.88125	0.324408	5.79903	6.66987e-09	1.09641e-07	Up Regulated in Acute
ENSG00000196526.10	AFAP1	protein_coding	74.8978	-1.95673	0.337683	-5.79456	6.84985e-09	1.12491e-07	Down Regulated in Acute
ENSG00000146285.13	SCML4	protein_coding	623.662	-1.30574	0.225378	-5.79357	6.89076e-09	1.13054e-07	Down Regulated in Acute
ENSG00000171631.14	P2RY6	protein_coding	163.468	2.51638	0.434451	5.79208	7e-09	1.13947e-07	Up Regulated in Acute
ENSG00000177301.13	KCNA2	protein_coding	141.907	2.56275	0.442537	5.79105	7e-09	1.14539e-07	Up Regulated in Acute
ENSG00000225614.2	ZNF469	protein_coding	22.8941	-2.208	0.381494	-5.78778	7.13247e-09	1.16682e-07	Down Regulated in Acute
ENSG00000075131.9	TIPIN	protein_coding	140.728	1.62158	0.280309	5.78498	7.25207e-09	1.18525e-07	Up Regulated in Acute
ENSG00000182985.16	CADM1	protein_coding	140.77	1.76543	0.305196	5.78458	7.2694e-09	1.18694e-07	Up Regulated in Acute
ENSG00000112787.12	FBRSL1	protein_coding	619.29	-1.25192	0.216436	-5.78425	7.28344e-09	1.18809e-07	Down Regulated in Acute
ENSG00000165280.15	VCP	protein_coding	5334.71	1.0171	0.175943	5.78084	7.43291e-09	1.21132e-07	Up Regulated in Acute
ENSG00000158406.3	HIST1H4H	protein_coding	28.7072	3.02897	0.524125	5.77909	7.51076e-09	1.22244e-07	Up Regulated in Acute
ENSG00000181847.11	TIGIT	protein_coding	542.383	-1.24909	0.216143	-5.77898	7.51552e-09	1.22244e-07	Down Regulated in Acute
ENSG00000109674.3	NEIL3	protein_coding	27.0879	3.58502	0.620454	5.77806	7.55673e-09	1.22797e-07	Up Regulated in Acute
ENSG00000152127.8	MGAT5	protein_coding	995.566	-0.754481	0.130749	-5.77044	7.90643e-09	1.28357e-07	Down Regulated in Acute
ENSG00000145050.15	MANF	protein_coding	2255.85	2.16602	0.375411	5.76973	7.93984e-09	1.28668e-07	Up Regulated in Acute
ENSG00000172613.7	RAD9A	protein_coding	673.143	0.979334	0.169737	5.76971	7.94073e-09	1.28668e-07	Up Regulated in Acute
ENSG00000151136.14	BTBD11	protein_coding	222.369	-1.21359	0.210374	-5.76873	8e-09	1.29297e-07	Down Regulated in Acute
ENSG00000115233.11	PSMD14	protein_coding	944.217	1.19073	0.206555	5.76472	8.17946e-09	1.32285e-07	Up Regulated in Acute
ENSG00000204394.12	VARS	protein_coding	1040.7	1.01306	0.175841	5.76121	8.35113e-09	1.34933e-07	Up Regulated in Acute
ENSG00000006530.15	AGK	protein_coding	635.37	1.31955	0.22906	5.7607	8.37634e-09	1.35212e-07	Up Regulated in Acute
ENSG00000074590.13	NUAK1	protein_coding	14.4193	-3.36581	0.584395	-5.75947	8.43761e-09	1.35944e-07	Down Regulated in Acute
ENSG00000163918.10	RFC4	protein_coding	585.046	1.75003	0.303852	5.7595	8.43618e-09	1.35944e-07	Up Regulated in Acute
ENSG00000145990.10	GFOD1	protein_coding	394.239	-1.06393	0.184774	-5.75802	8.51061e-09	1.37e-07	Down Regulated in Acute
ENSG00000159063.12	ALG8	protein_coding	521.306	1.11675	0.194067	5.75445	8.69234e-09	1.39783e-07	Up Regulated in Acute
ENSG00000173226.16	IQCB1	protein_coding	888.798	1.0314	0.179248	5.75404	8.71337e-09	1.4e-07	Up Regulated in Acute
ENSG00000107954.10	NEURL1	protein_coding	121.639	-1.96601	0.341714	-5.75337	8.74792e-09	1.40412e-07	Down Regulated in Acute
ENSG00000185920.15	PTCH1	protein_coding	218.163	-1.30899	0.227537	-5.75287	8.77431e-09	1.40703e-07	Down Regulated in Acute
ENSG00000213719.8	CLIC1	protein_coding	10200.2	0.715744	0.124463	5.75064	8.89059e-09	1.42433e-07	Up Regulated in Acute
ENSG00000115091.11	ACTR3	protein_coding	5678.09	0.709983	0.123495	5.7491	9e-09	1.43601e-07	Up Regulated in Acute
ENSG00000170222.11	ADPRM	protein_coding	261.892	-0.733659	0.127663	-5.74683	9.09337e-09	1.45409e-07	Down Regulated in Acute
ENSG00000196678.13	ERI2	protein_coding	114.343	1.61675	0.281367	5.74606	9.13471e-09	1.45933e-07	Up Regulated in Acute
ENSG00000114850.6	SSR3	protein_coding	3978.32	1.43106	0.249182	5.74303	9.29956e-09	1.48427e-07	Up Regulated in Acute
ENSG00000102796.10	DHRS12	protein_coding	211.347	-0.886355	0.154401	-5.74059	9.43471e-09	1.50443e-07	Down Regulated in Acute
ENSG00000110435.11	PDHX	protein_coding	386.138	0.917782	0.15989	5.74008	9.46318e-09	1.50538e-07	Up Regulated in Acute
ENSG00000112406.4	HECA	protein_coding	2024.21	-0.911985	0.15888	-5.74008	9.46345e-09	1.50538e-07	Down Regulated in Acute
ENSG00000165810.16	BTNL9	protein_coding	29.8946	-2.13241	0.371499	-5.74001	9.4672e-09	1.50538e-07	Down Regulated in Acute
ENSG00000119950.20	MXI1	protein_coding	454.43	-1.38687	0.241708	-5.7378	9.59163e-09	1.52375e-07	Down Regulated in Acute
ENSG00000135426.14	TESPA1	protein_coding	1398.2	-0.992973	0.17308	-5.73708	9.63237e-09	1.52879e-07	Down Regulated in Acute
ENSG00000175471.19	MCTP1	protein_coding	409.184	-1.18208	0.20605	-5.73686	9.6447e-09	1.52932e-07	Down Regulated in Acute
ENSG00000138744.14	NAAA	protein_coding	2149.74	-0.876427	0.152781	-5.73648	9.66656e-09	1.53136e-07	Down Regulated in Acute
ENSG00000198848.12	CES1	protein_coding	1683.81	2.13691	0.372617	5.73488	9.75788e-09	1.54439e-07	Up Regulated in Acute
ENSG00000172349.16	IL16	protein_coding	4128.27	-0.79258	0.138252	-5.73285	9.87579e-09	1.5616e-07	Down Regulated in Acute
ENSG00000102870.5	ZNF629	protein_coding	149.47	-1.31773	0.229897	-5.73184	9.93485e-09	1.56949e-07	Down Regulated in Acute
ENSG00000047621.11	C12orf4	protein_coding	485.508	0.750188	0.130946	5.72898	1.01035e-08	1.59465e-07	Up Regulated in Acute
ENSG00000185624.14	P4HB	protein_coding	8155.52	1.04314	0.182129	5.72748	1.01936e-08	1.60739e-07	Up Regulated in Acute
ENSG00000116679.15	IVNS1ABP	protein_coding	3398.22	-0.83112	0.145153	-5.72581	1.02941e-08	1.62172e-07	Down Regulated in Acute
ENSG00000168646.12	AXIN2	protein_coding	133.846	-1.76317	0.307971	-5.72511	1.03365e-08	1.6269e-07	Down Regulated in Acute
ENSG00000123562.16	MORF4L2	protein_coding	1666.19	0.854719	0.14933	5.7237	1.04231e-08	1.63902e-07	Up Regulated in Acute
ENSG00000110315.6	RNF141	protein_coding	850.141	-0.751746	0.131366	-5.72251	1.0496e-08	1.64896e-07	Down Regulated in Acute
ENSG00000161921.14	CXCL16	protein_coding	815.885	-1.80833	0.316022	-5.72217	1.05173e-08	1.65078e-07	Down Regulated in Acute
ENSG00000170074.19	FAM153A	protein_coding	204.703	-1.5755	0.275844	-5.71156	1.11947e-08	1.75548e-07	Down Regulated in Acute
ENSG00000181458.10	TMEM45A	protein_coding	17.5925	3.69941	0.647754	5.71114	1.12224e-08	1.75822e-07	Up Regulated in Acute
ENSG00000132436.11	FIGNL1	protein_coding	203.309	1.02198	0.179113	5.70581	1.15788e-08	1.81238e-07	Up Regulated in Acute
ENSG00000136986.9	DERL1	protein_coding	1817.79	0.864204	0.151474	5.7053	1.16138e-08	1.8162e-07	Up Regulated in Acute
ENSG00000035115.21	SH3YL1	protein_coding	396.404	-0.697914	0.12234	-5.70472	1.16536e-08	1.81908e-07	Down Regulated in Acute
ENSG00000158089.14	GALNT14	protein_coding	26.4104	3.4766	0.609419	5.70478	1.16494e-08	1.81908e-07	Up Regulated in Acute
ENSG00000162512.15	SDC3	protein_coding	306.245	2.15492	0.37795	5.7016	1.18691e-08	1.85102e-07	Up Regulated in Acute
ENSG00000108370.15	RGS9	protein_coding	104.034	-2.09817	0.368027	-5.70114	1.19006e-08	1.85423e-07	Down Regulated in Acute
ENSG00000134508.12	CABLES1	protein_coding	34.3027	2.55952	0.449043	5.69993	1.2e-08	1.86574e-07	Up Regulated in Acute
ENSG00000160789.19	LMNA	protein_coding	269.825	-1.00487	0.176302	-5.69971	1.2e-08	1.8665e-07	Down Regulated in Acute
ENSG00000169359.13	SLC33A1	protein_coding	630.862	1.01077	0.177347	5.69939	1.2e-08	1.86832e-07	Up Regulated in Acute
ENSG00000090565.15	RAB11FIP3	protein_coding	261.775	-0.987012	0.173209	-5.69839	1.20945e-08	1.87706e-07	Down Regulated in Acute
ENSG00000134910.12	STT3A	protein_coding	2672.23	1.64446	0.288589	5.69828	1.21022e-08	1.87706e-07	Up Regulated in Acute
ENSG00000105373.18	GLTSCR2	protein_coding	4420.79	-1.38562	0.24318	-5.69792	1.21278e-08	1.87932e-07	Down Regulated in Acute
ENSG00000188822.7	CNR2	protein_coding	210.145	-1.42647	0.2504	-5.69677	1.22099e-08	1.89e-07	Down Regulated in Acute
ENSG00000204681.10	GABBR1	protein_coding	2311.99	-1.20584	0.211776	-5.69395	1.24133e-08	1.92e-07	Down Regulated in Acute
ENSG00000100418.7	DESI1	protein_coding	1100.62	0.589971	0.10367	5.69086	1.26398e-08	1.95331e-07	Up Regulated in Acute
ENSG00000184428.12	TOP1MT	protein_coding	290.507	-1.05607	0.185654	-5.68839	1.28245e-08	1.98e-07	Down Regulated in Acute
ENSG00000129116.17	PALLD	protein_coding	117.754	-1.60504	0.282181	-5.68799	1.28541e-08	1.98283e-07	Down Regulated in Acute
ENSG00000088836.12	SLC4A11	protein_coding	18.7452	2.76721	0.486693	5.68575	1.3e-08	2.00728e-07	Up Regulated in Acute
ENSG00000152953.12	STK32B	protein_coding	28.1829	-2.56099	0.450529	-5.68441	1.31267e-08	2.021e-07	Down Regulated in Acute
ENSG00000164270.17	HTR4	protein_coding	6.33986	4.14722	0.729616	5.68412	1.3149e-08	2.021e-07	Up Regulated in Acute
ENSG00000180155.18	LYNX1	protein_coding	55.7725	-2.41073	0.424111	-5.6842	1.31423e-08	2.021e-07	Down Regulated in Acute
ENSG00000133639.4	BTG1	protein_coding	6032.8	-1.04207	0.183347	-5.68358	1.319e-08	2.02548e-07	Down Regulated in Acute
ENSG00000121989.14	ACVR2A	protein_coding	243.648	-1.06496	0.187479	-5.68043	1.34355e-08	2.06132e-07	Down Regulated in Acute
ENSG00000177294.6	FBXO39	protein_coding	15.0293	4.09243	0.720755	5.67798	1.36293e-08	2.08918e-07	Up Regulated in Acute
ENSG00000188312.13	CENPP	protein_coding	91.7829	1.49069	0.262632	5.67597	1.37906e-08	2.11199e-07	Up Regulated in Acute
ENSG00000076242.14	MLH1	protein_coding	814.299	1.10734	0.195112	5.67542	1.38347e-08	2.11494e-07	Up Regulated in Acute
ENSG00000143641.9	GALNT2	protein_coding	1192.33	0.988973	0.174253	5.67551	1.38278e-08	2.11494e-07	Up Regulated in Acute
ENSG00000123689.5	G0S2	protein_coding	124.79	-3.36573	0.593123	-5.67459	1.39018e-08	2.1233e-07	Down Regulated in Acute
ENSG00000103257.8	SLC7A5	protein_coding	558.102	1.672	0.294727	5.67304	1.4e-08	2.13932e-07	Up Regulated in Acute
ENSG00000113552.15	GNPDA1	protein_coding	667.871	0.659057	0.116174	5.673	1.4e-08	2.13932e-07	Up Regulated in Acute
ENSG00000141905.17	NFIC	protein_coding	423.016	-1.50472	0.26526	-5.67264	1.4061e-08	2.14186e-07	Down Regulated in Acute
ENSG00000133985.2	TTC9	protein_coding	335.963	-1.30682	0.230379	-5.67246	1.40759e-08	2.1422e-07	Down Regulated in Acute
ENSG00000116985.10	BMP8B	protein_coding	217.23	2.06983	0.364962	5.67136	1.41668e-08	2.15411e-07	Up Regulated in Acute
ENSG00000135631.15	RAB11FIP5	protein_coding	154.071	-1.54841	0.273103	-5.66968	1.43066e-08	2.17343e-07	Down Regulated in Acute
ENSG00000128228.4	SDF2L1	protein_coding	449.913	2.15377	0.379934	5.66882	1.43788e-08	2.18246e-07	Up Regulated in Acute
ENSG00000164934.13	DCAF13	protein_coding	724.042	0.76842	0.135573	5.66793	1.44535e-08	2.19183e-07	Up Regulated in Acute
ENSG00000113742.12	CPEB4	protein_coding	961.959	1.26256	0.222953	5.66289	1.48841e-08	2.25512e-07	Up Regulated in Acute
ENSG00000119326.14	CTNNAL1	protein_coding	122.987	2.3998	0.42383	5.66218	1.49464e-08	2.26255e-07	Up Regulated in Acute
ENSG00000135709.12	KIAA0513	protein_coding	1355.6	-0.671368	0.11858	-5.66174	1.5e-08	2.26555e-07	Down Regulated in Acute
ENSG00000176974.17	SHMT1	protein_coding	387.783	1.39375	0.246173	5.66165	1.5e-08	2.26555e-07	Up Regulated in Acute
ENSG00000081665.13	ZNF506	protein_coding	381.757	-1.06303	0.187937	-5.65628	1.54688e-08	2.3354e-07	Down Regulated in Acute
ENSG00000143375.14	CGN	protein_coding	20.5082	2.99661	0.530365	5.65009	1.6e-08	2.41894e-07	Up Regulated in Acute
ENSG00000184545.10	DUSP8	protein_coding	44.6729	-2.85974	0.506263	-5.64873	1.61634e-08	2.43595e-07	Down Regulated in Acute
ENSG00000182095.14	TNRC18	protein_coding	736.131	-0.953781	0.168868	-5.64809	1.62242e-08	2.44295e-07	Down Regulated in Acute
ENSG00000173221.13	GLRX	protein_coding	3069.11	1.07417	0.190365	5.64269	1.67414e-08	2.51861e-07	Up Regulated in Acute
ENSG00000111275.12	ALDH2	protein_coding	2026.99	-1.5495	0.274664	-5.64143	1.6864e-08	2.53481e-07	Down Regulated in Acute
ENSG00000164305.17	CASP3	protein_coding	1257.41	2.05884	0.364976	5.64101	1.69053e-08	2.53877e-07	Up Regulated in Acute
ENSG00000079974.17	RABL2B	protein_coding	532.175	-0.886234	0.157237	-5.63627	1.73769e-08	2.6073e-07	Down Regulated in Acute
ENSG00000131781.12	FMO5	protein_coding	151.511	-1.40914	0.250067	-5.63504	1.75016e-08	2.6237e-07	Down Regulated in Acute
ENSG00000133134.11	BEX2	protein_coding	127.421	-1.28022	0.2272	-5.63477	1.75293e-08	2.62554e-07	Down Regulated in Acute
ENSG00000124635.8	HIST1H2BJ	protein_coding	54.6243	1.89585	0.336539	5.63337	1.76718e-08	2.64223e-07	Up Regulated in Acute
ENSG00000135446.16	CDK4	protein_coding	804.343	1.03109	0.183033	5.63338	1.76716e-08	2.64223e-07	Up Regulated in Acute
ENSG00000127334.10	DYRK2	protein_coding	1191.04	-1.1124	0.197564	-5.6306	1.8e-08	2.68276e-07	Down Regulated in Acute
ENSG00000081052.11	COL4A4	protein_coding	179.547	1.74468	0.309871	5.63035	1.8e-08	2.6843e-07	Up Regulated in Acute
ENSG00000167528.12	ZNF641	protein_coding	1095.54	-0.757062	0.134489	-5.62916	1.8109e-08	2.7e-07	Down Regulated in Acute
ENSG00000273983.1	HIST1H3G	protein_coding	7.70396	4.04178	0.718606	5.62446	1.86086e-08	2.77256e-07	Up Regulated in Acute
ENSG00000165929.12	TC2N	protein_coding	1046.96	-1.09423	0.194664	-5.62112	1.9e-08	2.82428e-07	Down Regulated in Acute
ENSG00000086475.14	SEPHS1	protein_coding	703.084	0.890313	0.158453	5.61879	1.92304e-08	2.85771e-07	Up Regulated in Acute
ENSG00000088298.12	EDEM2	protein_coding	1546.21	0.872478	0.155277	5.61883	1.92251e-08	2.85771e-07	Up Regulated in Acute
ENSG00000107771.15	CCSER2	protein_coding	773.404	-1.03018	0.183365	-5.6182	1.92963e-08	2.865e-07	Down Regulated in Acute
ENSG00000146223.14	RPL7L1	protein_coding	1438.18	0.545922	0.0971779	5.61775	1.93455e-08	2.86731e-07	Up Regulated in Acute
ENSG00000182557.7	SPNS3	protein_coding	91.3009	-1.81586	0.323231	-5.61784	1.93365e-08	2.86731e-07	Down Regulated in Acute
ENSG00000097046.12	CDC7	protein_coding	321.063	1.35697	0.241624	5.61605	1.9537e-08	2.89317e-07	Up Regulated in Acute
ENSG00000005884.17	ITGA3	protein_coding	120.288	1.70496	0.303971	5.60896	2.03541e-08	3.01155e-07	Up Regulated in Acute
ENSG00000162511.7	LAPTM5	protein_coding	27213	-0.901373	0.160723	-5.60823	2.04406e-08	3.02174e-07	Down Regulated in Acute
ENSG00000133935.6	C14orf1	protein_coding	382.077	0.82528	0.147204	5.60639	2.06592e-08	3.05139e-07	Up Regulated in Acute
ENSG00000131844.15	MCCC2	protein_coding	756.101	0.643126	0.114797	5.6023	2.11523e-08	3.12152e-07	Up Regulated in Acute
ENSG00000162063.12	CCNF	protein_coding	195.672	2.20962	0.394475	5.60141	2.12619e-08	3.13497e-07	Up Regulated in Acute
ENSG00000010810.17	FYN	protein_coding	3872.9	-0.932626	0.166573	-5.5989	2.15716e-08	3.17789e-07	Down Regulated in Acute
ENSG00000151623.14	NR3C2	protein_coding	150.381	-1.75567	0.313699	-5.59669	2.18489e-08	3.21596e-07	Down Regulated in Acute
ENSG00000160305.17	DIP2A	protein_coding	1558.37	-0.744569	0.133062	-5.59566	2.2e-08	3.23228e-07	Down Regulated in Acute
ENSG00000165300.7	SLITRK5	protein_coding	11.4698	-4.96448	0.887775	-5.59205	2.24408e-08	3.29739e-07	Down Regulated in Acute
ENSG00000179094.13	PER1	protein_coding	1913.29	-2.23463	0.399864	-5.58848	2.29065e-08	3.36292e-07	Down Regulated in Acute
ENSG00000099377.13	HSD3B7	protein_coding	68.5764	2.36896	0.424052	5.58649	2.31706e-08	3.39875e-07	Up Regulated in Acute
ENSG00000181544.13	FANCB	protein_coding	43.2914	1.76142	0.3155	5.58294	2.36482e-08	3.46582e-07	Up Regulated in Acute
ENSG00000112511.17	PHF1	protein_coding	1543.22	-0.790927	0.141751	-5.57969	2.40952e-08	3.5283e-07	Down Regulated in Acute
ENSG00000084070.11	SMAP2	protein_coding	8055.18	-0.811619	0.145608	-5.574	2.48957e-08	3.64238e-07	Down Regulated in Acute
ENSG00000137806.8	NDUFAF1	protein_coding	410.087	1.41	0.253004	5.57306	2.5e-08	3.65587e-07	Up Regulated in Acute
ENSG00000158373.8	HIST1H2BD	protein_coding	137.556	1.82344	0.327183	5.57315	2.5e-08	3.65587e-07	Up Regulated in Acute
ENSG00000005339.12	CREBBP	protein_coding	1782.38	-0.923799	0.16594	-5.56705	2.59089e-08	3.77826e-07	Down Regulated in Acute
ENSG00000141543.9	EIF4A3	protein_coding	1361.88	0.765539	0.137513	5.56702	2.59132e-08	3.77826e-07	Up Regulated in Acute
ENSG00000156973.13	PDE6D	protein_coding	369.327	0.709893	0.127557	5.56531	2.61683e-08	3.8122e-07	Up Regulated in Acute
ENSG00000138709.17	LARP1B	protein_coding	449.309	1.2312	0.221347	5.56231	2.66223e-08	3.87172e-07	Up Regulated in Acute
ENSG00000182993.3	C12orf60	protein_coding	20.5216	2.51662	0.452439	5.56233	2.6619e-08	3.87172e-07	Up Regulated in Acute
ENSG00000161980.5	POLR3K	protein_coding	259.455	0.923221	0.165984	5.56211	2.66532e-08	3.8729e-07	Up Regulated in Acute
ENSG00000144579.7	CTDSP1	protein_coding	3137.9	-0.81038	0.145777	-5.55905	2.71246e-08	3.93804e-07	Down Regulated in Acute
ENSG00000053254.15	FOXN3	protein_coding	1954.81	-0.616903	0.110986	-5.55837	2.7231e-08	3.94906e-07	Down Regulated in Acute
ENSG00000087589.16	CASS4	protein_coding	110.639	-1.96692	0.353873	-5.55827	2.72469e-08	3.94906e-07	Down Regulated in Acute
ENSG00000092871.16	RFFL	protein_coding	617.137	-0.791233	0.142399	-5.55645	2.75323e-08	3.98703e-07	Down Regulated in Acute
ENSG00000099992.15	TBC1D10A	protein_coding	336.084	-0.955339	0.17214	-5.54979	2.86008e-08	4.13825e-07	Down Regulated in Acute
ENSG00000113810.15	SMC4	protein_coding	1977.16	1.4771	0.266218	5.54846	2.88193e-08	4.16377e-07	Up Regulated in Acute
ENSG00000151062.14	CACNA2D4	protein_coding	429.492	-0.839285	0.151266	-5.54842	2.88261e-08	4.16377e-07	Down Regulated in Acute
ENSG00000137869.13	CYP19A1	protein_coding	17.0637	4.10741	0.740647	5.5457	2.92782e-08	4.22549e-07	Up Regulated in Acute
ENSG00000204475.9	NCR3	protein_coding	168.594	-1.5725	0.283859	-5.53972	3.02955e-08	4.3686e-07	Down Regulated in Acute
ENSG00000189430.12	NCR1	protein_coding	75.765	-1.72241	0.311	-5.53828	3.05451e-08	4.40087e-07	Down Regulated in Acute
ENSG00000141480.17	ARRB2	protein_coding	8094.99	-0.857646	0.154898	-5.53683	3.07991e-08	4.43365e-07	Down Regulated in Acute
ENSG00000273604.1	C17orf96	protein_coding	37.8769	2.25702	0.407648	5.53669	3.08247e-08	4.43365e-07	Up Regulated in Acute
ENSG00000107679.14	PLEKHA1	protein_coding	460.266	-1.22527	0.221326	-5.53604	3.09382e-08	4.44623e-07	Down Regulated in Acute
ENSG00000182628.12	SKA2	protein_coding	492.779	1.33719	0.241711	5.53219	3.16252e-08	4.54112e-07	Up Regulated in Acute
ENSG00000068137.14	PLEKHH3	protein_coding	19.4466	2.51934	0.456061	5.52413	3.31116e-08	4.75056e-07	Up Regulated in Acute
ENSG00000126262.4	FFAR2	protein_coding	296.49	1.92558	0.348908	5.51886	3.412e-08	4.8911e-07	Up Regulated in Acute
ENSG00000127585.11	FBXL16	protein_coding	96.9293	-1.34878	0.24445	-5.5176	3.43659e-08	4.92222e-07	Down Regulated in Acute
ENSG00000257242.6	C12orf79	protein_coding	73.826	-1.89317	0.343155	-5.51694	3.44949e-08	4.93655e-07	Down Regulated in Acute
ENSG00000183831.6	ANKRD45	protein_coding	9.5861	4.66451	0.845946	5.51396	3.50843e-08	5.01667e-07	Up Regulated in Acute
ENSG00000033178.12	UBA6	protein_coding	955.984	0.619818	0.112449	5.51198	3.5481e-08	5.06913e-07	Up Regulated in Acute
ENSG00000158292.6	GPR153	protein_coding	41.9659	-2.18835	0.397107	-5.51072	3.57369e-08	5.10143e-07	Down Regulated in Acute
ENSG00000112578.9	BYSL	protein_coding	174.989	1.38302	0.251007	5.50989	3.59062e-08	5.12129e-07	Up Regulated in Acute
ENSG00000168280.16	KIF5C	protein_coding	85.1216	-1.69927	0.308476	-5.50858	3.61733e-08	5.15507e-07	Down Regulated in Acute
ENSG00000165501.16	LRR1	protein_coding	259.254	1.29613	0.235334	5.50763	3.63693e-08	5.17868e-07	Up Regulated in Acute
ENSG00000186871.6	ERCC6L	protein_coding	55.1327	3.24679	0.589731	5.50555	3.68025e-08	5.23598e-07	Up Regulated in Acute
ENSG00000130204.12	TOMM40	protein_coding	504.897	0.663842	0.120589	5.505	3.6917e-08	5.24788e-07	Up Regulated in Acute
ENSG00000022267.16	FHL1	protein_coding	178.305	-1.34884	0.245061	-5.50411	3.71031e-08	5.27e-07	Down Regulated in Acute
ENSG00000089692.8	LAG3	protein_coding	502.24	1.67538	0.304456	5.50286	3.73684e-08	5.3032e-07	Up Regulated in Acute
ENSG00000112473.16	SLC39A7	protein_coding	1702.77	1.19237	0.216808	5.49964	3.80563e-08	5.39633e-07	Up Regulated in Acute
ENSG00000118363.11	SPCS2	protein_coding	2138.65	1.63017	0.296451	5.49895	3.82063e-08	5.41309e-07	Up Regulated in Acute
ENSG00000182247.9	UBE2E2	protein_coding	272.44	-0.631936	0.11493	-5.49845	3.8314e-08	5.42383e-07	Down Regulated in Acute
ENSG00000110756.17	HPS5	protein_coding	626.464	1.166	0.212144	5.49626	3.87936e-08	5.48717e-07	Up Regulated in Acute
ENSG00000213654.9	GPSM3	protein_coding	5432.47	-0.750941	0.136633	-5.49605	3.88382e-08	5.48892e-07	Down Regulated in Acute
ENSG00000072778.19	ACADVL	protein_coding	6530.44	0.562248	0.102377	5.49193	3.97573e-08	5.61416e-07	Up Regulated in Acute
ENSG00000187193.8	MT1X	protein_coding	80.1855	1.63153	0.297155	5.49051	4.00785e-08	5.65482e-07	Up Regulated in Acute
ENSG00000173812.10	EIF1	protein_coding	17053.6	-1.1505	0.209626	-5.48832	4.05779e-08	5.72054e-07	Down Regulated in Acute
ENSG00000176619.10	LMNB2	protein_coding	316.222	1.11379	0.202968	5.48751	4.07632e-08	5.74191e-07	Up Regulated in Acute
ENSG00000243649.8	CFB	protein_coding	13.6751	3.70578	0.675406	5.48674	4.09423e-08	5.76237e-07	Up Regulated in Acute
ENSG00000147912.12	FBXO10	protein_coding	72.4144	1.3299	0.242508	5.48396	4.15898e-08	5.84384e-07	Up Regulated in Acute
ENSG00000197903.7	HIST1H2BK	protein_coding	230.148	1.49513	0.272635	5.48401	4.15794e-08	5.84384e-07	Up Regulated in Acute
ENSG00000132793.11	LPIN3	protein_coding	20.5511	2.64074	0.481697	5.48216	4.2e-08	5.89897e-07	Up Regulated in Acute
ENSG00000151729.10	SLC25A4	protein_coding	250.111	1.77682	0.324161	5.48129	4.22224e-08	5.91809e-07	Up Regulated in Acute
ENSG00000182230.11	FAM153B	protein_coding	89.3562	-1.56374	0.285285	-5.48131	4.22187e-08	5.91809e-07	Down Regulated in Acute
ENSG00000186350.9	RXRA	protein_coding	2238.59	-1.05486	0.192516	-5.47932	4.26959e-08	5.98e-07	Down Regulated in Acute
ENSG00000128654.13	MTX2	protein_coding	334.764	1.01385	0.185038	5.47915	4.27385e-08	5.98058e-07	Up Regulated in Acute
ENSG00000100764.13	PSMC1	protein_coding	1824.25	0.757233	0.138229	5.47811	4.3e-08	6.01089e-07	Up Regulated in Acute
ENSG00000119699.7	TGFB3	protein_coding	78.5591	-1.24871	0.228121	-5.47387	4.4e-08	6.1514e-07	Down Regulated in Acute
ENSG00000215252.11	GOLGA8B	protein_coding	2074.99	-0.81237	0.148441	-5.47267	4.4331e-08	6.1831e-07	Down Regulated in Acute
ENSG00000259803.6	SLC22A31	protein_coding	15.7911	2.89914	0.529737	5.47279	4.42999e-08	6.1831e-07	Up Regulated in Acute
ENSG00000172059.10	KLF11	protein_coding	830.258	-1.41511	0.258588	-5.47242	4.43919e-08	6.18653e-07	Down Regulated in Acute
ENSG00000101464.10	PIGU	protein_coding	268.515	0.843056	0.154159	5.46873	4.53263e-08	6.31159e-07	Up Regulated in Acute
ENSG00000178295.14	GEN1	protein_coding	579.345	1.23947	0.226664	5.46832	4.54314e-08	6.32105e-07	Up Regulated in Acute
ENSG00000153815.16	CMIP	protein_coding	1532.8	-1.2099	0.221276	-5.46786	4.55506e-08	6.33247e-07	Down Regulated in Acute
ENSG00000110079.16	MS4A4A	protein_coding	690.371	1.89724	0.347051	5.46675	4.58349e-08	6.3668e-07	Up Regulated in Acute
ENSG00000154736.5	ADAMTS5	protein_coding	9.9882	-5.60852	1.02609	-5.4659	4.60561e-08	6.3923e-07	Down Regulated in Acute
ENSG00000149929.15	HIRIP3	protein_coding	359.63	0.948934	0.173627	5.46536	4.61971e-08	6.40665e-07	Up Regulated in Acute
ENSG00000171428.13	NAT1	protein_coding	141.52	1.49689	0.273904	5.46501	4.62887e-08	6.41413e-07	Up Regulated in Acute
ENSG00000100522.8	GNPNAT1	protein_coding	244.78	1.03454	0.189423	5.46154	4.72014e-08	6.53529e-07	Up Regulated in Acute
ENSG00000140650.11	PMM2	protein_coding	292.08	1.5481	0.283481	5.46105	4.7333e-08	6.54645e-07	Up Regulated in Acute
ENSG00000182621.16	PLCB1	protein_coding	136.282	-1.76496	0.323196	-5.46095	4.73589e-08	6.54645e-07	Down Regulated in Acute
ENSG00000100297.15	MCM5	protein_coding	1434.72	1.03396	0.189372	5.45995	4.76278e-08	6.57827e-07	Up Regulated in Acute
ENSG00000072071.16	ADGRL1	protein_coding	190.387	-1.38216	0.253422	-5.45396	4.92603e-08	6.79825e-07	Down Regulated in Acute
ENSG00000164440.14	TXLNB	protein_coding	39.9382	1.54567	0.283466	5.45275	4.95964e-08	6.83908e-07	Up Regulated in Acute
ENSG00000128383.12	APOBEC3A	protein_coding	3307.45	1.42433	0.261404	5.44877	5.07204e-08	6.98842e-07	Up Regulated in Acute
ENSG00000134697.12	GNL2	protein_coding	1377.86	0.702993	0.129043	5.44773	5.1e-08	7.02352e-07	Up Regulated in Acute
ENSG00000108344.14	PSMD3	protein_coding	1551.43	0.637018	0.11704	5.44272	5.24725e-08	7.21232e-07	Up Regulated in Acute
ENSG00000185896.10	LAMP1	protein_coding	2505.08	-0.862683	0.158498	-5.44285	5.24357e-08	7.21232e-07	Down Regulated in Acute
ENSG00000112033.13	PPARD	protein_coding	497.653	-0.902811	0.165932	-5.44086	5.3e-08	7.28209e-07	Down Regulated in Acute
ENSG00000100242.15	SUN2	protein_coding	5046.57	-0.885807	0.162855	-5.43924	5.35091e-08	7.34295e-07	Down Regulated in Acute
ENSG00000131871.14	VIMP	protein_coding	1340.31	1.36828	0.25161	5.4381	5.38513e-08	7.38396e-07	Up Regulated in Acute
ENSG00000166986.12	MARS	protein_coding	3528.06	0.717017	0.131876	5.43704	5.41741e-08	7.42224e-07	Up Regulated in Acute
ENSG00000063127.15	SLC6A16	protein_coding	108.26	-1.16611	0.214549	-5.43517	5.47427e-08	7.4881e-07	Down Regulated in Acute
ENSG00000167992.12	VWCE	protein_coding	11.1567	3.46191	0.636931	5.43529	5.47063e-08	7.4881e-07	Up Regulated in Acute
ENSG00000139289.13	PHLDA1	protein_coding	74.9862	-1.4661	0.269767	-5.43471	5.48859e-08	7.50166e-07	Down Regulated in Acute
ENSG00000178966.15	RMI1	protein_coding	149.994	1.14482	0.210752	5.43208	5.57012e-08	7.60699e-07	Up Regulated in Acute
ENSG00000124731.12	TREM1	protein_coding	826.746	-1.51295	0.278547	-5.43157	5.58604e-08	7.62261e-07	Down Regulated in Acute
ENSG00000142102.15	ATHL1	protein_coding	4164.04	-1.19233	0.219548	-5.43086	5.60825e-08	7.6468e-07	Down Regulated in Acute
ENSG00000198804.2	MT-CO1	protein_coding	462197	0.789977	0.145476	5.4303	5.62581e-08	7.6646e-07	Up Regulated in Acute
ENSG00000163468.14	CCT3	protein_coding	3043.85	0.868496	0.159959	5.42948	5.65182e-08	7.69388e-07	Up Regulated in Acute
ENSG00000117450.13	PRDX1	protein_coding	4171.34	1.11491	0.205785	5.41785	6.03208e-08	8.20498e-07	Up Regulated in Acute
ENSG00000118922.16	KLF12	protein_coding	927.375	-0.992484	0.183293	-5.41475	6.13738e-08	8.34154e-07	Down Regulated in Acute
ENSG00000117593.9	DARS2	protein_coding	348.33	1.60374	0.296287	5.4128	6.2e-08	8.42649e-07	Up Regulated in Acute
ENSG00000174652.17	ZNF266	protein_coding	2481.63	-0.62971	0.116343	-5.41253	6.21404e-08	8.43228e-07	Down Regulated in Acute
ENSG00000064201.15	TSPAN32	protein_coding	959.318	-1.11172	0.205491	-5.41006	6.3e-08	8.54278e-07	Down Regulated in Acute
ENSG00000142156.14	COL6A1	protein_coding	32.7711	-2.04249	0.377677	-5.40802	6.37237e-08	8.63337e-07	Down Regulated in Acute
ENSG00000023318.7	ERP44	protein_coding	2619.33	0.713812	0.131998	5.40776	6.38186e-08	8.63936e-07	Up Regulated in Acute
ENSG00000196968.10	FUT11	protein_coding	516.011	-1.11343	0.205978	-5.40559	6.4596e-08	8.73765e-07	Down Regulated in Acute
ENSG00000168487.17	BMP1	protein_coding	92.6664	-1.10732	0.204946	-5.40296	6.55487e-08	8.85948e-07	Down Regulated in Acute
ENSG00000164530.13	PI16	protein_coding	60.175	-1.82069	0.33725	-5.39863	6.71498e-08	9.06869e-07	Down Regulated in Acute
ENSG00000236609.3	ZNF853	protein_coding	71.4234	-1.86848	0.346154	-5.39783	6.74535e-08	9.10248e-07	Down Regulated in Acute
ENSG00000163346.16	PBXIP1	protein_coding	3687.32	-0.745518	0.138125	-5.39742	6.76046e-08	9.11565e-07	Down Regulated in Acute
ENSG00000121406.8	ZNF549	protein_coding	155.564	-0.893731	0.165622	-5.3962	6.80653e-08	9.17051e-07	Down Regulated in Acute
ENSG00000132780.16	NASP	protein_coding	2442.99	0.939424	0.174106	5.39572	6.82503e-08	9.18816e-07	Up Regulated in Acute
ENSG00000106066.13	CPVL	protein_coding	5825.67	-1.13263	0.209975	-5.39409	6.88717e-08	9.26449e-07	Down Regulated in Acute
ENSG00000161813.20	LARP4	protein_coding	508.052	1.48641	0.275578	5.39379	6.9e-08	9.27288e-07	Up Regulated in Acute
ENSG00000105875.13	WDR91	protein_coding	675.746	-0.776425	0.143983	-5.39247	6.94964e-08	9.32797e-07	Down Regulated in Acute
ENSG00000151490.13	PTPRO	protein_coding	418.658	1.25022	0.231847	5.39244	6.95079e-08	9.32797e-07	Up Regulated in Acute
ENSG00000139714.12	MORN3	protein_coding	81.9612	-1.68116	0.311817	-5.39149	6.98751e-08	9.36628e-07	Down Regulated in Acute
ENSG00000144815.14	NXPE3	protein_coding	1269.34	0.774172	0.143593	5.39142	6.99033e-08	9.36628e-07	Up Regulated in Acute
ENSG00000075340.22	ADD2	protein_coding	103.075	-1.32848	0.246448	-5.39049	7.02642e-08	9.40722e-07	Down Regulated in Acute
ENSG00000113790.10	EHHADH	protein_coding	44.5899	1.71883	0.319001	5.38816	7.1183e-08	9.52276e-07	Up Regulated in Acute
ENSG00000139163.15	ETNK1	protein_coding	859.644	0.944961	0.17551	5.3841	7.28067e-08	9.73233e-07	Up Regulated in Acute
ENSG00000162520.14	SYNC	protein_coding	16.8694	3.97083	0.737572	5.38365	7.3e-08	9.74946e-07	Up Regulated in Acute
ENSG00000164620.8	RELL2	protein_coding	388.372	1.19245	0.221759	5.37723	7.56395e-08	1.00952e-06	Up Regulated in Acute
ENSG00000130413.15	STK33	protein_coding	30.6536	2.11344	0.393235	5.3745	7.6794e-08	1.02412e-06	Up Regulated in Acute
ENSG00000113356.10	POLR3G	protein_coding	48.1932	1.98389	0.369662	5.36677	8.01587e-08	1.06816e-06	Up Regulated in Acute
ENSG00000184451.5	CCR10	protein_coding	16.7627	2.73875	0.51057	5.3641	8.13548e-08	1.08325e-06	Up Regulated in Acute
ENSG00000159176.13	CSRP1	protein_coding	1463.25	0.503122	0.0937981	5.36388	8.14526e-08	1.0837e-06	Up Regulated in Acute
ENSG00000186567.12	CEACAM19	protein_coding	36.3861	-2.082	0.388246	-5.36259	8.2e-08	1.09065e-06	Down Regulated in Acute
ENSG00000105976.14	MET	protein_coding	19.9357	4.77102	0.889984	5.36079	8.28597e-08	1.1007e-06	Up Regulated in Acute
ENSG00000077238.13	IL4R	protein_coding	2643.55	-0.849155	0.158513	-5.357	8.46173e-08	1.12317e-06	Down Regulated in Acute
ENSG00000124641.14	MED20	protein_coding	293.457	0.968052	0.180742	5.356	8.50863e-08	1.12852e-06	Up Regulated in Acute
ENSG00000135960.9	EDAR	protein_coding	68.0319	-2.10411	0.39289	-5.35547	8.53366e-08	1.131e-06	Down Regulated in Acute
ENSG00000116106.11	EPHA4	protein_coding	179.556	-1.65773	0.309665	-5.35331	8.6361e-08	1.14365e-06	Down Regulated in Acute
ENSG00000099139.13	PCSK5	protein_coding	223.626	-1.13004	0.211178	-5.35113	8.74069e-08	1.1566e-06	Down Regulated in Acute
ENSG00000108691.9	CCL2	protein_coding	158.678	4.78459	0.894155	5.35096	8.74887e-08	1.15678e-06	Up Regulated in Acute
ENSG00000171954.12	CYP4F22	protein_coding	57.5102	-1.60924	0.300762	-5.35055	8.76892e-08	1.15853e-06	Down Regulated in Acute
ENSG00000271503.5	CCL5	protein_coding	6839.7	-1.58003	0.295351	-5.34968	8.81112e-08	1.1632e-06	Down Regulated in Acute
ENSG00000168214.20	RBPJ	protein_coding	1969.23	-0.773027	0.144521	-5.34889	8.84963e-08	1.16738e-06	Down Regulated in Acute
ENSG00000136111.12	TBC1D4	protein_coding	1029.41	-0.950159	0.177706	-5.3468	8.95209e-08	1.18e-06	Down Regulated in Acute
ENSG00000163508.12	EOMES	protein_coding	385.066	-1.21829	0.227952	-5.3445	9.0666e-08	1.19415e-06	Down Regulated in Acute
ENSG00000090520.10	DNAJB11	protein_coding	2884.02	1.5047	0.281674	5.34198	9.19347e-08	1.20993e-06	Up Regulated in Acute
ENSG00000187764.11	SEMA4D	protein_coding	3933.92	-0.868326	0.162576	-5.34104	9.24145e-08	1.2153e-06	Down Regulated in Acute
ENSG00000188229.5	TUBB4B	protein_coding	1471.41	1.02756	0.192462	5.33903	9.34456e-08	1.22792e-06	Up Regulated in Acute
ENSG00000167768.4	KRT1	protein_coding	42.8536	-3.66501	0.686481	-5.33883	9.35468e-08	1.2283e-06	Down Regulated in Acute
ENSG00000204257.14	HLA-DMA	protein_coding	5718.47	-0.773949	0.145071	-5.33498	9.55528e-08	1.25367e-06	Down Regulated in Acute
ENSG00000204852.15	TCTN1	protein_coding	195.815	-1.22479	0.22961	-5.33423	9.6e-08	1.25792e-06	Down Regulated in Acute
ENSG00000123374.10	CDK2	protein_coding	498.371	1.10949	0.208027	5.33339	9.63966e-08	1.2628e-06	Up Regulated in Acute
ENSG00000148842.17	CNNM2	protein_coding	147.77	-1.02679	0.192806	-5.32552	1.00665e-07	1.3177e-06	Down Regulated in Acute
ENSG00000008710.17	PKD1	protein_coding	357.596	-1.00863	0.1895	-5.32261	1.02292e-07	1.338e-06	Down Regulated in Acute
ENSG00000109452.12	INPP4B	protein_coding	456.05	-1.3231	0.248812	-5.31767	1.05102e-07	1.37367e-06	Down Regulated in Acute
ENSG00000064547.13	LPAR2	protein_coding	796.434	-1.5935	0.299713	-5.31675	1.05635e-07	1.37958e-06	Down Regulated in Acute
ENSG00000144711.13	IQSEC1	protein_coding	3074.64	-0.750623	0.141192	-5.31632	1.05887e-07	1.38181e-06	Down Regulated in Acute
ENSG00000138658.15	ZGRF1	protein_coding	305.345	0.905291	0.170345	5.31445	1.07e-07	1.395e-06	Up Regulated in Acute
ENSG00000136250.11	AOAH	protein_coding	4205.97	-1.00932	0.189925	-5.31431	1.07064e-07	1.395e-06	Down Regulated in Acute
ENSG00000151849.14	CENPJ	protein_coding	371.299	1.21317	0.228295	5.31402	1.07233e-07	1.39616e-06	Up Regulated in Acute
ENSG00000167881.14	SRP68	protein_coding	1850.38	0.736947	0.138699	5.31327	1.07678e-07	1.39981e-06	Up Regulated in Acute
ENSG00000221946.7	FXYD7	protein_coding	31.1843	-2.25396	0.424211	-5.3133	1.07658e-07	1.39981e-06	Down Regulated in Acute
ENSG00000123636.17	BAZ2B	protein_coding	683.577	-1.01381	0.190947	-5.30939	1.1e-07	1.42882e-06	Down Regulated in Acute
ENSG00000158109.14	TPRG1L	protein_coding	808.647	-0.59875	0.112856	-5.30541	1.12418e-07	1.45921e-06	Down Regulated in Acute
ENSG00000182534.13	MXRA7	protein_coding	186.862	-1.31632	0.248499	-5.29706	1.17681e-07	1.52635e-06	Down Regulated in Acute
ENSG00000154358.19	OBSCN	protein_coding	310.697	-1.42	0.268109	-5.29637	1.18129e-07	1.531e-06	Down Regulated in Acute
ENSG00000141646.13	SMAD4	protein_coding	955.695	-0.605541	0.114433	-5.29165	1.21217e-07	1.56983e-06	Down Regulated in Acute
ENSG00000090975.12	PITPNM2	protein_coding	205.198	-1.15036	0.217417	-5.29101	1.2164e-07	1.57411e-06	Down Regulated in Acute
ENSG00000100918.12	REC8	protein_coding	743.472	0.821015	0.155239	5.2887	1.2319e-07	1.593e-06	Up Regulated in Acute
ENSG00000135925.8	WNT10A	protein_coding	39.1726	1.64443	0.310973	5.288	1.23663e-07	1.59786e-06	Up Regulated in Acute
ENSG00000127423.10	AUNIP	protein_coding	20.4911	2.76762	0.523464	5.28712	1.24259e-07	1.60313e-06	Up Regulated in Acute
ENSG00000136143.13	SUCLA2	protein_coding	341.624	1.17112	0.221503	5.28714	1.24241e-07	1.60313e-06	Up Regulated in Acute
ENSG00000170027.6	YWHAG	protein_coding	1740.5	1.05455	0.199499	5.286	1.25e-07	1.61172e-06	Up Regulated in Acute
ENSG00000274211.4	SOCS7	protein_coding	351.647	-0.859346	0.162596	-5.28518	1.25583e-07	1.61777e-06	Down Regulated in Acute
ENSG00000125898.12	FAM110A	protein_coding	478.842	-1.3544	0.256312	-5.28418	1.26268e-07	1.62441e-06	Down Regulated in Acute
ENSG00000171596.6	NMUR1	protein_coding	136.672	-2.17064	0.410783	-5.28415	1.2629e-07	1.62441e-06	Down Regulated in Acute
ENSG00000181350.11	LRRC75A	protein_coding	73.9797	-1.47183	0.278659	-5.28184	1.27896e-07	1.64383e-06	Down Regulated in Acute
ENSG00000126453.9	BCL2L12	protein_coding	195.603	1.23227	0.233324	5.28138	1.28212e-07	1.64665e-06	Up Regulated in Acute
ENSG00000058866.14	DGKG	protein_coding	150.728	-1.31429	0.248919	-5.28	1.29182e-07	1.65785e-06	Down Regulated in Acute
ENSG00000171033.12	PKIA	protein_coding	123.825	-0.817259	0.154963	-5.2739	1.33551e-07	1.71264e-06	Down Regulated in Acute
ENSG00000115607.9	IL18RAP	protein_coding	743.092	-0.777369	0.147419	-5.27318	1.34078e-07	1.71809e-06	Down Regulated in Acute
ENSG00000120949.14	TNFRSF8	protein_coding	241.442	-1.51392	0.287193	-5.27143	1.35365e-07	1.73328e-06	Down Regulated in Acute
ENSG00000138376.10	BARD1	protein_coding	164.048	1.02457	0.194395	5.27055	1.36e-07	1.74031e-06	Up Regulated in Acute
ENSG00000132481.6	TRIM47	protein_coding	45.6453	2.24644	0.426373	5.26873	1.37374e-07	1.75637e-06	Up Regulated in Acute
ENSG00000101773.16	RBBP8	protein_coding	555.672	1.08348	0.205735	5.26639	1.39129e-07	1.77748e-06	Up Regulated in Acute
ENSG00000079999.13	KEAP1	protein_coding	566.47	0.910626	0.172943	5.26546	1.39838e-07	1.78519e-06	Up Regulated in Acute
ENSG00000025770.18	NCAPH2	protein_coding	673.502	0.753054	0.143027	5.26511	1.40106e-07	1.78727e-06	Up Regulated in Acute
ENSG00000100519.11	PSMC6	protein_coding	1500.36	0.628674	0.11941	5.26483	1.40321e-07	1.78868e-06	Up Regulated in Acute
ENSG00000166428.12	PLD4	protein_coding	245.488	-1.64365	0.312222	-5.26438	1.40664e-07	1.7917e-06	Down Regulated in Acute
ENSG00000092096.14	SLC22A17	protein_coding	41.8003	-1.63432	0.310587	-5.26203	1.42472e-07	1.81337e-06	Down Regulated in Acute
ENSG00000129083.12	COPB1	protein_coding	2402.3	0.887025	0.168615	5.26066	1.43538e-07	1.82558e-06	Up Regulated in Acute
ENSG00000108306.11	FBXL20	protein_coding	599.877	-0.857679	0.163124	-5.25783	1.45762e-07	1.8511e-06	Down Regulated in Acute
ENSG00000130303.12	BST2	protein_coding	3213.21	0.914566	0.173941	5.25789	1.45715e-07	1.8511e-06	Up Regulated in Acute
ENSG00000143184.4	XCL1	protein_coding	59.4714	-1.9668	0.374107	-5.25731	1.46179e-07	1.85247e-06	Down Regulated in Acute
ENSG00000152256.13	PDK1	protein_coding	1093.41	1.09714	0.208689	5.25729	1.46196e-07	1.85247e-06	Up Regulated in Acute
ENSG00000197323.10	TRIM33	protein_coding	1346.85	-0.76469	0.145448	-5.2575	1.46e-07	1.85247e-06	Down Regulated in Acute
ENSG00000134317.17	GRHL1	protein_coding	23.7724	1.77265	0.337425	5.25345	1.49275e-07	1.88867e-06	Up Regulated in Acute
ENSG00000136960.12	ENPP2	protein_coding	112.837	2.39262	0.455438	5.25345	1.49274e-07	1.88867e-06	Up Regulated in Acute
ENSG00000131067.16	GGT7	protein_coding	346.598	-0.975523	0.185787	-5.25076	1.51474e-07	1.91507e-06	Down Regulated in Acute
ENSG00000138207.12	RBP4	protein_coding	6.33839	3.96646	0.755642	5.24913	1.5282e-07	1.93066e-06	Up Regulated in Acute
ENSG00000092758.15	COL9A3	protein_coding	59.4571	2.37554	0.452608	5.24856	1.53295e-07	1.93522e-06	Up Regulated in Acute
ENSG00000144040.12	SFXN5	protein_coding	381.416	-0.614396	0.11707	-5.2481	1.53674e-07	1.93857e-06	Down Regulated in Acute
ENSG00000260314.2	MRC1	protein_coding	47.4248	-1.73558	0.33096	-5.24408	1.57065e-07	1.97988e-06	Down Regulated in Acute
ENSG00000243772.6	KIR2DL3	protein_coding	51.2866	-2.17458	0.414699	-5.24376	1.57337e-07	1.98184e-06	Down Regulated in Acute
ENSG00000255221.2	CARD17	protein_coding	29.1965	2.11059	0.402522	5.24342	1.57629e-07	1.984e-06	Up Regulated in Acute
ENSG00000100351.16	GRAP2	protein_coding	945.941	-1.11067	0.211884	-5.24189	1.58944e-07	1.99912e-06	Down Regulated in Acute
ENSG00000275713.1	HIST1H2BH	protein_coding	28.8338	2.59667	0.495577	5.23969	1.60849e-07	2.0216e-06	Up Regulated in Acute
ENSG00000107949.16	BCCIP	protein_coding	994.691	0.844739	0.16125	5.23868	1.61727e-07	2.03113e-06	Up Regulated in Acute
ENSG00000127418.14	FGFRL1	protein_coding	178.622	-1.62903	0.310991	-5.23819	1.62161e-07	2.03508e-06	Down Regulated in Acute
ENSG00000105982.16	RNF32	protein_coding	11.7607	2.29742	0.438757	5.23619	1.63924e-07	2.05569e-06	Up Regulated in Acute
ENSG00000172009.14	THOP1	protein_coding	269.406	0.944723	0.180437	5.23576	1.64311e-07	2.059e-06	Up Regulated in Acute
ENSG00000212907.2	MT-ND4L	protein_coding	20097.4	1.55753	0.297709	5.23173	1.67931e-07	2.10284e-06	Up Regulated in Acute
ENSG00000100731.15	PCNX	protein_coding	1749.12	-0.672263	0.12851	-5.2312	1.68411e-07	2.107e-06	Down Regulated in Acute
ENSG00000134716.9	CYP2J2	protein_coding	18.6527	2.74607	0.524952	5.23109	1.68514e-07	2.107e-06	Up Regulated in Acute
ENSG00000181894.14	ZNF329	protein_coding	167.54	-1.51203	0.289155	-5.22915	1.7029e-07	2.12769e-06	Down Regulated in Acute
ENSG00000141293.15	SKAP1	protein_coding	1010.84	-1.28824	0.246492	-5.22631	1.72926e-07	2.159e-06	Down Regulated in Acute
ENSG00000059573.8	ALDH18A1	protein_coding	817.06	1.51512	0.290171	5.22147	1.7751e-07	2.21465e-06	Up Regulated in Acute
ENSG00000120802.13	TMPO	protein_coding	2428.55	0.850509	0.162911	5.2207	1.78251e-07	2.22226e-06	Up Regulated in Acute
ENSG00000092108.20	SCFD1	protein_coding	1335.91	0.956111	0.183309	5.21584	1.83e-07	2.27958e-06	Up Regulated in Acute
ENSG00000157870.14	FAM213B	protein_coding	213.336	-0.815232	0.156369	-5.21352	1.85291e-07	2.30665e-06	Down Regulated in Acute
ENSG00000198189.10	HSD17B11	protein_coding	1747.71	-0.984807	0.188904	-5.21326	1.85553e-07	2.30824e-06	Down Regulated in Acute
ENSG00000119866.20	BCL11A	protein_coding	300.646	-0.98162	0.188344	-5.21186	1.87e-07	2.32405e-06	Down Regulated in Acute
ENSG00000168792.4	ABHD15	protein_coding	465.968	-0.738287	0.141664	-5.21153	1.87286e-07	2.32639e-06	Down Regulated in Acute
ENSG00000178789.8	CD300LB	protein_coding	911.822	-1.38154	0.265113	-5.21113	1.87695e-07	2.32977e-06	Down Regulated in Acute
ENSG00000143842.14	SOX13	protein_coding	89.3731	-2.03443	0.390439	-5.21064	1.8819e-07	2.33421e-06	Down Regulated in Acute
ENSG00000146143.17	PRIM2	protein_coding	217.48	1.13821	0.2185	5.20921	1.89642e-07	2.35051e-06	Up Regulated in Acute
ENSG00000176049.15	JAKMIP2	protein_coding	85.5368	-1.93217	0.370992	-5.20812	1.90768e-07	2.36274e-06	Down Regulated in Acute
ENSG00000183150.7	GPR19	protein_coding	34.9437	1.71567	0.329437	5.2079	1.91e-07	2.36379e-06	Up Regulated in Acute
ENSG00000072786.12	STK10	protein_coding	5282.58	-0.709452	0.136288	-5.20554	1.93435e-07	2.3923e-06	Down Regulated in Acute
ENSG00000204315.3	FKBPL	protein_coding	89.5363	1.496	0.287459	5.20423	1.94802e-07	2.40746e-06	Up Regulated in Acute
ENSG00000166197.16	NOLC1	protein_coding	1518.08	0.516496	0.0992686	5.20302	1.96075e-07	2.42144e-06	Up Regulated in Acute
ENSG00000143106.12	PSMA5	protein_coding	2908.98	1.00772	0.193701	5.20246	1.96663e-07	2.42693e-06	Up Regulated in Acute
ENSG00000116406.18	EDEM3	protein_coding	1154.11	1.05204	0.202225	5.20233	1.9681e-07	2.427e-06	Up Regulated in Acute
ENSG00000158828.5	PINK1	protein_coding	469.632	-0.790755	0.15203	-5.20129	1.97905e-07	2.43873e-06	Down Regulated in Acute
ENSG00000154864.11	PIEZO2	protein_coding	6.66519	5.2253	1.00489	5.19988	1.99414e-07	2.45378e-06	Up Regulated in Acute
ENSG00000157823.16	AP3S2	protein_coding	286.048	-0.806818	0.155157	-5.19999	1.99295e-07	2.45378e-06	Down Regulated in Acute
ENSG00000154822.15	PLCL2	protein_coding	1557.51	-0.472985	0.0909746	-5.19909	2.00268e-07	2.4625e-06	Down Regulated in Acute
ENSG00000143799.12	PARP1	protein_coding	3357.93	1.10095	0.211776	5.19865	2.00741e-07	2.46654e-06	Up Regulated in Acute
ENSG00000198408.13	MGEA5	protein_coding	6943.06	-0.728401	0.140128	-5.1981	2.01338e-07	2.47209e-06	Down Regulated in Acute
ENSG00000082212.11	ME2	protein_coding	1444.6	0.874446	0.168254	5.19717	2.02347e-07	2.48269e-06	Up Regulated in Acute
ENSG00000255398.2	HCAR3	protein_coding	105.12	-3.08297	0.593277	-5.19651	2.03068e-07	2.48974e-06	Down Regulated in Acute
ENSG00000174516.14	PELI3	protein_coding	162.322	-1.43488	0.276144	-5.19614	2.03473e-07	2.49291e-06	Down Regulated in Acute
ENSG00000181026.14	AEN	protein_coding	732.574	0.86742	0.166941	5.19597	2.03653e-07	2.49333e-06	Up Regulated in Acute
ENSG00000137393.9	RNF144B	protein_coding	1119.86	-1.19482	0.230003	-5.1948	2.0494e-07	2.50728e-06	Down Regulated in Acute
ENSG00000104419.14	NDRG1	protein_coding	2016.46	-0.825545	0.158935	-5.19424	2.05559e-07	2.51124e-06	Down Regulated in Acute
ENSG00000269858.5	EGLN2	protein_coding	567.4	-1.07554	0.207058	-5.19437	2.05413e-07	2.51124e-06	Down Regulated in Acute
ENSG00000138378.17	STAT4	protein_coding	1272.26	-0.853707	0.164362	-5.19406	2.05759e-07	2.51189e-06	Down Regulated in Acute
ENSG00000135070.13	ISCA1	protein_coding	514.207	-0.76172	0.146725	-5.1915	2.0861e-07	2.54486e-06	Down Regulated in Acute
ENSG00000154642.10	C21orf91	protein_coding	497.489	0.892623	0.17196	5.19088	2.09308e-07	2.55155e-06	Up Regulated in Acute
ENSG00000163785.12	RYK	protein_coding	454.55	-1.00471	0.193583	-5.1901	2.10181e-07	2.56037e-06	Down Regulated in Acute
ENSG00000125319.14	C17orf53	protein_coding	52.3832	2.26293	0.43603	5.18985	2.1046e-07	2.56192e-06	Up Regulated in Acute
ENSG00000011523.13	CEP68	protein_coding	327.863	-1.04624	0.201765	-5.18542	2.15532e-07	2.62179e-06	Down Regulated in Acute
ENSG00000035928.14	RFC1	protein_coding	1112.71	0.732822	0.141348	5.18451	2.16582e-07	2.63268e-06	Up Regulated in Acute
ENSG00000133101.9	CCNA1	protein_coding	11.1886	5.26241	1.01546	5.18227	2.19202e-07	2.66263e-06	Up Regulated in Acute
ENSG00000124570.17	SERPINB6	protein_coding	1922.36	-0.906845	0.175039	-5.18081	2.20925e-07	2.68165e-06	Down Regulated in Acute
ENSG00000031691.6	CENPQ	protein_coding	84.4761	1.77861	0.343722	5.17456	2.28454e-07	2.77106e-06	Up Regulated in Acute
ENSG00000186815.12	TPCN1	protein_coding	1406.84	-0.986241	0.190608	-5.17419	2.28906e-07	2.77457e-06	Down Regulated in Acute
ENSG00000099308.10	MAST3	protein_coding	1364.52	-0.951031	0.18381	-5.17399	2.29143e-07	2.77547e-06	Down Regulated in Acute
ENSG00000068028.17	RASSF1	protein_coding	2082.38	-0.998053	0.192911	-5.17363	2.29584e-07	2.77883e-06	Down Regulated in Acute
ENSG00000104626.14	ERI1	protein_coding	352.983	1.1482	0.221942	5.17342	2.29853e-07	2.78011e-06	Up Regulated in Acute
ENSG00000165934.12	CPSF2	protein_coding	1079.9	0.863841	0.167041	5.17142	2.32326e-07	2.808e-06	Up Regulated in Acute
ENSG00000173039.18	RELA	protein_coding	1565.75	-0.695854	0.134569	-5.171	2.32848e-07	2.81234e-06	Down Regulated in Acute
ENSG00000105011.8	ASF1B	protein_coding	346.251	1.8816	0.364031	5.16879	2.3562e-07	2.8438e-06	Up Regulated in Acute
ENSG00000172172.7	MRPL13	protein_coding	549.431	1.06483	0.206018	5.16861	2.35839e-07	2.84443e-06	Up Regulated in Acute
ENSG00000160949.16	TONSL	protein_coding	127.312	1.73321	0.335402	5.16757	2.37161e-07	2.85835e-06	Up Regulated in Acute
ENSG00000134490.13	TMEM241	protein_coding	88.7929	1.38634	0.268471	5.16385	2.41924e-07	2.91369e-06	Up Regulated in Acute
ENSG00000146070.16	PLA2G7	protein_coding	395.587	-1.25309	0.242809	-5.16083	2.45859e-07	2.959e-06	Down Regulated in Acute
ENSG00000204592.8	HLA-E	protein_coding	33977.4	-0.538439	0.104344	-5.16025	2.46623e-07	2.96609e-06	Down Regulated in Acute
ENSG00000166275.15	C10orf32	protein_coding	420.041	-1.10291	0.213889	-5.15644	2.51688e-07	3.02488e-06	Down Regulated in Acute
ENSG00000159714.10	ZDHHC1	protein_coding	39.4887	-1.77577	0.344452	-5.15535	2.53158e-07	3.04039e-06	Down Regulated in Acute
ENSG00000125505.16	MBOAT7	protein_coding	1067.69	-0.705595	0.136982	-5.15099	2.5912e-07	3.1098e-06	Down Regulated in Acute
ENSG00000160185.13	UBASH3A	protein_coding	392.782	-1.066	0.206983	-5.15017	2.60257e-07	3.12125e-06	Down Regulated in Acute
ENSG00000163960.11	UBXN7	protein_coding	1193.35	-0.79183	0.153922	-5.14437	2.68419e-07	3.21687e-06	Down Regulated in Acute
ENSG00000183283.15	DAZAP2	protein_coding	10511.2	-0.686865	0.133544	-5.14338	2.6984e-07	3.23163e-06	Down Regulated in Acute
ENSG00000130021.13	HDHD1	protein_coding	448.983	0.789273	0.15348	5.14253	2.71061e-07	3.24137e-06	Up Regulated in Acute
ENSG00000164362.18	TERT	protein_coding	12.6905	3.39854	0.660857	5.14262	2.70926e-07	3.24137e-06	Up Regulated in Acute
ENSG00000174307.6	PHLDA3	protein_coding	18.0787	2.53659	0.493268	5.14242	2.71224e-07	3.24137e-06	Up Regulated in Acute
ENSG00000100889.11	PCK2	protein_coding	730.756	0.810664	0.157838	5.13605	2.80568e-07	3.35068e-06	Up Regulated in Acute
ENSG00000005187.11	ACSM3	protein_coding	136.804	-1.48098	0.288378	-5.13554	2.81335e-07	3.35749e-06	Down Regulated in Acute
ENSG00000183134.4	PTGDR2	protein_coding	51.1208	-2.14468	0.417688	-5.13465	2.82676e-07	3.37113e-06	Down Regulated in Acute
ENSG00000119523.9	ALG2	protein_coding	525.371	0.972076	0.189357	5.13355	2.84324e-07	3.38841e-06	Up Regulated in Acute
ENSG00000108953.16	YWHAE	protein_coding	4135.8	0.964892	0.187999	5.13244	2.86e-07	3.40618e-06	Up Regulated in Acute
ENSG00000050393.11	MCUR1	protein_coding	422.381	1.05353	0.205281	5.13217	2.86424e-07	3.40836e-06	Up Regulated in Acute
ENSG00000060138.12	YBX3	protein_coding	1432.53	-0.61931	0.120675	-5.13205	2.86598e-07	3.40836e-06	Down Regulated in Acute
ENSG00000110042.7	DTX4	protein_coding	192.403	-1.05903	0.206394	-5.13109	2.88072e-07	3.42349e-06	Down Regulated in Acute
ENSG00000100105.17	PATZ1	protein_coding	584.602	-0.763824	0.148879	-5.13052	2.8895e-07	3.43153e-06	Down Regulated in Acute
ENSG00000156475.18	PPP2R2B	protein_coding	140.464	-2.09432	0.408418	-5.12788	2.93e-07	3.4775e-06	Down Regulated in Acute
ENSG00000115419.12	GLS	protein_coding	1900.41	0.799412	0.155907	5.1275	2.93607e-07	3.482e-06	Up Regulated in Acute
ENSG00000146085.7	MUT	protein_coding	410.731	0.885548	0.172791	5.12497	2.97586e-07	3.52672e-06	Up Regulated in Acute
ENSG00000145850.8	TIMD4	protein_coding	126.124	3.60593	0.703639	5.12469	2.98e-07	3.52955e-06	Up Regulated in Acute
ENSG00000124151.18	NCOA3	protein_coding	3589.1	0.855539	0.166985	5.12345	3e-07	3.55039e-06	Up Regulated in Acute
ENSG00000138069.16	RAB1A	protein_coding	1733.68	0.701884	0.137085	5.12008	3.05414e-07	3.61194e-06	Up Regulated in Acute
ENSG00000221955.10	SLC12A8	protein_coding	32.2268	2.48469	0.485456	5.11827	3.08348e-07	3.64411e-06	Up Regulated in Acute
ENSG00000143457.10	GOLPH3L	protein_coding	451.647	1.13742	0.222295	5.11671	3.10919e-07	3.67194e-06	Up Regulated in Acute
ENSG00000002933.7	TMEM176A	protein_coding	817.98	-1.18468	0.231681	-5.11343	3.16358e-07	3.73359e-06	Down Regulated in Acute
ENSG00000124882.3	EREG	protein_coding	123.438	-2.98391	0.583839	-5.11084	3.20726e-07	3.78252e-06	Down Regulated in Acute
ENSG00000100612.13	DHRS7	protein_coding	1365.2	-0.721767	0.141381	-5.10511	3.30595e-07	3.89352e-06	Down Regulated in Acute
ENSG00000153044.9	CENPH	protein_coding	124.707	1.64432	0.322085	5.10524	3.30368e-07	3.89352e-06	Up Regulated in Acute
ENSG00000117308.14	GALE	protein_coding	247.367	0.886122	0.173807	5.0983	3.42713e-07	4.03345e-06	Up Regulated in Acute
ENSG00000100290.2	BIK	protein_coding	42.735	2.3799	0.466942	5.09678	3.45487e-07	4.06329e-06	Up Regulated in Acute
ENSG00000055483.19	USP36	protein_coding	1237.48	-0.908218	0.178226	-5.09587	3.47145e-07	4.08e-06	Down Regulated in Acute
ENSG00000072110.13	ACTN1	protein_coding	1211.88	-0.906878	0.178069	-5.09284	3.52738e-07	4.14285e-06	Down Regulated in Acute
ENSG00000158850.14	B4GALT3	protein_coding	1499.75	0.880096	0.172832	5.09221	3.53907e-07	4.15371e-06	Up Regulated in Acute
ENSG00000111186.12	WNT5B	protein_coding	58.7894	1.99978	0.392731	5.09197	3.5437e-07	4.15629e-06	Up Regulated in Acute
ENSG00000189060.5	H1F0	protein_coding	1453.01	1.67002	0.32803	5.09105	3.56093e-07	4.17361e-06	Up Regulated in Acute
ENSG00000176142.12	TMEM39A	protein_coding	670.924	0.855698	0.168238	5.08624	3.6523e-07	4.27776e-06	Up Regulated in Acute
ENSG00000009954.10	BAZ1B	protein_coding	1611.14	0.733837	0.144352	5.08367	3.70216e-07	4.33318e-06	Up Regulated in Acute
ENSG00000165507.8	C10orf10	protein_coding	10.1654	2.74687	0.540398	5.08305	3.71418e-07	4.34426e-06	Up Regulated in Acute
ENSG00000010610.9	CD4	protein_coding	6415.08	-1.05752	0.20806	-5.08275	3.72e-07	4.34818e-06	Down Regulated in Acute
ENSG00000175066.15	GK5	protein_coding	584.947	-0.833499	0.164041	-5.08105	3.75353e-07	4.38427e-06	Down Regulated in Acute
ENSG00000171552.12	BCL2L1	protein_coding	757.719	0.896706	0.176685	5.07516	3.87166e-07	4.51914e-06	Up Regulated in Acute
ENSG00000065413.16	ANKRD44	protein_coding	2439.26	-0.866424	0.170745	-5.07439	3.88745e-07	4.53447e-06	Down Regulated in Acute
ENSG00000178053.17	MLF1	protein_coding	16.6507	-2.4906	0.490853	-5.07402	3.89501e-07	4.54018e-06	Down Regulated in Acute
ENSG00000121236.19	TRIM6	protein_coding	17.4094	3.10631	0.612217	5.07387	3.89805e-07	4.54062e-06	Up Regulated in Acute
ENSG00000151502.10	VPS26B	protein_coding	1501.44	-0.549769	0.1084	-5.07169	3.94305e-07	4.58676e-06	Down Regulated in Acute
ENSG00000197405.7	C5AR1	protein_coding	3147.73	-1.35097	0.266371	-5.07175	3.94179e-07	4.58676e-06	Down Regulated in Acute
ENSG00000088854.12	C20orf194	protein_coding	308.142	-1.09679	0.216272	-5.07136	3.95e-07	4.59156e-06	Down Regulated in Acute
ENSG00000174851.14	YIF1A	protein_coding	411.694	0.956038	0.188534	5.07089	3.96e-07	4.59971e-06	Up Regulated in Acute
ENSG00000158882.12	TOMM40L	protein_coding	502.909	0.66563	0.131311	5.06911	3.99686e-07	4.63984e-06	Up Regulated in Acute
ENSG00000010671.15	BTK	protein_coding	3224.8	0.801945	0.158231	5.0682	4.01598e-07	4.65569e-06	Up Regulated in Acute
ENSG00000167601.11	AXL	protein_coding	72.607	2.79589	0.55165	5.06823	4.01539e-07	4.65569e-06	Up Regulated in Acute
ENSG00000070081.15	NUCB2	protein_coding	1471.67	1.23805	0.244348	5.06674	4.04692e-07	4.68836e-06	Up Regulated in Acute
ENSG00000147535.16	PPAPDC1B	protein_coding	1167.65	1.09451	0.216158	5.06349	4.11654e-07	4.76579e-06	Up Regulated in Acute
ENSG00000134531.9	EMP1	protein_coding	185.109	1.67792	0.331747	5.05784	4.24e-07	4.90581e-06	Up Regulated in Acute
ENSG00000182463.15	TSHZ2	protein_coding	146.6	-1.50414	0.29743	-5.05712	4.25626e-07	4.92085e-06	Down Regulated in Acute
ENSG00000147403.16	RPL10	protein_coding	48835.8	-0.912112	0.180433	-5.05512	4.30115e-07	4.96937e-06	Down Regulated in Acute
ENSG00000004897.11	CDC27	protein_coding	1112.62	0.703294	0.139159	5.05389	4.32912e-07	4.99491e-06	Up Regulated in Acute
ENSG00000138495.6	COX17	protein_coding	516.477	1.0279	0.203387	5.05392	4.32826e-07	4.99491e-06	Up Regulated in Acute
ENSG00000166736.11	HTR3A	protein_coding	12.6953	-3.67679	0.727629	-5.0531	4.34689e-07	5.012e-06	Down Regulated in Acute
ENSG00000105486.13	LIG1	protein_coding	798.807	0.742049	0.146866	5.05256	4.35918e-07	5.02279e-06	Up Regulated in Acute
ENSG00000166965.12	RCCD1	protein_coding	141.173	0.965149	0.191043	5.05199	4.3722e-07	5.03438e-06	Up Regulated in Acute
ENSG00000159479.16	MED8	protein_coding	971.823	0.739436	0.146375	5.05166	4.38e-07	5.03982e-06	Up Regulated in Acute
ENSG00000176083.17	ZNF683	protein_coding	131.273	-1.60615	0.317962	-5.05141	4.38569e-07	5.0431e-06	Down Regulated in Acute
ENSG00000102401.19	ARMCX3	protein_coding	660.107	1.0276	0.203491	5.04985	4.4215e-07	5.08085e-06	Up Regulated in Acute
ENSG00000063046.17	EIF4B	protein_coding	9112.77	-0.753987	0.149352	-5.04838	4.45581e-07	5.11682e-06	Down Regulated in Acute
ENSG00000197746.13	PSAP	protein_coding	54079.4	-0.802949	0.159174	-5.04448	4.54749e-07	5.21858e-06	Down Regulated in Acute
ENSG00000162378.12	ZYG11B	protein_coding	447.435	-0.652775	0.129438	-5.04315	4.5793e-07	5.24805e-06	Down Regulated in Acute
ENSG00000164211.12	STARD4	protein_coding	470.273	1.16875	0.231749	5.04315	4.57933e-07	5.24805e-06	Up Regulated in Acute
ENSG00000025293.15	PHF20	protein_coding	1258.14	-0.859138	0.170419	-5.04132	4.62341e-07	5.295e-06	Down Regulated in Acute
ENSG00000143891.16	GALM	protein_coding	690.796	1.14428	0.227145	5.03767	4.71228e-07	5.39315e-06	Up Regulated in Acute
ENSG00000101294.16	HM13	protein_coding	3557.15	0.936243	0.185884	5.0367	4.73631e-07	5.417e-06	Up Regulated in Acute
ENSG00000165475.13	CRYL1	protein_coding	302.329	-0.998523	0.198387	-5.03319	4.82372e-07	5.51329e-06	Down Regulated in Acute
ENSG00000116337.15	AMPD2	protein_coding	2566.47	-1.02725	0.204171	-5.03133	4.87089e-07	5.56346e-06	Down Regulated in Acute
ENSG00000139174.10	PRICKLE1	protein_coding	84.9582	1.57844	0.313828	5.02963	4.91418e-07	5.60915e-06	Up Regulated in Acute
ENSG00000106367.13	AP1S1	protein_coding	300.659	1.44599	0.287516	5.02925	4.92403e-07	5.61663e-06	Up Regulated in Acute
ENSG00000104894.11	CD37	protein_coding	5491.78	-0.800308	0.159143	-5.02885	4.93439e-07	5.622e-06	Down Regulated in Acute
ENSG00000170469.10	SPATA24	protein_coding	52.1591	1.8732	0.372494	5.02881	4.93532e-07	5.622e-06	Up Regulated in Acute
ENSG00000188676.13	IDO2	protein_coding	17.4171	2.01424	0.40058	5.02831	4.94819e-07	5.63287e-06	Up Regulated in Acute
ENSG00000135424.15	ITGA7	protein_coding	104.817	1.43879	0.286164	5.02786	4.96e-07	5.64235e-06	Up Regulated in Acute
ENSG00000198715.11	GLMP	protein_coding	757.5	0.560952	0.111616	5.02573	5.01511e-07	5.70143e-06	Up Regulated in Acute
ENSG00000166435.15	XRRA1	protein_coding	183.837	1.40698	0.279993	5.02506	5.03278e-07	5.71769e-06	Up Regulated in Acute
ENSG00000167460.14	TPM4	protein_coding	4395.62	0.578122	0.115094	5.02302	5.08645e-07	5.77481e-06	Up Regulated in Acute
ENSG00000007402.11	CACNA2D2	protein_coding	140.414	-1.9301	0.384266	-5.02281	5.09216e-07	5.77744e-06	Down Regulated in Acute
ENSG00000121073.13	SLC35B1	protein_coding	1371.11	0.974623	0.194083	5.02167	5.12234e-07	5.80782e-06	Up Regulated in Acute
ENSG00000143575.14	HAX1	protein_coding	2000.91	0.838131	0.166919	5.02118	5.13563e-07	5.819e-06	Up Regulated in Acute
ENSG00000128283.6	CDC42EP1	protein_coding	52.795	-1.7441	0.347429	-5.02002	5.16666e-07	5.85029e-06	Down Regulated in Acute
ENSG00000132718.8	SYT11	protein_coding	551.531	-0.707189	0.140911	-5.01869	5.20249e-07	5.88693e-06	Down Regulated in Acute
ENSG00000010292.12	NCAPD2	protein_coding	1532.65	0.959674	0.191267	5.01746	5.23593e-07	5.92084e-06	Up Regulated in Acute
ENSG00000154611.14	PSMA8	protein_coding	18.6348	2.37531	0.473432	5.01722	5.24257e-07	5.92278e-06	Up Regulated in Acute
ENSG00000166508.17	MCM7	protein_coding	3093.1	0.971136	0.193564	5.01714	5.2446e-07	5.92278e-06	Up Regulated in Acute
ENSG00000069399.12	BCL3	protein_coding	717.017	-1.22865	0.244981	-5.01526	5.29609e-07	5.977e-06	Down Regulated in Acute
ENSG00000177628.15	GBA	protein_coding	982.072	0.772857	0.154108	5.01503	5.30247e-07	5.9802e-06	Up Regulated in Acute
ENSG00000154144.12	TBRG1	protein_coding	2101.75	-0.40373	0.08053	-5.0134	5.34755e-07	6.02705e-06	Down Regulated in Acute
ENSG00000128059.8	PPAT	protein_coding	199.182	1.80605	0.360328	5.01225	5.38e-07	6.05546e-06	Up Regulated in Acute
ENSG00000167325.14	RRM1	protein_coding	1106.05	1.40103	0.279515	5.01235	5.37694e-07	6.05546e-06	Up Regulated in Acute
ENSG00000140470.13	ADAMTS17	protein_coding	31.928	-1.98401	0.395878	-5.01168	5.3957e-07	6.06927e-06	Down Regulated in Acute
ENSG00000076003.4	MCM6	protein_coding	1089.55	1.48628	0.296638	5.0104	5.4318e-07	6.10585e-06	Up Regulated in Acute
ENSG00000100346.17	CACNA1I	protein_coding	346.677	-1.40279	0.279991	-5.01013	5.43925e-07	6.10616e-06	Down Regulated in Acute
ENSG00000119915.4	ELOVL3	protein_coding	44.8632	2.13413	0.425956	5.01022	5.43681e-07	6.10616e-06	Up Regulated in Acute
ENSG00000113811.10	SELK	protein_coding	1132.41	1.1171	0.223005	5.00928	5.46333e-07	6.12915e-06	Up Regulated in Acute
ENSG00000185608.8	MRPL40	protein_coding	575.939	1.06428	0.212488	5.00866	5.48104e-07	6.145e-06	Up Regulated in Acute
ENSG00000256269.6	HMBS	protein_coding	392.922	1.14464	0.228568	5.00787	5.50361e-07	6.16621e-06	Up Regulated in Acute
ENSG00000071054.15	MAP4K4	protein_coding	2596.03	-0.876673	0.175113	-5.00634	5.54757e-07	6.21138e-06	Down Regulated in Acute
ENSG00000087301.8	TXNDC16	protein_coding	147.021	-0.862458	0.172278	-5.00621	5.5513e-07	6.21148e-06	Down Regulated in Acute
ENSG00000122224.17	LY9	protein_coding	988.689	-0.64705	0.129292	-5.00455	5.59932e-07	6.26109e-06	Down Regulated in Acute
ENSG00000166501.12	PRKCB	protein_coding	5612.24	-0.709948	0.141892	-5.00342	5.63221e-07	6.29374e-06	Down Regulated in Acute
ENSG00000132002.7	DNAJB1	protein_coding	2887.09	-1.3833	0.276576	-5.00153	5.68769e-07	6.35156e-06	Down Regulated in Acute
ENSG00000151012.13	SLC7A11	protein_coding	49.7186	2.43997	0.487929	5.00067	5.71308e-07	6.37574e-06	Up Regulated in Acute
ENSG00000120262.9	CCDC170	protein_coding	93.6904	-1.47632	0.295233	-5.00051	5.71794e-07	6.377e-06	Down Regulated in Acute
ENSG00000131634.13	TMEM204	protein_coding	205.353	-1.49055	0.298099	-5.00018	5.7278e-07	6.3838e-06	Down Regulated in Acute
ENSG00000173193.13	PARP14	protein_coding	6837.32	1.22402	0.244802	5.00002	5.73244e-07	6.38479e-06	Up Regulated in Acute
ENSG00000062822.12	POLD1	protein_coding	200.32	0.995742	0.199321	4.99568	5.86296e-07	6.52163e-06	Up Regulated in Acute
ENSG00000159403.15	C1R	protein_coding	52.0817	1.41978	0.2842	4.99572	5.86176e-07	6.52163e-06	Up Regulated in Acute
ENSG00000134153.9	EMC7	protein_coding	1139.24	1.06997	0.214359	4.99147	5.99212e-07	6.661e-06	Up Regulated in Acute
ENSG00000171466.9	ZNF562	protein_coding	535.03	-0.629736	0.126176	-4.99095	6.00842e-07	6.67471e-06	Down Regulated in Acute
ENSG00000187033.9	SAMD7	protein_coding	8.72322	5.67705	1.13779	4.98953	6.05263e-07	6.71944e-06	Up Regulated in Acute
ENSG00000088179.8	PTPN4	protein_coding	856.328	-0.97485	0.195484	-4.98685	6.13705e-07	6.80873e-06	Down Regulated in Acute
ENSG00000153179.11	RASSF3	protein_coding	2024.62	-0.655927	0.131666	-4.98175	6.30124e-07	6.98634e-06	Down Regulated in Acute
ENSG00000151503.12	NCAPD3	protein_coding	648.551	0.976901	0.196106	4.9815	6.30947e-07	6.99091e-06	Up Regulated in Acute
ENSG00000076554.15	TPD52	protein_coding	624.769	1.72076	0.345582	4.9793	6.38138e-07	7.0614e-06	Up Regulated in Acute
ENSG00000143507.17	DUSP10	protein_coding	246.909	-1.35196	0.271512	-4.97936	6.37935e-07	7.0614e-06	Down Regulated in Acute
ENSG00000134291.11	TMEM106C	protein_coding	765.592	1.52319	0.305925	4.97896	6.39267e-07	7.0693e-06	Up Regulated in Acute
ENSG00000205208.4	C4orf46	protein_coding	151.474	1.10784	0.222645	4.9758	6.4978e-07	7.18089e-06	Up Regulated in Acute
ENSG00000058668.14	ATP2B4	protein_coding	2162.06	-0.839513	0.168791	-4.97368	6.56946e-07	7.25115e-06	Down Regulated in Acute
ENSG00000265808.3	SEC22B	protein_coding	1295.25	0.715144	0.143786	4.97366	6.57e-07	7.25115e-06	Up Regulated in Acute
ENSG00000183688.4	FAM101B	protein_coding	1104.03	-1.14232	0.229762	-4.97175	6.63518e-07	7.31846e-06	Down Regulated in Acute
ENSG00000084652.15	TXLNA	protein_coding	1277.96	0.676384	0.136095	4.96995	6.69691e-07	7.38177e-06	Up Regulated in Acute
ENSG00000133112.16	TPT1	protein_coding	82193.7	-1.05137	0.211554	-4.96973	6.70455e-07	7.38541e-06	Down Regulated in Acute
ENSG00000196873.15	CBWD3	protein_coding	177.368	0.915294	0.1842	4.96901	6.73e-07	7.40823e-06	Up Regulated in Acute
ENSG00000166439.5	RNF169	protein_coding	1285.39	-0.719059	0.144714	-4.96881	6.73638e-07	7.41088e-06	Down Regulated in Acute
ENSG00000164983.7	TMEM65	protein_coding	339.094	-0.892031	0.179535	-4.96856	6.74509e-07	7.41568e-06	Down Regulated in Acute
ENSG00000237172.3	B3GNT9	protein_coding	58.6048	1.47191	0.296311	4.96746	6.78343e-07	7.453e-06	Up Regulated in Acute
ENSG00000105726.16	ATP13A1	protein_coding	1884.22	0.835658	0.168252	4.96672	6.81e-07	7.477e-06	Up Regulated in Acute
ENSG00000146733.13	PSPH	protein_coding	108.117	1.49102	0.300247	4.96596	6.83624e-07	7.49837e-06	Up Regulated in Acute
ENSG00000186529.14	CYP4F3	protein_coding	16.2766	-3.20024	0.644441	-4.96591	6.83791e-07	7.49837e-06	Down Regulated in Acute
ENSG00000157637.12	SLC38A10	protein_coding	1448.57	0.65611	0.132207	4.96274	6.95053e-07	7.61206e-06	Up Regulated in Acute
ENSG00000167703.14	SLC43A2	protein_coding	1381.79	-1.11394	0.22446	-4.96275	6.95e-07	7.61206e-06	Down Regulated in Acute
ENSG00000075239.13	ACAT1	protein_coding	732.549	1.16059	0.233948	4.96088	7.01757e-07	7.67325e-06	Up Regulated in Acute
ENSG00000081870.11	HSPB11	protein_coding	644.402	0.809219	0.16312	4.96087	7.01785e-07	7.67325e-06	Up Regulated in Acute
ENSG00000137266.14	SLC22A23	protein_coding	58.9181	-1.69379	0.341434	-4.96081	7.02e-07	7.67325e-06	Down Regulated in Acute
ENSG00000184154.12	LRTOMT	protein_coding	43.1884	1.50558	0.303522	4.96035	7.03651e-07	7.68645e-06	Up Regulated in Acute
ENSG00000127507.17	ADGRE2	protein_coding	2038.6	-1.24171	0.250362	-4.95967	7.06128e-07	7.70857e-06	Down Regulated in Acute
ENSG00000140259.6	MFAP1	protein_coding	427.453	1.13266	0.22852	4.95653	7.17645e-07	7.82927e-06	Up Regulated in Acute
ENSG00000160111.12	CPAMD8	protein_coding	113.773	-1.4949	0.301678	-4.95529	7.22242e-07	7.87438e-06	Down Regulated in Acute
ENSG00000162591.15	MEGF6	protein_coding	124.316	-1.89351	0.382184	-4.95444	7.25375e-07	7.90348e-06	Down Regulated in Acute
ENSG00000102794.9	IRG1	protein_coding	11.0984	3.54477	0.715541	4.95397	7.2713e-07	7.91754e-06	Up Regulated in Acute
ENSG00000009844.15	VTA1	protein_coding	722.432	0.76718	0.155009	4.94924	7.45e-07	8.10725e-06	Up Regulated in Acute
ENSG00000167083.6	GNGT2	protein_coding	318.072	0.653307	0.132039	4.94784	7.50434e-07	8.15564e-06	Up Regulated in Acute
ENSG00000181045.14	SLC26A11	protein_coding	307.122	-1.02796	0.207755	-4.94795	7.5e-07	8.15564e-06	Down Regulated in Acute
ENSG00000170571.11	EMB	protein_coding	2480.35	-0.691397	0.139793	-4.94585	7.58105e-07	8.23376e-06	Down Regulated in Acute
ENSG00000140848.16	CPNE2	protein_coding	393.963	-0.952244	0.192568	-4.94497	7.6156e-07	8.266e-06	Down Regulated in Acute
ENSG00000072736.18	NFATC3	protein_coding	1381.51	-0.498862	0.100947	-4.94181	7.74e-07	8.39566e-06	Down Regulated in Acute
ENSG00000109046.14	WSB1	protein_coding	5497.85	1.08816	0.220284	4.9398	7.82e-07	8.47742e-06	Up Regulated in Acute
ENSG00000198467.13	TPM2	protein_coding	587.843	-1.57509	0.318895	-4.93922	7.84364e-07	8.49728e-06	Down Regulated in Acute
ENSG00000130024.14	PHF10	protein_coding	1323.87	-0.595045	0.120514	-4.93757	7.91e-07	8.56409e-06	Down Regulated in Acute
ENSG00000186283.13	TOR3A	protein_coding	1776.41	0.96193	0.194914	4.93514	8.00923e-07	8.66564e-06	Up Regulated in Acute
ENSG00000168890.13	TMEM150A	protein_coding	243.294	-0.978131	0.198246	-4.93394	8.05888e-07	8.71382e-06	Down Regulated in Acute
ENSG00000165283.15	STOML2	protein_coding	1276.43	0.913752	0.185222	4.93327	8.08659e-07	8.73823e-06	Up Regulated in Acute
ENSG00000014138.8	POLA2	protein_coding	516.69	0.892778	0.181074	4.93045	8.20409e-07	8.85959e-06	Up Regulated in Acute
ENSG00000196139.11	AKR1C3	protein_coding	85.2078	-1.64025	0.332709	-4.93	8.22309e-07	8.87447e-06	Down Regulated in Acute
ENSG00000118816.9	CCNI	protein_coding	5582.28	-0.814899	0.165489	-4.92419	8.47119e-07	9.13643e-06	Down Regulated in Acute
ENSG00000079215.13	SLC1A3	protein_coding	69.0873	1.92964	0.391959	4.92308	8.51943e-07	9.18265e-06	Up Regulated in Acute
ENSG00000120594.16	PLXDC2	protein_coding	1468.44	-0.782312	0.158916	-4.92279	8.53211e-07	9.1905e-06	Down Regulated in Acute
ENSG00000139187.9	KLRG1	protein_coding	371.67	-1.24068	0.252092	-4.92156	8.58589e-07	9.24259e-06	Down Regulated in Acute
ENSG00000186049.8	KRT73	protein_coding	122.388	-1.83297	0.372454	-4.92134	8.59551e-07	9.2471e-06	Down Regulated in Acute
ENSG00000140932.9	CMTM2	protein_coding	45.4391	-2.13467	0.433883	-4.91992	8.65815e-07	9.3086e-06	Down Regulated in Acute
ENSG00000196428.12	TSC22D2	protein_coding	293.185	-0.73674	0.149762	-4.9194	8.68096e-07	9.32724e-06	Down Regulated in Acute
ENSG00000237651.6	C2orf74	protein_coding	16.0323	1.93116	0.392724	4.91733	8.77312e-07	9.42032e-06	Up Regulated in Acute
ENSG00000144455.13	SUMF1	protein_coding	580.679	-1.13199	0.230279	-4.91574	8.84491e-07	9.49141e-06	Down Regulated in Acute
ENSG00000189057.10	FAM111B	protein_coding	227.315	2.38683	0.48571	4.91411	8.91881e-07	9.56469e-06	Up Regulated in Acute
ENSG00000135362.13	PRR5L	protein_coding	488.564	-1.0175	0.207067	-4.91384	8.93081e-07	9.57154e-06	Down Regulated in Acute
ENSG00000151208.16	DLG5	protein_coding	127.295	-1.66347	0.338801	-4.90988	9.11315e-07	9.76082e-06	Down Regulated in Acute
ENSG00000100122.5	CRYBB1	protein_coding	14.3052	2.51305	0.511856	4.90968	9.12238e-07	9.76456e-06	Up Regulated in Acute
ENSG00000172260.13	NEGR1	protein_coding	26.6027	-2.35376	0.47953	-4.90847	9.1788e-07	9.81878e-06	Down Regulated in Acute
ENSG00000101842.13	VSIG1	protein_coding	97.2439	-1.41439	0.288175	-4.90808	9.19729e-07	9.82621e-06	Down Regulated in Acute
ENSG00000132341.11	RAN	protein_coding	4945.2	0.958296	0.195248	4.90811	9.19601e-07	9.82621e-06	Up Regulated in Acute
ENSG00000106144.19	CASP2	protein_coding	1243.65	-0.602719	0.122875	-4.90513	9.33678e-07	9.96565e-06	Down Regulated in Acute
ENSG00000196843.15	ARID5A	protein_coding	794.564	-0.943749	0.192403	-4.90507	9.34e-07	9.96565e-06	Down Regulated in Acute
ENSG00000130733.10	YIPF2	protein_coding	221.686	0.787745	0.160709	4.90168	9.50192e-07	1.01326e-05	Up Regulated in Acute
ENSG00000006740.16	ARHGAP44	protein_coding	17.6073	3.25715	0.664525	4.90147	9.51242e-07	1.01375e-05	Up Regulated in Acute
ENSG00000065717.14	TLE2	protein_coding	59.6686	-1.35777	0.277091	-4.90007	9.58e-07	1.02031e-05	Down Regulated in Acute
ENSG00000154764.5	WNT7A	protein_coding	32.8922	-2.20145	0.449522	-4.89732	9.71522e-07	1.03406e-05	Down Regulated in Acute
ENSG00000121964.14	GTDC1	protein_coding	284.572	-0.589821	0.120442	-4.89715	9.72344e-07	1.03429e-05	Down Regulated in Acute
ENSG00000173409.13	ARV1	protein_coding	287.77	1.01575	0.207441	4.89655	9.75316e-07	1.03681e-05	Up Regulated in Acute
ENSG00000154832.14	CXXC1	protein_coding	1418.87	0.645711	0.131911	4.89505	9.82825e-07	1.04414e-05	Up Regulated in Acute
ENSG00000147010.17	SH3KBP1	protein_coding	2579.45	-0.403968	0.0825433	-4.89402	9.88e-07	1.04894e-05	Down Regulated in Acute
ENSG00000138821.12	SLC39A8	protein_coding	381.746	0.953342	0.194903	4.89137	1.00138e-06	1.06252e-05	Up Regulated in Acute
ENSG00000087995.15	METTL2A	protein_coding	184.093	1.21201	0.247819	4.89072	1.00467e-06	1.06535e-05	Up Regulated in Acute
ENSG00000103356.15	EARS2	protein_coding	287.352	1.16126	0.237533	4.88885	1.01429e-06	1.07488e-05	Up Regulated in Acute
ENSG00000179091.4	CYC1	protein_coding	1239.16	0.789553	0.161517	4.88835	1.01684e-06	1.07691e-05	Up Regulated in Acute
ENSG00000166272.16	WBP1L	protein_coding	1524.25	-0.658662	0.134749	-4.88808	1.01823e-06	1.07772e-05	Down Regulated in Acute
ENSG00000149187.17	CELF1	protein_coding	3996.24	-0.7819	0.159969	-4.88784	1.0195e-06	1.07839e-05	Down Regulated in Acute
ENSG00000051596.9	THOC3	protein_coding	155.679	0.835285	0.170918	4.88704	1.02363e-06	1.08209e-05	Up Regulated in Acute
ENSG00000135077.8	HAVCR2	protein_coding	992.64	0.79257	0.162191	4.88663	1.02575e-06	1.08365e-05	Up Regulated in Acute
ENSG00000159023.18	EPB41	protein_coding	3005.23	-0.492262	0.100745	-4.8862	1.028e-06	1.08539e-05	Down Regulated in Acute
ENSG00000185164.14	NOMO2	protein_coding	420.883	1.78363	0.365102	4.88529	1.03275e-06	1.0897e-05	Up Regulated in Acute
ENSG00000101605.12	MYOM1	protein_coding	90.9529	-1.0019	0.205171	-4.88326	1.04346e-06	1.10032e-05	Down Regulated in Acute
ENSG00000239521.7	GATS	protein_coding	155.831	-0.94353	0.19325	-4.88243	1.04787e-06	1.10428e-05	Down Regulated in Acute
ENSG00000136840.18	ST6GALNAC4	protein_coding	386.812	1.27375	0.260961	4.88099	1.05555e-06	1.11169e-05	Up Regulated in Acute
ENSG00000186638.15	KIF24	protein_coding	47.9541	2.5476	0.521981	4.88064	1.0574e-06	1.11295e-05	Up Regulated in Acute
ENSG00000197183.12	NOL4L	protein_coding	939.984	-1.18682	0.243213	-4.87974	1.06226e-06	1.11737e-05	Down Regulated in Acute
ENSG00000277836.1	AC141272.1	protein_coding	20.7892	4.29702	0.881245	4.87608	1.08216e-06	1.13761e-05	Up Regulated in Acute
ENSG00000188522.14	FAM83G	protein_coding	111.311	1.82498	0.374351	4.87504	1.08785e-06	1.14288e-05	Up Regulated in Acute
ENSG00000170892.10	TSEN34	protein_coding	405.986	-0.820186	0.168267	-4.87432	1.09184e-06	1.14636e-05	Down Regulated in Acute
ENSG00000119912.15	IDE	protein_coding	722.282	0.930455	0.190939	4.87305	1.09888e-06	1.15305e-05	Up Regulated in Acute
ENSG00000119013.8	NDUFB3	protein_coding	1204.93	1.18449	0.243102	4.87241	1.10244e-06	1.15536e-05	Up Regulated in Acute
ENSG00000198431.15	TXNRD1	protein_coding	1025.28	0.879277	0.180457	4.8725	1.102e-06	1.15536e-05	Up Regulated in Acute
ENSG00000242247.10	ARFGAP3	protein_coding	1097.02	0.887405	0.182152	4.87177	1.106e-06	1.15838e-05	Up Regulated in Acute
ENSG00000077943.7	ITGA8	protein_coding	12.5586	4.63352	0.95159	4.86924	1.1203e-06	1.17253e-05	Up Regulated in Acute
ENSG00000163788.13	SNRK	protein_coding	1472.37	-0.793183	0.1629	-4.86913	1.12089e-06	1.17253e-05	Down Regulated in Acute
ENSG00000117395.10	EBNA1BP2	protein_coding	775.258	1.01575	0.208819	4.86426	1.14883e-06	1.20102e-05	Up Regulated in Acute
ENSG00000148411.7	NACC2	protein_coding	864.698	-0.982556	0.202042	-4.86312	1.1555e-06	1.20709e-05	Down Regulated in Acute
ENSG00000151092.16	NGLY1	protein_coding	1550.37	0.834254	0.17155	4.86302	1.15606e-06	1.20709e-05	Up Regulated in Acute
ENSG00000112394.16	SLC16A10	protein_coding	49.7983	-1.81806	0.374093	-4.85991	1.17439e-06	1.22548e-05	Down Regulated in Acute
ENSG00000140564.10	FURIN	protein_coding	1699.91	-0.890042	0.183174	-4.859	1.17977e-06	1.23035e-05	Down Regulated in Acute
ENSG00000173559.12	NABP1	protein_coding	1783.61	0.777313	0.160032	4.85724	1.19034e-06	1.2406e-05	Up Regulated in Acute
ENSG00000103187.7	COTL1	protein_coding	16350.3	-0.756227	0.15572	-4.85632	1.1959e-06	1.24563e-05	Down Regulated in Acute
ENSG00000152672.7	CLEC4F	protein_coding	126.178	-3.70753	0.763482	-4.85608	1.19735e-06	1.24639e-05	Down Regulated in Acute
ENSG00000206535.7	LNP1	protein_coding	25.0849	2.13852	0.440445	4.85537	1.20162e-06	1.25006e-05	Up Regulated in Acute
ENSG00000105993.14	DNAJB6	protein_coding	1631.36	-0.572697	0.117986	-4.85396	1.21022e-06	1.25671e-05	Down Regulated in Acute
ENSG00000146021.14	KLHL3	protein_coding	213.284	-1.32869	0.273727	-4.85406	1.2096e-06	1.25671e-05	Down Regulated in Acute
ENSG00000161513.11	FDXR	protein_coding	168.019	1.16383	0.23976	4.85416	1.209e-06	1.25671e-05	Up Regulated in Acute
ENSG00000164253.12	WDR41	protein_coding	609.107	0.799754	0.164841	4.85167	1.22425e-06	1.27051e-05	Up Regulated in Acute
ENSG00000177169.9	ULK1	protein_coding	711.715	-0.779895	0.160875	-4.84785	1.24808e-06	1.29445e-05	Down Regulated in Acute
ENSG00000005812.10	FBXL3	protein_coding	797.34	-0.575721	0.118801	-4.8461	1.25911e-06	1.30509e-05	Down Regulated in Acute
ENSG00000136854.17	STXBP1	protein_coding	18.9018	-2.13629	0.441135	-4.8427	1.28087e-06	1.32684e-05	Down Regulated in Acute
ENSG00000100599.15	RIN3	protein_coding	2179.17	-1.18816	0.245501	-4.83973	1.30013e-06	1.34597e-05	Down Regulated in Acute
ENSG00000183696.13	UPP1	protein_coding	1777.8	-0.686923	0.141962	-4.83879	1.30633e-06	1.35156e-05	Down Regulated in Acute
ENSG00000124466.8	LYPD3	protein_coding	18.843	-2.65558	0.548833	-4.83859	1.30765e-06	1.35211e-05	Down Regulated in Acute
ENSG00000181523.12	SGSH	protein_coding	921.785	-1.00965	0.208717	-4.83739	1.31558e-06	1.35948e-05	Down Regulated in Acute
ENSG00000144821.9	MYH15	protein_coding	22.1908	2.62655	0.543177	4.83553	1.32789e-06	1.37138e-05	Up Regulated in Acute
ENSG00000156675.15	RAB11FIP1	protein_coding	1800.02	-0.792225	0.163902	-4.83353	1.3413e-06	1.38438e-05	Down Regulated in Acute
ENSG00000155189.11	AGPAT5	protein_coding	315.963	0.886655	0.183563	4.83024	1.36369e-06	1.40664e-05	Up Regulated in Acute
ENSG00000139193.3	CD27	protein_coding	2146.94	1.56818	0.324779	4.82845	1.376e-06	1.41844e-05	Up Regulated in Acute
ENSG00000204516.9	MICB	protein_coding	698.905	0.837774	0.173572	4.82665	1.38847e-06	1.43047e-05	Up Regulated in Acute
ENSG00000163564.14	PYHIN1	protein_coding	617.837	-0.833048	0.172658	-4.82484	1.40112e-06	1.44263e-05	Down Regulated in Acute
ENSG00000111728.10	ST8SIA1	protein_coding	58.9263	-1.7788	0.368805	-4.82313	1.41321e-06	1.4535e-05	Down Regulated in Acute
ENSG00000183735.9	TBK1	protein_coding	790.789	0.743955	0.154248	4.82311	1.41339e-06	1.4535e-05	Up Regulated in Acute
ENSG00000108984.13	MAP2K6	protein_coding	331.201	0.738258	0.153072	4.82294	1.41459e-06	1.45386e-05	Up Regulated in Acute
ENSG00000151465.13	CDC123	protein_coding	1109.35	0.704739	0.14615	4.82203	1.421e-06	1.45934e-05	Up Regulated in Acute
ENSG00000163001.11	CFAP36	protein_coding	356.906	-0.858582	0.178057	-4.82195	1.42164e-06	1.45934e-05	Down Regulated in Acute
ENSG00000113460.12	BRIX1	protein_coding	488.487	0.622064	0.129036	4.82084	1.42954e-06	1.46657e-05	Up Regulated in Acute
ENSG00000165071.14	TMEM71	protein_coding	1289.34	-0.792815	0.164502	-4.81948	1.43931e-06	1.47571e-05	Down Regulated in Acute
ENSG00000102471.13	NDFIP2	protein_coding	43.1452	1.92567	0.399603	4.81895	1.44317e-06	1.47878e-05	Up Regulated in Acute
ENSG00000164885.12	CDK5	protein_coding	296.648	0.947304	0.196593	4.81861	1.44562e-06	1.48039e-05	Up Regulated in Acute
ENSG00000036565.14	SLC18A1	protein_coding	17.1237	-3.17411	0.659054	-4.81616	1.46348e-06	1.49778e-05	Down Regulated in Acute
ENSG00000197646.7	PDCD1LG2	protein_coding	29.895	2.38399	0.495163	4.81456	1.47528e-06	1.50895e-05	Up Regulated in Acute
ENSG00000114982.17	KANSL3	protein_coding	1615.92	-0.471314	0.0979133	-4.81359	1.48246e-06	1.51538e-05	Down Regulated in Acute
ENSG00000196628.13	TCF4	protein_coding	772.37	0.676539	0.140597	4.81189	1.4951e-06	1.52738e-05	Up Regulated in Acute
ENSG00000119777.18	TMEM214	protein_coding	1752.95	0.856038	0.177981	4.80971	1.51148e-06	1.5432e-05	Up Regulated in Acute
ENSG00000186017.14	ZNF566	protein_coding	95.3013	-0.977963	0.203358	-4.80908	1.51629e-06	1.54718e-05	Down Regulated in Acute
ENSG00000111752.10	PHC1	protein_coding	504.372	-1.00762	0.20955	-4.80848	1.52085e-06	1.5509e-05	Down Regulated in Acute
ENSG00000099341.11	PSMD8	protein_coding	2435.91	0.709796	0.147627	4.80803	1.52428e-06	1.55347e-05	Up Regulated in Acute
ENSG00000137434.11	C6orf52	protein_coding	14.6991	2.36281	0.491502	4.80732	1.52969e-06	1.55805e-05	Up Regulated in Acute
ENSG00000157734.13	SNX22	protein_coding	222.585	-1.49774	0.311615	-4.80637	1.537e-06	1.56452e-05	Down Regulated in Acute
ENSG00000119922.8	IFIT2	protein_coding	2303.51	2.34026	0.486996	4.8055	1.54365e-06	1.57039e-05	Up Regulated in Acute
ENSG00000272391.5	POM121C	protein_coding	880.429	-0.642842	0.133784	-4.80509	1.54683e-06	1.57269e-05	Down Regulated in Acute
ENSG00000135597.18	REPS1	protein_coding	899.451	-0.543814	0.113212	-4.8035	1.55915e-06	1.58427e-05	Down Regulated in Acute
ENSG00000109323.8	MANBA	protein_coding	1847.5	-0.688589	0.143393	-4.80212	1.57e-06	1.59334e-05	Down Regulated in Acute
ENSG00000127663.14	KDM4B	protein_coding	575.879	-0.892063	0.18576	-4.80223	1.569e-06	1.59334e-05	Down Regulated in Acute
ENSG00000013619.13	MAMLD1	protein_coding	24.0267	-1.89813	0.395402	-4.80051	1.58263e-06	1.60526e-05	Down Regulated in Acute
ENSG00000132300.18	PTCD3	protein_coding	1784.26	0.517042	0.107764	4.7979	1.60337e-06	1.62532e-05	Up Regulated in Acute
ENSG00000132823.10	OSER1	protein_coding	1266.22	-0.863942	0.180111	-4.79672	1.61285e-06	1.63396e-05	Down Regulated in Acute
ENSG00000070731.9	ST6GALNAC2	protein_coding	126.83	-1.81443	0.3783	-4.79628	1.61643e-06	1.63661e-05	Down Regulated in Acute
ENSG00000179222.17	MAGED1	protein_coding	1034.05	1.2211	0.254682	4.7946	1.63e-06	1.64939e-05	Up Regulated in Acute
ENSG00000151893.14	CACUL1	protein_coding	1092.39	-0.708906	0.147894	-4.79333	1.64038e-06	1.65709e-05	Down Regulated in Acute
ENSG00000156482.10	RPL30	protein_coding	33697.9	-1.08878	0.227135	-4.79351	1.63889e-06	1.65709e-05	Down Regulated in Acute
ENSG00000198909.7	MAP3K3	protein_coding	2251.09	-0.794421	0.165735	-4.79331	1.64055e-06	1.65709e-05	Down Regulated in Acute
ENSG00000197451.10	HNRNPAB	protein_coding	1699.13	0.84181	0.175785	4.78885	1.67741e-06	1.69332e-05	Up Regulated in Acute
ENSG00000138442.9	WDR12	protein_coding	374.583	0.824145	0.172142	4.78759	1.68793e-06	1.70293e-05	Up Regulated in Acute
ENSG00000170606.13	HSPA4	protein_coding	2103.13	0.719449	0.150325	4.78596	1.70168e-06	1.71578e-05	Up Regulated in Acute
ENSG00000092201.9	SUPT16H	protein_coding	2080.15	0.582732	0.121827	4.78329	1.72451e-06	1.73778e-05	Up Regulated in Acute
ENSG00000168310.10	IRF2	protein_coding	1524.38	1.06945	0.22362	4.78247	1.73153e-06	1.74382e-05	Up Regulated in Acute
ENSG00000135636.13	DYSF	protein_coding	1914.9	1.12192	0.234604	4.78217	1.73414e-06	1.74541e-05	Up Regulated in Acute
ENSG00000059804.15	SLC2A3	protein_coding	4130.63	-1.14797	0.240088	-4.78147	1.74016e-06	1.75044e-05	Down Regulated in Acute
ENSG00000124275.14	MTRR	protein_coding	928.609	0.811134	0.169658	4.781	1.74426e-06	1.75352e-05	Up Regulated in Acute
ENSG00000182578.13	CSF1R	protein_coding	5615.09	-1.09685	0.229431	-4.78074	1.74654e-06	1.75478e-05	Down Regulated in Acute
ENSG00000162813.17	BPNT1	protein_coding	324.814	0.924935	0.193512	4.77974	1.75519e-06	1.76243e-05	Up Regulated in Acute
ENSG00000177425.10	PAWR	protein_coding	96.2906	1.48414	0.310655	4.77745	1.77532e-06	1.7816e-05	Up Regulated in Acute
ENSG00000121310.16	ECHDC2	protein_coding	903.749	-0.977394	0.204642	-4.77613	1.787e-06	1.7923e-05	Down Regulated in Acute
ENSG00000138119.16	MYOF	protein_coding	1311.14	1.28087	0.268198	4.77585	1.7895e-06	1.79371e-05	Up Regulated in Acute
ENSG00000116983.12	HPCAL4	protein_coding	103.413	-0.94715	0.198387	-4.77426	1.80366e-06	1.80684e-05	Down Regulated in Acute
ENSG00000149527.17	PLCH2	protein_coding	130.156	-1.27211	0.266531	-4.77284	1.81647e-06	1.8186e-05	Down Regulated in Acute
ENSG00000122085.16	MTERF4	protein_coding	977.331	-0.487128	0.102104	-4.77092	1.8339e-06	1.83498e-05	Down Regulated in Acute
ENSG00000118705.16	RPN2	protein_coding	8249.93	1.17069	0.245453	4.76949	1.84695e-06	1.84695e-05	Up Regulated in Acute
ENSG00000107485.15	GATA3	protein_coding	810.833	-1.76411	0.369972	-4.76822	1.85863e-06	1.85754e-05	Down Regulated in Acute
ENSG00000111641.10	NOP2	protein_coding	1166.01	0.684799	0.143632	4.76772	1.86318e-06	1.86035e-05	Up Regulated in Acute
ENSG00000215784.5	FAM72D	protein_coding	24.0142	2.49099	0.522475	4.76768	1.86363e-06	1.86035e-05	Up Regulated in Acute
ENSG00000196735.11	HLA-DQA1	protein_coding	2485.71	-0.806557	0.169258	-4.76524	1.88625e-06	1.88183e-05	Down Regulated in Acute
ENSG00000196586.13	MYO6	protein_coding	113.513	-1.622	0.340461	-4.76412	1.89683e-06	1.89128e-05	Down Regulated in Acute
ENSG00000134539.16	KLRD1	protein_coding	1593.98	-1.25705	0.263909	-4.76321	1.90539e-06	1.8987e-05	Down Regulated in Acute
ENSG00000173548.8	SNX33	protein_coding	158.356	-0.962516	0.20208	-4.76304	1.907e-06	1.89919e-05	Down Regulated in Acute
ENSG00000156508.17	EEF1A1	protein_coding	186092	-0.806412	0.169328	-4.76242	1.91288e-06	1.90282e-05	Down Regulated in Acute
ENSG00000170525.18	PFKFB3	protein_coding	1690.07	-1.6833	0.353453	-4.76243	1.91271e-06	1.90282e-05	Down Regulated in Acute
ENSG00000164587.11	RPS14	protein_coding	24218.4	-0.967414	0.203151	-4.76205	1.91639e-06	1.90521e-05	Down Regulated in Acute
ENSG00000110888.17	CAPRIN2	protein_coding	792.53	-0.818837	0.171999	-4.7607	1.92921e-06	1.91683e-05	Down Regulated in Acute
ENSG00000130487.5	KLHDC7B	protein_coding	286.63	1.48596	0.312149	4.76043	1.93181e-06	1.9183e-05	Up Regulated in Acute
ENSG00000112304.10	ACOT13	protein_coding	324.741	1.09196	0.229438	4.75927	1.943e-06	1.92826e-05	Up Regulated in Acute
ENSG00000188603.16	CLN3	protein_coding	285.116	-0.830782	0.174631	-4.75735	1.96156e-06	1.94556e-05	Down Regulated in Acute
ENSG00000182718.16	ANXA2	protein_coding	14325.3	0.627174	0.131861	4.75634	1.97136e-06	1.95414e-05	Up Regulated in Acute
ENSG00000162144.9	CYB561A3	protein_coding	1433.11	-0.611562	0.128629	-4.75447	1.9897e-06	1.97118e-05	Down Regulated in Acute
ENSG00000183826.16	BTBD9	protein_coding	265.207	-0.925694	0.194728	-4.75378	1.99643e-06	1.9767e-05	Down Regulated in Acute
ENSG00000160190.13	SLC37A1	protein_coding	535.809	1.11164	0.233883	4.75299	2.00434e-06	1.98337e-05	Up Regulated in Acute
ENSG00000180357.9	ZNF609	protein_coding	880.281	-1.00019	0.210529	-4.75083	2.02582e-06	2.00231e-05	Down Regulated in Acute
ENSG00000189319.13	FAM53B	protein_coding	1113.12	-0.81517	0.171584	-4.75085	2.02564e-06	2.00231e-05	Down Regulated in Acute
ENSG00000091409.14	ITGA6	protein_coding	936.031	-0.820663	0.172821	-4.74864	2.04786e-06	2.02175e-05	Down Regulated in Acute
ENSG00000130304.16	SLC27A1	protein_coding	314.272	-1.07659	0.226712	-4.7487	2.04731e-06	2.02175e-05	Down Regulated in Acute
ENSG00000125703.14	ATG4C	protein_coding	314.601	0.829459	0.174683	4.74837	2.05059e-06	2.0221e-05	Up Regulated in Acute
ENSG00000145425.9	RPS3A	protein_coding	50981	-1.34641	0.283552	-4.74838	2.05054e-06	2.0221e-05	Down Regulated in Acute
ENSG00000155906.16	RMND1	protein_coding	268.704	0.712344	0.150028	4.74808	2.05359e-06	2.0227e-05	Up Regulated in Acute
ENSG00000205476.8	CCDC85C	protein_coding	62.8951	-1.63868	0.345124	-4.74809	2.05344e-06	2.0227e-05	Down Regulated in Acute
ENSG00000112237.12	CCNC	protein_coding	1074.86	1.06327	0.223949	4.74783	2.05609e-06	2.024e-05	Up Regulated in Acute
ENSG00000177685.16	CRACR2B	protein_coding	64.1906	1.18309	0.24922	4.74718	2.06273e-06	2.02936e-05	Up Regulated in Acute
ENSG00000091483.6	FH	protein_coding	1055.84	1.02742	0.21644	4.74689	2.06573e-06	2.03114e-05	Up Regulated in Acute
ENSG00000152942.18	RAD17	protein_coding	778.69	0.775905	0.163504	4.74548	2.08008e-06	2.04289e-05	Up Regulated in Acute
ENSG00000177045.7	SIX5	protein_coding	17.7034	2.30327	0.48535	4.74559	2.079e-06	2.04289e-05	Up Regulated in Acute
ENSG00000205189.11	ZBTB10	protein_coding	136.229	-1.45466	0.306703	-4.74288	2.107e-06	2.06814e-05	Down Regulated in Acute
ENSG00000198270.12	TMEM116	protein_coding	308.065	-0.678911	0.14328	-4.73836	2.1545e-06	2.11354e-05	Down Regulated in Acute
ENSG00000221968.8	FADS3	protein_coding	168.997	-1.0324	0.217911	-4.73771	2.16143e-06	2.11912e-05	Down Regulated in Acute
ENSG00000070444.14	MNT	protein_coding	545.166	-0.978027	0.206459	-4.73716	2.16733e-06	2.12368e-05	Down Regulated in Acute
ENSG00000104936.17	DMPK	protein_coding	129.975	-1.03125	0.217736	-4.73624	2.17725e-06	2.13217e-05	Down Regulated in Acute
ENSG00000204977.9	TRIM13	protein_coding	525.411	-0.646222	0.136459	-4.73564	2.18365e-06	2.13722e-05	Down Regulated in Acute
ENSG00000181982.17	CCDC149	protein_coding	294.102	-1.1957	0.252576	-4.73402	2.20116e-06	2.15312e-05	Down Regulated in Acute
ENSG00000169223.14	LMAN2	protein_coding	2596.47	1.01845	0.215143	4.7338	2.20356e-06	2.15422e-05	Up Regulated in Acute
ENSG00000109501.13	WFS1	protein_coding	108.276	1.95405	0.41289	4.73261	2.21648e-06	2.16561e-05	Up Regulated in Acute
ENSG00000167996.15	FTH1	protein_coding	46927.5	-1.10177	0.232869	-4.73128	2.23108e-06	2.17863e-05	Down Regulated in Acute
ENSG00000112812.15	PRSS16	protein_coding	22.2379	2.02717	0.428519	4.73065	2.23806e-06	2.18419e-05	Up Regulated in Acute
ENSG00000142892.14	PIGK	protein_coding	485.114	0.783439	0.165626	4.73016	2.24342e-06	2.18692e-05	Up Regulated in Acute
ENSG00000165092.12	ALDH1A1	protein_coding	614.002	-1.20703	0.25517	-4.73027	2.24217e-06	2.18692e-05	Down Regulated in Acute
ENSG00000204070.9	SYS1	protein_coding	560.834	-0.749914	0.158543	-4.73002	2.24493e-06	2.18714e-05	Down Regulated in Acute
ENSG00000198945.7	L3MBTL3	protein_coding	456.218	-0.901218	0.190545	-4.72969	2.24859e-06	2.18945e-05	Down Regulated in Acute
ENSG00000130522.5	JUND	protein_coding	2471.64	-1.38511	0.292935	-4.72838	2.2632e-06	2.20242e-05	Down Regulated in Acute
ENSG00000182934.11	SRPR	protein_coding	4876.41	0.857415	0.181382	4.72714	2.27709e-06	2.21467e-05	Up Regulated in Acute
ENSG00000086061.15	DNAJA1	protein_coding	2593.83	0.753621	0.159463	4.72599	2.28995e-06	2.2259e-05	Up Regulated in Acute
ENSG00000101557.14	USP14	protein_coding	974.735	0.681908	0.144335	4.72449	2.307e-06	2.24118e-05	Up Regulated in Acute
ENSG00000116731.22	PRDM2	protein_coding	1545.08	-0.648462	0.137266	-4.72412	2.31115e-06	2.24395e-05	Down Regulated in Acute
ENSG00000142634.12	EFHD2	protein_coding	3730.67	-0.602966	0.127647	-4.72368	2.31615e-06	2.24752e-05	Down Regulated in Acute
ENSG00000121297.6	TSHZ3	protein_coding	176.473	-1.27241	0.269464	-4.722	2.33539e-06	2.2649e-05	Down Regulated in Acute
ENSG00000006062.13	MAP3K14	protein_coding	907.497	-0.788887	0.167108	-4.7208	2.34913e-06	2.27693e-05	Down Regulated in Acute
ENSG00000179820.15	MYADM	protein_coding	1731.22	-0.754269	0.15978	-4.72067	2.35067e-06	2.27713e-05	Down Regulated in Acute
ENSG00000198176.12	TFDP1	protein_coding	1186.73	0.553895	0.117383	4.7187	2.37355e-06	2.29799e-05	Up Regulated in Acute
ENSG00000140688.16	C16orf58	protein_coding	1288.83	0.536072	0.113616	4.71829	2.37841e-06	2.30013e-05	Up Regulated in Acute
ENSG00000140948.11	ZCCHC14	protein_coding	211.525	-1.21107	0.256676	-4.71828	2.37846e-06	2.30013e-05	Down Regulated in Acute
ENSG00000168234.12	TTC39C	protein_coding	1060.88	-0.815016	0.172747	-4.71797	2.38212e-06	2.30236e-05	Down Regulated in Acute
ENSG00000138190.16	EXOC6	protein_coding	448.319	0.670953	0.142227	4.71749	2.38768e-06	2.30642e-05	Up Regulated in Acute
ENSG00000197540.7	GZMM	protein_coding	191.041	-1.34504	0.285226	-4.71568	2.40907e-06	2.32576e-05	Down Regulated in Acute
ENSG00000143951.15	WDPCP	protein_coding	114.039	-1.05818	0.224445	-4.71463	2.42149e-06	2.33643e-05	Down Regulated in Acute
ENSG00000116741.7	RGS2	protein_coding	4752.26	-1.56004	0.330954	-4.71377	2.4318e-06	2.34505e-05	Down Regulated in Acute
ENSG00000168040.4	FADD	protein_coding	294.966	0.812969	0.172519	4.71235	2.44877e-06	2.36008e-05	Up Regulated in Acute
ENSG00000164163.10	ABCE1	protein_coding	1018.32	0.732131	0.155395	4.71142	2.46e-06	2.36958e-05	Up Regulated in Acute
ENSG00000215910.7	C1orf167	protein_coding	9.78224	5.19801	1.10341	4.71088	2.46651e-06	2.37449e-05	Up Regulated in Acute
ENSG00000162747.9	FCGR3B	protein_coding	238.57	2.90457	0.616667	4.7101	2.47594e-06	2.38222e-05	Up Regulated in Acute
ENSG00000203747.9	FCGR3A	protein_coding	8138.36	-1.08812	0.231029	-4.70989	2.47845e-06	2.38328e-05	Down Regulated in Acute
ENSG00000136758.18	YME1L1	protein_coding	2485.35	0.754105	0.160164	4.70835	2.49736e-06	2.40011e-05	Up Regulated in Acute
ENSG00000173011.11	TADA2B	protein_coding	802.628	-0.541989	0.115122	-4.70796	2.50207e-06	2.40329e-05	Down Regulated in Acute
ENSG00000077684.15	JADE1	protein_coding	782.056	-0.688406	0.146304	-4.70532	2.53464e-06	2.43319e-05	Down Regulated in Acute
ENSG00000106244.12	PDAP1	protein_coding	1276.71	0.514136	0.109299	4.70395	2.55176e-06	2.44688e-05	Up Regulated in Acute
ENSG00000198682.12	PAPSS2	protein_coding	80.1116	-1.67783	0.356677	-4.70406	2.5504e-06	2.44688e-05	Down Regulated in Acute
ENSG00000168701.18	TMEM208	protein_coding	756.519	1.08204	0.23005	4.70351	2.55731e-06	2.45082e-05	Up Regulated in Acute
ENSG00000110203.8	FOLR3	protein_coding	774.516	-1.41478	0.300932	-4.70131	2.585e-06	2.47454e-05	Down Regulated in Acute
ENSG00000121486.11	TRMT1L	protein_coding	433.24	0.803655	0.17094	4.7014	2.58385e-06	2.47454e-05	Up Regulated in Acute
ENSG00000240563.1	L1TD1	protein_coding	44.4583	2.11611	0.450138	4.70103	2.58848e-06	2.4765e-05	Up Regulated in Acute
ENSG00000111254.7	AKAP3	protein_coding	20.7428	1.57241	0.334665	4.69847	2.62116e-06	2.50637e-05	Up Regulated in Acute
ENSG00000160593.17	AMICA1	protein_coding	12764.3	-1.02264	0.217707	-4.69733	2.63579e-06	2.51894e-05	Down Regulated in Acute
ENSG00000124785.8	NRN1	protein_coding	24.6975	2.64994	0.564308	4.69591	2.65428e-06	2.53426e-05	Up Regulated in Acute
ENSG00000154813.9	DPH3	protein_coding	400.665	0.76547	0.163009	4.69587	2.6548e-06	2.53426e-05	Up Regulated in Acute
ENSG00000145882.10	PCYOX1L	protein_coding	794.289	-0.743182	0.158275	-4.69551	2.65944e-06	2.53727e-05	Down Regulated in Acute
ENSG00000188917.14	TRMT2B	protein_coding	638.079	-0.777896	0.165683	-4.69508	2.665e-06	2.54114e-05	Down Regulated in Acute
ENSG00000125726.10	CD70	protein_coding	53.3563	1.54345	0.328808	4.69406	2.67834e-06	2.55244e-05	Up Regulated in Acute
ENSG00000136720.6	HS6ST1	protein_coding	254.306	-0.816876	0.174102	-4.69194	2.70627e-06	2.57762e-05	Down Regulated in Acute
ENSG00000159259.7	CHAF1B	protein_coding	131.855	1.6781	0.357712	4.69122	2.71582e-06	2.58527e-05	Up Regulated in Acute
ENSG00000157833.12	GAREML	protein_coding	41.4129	-1.62973	0.347514	-4.68968	2.73627e-06	2.60328e-05	Down Regulated in Acute
ENSG00000125384.6	PTGER2	protein_coding	710.219	-0.902647	0.192522	-4.68853	2.75179e-06	2.61658e-05	Down Regulated in Acute
ENSG00000205659.10	LIN52	protein_coding	218.577	1.29081	0.275348	4.6879	2.76019e-06	2.6231e-05	Up Regulated in Acute
ENSG00000129824.15	RPS4Y1	protein_coding	5127.3	-1.20564	0.257254	-4.68658	2.77815e-06	2.6387e-05	Down Regulated in Acute
ENSG00000148730.6	EIF4EBP2	protein_coding	3469.12	-0.4999	0.106669	-4.68645	2.77988e-06	2.63888e-05	Down Regulated in Acute
ENSG00000150401.14	DCUN1D2	protein_coding	300.594	-0.748649	0.159913	-4.6816	2.84638e-06	2.7005e-05	Down Regulated in Acute
ENSG00000134882.15	UBAC2	protein_coding	1040.27	-0.494846	0.105781	-4.67804	2.89629e-06	2.74326e-05	Down Regulated in Acute
ENSG00000160310.16	PRMT2	protein_coding	2120.39	-0.651489	0.139264	-4.6781	2.89551e-06	2.74326e-05	Down Regulated in Acute
ENSG00000171867.16	PRNP	protein_coding	1422.36	-0.559483	0.119595	-4.67816	2.89461e-06	2.74326e-05	Down Regulated in Acute
ENSG00000188404.8	SELL	protein_coding	16633.1	0.532452	0.113859	4.67642	2.91924e-06	2.76346e-05	Up Regulated in Acute
ENSG00000168491.9	CCDC110	protein_coding	10.1352	3.20534	0.685491	4.67597	2.92566e-06	2.768e-05	Up Regulated in Acute
ENSG00000204219.9	TCEA3	protein_coding	171.947	-1.35434	0.289651	-4.67578	2.9284e-06	2.76905e-05	Down Regulated in Acute
ENSG00000185101.12	ANO9	protein_coding	552.317	-0.985396	0.210803	-4.67448	2.947e-06	2.78507e-05	Down Regulated in Acute
ENSG00000120656.11	TAF12	protein_coding	662.026	0.771903	0.165158	4.67371	2.95807e-06	2.794e-05	Up Regulated in Acute
ENSG00000186919.12	ZACN	protein_coding	7.87406	3.43326	0.734702	4.67299	2.96843e-06	2.80224e-05	Up Regulated in Acute
ENSG00000142192.20	APP	protein_coding	1699.24	-0.824467	0.176486	-4.67158	2.98887e-06	2.81997e-05	Down Regulated in Acute
ENSG00000121940.15	CLCC1	protein_coding	501.101	0.837436	0.179367	4.66884	3.029e-06	2.85623e-05	Up Regulated in Acute
ENSG00000197558.11	SSPO	protein_coding	31.857	-1.84506	0.395242	-4.66818	3.03872e-06	2.86383e-05	Down Regulated in Acute
ENSG00000111674.8	ENO2	protein_coding	660.478	-1.08321	0.232078	-4.66742	3.05e-06	2.87032e-05	Down Regulated in Acute
ENSG00000138185.16	ENTPD1	protein_coding	2940.63	0.737619	0.158037	4.66738	3.05066e-06	2.87032e-05	Up Regulated in Acute
ENSG00000175265.17	GOLGA8A	protein_coding	1741.58	-0.68718	0.147227	-4.66747	3.04925e-06	2.87032e-05	Down Regulated in Acute
ENSG00000020577.13	SAMD4A	protein_coding	614.915	1.57493	0.337483	4.6667	3.06078e-06	2.87825e-05	Up Regulated in Acute
ENSG00000175592.8	FOSL1	protein_coding	27.4023	2.32649	0.498571	4.66632	3.06647e-06	2.88201e-05	Up Regulated in Acute
ENSG00000177311.10	ZBTB38	protein_coding	984.234	1.16823	0.250426	4.66495	3.08686e-06	2.89957e-05	Up Regulated in Acute
ENSG00000180773.14	SLC36A4	protein_coding	318.111	-0.604621	0.129759	-4.65956	3.16886e-06	2.97495e-05	Down Regulated in Acute
ENSG00000177954.11	RPS27	protein_coding	52089.8	-1.199	0.25742	-4.65776	3.19663e-06	2.99772e-05	Down Regulated in Acute
ENSG00000243811.7	APOBEC3D	protein_coding	482.493	0.980915	0.210596	4.65781	3.19593e-06	2.99772e-05	Up Regulated in Acute
ENSG00000108588.13	CCDC47	protein_coding	852.584	0.90935	0.195348	4.65502	3.23944e-06	3.03619e-05	Up Regulated in Acute
ENSG00000204287.13	HLA-DRA	protein_coding	38947.1	-0.71991	0.15466	-4.65478	3.24327e-06	3.03811e-05	Down Regulated in Acute
ENSG00000166979.12	EVA1C	protein_coding	140.116	-1.54452	0.331823	-4.65466	3.2452e-06	3.03825e-05	Down Regulated in Acute
ENSG00000130723.17	PRRC2B	protein_coding	2718.14	-0.768858	0.165185	-4.65454	3.247e-06	3.03828e-05	Down Regulated in Acute
ENSG00000105717.13	PBX4	protein_coding	115.78	-1.29955	0.279209	-4.65439	3.24943e-06	3.03887e-05	Down Regulated in Acute
ENSG00000165916.8	PSMC3	protein_coding	1542.5	0.79923	0.17173	4.65398	3.2559e-06	3.04324e-05	Up Regulated in Acute
ENSG00000198888.2	MT-ND1	protein_coding	114732	0.877952	0.188765	4.65103	3.30286e-06	3.08545e-05	Up Regulated in Acute
ENSG00000091592.15	NLRP1	protein_coding	8522.37	-0.898728	0.193468	-4.64535	3.39494e-06	3.16973e-05	Down Regulated in Acute
ENSG00000119314.15	PTBP3	protein_coding	2319.31	-0.413649	0.0890772	-4.64372	3.422e-06	3.1932e-05	Down Regulated in Acute
ENSG00000175130.6	MARCKSL1	protein_coding	819.855	-0.949172	0.204515	-4.64108	3.46585e-06	3.23239e-05	Down Regulated in Acute
ENSG00000107201.9	DDX58	protein_coding	1708.53	1.04262	0.22475	4.63903	3.50049e-06	3.26291e-05	Up Regulated in Acute
ENSG00000197381.15	ADARB1	protein_coding	566.765	-1.05037	0.226435	-4.63873	3.50562e-06	3.26591e-05	Down Regulated in Acute
ENSG00000013275.7	PSMC4	protein_coding	1363.28	0.728725	0.157112	4.63826	3.5136e-06	3.27154e-05	Up Regulated in Acute
ENSG00000128536.15	CDHR3	protein_coding	61.3741	-1.65227	0.356256	-4.63787	3.52025e-06	3.27595e-05	Down Regulated in Acute
ENSG00000135956.8	TMEM127	protein_coding	2316.9	-0.642173	0.138529	-4.63567	3.55785e-06	3.30913e-05	Down Regulated in Acute
ENSG00000176155.18	CCDC57	protein_coding	634.416	-0.625144	0.134876	-4.63497	3.56993e-06	3.31856e-05	Down Regulated in Acute
ENSG00000115806.12	GORASP2	protein_coding	1517.53	0.78401	0.169163	4.63464	3.57551e-06	3.32192e-05	Up Regulated in Acute
ENSG00000170502.12	NUDT9	protein_coding	291.8	0.760903	0.164203	4.63391	3.58818e-06	3.33188e-05	Up Regulated in Acute
ENSG00000105676.13	ARMC6	protein_coding	311.653	0.807982	0.174399	4.63295	3.60484e-06	3.34553e-05	Up Regulated in Acute
ENSG00000155304.5	HSPA13	protein_coding	744.256	1.84474	0.39821	4.63258	3.61137e-06	3.34976e-05	Up Regulated in Acute
ENSG00000134470.19	IL15RA	protein_coding	308.075	1.31091	0.283078	4.6309	3.64071e-06	3.37514e-05	Up Regulated in Acute
ENSG00000198356.11	ASNA1	protein_coding	978.335	0.486243	0.10503	4.62955	3.66469e-06	3.39552e-05	Up Regulated in Acute
ENSG00000203666.12	EFCAB2	protein_coding	124.467	0.98018	0.21175	4.62896	3.675e-06	3.40209e-05	Up Regulated in Acute
ENSG00000213551.4	DNAJC9	protein_coding	886.844	0.92031	0.198817	4.62892	3.67577e-06	3.40209e-05	Up Regulated in Acute
ENSG00000116005.11	PCYOX1	protein_coding	337.087	-0.673458	0.145497	-4.62868	3.68013e-06	3.40427e-05	Down Regulated in Acute
ENSG00000117640.17	MTFR1L	protein_coding	1121.96	-0.664955	0.143702	-4.62732	3.70434e-06	3.42481e-05	Down Regulated in Acute
ENSG00000163832.15	ELP6	protein_coding	412.507	0.933627	0.201954	4.62297	3.78281e-06	3.49356e-05	Up Regulated in Acute
ENSG00000167994.11	RAB3IL1	protein_coding	12.6432	2.93943	0.635819	4.62307	3.78108e-06	3.49356e-05	Up Regulated in Acute
ENSG00000139266.5	MARCH9	protein_coding	664.294	-1.28263	0.277528	-4.62163	3.80733e-06	3.5143e-05	Down Regulated in Acute
ENSG00000111199.10	TRPV4	protein_coding	40.3913	1.74815	0.378315	4.62089	3.821e-06	3.52501e-05	Up Regulated in Acute
ENSG00000132423.10	COQ3	protein_coding	112.856	1.12782	0.24425	4.6175	3.884e-06	3.58114e-05	Up Regulated in Acute
ENSG00000141219.15	C17orf80	protein_coding	366.755	0.989704	0.214379	4.61662	3.90047e-06	3.59443e-05	Up Regulated in Acute
ENSG00000120053.10	GOT1	protein_coding	461.525	1.14245	0.247503	4.61593	3.91335e-06	3.60435e-05	Up Regulated in Acute
ENSG00000054690.13	PLEKHH1	protein_coding	21.7947	3.04614	0.660333	4.61303	3.96836e-06	3.65303e-05	Up Regulated in Acute
ENSG00000164615.4	CAMLG	protein_coding	562.341	-0.795864	0.17254	-4.61265	3.97572e-06	3.65783e-05	Down Regulated in Acute
ENSG00000100784.9	RPS6KA5	protein_coding	294.714	-0.967496	0.209784	-4.61187	3.99054e-06	3.66931e-05	Down Regulated in Acute
ENSG00000162545.5	CAMK2N1	protein_coding	46.723	-2.34711	0.50894	-4.61177	3.9925e-06	3.66931e-05	Down Regulated in Acute
ENSG00000161642.17	ZNF385A	protein_coding	1845.67	-1.20458	0.261258	-4.6107	4.01323e-06	3.68637e-05	Down Regulated in Acute
ENSG00000135336.14	ORC3	protein_coding	471.36	0.92351	0.200478	4.60655	4.0941e-06	3.7566e-05	Up Regulated in Acute
ENSG00000166833.19	NAV2	protein_coding	13.8697	-3.07941	0.668477	-4.6066	4.093e-06	3.7566e-05	Down Regulated in Acute
ENSG00000068438.14	FTSJ1	protein_coding	933.075	0.589261	0.127927	4.60624	4.10014e-06	3.76012e-05	Up Regulated in Acute
ENSG00000013573.16	DDX11	protein_coding	793.804	1.12785	0.244948	4.60447	4.1352e-06	3.79023e-05	Up Regulated in Acute
ENSG00000132256.18	TRIM5	protein_coding	723.901	1.17517	0.255305	4.603	4.16458e-06	3.81511e-05	Up Regulated in Acute
ENSG00000149792.8	MRPL49	protein_coding	812.883	0.515558	0.112016	4.60256	4.17338e-06	3.82111e-05	Up Regulated in Acute
ENSG00000060656.19	PTPRU	protein_coding	16.0704	2.42349	0.526903	4.5995	4.2351e-06	3.87345e-05	Up Regulated in Acute
ENSG00000178904.18	DPY19L3	protein_coding	481.421	0.890582	0.193625	4.59952	4.23467e-06	3.87345e-05	Up Regulated in Acute
ENSG00000063587.13	ZNF275	protein_coding	625.924	0.556273	0.121017	4.59666	4.29311e-06	3.92441e-05	Up Regulated in Acute
ENSG00000115840.13	SLC25A12	protein_coding	479.912	0.830738	0.180757	4.59589	4.309e-06	3.93682e-05	Up Regulated in Acute
ENSG00000163251.3	FZD5	protein_coding	59.2939	1.74776	0.380388	4.59467	4.33436e-06	3.95786e-05	Up Regulated in Acute
ENSG00000134684.10	YARS	protein_coding	2248.32	0.675826	0.147143	4.59299	4.36942e-06	3.98666e-05	Up Regulated in Acute
ENSG00000240849.10	TMEM189	protein_coding	542.387	-1.02058	0.222207	-4.59293	4.37058e-06	3.98666e-05	Down Regulated in Acute
ENSG00000155380.11	SLC16A1	protein_coding	377.288	1.55442	0.338595	4.59079	4.41574e-06	4.0257e-05	Up Regulated in Acute
ENSG00000136122.15	BORA	protein_coding	281.694	1.01651	0.221433	4.59059	4.41988e-06	4.02732e-05	Up Regulated in Acute
ENSG00000228672.3	PROB1	protein_coding	38.8197	2.44553	0.532785	4.59009	4.43054e-06	4.03487e-05	Up Regulated in Acute
ENSG00000120539.14	MASTL	protein_coding	299.507	1.42149	0.309872	4.58734	4.48921e-06	4.08612e-05	Up Regulated in Acute
ENSG00000133103.16	COG6	protein_coding	341.323	0.919949	0.20057	4.58667	4.50368e-06	4.09055e-05	Up Regulated in Acute
ENSG00000169508.6	GPR183	protein_coding	1629.49	-1.31796	0.287331	-4.5869	4.49871e-06	4.09055e-05	Down Regulated in Acute
ENSG00000171224.8	C10orf35	protein_coding	29.6482	-1.57739	0.343902	-4.58675	4.5019e-06	4.09055e-05	Down Regulated in Acute
ENSG00000204386.10	NEU1	protein_coding	1248.82	0.770707	0.168025	4.58686	4.49967e-06	4.09055e-05	Up Regulated in Acute
ENSG00000181019.12	NQO1	protein_coding	88.7164	1.77427	0.386939	4.58539	4.53133e-06	4.11346e-05	Up Regulated in Acute
ENSG00000116649.9	SRM	protein_coding	756.638	1.30517	0.284678	4.58473	4.54578e-06	4.12438e-05	Up Regulated in Acute
ENSG00000107175.10	CREB3	protein_coding	580.784	0.960891	0.209613	4.58412	4.55905e-06	4.13422e-05	Up Regulated in Acute
ENSG00000004399.12	PLXND1	protein_coding	1655.75	-0.962253	0.210018	-4.58176	4.61075e-06	4.17888e-05	Down Regulated in Acute
ENSG00000092199.17	HNRNPC	protein_coding	9849.48	0.602745	0.131557	4.58163	4.61362e-06	4.17925e-05	Up Regulated in Acute
ENSG00000106803.9	SEC61B	protein_coding	2024.57	1.24555	0.272064	4.57815	4.69112e-06	4.24719e-05	Up Regulated in Acute
ENSG00000112651.11	MRPL2	protein_coding	418.267	0.763322	0.166791	4.57652	4.72768e-06	4.27575e-05	Up Regulated in Acute
ENSG00000163840.9	DTX3L	protein_coding	2338.54	0.99421	0.217238	4.57659	4.72606e-06	4.27575e-05	Up Regulated in Acute
ENSG00000113231.13	PDE8B	protein_coding	10.8703	-2.97924	0.65135	-4.57395	4.7861e-06	4.32629e-05	Down Regulated in Acute
ENSG00000176845.12	METRNL	protein_coding	496.031	-1.33298	0.291509	-4.5727	4.81483e-06	4.34995e-05	Down Regulated in Acute
ENSG00000133961.19	NUMB	protein_coding	2586.12	-0.463919	0.101518	-4.56984	4.881e-06	4.40741e-05	Down Regulated in Acute
ENSG00000111052.7	LIN7A	protein_coding	193.754	-1.46544	0.320719	-4.56922	4.89537e-06	4.41803e-05	Down Regulated in Acute
ENSG00000181192.11	DHTKD1	protein_coding	510.332	0.706002	0.154616	4.56617	4.96715e-06	4.48043e-05	Up Regulated in Acute
ENSG00000167658.15	EEF2	protein_coding	19659.9	-0.874203	0.191569	-4.56339	5.0335e-06	4.53788e-05	Down Regulated in Acute
ENSG00000188243.12	COMMD6	protein_coding	1999.38	-1.05106	0.230377	-4.56235	5.05838e-06	4.5579e-05	Down Regulated in Acute
ENSG00000131370.15	SH3BP5	protein_coding	1489.52	-0.66262	0.145248	-4.562	5.06679e-06	4.56306e-05	Down Regulated in Acute
ENSG00000141506.13	PIK3R5	protein_coding	3459.06	-0.666197	0.146049	-4.56145	5.08008e-06	4.57261e-05	Down Regulated in Acute
ENSG00000171236.9	LRG1	protein_coding	209.592	-1.7454	0.382693	-4.56084	5.095e-06	4.58357e-05	Down Regulated in Acute
ENSG00000254986.7	DPP3	protein_coding	590.408	0.918801	0.201636	4.55674	5.19533e-06	4.6714e-05	Up Regulated in Acute
ENSG00000077063.10	CTTNBP2	protein_coding	11.4147	-4.96297	1.08921	-4.55648	5.20172e-06	4.67468e-05	Down Regulated in Acute
ENSG00000058091.16	CDK14	protein_coding	300.19	1.01777	0.223412	4.55558	5.22414e-06	4.69236e-05	Up Regulated in Acute
ENSG00000100147.13	CCDC134	protein_coding	95.2341	1.18321	0.259768	4.55486	5.24193e-06	4.70586e-05	Up Regulated in Acute
ENSG00000164849.8	GPR146	protein_coding	45.5231	-1.8539	0.407117	-4.55373	5.27037e-06	4.72889e-05	Down Regulated in Acute
ENSG00000278195.1	SSTR3	protein_coding	159.924	1.45084	0.318617	4.55357	5.27441e-06	4.73003e-05	Up Regulated in Acute
ENSG00000124196.5	GTSF1L	protein_coding	12.4178	2.66382	0.585052	4.55314	5.28515e-06	4.73717e-05	Up Regulated in Acute
ENSG00000188322.4	SBK1	protein_coding	234.208	-1.22461	0.268985	-4.55269	5.29646e-06	4.7448e-05	Down Regulated in Acute
ENSG00000213658.10	LAT	protein_coding	118.869	-1.18894	0.261248	-4.55099	5.33934e-06	4.7807e-05	Down Regulated in Acute
ENSG00000158042.8	MRPL17	protein_coding	480.617	0.851086	0.187083	4.54923	5.38416e-06	4.81614e-05	Up Regulated in Acute
ENSG00000205268.10	PDE7A	protein_coding	2110.78	-0.584404	0.128463	-4.54922	5.38457e-06	4.81614e-05	Down Regulated in Acute
ENSG00000170390.14	DCLK2	protein_coding	10.941	-2.53333	0.557056	-4.5477	5.42345e-06	4.84836e-05	Down Regulated in Acute
ENSG00000119772.16	DNMT3A	protein_coding	811.535	-0.745742	0.163989	-4.54751	5.42843e-06	4.85027e-05	Down Regulated in Acute
ENSG00000064115.10	TM7SF3	protein_coding	844.952	0.58697	0.129111	4.54624	5.46122e-06	4.87701e-05	Up Regulated in Acute
ENSG00000183354.11	KIAA2026	protein_coding	867.85	-0.901632	0.198448	-4.54341	5.53515e-06	4.94044e-05	Down Regulated in Acute
ENSG00000147234.10	FRMPD3	protein_coding	32.156	-1.91363	0.42126	-4.54263	5.55562e-06	4.95441e-05	Down Regulated in Acute
ENSG00000180817.11	PPA1	protein_coding	2113.14	0.908416	0.199977	4.54259	5.55662e-06	4.95441e-05	Up Regulated in Acute
ENSG00000110400.10	PVRL1	protein_coding	118.953	-1.62372	0.35749	-4.54199	5.57249e-06	4.96596e-05	Down Regulated in Acute
ENSG00000104290.10	FZD3	protein_coding	82.44	1.03078	0.227127	4.53836	5.66945e-06	5.04972e-05	Up Regulated in Acute
ENSG00000116062.14	MSH6	protein_coding	824.103	0.752537	0.165853	4.53738	5.69573e-06	5.07048e-05	Up Regulated in Acute
ENSG00000152291.13	TGOLN2	protein_coding	6453.92	-0.615103	0.13565	-4.53447	5.77471e-06	5.1381e-05	Down Regulated in Acute
ENSG00000143226.13	FCGR2A	protein_coding	3094.82	-0.845429	0.186557	-4.53175	5.8498e-06	5.2022e-05	Down Regulated in Acute
ENSG00000084731.13	KIF3C	protein_coding	68.6646	-0.976602	0.215508	-4.53163	5.85312e-06	5.20243e-05	Down Regulated in Acute
ENSG00000065675.14	PRKCQ	protein_coding	745.074	-0.84976	0.187583	-4.53006	5.89671e-06	5.23844e-05	Down Regulated in Acute
ENSG00000124831.18	LRRFIP1	protein_coding	4547.81	-0.721077	0.159239	-4.52827	5.94676e-06	5.28015e-05	Down Regulated in Acute
ENSG00000082213.17	C5orf22	protein_coding	344.438	0.648506	0.143216	4.52816	5.95e-06	5.28028e-05	Up Regulated in Acute
ENSG00000138767.12	CNOT6L	protein_coding	1574.33	-0.795392	0.175668	-4.52781	5.95983e-06	5.28625e-05	Down Regulated in Acute
ENSG00000084676.15	NCOA1	protein_coding	1442.78	-0.798164	0.176317	-4.52687	5.98625e-06	5.30692e-05	Down Regulated in Acute
ENSG00000136052.9	SLC41A2	protein_coding	45.1532	1.61859	0.357595	4.52633	6.00167e-06	5.31505e-05	Up Regulated in Acute
ENSG00000177084.16	POLE	protein_coding	1046.05	0.688682	0.15215	4.52633	6.00162e-06	5.31505e-05	Up Regulated in Acute
ENSG00000114302.15	PRKAR2A	protein_coding	865.599	-0.802227	0.177287	-4.52502	6.039e-06	5.34536e-05	Down Regulated in Acute
ENSG00000129128.12	SPCS3	protein_coding	3667.89	0.863146	0.190755	4.52489	6.04282e-06	5.34594e-05	Up Regulated in Acute
ENSG00000165272.14	AQP3	protein_coding	1650.69	1.46862	0.324606	4.52432	6.05914e-06	5.35759e-05	Up Regulated in Acute
ENSG00000188158.14	NHS	protein_coding	72.1418	-1.64728	0.364214	-4.52283	6.1019e-06	5.39259e-05	Down Regulated in Acute
ENSG00000163516.13	ANKZF1	protein_coding	1891.59	-0.588652	0.130213	-4.52069	6.16372e-06	5.44441e-05	Down Regulated in Acute
ENSG00000005700.14	IBTK	protein_coding	1259.2	0.672774	0.148836	4.52024	6.1771e-06	5.4534e-05	Up Regulated in Acute
ENSG00000149503.12	INCENP	protein_coding	200.884	1.55824	0.344783	4.51948	6.19927e-06	5.47013e-05	Up Regulated in Acute
ENSG00000108384.14	RAD51C	protein_coding	266.614	1.33995	0.296559	4.51831	6.23347e-06	5.49746e-05	Up Regulated in Acute
ENSG00000189091.12	SF3B3	protein_coding	2338.56	0.635452	0.140657	4.51774	6.25044e-06	5.50958e-05	Up Regulated in Acute
ENSG00000133606.10	MKRN1	protein_coding	3731.52	-0.560823	0.124174	-4.51642	6.28934e-06	5.53899e-05	Down Regulated in Acute
ENSG00000137801.10	THBS1	protein_coding	3783.24	-3.02977	0.670838	-4.51639	6.29031e-06	5.53899e-05	Down Regulated in Acute
ENSG00000135686.12	KLHL36	protein_coding	977.428	-0.764992	0.169421	-4.51534	6.32163e-06	5.56369e-05	Down Regulated in Acute
ENSG00000066455.12	GOLGA5	protein_coding	853.112	0.760272	0.16842	4.51413	6.35769e-06	5.59254e-05	Up Regulated in Acute
ENSG00000138443.15	ABI2	protein_coding	389.841	-0.570056	0.126305	-4.51335	6.38122e-06	5.61034e-05	Down Regulated in Acute
ENSG00000065057.7	NTHL1	protein_coding	121.929	1.06264	0.235462	4.513	6.39157e-06	5.6159e-05	Up Regulated in Acute
ENSG00000120708.16	TGFBI	protein_coding	6840.75	-0.919812	0.203818	-4.51292	6.39414e-06	5.6159e-05	Down Regulated in Acute
ENSG00000008277.14	ADAM22	protein_coding	56.5274	-1.82086	0.403538	-4.51224	6.41462e-06	5.63098e-05	Down Regulated in Acute
ENSG00000109103.11	UNC119	protein_coding	1412.7	-0.747267	0.165622	-4.51189	6.42515e-06	5.63731e-05	Down Regulated in Acute
ENSG00000126759.12	CFP	protein_coding	4409.9	-1.01077	0.224052	-4.51129	6.44331e-06	5.65034e-05	Down Regulated in Acute
ENSG00000240038.6	AMY2B	protein_coding	670.896	-0.76222	0.168968	-4.51104	6.45108e-06	5.65424e-05	Down Regulated in Acute
ENSG00000141378.14	PTRH2	protein_coding	460.52	0.733428	0.162635	4.50965	6.49341e-06	5.68842e-05	Up Regulated in Acute
ENSG00000158062.20	UBXN11	protein_coding	3748.15	-0.747594	0.165831	-4.50817	6.53885e-06	5.72527e-05	Down Regulated in Acute
ENSG00000088682.13	COQ9	protein_coding	536.219	0.795616	0.176507	4.50757	6.55728e-06	5.73846e-05	Up Regulated in Acute
ENSG00000134901.12	KDELC1	protein_coding	24.3468	2.48011	0.550261	4.50715	6.57047e-06	5.74705e-05	Up Regulated in Acute
ENSG00000168056.14	LTBP3	protein_coding	463.424	-1.27276	0.282421	-4.50662	6.58694e-06	5.7585e-05	Down Regulated in Acute
ENSG00000196123.12	KIAA0895L	protein_coding	353.302	0.741907	0.164636	4.50634	6.59544e-06	5.76297e-05	Up Regulated in Acute
ENSG00000135519.6	KCNH3	protein_coding	67.7132	-1.38249	0.306814	-4.50594	6.60786e-06	5.76961e-05	Down Regulated in Acute
ENSG00000169136.8	ATF5	protein_coding	448.54	0.866698	0.192348	4.50588	6.60981e-06	5.76961e-05	Up Regulated in Acute
ENSG00000110367.11	DDX6	protein_coding	3170.65	-0.439482	0.0975379	-4.50576	6.61361e-06	5.76997e-05	Down Regulated in Acute
ENSG00000079432.7	CIC	protein_coding	884.939	-0.845413	0.187647	-4.50534	6.62678e-06	5.77849e-05	Down Regulated in Acute
ENSG00000116489.12	CAPZA1	protein_coding	5194.52	0.69135	0.153456	4.50521	6.63066e-06	5.77892e-05	Up Regulated in Acute
ENSG00000197608.11	ZNF841	protein_coding	382.211	0.882724	0.195952	4.5048	6.64358e-06	5.78722e-05	Up Regulated in Acute
ENSG00000128944.13	KNSTRN	protein_coding	275.785	1.44998	0.321928	4.50405	6.667e-06	5.80466e-05	Up Regulated in Acute
ENSG00000103852.12	TTC23	protein_coding	32.2675	1.83807	0.408161	4.5033	6.69072e-06	5.82232e-05	Up Regulated in Acute
ENSG00000169813.16	HNRNPF	protein_coding	3577.01	0.489349	0.108674	4.50292	6.70266e-06	5.82974e-05	Up Regulated in Acute
ENSG00000125510.15	OPRL1	protein_coding	181.133	-1.1793	0.261962	-4.50181	6.73782e-06	5.85733e-05	Down Regulated in Acute
ENSG00000264364.2	DYNLL2	protein_coding	1311.86	-0.66899	0.14861	-4.50165	6.7428e-06	5.85867e-05	Down Regulated in Acute
ENSG00000171813.13	PWWP2B	protein_coding	120.914	-0.963177	0.214048	-4.49981	6.80139e-06	5.90656e-05	Down Regulated in Acute
ENSG00000131467.10	PSME3	protein_coding	1820.36	0.627143	0.139382	4.49946	6.81261e-06	5.91329e-05	Up Regulated in Acute
ENSG00000203797.9	DDO	protein_coding	51.4931	1.67978	0.373493	4.49748	6.87624e-06	5.96548e-05	Up Regulated in Acute
ENSG00000154310.16	TNIK	protein_coding	444.52	-1.0033	0.223134	-4.4964	6.91132e-06	5.99286e-05	Down Regulated in Acute
ENSG00000113282.13	CLINT1	protein_coding	2128.96	1.15609	0.257281	4.49348	7.00672e-06	6.07249e-05	Up Regulated in Acute
ENSG00000142856.16	ITGB3BP	protein_coding	289.176	1.2242	0.272447	4.49337	7.01057e-06	6.07273e-05	Up Regulated in Acute
ENSG00000145103.12	ILDR1	protein_coding	22.3827	2.08338	0.463742	4.49253	7.03813e-06	6.09351e-05	Up Regulated in Acute
ENSG00000271601.3	LIX1L	protein_coding	655.332	-0.82867	0.184471	-4.49214	7.051e-06	6.10159e-05	Down Regulated in Acute
ENSG00000115514.11	TXNDC9	protein_coding	422.054	0.848073	0.188801	4.49189	7.05942e-06	6.10573e-05	Up Regulated in Acute
ENSG00000136827.11	TOR1A	protein_coding	951.722	0.745664	0.166039	4.49091	7.09205e-06	6.13085e-05	Up Regulated in Acute
ENSG00000104870.12	FCGRT	protein_coding	3725.96	-1.01342	0.225667	-4.49077	7.09673e-06	6.13177e-05	Down Regulated in Acute
ENSG00000019169.10	MARCO	protein_coding	632.876	1.30097	0.289764	4.48976	7.13042e-06	6.15662e-05	Up Regulated in Acute
ENSG00000130147.15	SH3BP4	protein_coding	75.8259	-1.36808	0.304715	-4.48969	7.13271e-06	6.15662e-05	Down Regulated in Acute
ENSG00000057294.13	PKP2	protein_coding	15.7464	-3.66179	0.81573	-4.48897	7.15687e-06	6.17435e-05	Down Regulated in Acute
ENSG00000163682.15	RPL9	protein_coding	34544.8	-1.25517	0.27964	-4.4885	7.17252e-06	6.18471e-05	Down Regulated in Acute
ENSG00000143797.11	MBOAT2	protein_coding	81.2831	-1.76699	0.393931	-4.48554	7.27281e-06	6.26801e-05	Down Regulated in Acute
ENSG00000179583.17	CIITA	protein_coding	2490.62	-1.02229	0.227989	-4.48396	7.32707e-06	6.31158e-05	Down Regulated in Acute
ENSG00000107738.19	C10orf54	protein_coding	9810.03	-0.713339	0.159106	-4.48341	7.34584e-06	6.32455e-05	Down Regulated in Acute
ENSG00000184988.8	TMEM106A	protein_coding	525.596	0.870341	0.194179	4.48216	7.38917e-06	6.35865e-05	Up Regulated in Acute
ENSG00000116752.5	BCAS2	protein_coding	515.376	0.758149	0.169192	4.48099	7.42975e-06	6.39033e-05	Up Regulated in Acute
ENSG00000005486.16	RHBDD2	protein_coding	684.577	-0.85145	0.190034	-4.48052	7.44631e-06	6.40135e-05	Down Regulated in Acute
ENSG00000111445.13	RFC5	protein_coding	329.36	0.975793	0.217852	4.47915	7.494e-06	6.43584e-05	Up Regulated in Acute
ENSG00000145685.13	LHFPL2	protein_coding	438.781	1.27046	0.283635	4.4792	7.49238e-06	6.43584e-05	Up Regulated in Acute
ENSG00000183520.11	UTP11L	protein_coding	486.949	1.01986	0.227785	4.47729	7.55948e-06	6.48881e-05	Up Regulated in Acute
ENSG00000100060.17	MFNG	protein_coding	1865.47	-0.618721	0.138281	-4.47438	7.66337e-06	6.57467e-05	Down Regulated in Acute
ENSG00000164347.17	GFM2	protein_coding	559.782	0.595588	0.133122	4.47398	7.67756e-06	6.58353e-05	Up Regulated in Acute
ENSG00000044090.8	CUL7	protein_coding	562.372	0.619356	0.138499	4.47191	7.75247e-06	6.64442e-05	Up Regulated in Acute
ENSG00000065882.15	TBC1D1	protein_coding	2318.92	0.661163	0.147876	4.47105	7.78361e-06	6.66775e-05	Up Regulated in Acute
ENSG00000156697.12	UTP14A	protein_coding	531.247	0.767186	0.171601	4.47076	7.79405e-06	6.67334e-05	Up Regulated in Acute
ENSG00000188313.12	PLSCR1	protein_coding	2411.56	1.16645	0.261017	4.46885	7.86421e-06	6.73003e-05	Up Regulated in Acute
ENSG00000179456.10	ZBTB18	protein_coding	872.298	-0.962054	0.21536	-4.46718	7.92583e-06	6.77935e-05	Down Regulated in Acute
ENSG00000175634.14	RPS6KB2	protein_coding	989.537	0.45119	0.101022	4.46627	7.95945e-06	6.80128e-05	Up Regulated in Acute
ENSG00000198815.8	FOXJ3	protein_coding	1205.38	-0.540607	0.121042	-4.46628	7.95928e-06	6.80128e-05	Down Regulated in Acute
ENSG00000108592.16	FTSJ3	protein_coding	1098.31	0.529605	0.118599	4.46552	7.98752e-06	6.82184e-05	Up Regulated in Acute
ENSG00000168172.8	HOOK3	protein_coding	990.316	-0.942116	0.210989	-4.46525	7.99757e-06	6.827e-05	Down Regulated in Acute
ENSG00000105829.11	BET1	protein_coding	401.341	0.977215	0.218891	4.46438	8.03e-06	6.85127e-05	Up Regulated in Acute
ENSG00000159147.17	DONSON	protein_coding	282.915	1.15159	0.258043	4.4628	8.08959e-06	6.89863e-05	Up Regulated in Acute
ENSG00000143434.15	SEMA6C	protein_coding	28.4056	-1.41622	0.31735	-4.46265	8.0954e-06	6.90013e-05	Down Regulated in Acute
ENSG00000160613.12	PCSK7	protein_coding	3049.22	-0.826491	0.185217	-4.4623	8.10851e-06	6.90785e-05	Down Regulated in Acute
[truncated: 3,630 more rows]

## Sheet: Recovered-vs-Acute (Severity 1)
ID	GeneName	BioType	baseMean	log2FoldChange	lfcSE	stat	pvalue	padj	Significance
ENSG00000002549.12	LAP3	protein_coding	3892.45	1.66726	0.3325	5.01432	5.3221e-07	3.39935e-05	Up Regulated in Acute
ENSG00000002933.7	TMEM176A	protein_coding	732.854	-1.26215	0.270716	-4.66229	3.12709e-06	0.000149049	Down Regulated in Acute
ENSG00000003400.14	CASP10	protein_coding	1667.06	0.9114	0.252413	3.61075	0.000305315	0.00619759	Up Regulated in Acute
ENSG00000003436.14	TFPI	protein_coding	11.3844	3.86596	1.31321	2.94391	0.0032409	0.0366969	Up Regulated in Acute
ENSG00000004399.12	PLXND1	protein_coding	1190.1	-0.999412	0.318695	-3.13596	0.00171295	0.0233662	Down Regulated in Acute
ENSG00000004468.12	CD38	protein_coding	3183.51	4.08761	0.423239	9.65793	4.54974e-22	1.83787e-18	Up Regulated in Acute
ENSG00000004777.18	ARHGAP33	protein_coding	126.73	-1.38457	0.478361	-2.89442	0.00379865	0.0411661	Down Regulated in Acute
ENSG00000005187.11	ACSM3	protein_coding	97.583	-1.28723	0.416975	-3.08708	0.00202133	0.0260954	Down Regulated in Acute
ENSG00000005189.19	AC004381.6	protein_coding	40.2164	2.74067	0.621404	4.41046	1.03153e-05	0.00040455	Up Regulated in Acute
ENSG00000005339.12	CREBBP	protein_coding	1397.56	-1.00006	0.313555	-3.18942	0.00142557	0.0204643	Down Regulated in Acute
ENSG00000005381.7	MPO	protein_coding	199.753	1.31837	0.45118	2.92204	0.00347746	0.0386177	Up Regulated in Acute
ENSG00000005486.16	RHBDD2	protein_coding	603.665	-1.19025	0.371983	-3.19975	0.00137546	0.0199504	Down Regulated in Acute
ENSG00000005884.17	ITGA3	protein_coding	95.666	1.80353	0.535898	3.36543	0.000764248	0.0128099	Up Regulated in Acute
ENSG00000006530.15	AGK	protein_coding	493.968	1.50135	0.409871	3.66297	0.000249307	0.00529609	Up Regulated in Acute
ENSG00000006747.14	SCIN	protein_coding	32.5282	2.51555	0.74377	3.38216	0.000719187	0.012181	Up Regulated in Acute
ENSG00000007264.13	MATK	protein_coding	263.875	-1.35814	0.350047	-3.87987	0.000104512	0.0026203	Down Regulated in Acute
ENSG00000007314.11	SCN4A	protein_coding	22.439	-2.6388	0.883758	-2.98588	0.00282762	0.0333251	Down Regulated in Acute
ENSG00000007350.16	TKTL1	protein_coding	89.8226	-1.69333	0.549585	-3.08112	0.00206225	0.026488	Down Regulated in Acute
ENSG00000007402.11	CACNA2D2	protein_coding	134.399	-1.71943	0.533346	-3.22386	0.00126475	0.0187313	Down Regulated in Acute
ENSG00000007516.13	BAIAP3	protein_coding	116.075	-2.07997	0.513239	-4.05262	5.06464e-05	0.00147184	Down Regulated in Acute
ENSG00000007968.6	E2F2	protein_coding	619.848	1.85885	0.27451	6.77153	1.27429e-11	3.8849e-09	Up Regulated in Acute
ENSG00000008256.15	CYTH3	protein_coding	148.165	-1.58556	0.384029	-4.12874	3.64751e-05	0.00112474	Down Regulated in Acute
ENSG00000008513.14	ST3GAL1	protein_coding	2314.36	-1.31438	0.395376	-3.32439	0.000886137	0.0143469	Down Regulated in Acute
ENSG00000008710.17	PKD1	protein_coding	251.218	-1.07983	0.359306	-3.00532	0.00265303	0.0318719	Down Regulated in Acute
ENSG00000009694.13	TENM1	protein_coding	81.832	-1.81377	0.568939	-3.18798	0.0014327	0.0204865	Down Regulated in Acute
ENSG00000009844.15	VTA1	protein_coding	630.778	1.03969	0.303069	3.43054	0.000602382	0.0105797	Up Regulated in Acute
ENSG00000010030.13	ETV7	protein_coding	150.099	3.37017	0.639572	5.26942	1.36858e-07	1.07224e-05	Up Regulated in Acute
ENSG00000010310.8	GIPR	protein_coding	128.167	1.43705	0.504931	2.84602	0.00442691	0.0460296	Up Regulated in Acute
ENSG00000010671.15	BTK	protein_coding	2440.65	0.990752	0.310244	3.19346	0.00140578	0.0202628	Up Regulated in Acute
ENSG00000010810.17	FYN	protein_coding	3345.95	-0.860775	0.269298	-3.19637	0.00139171	0.0201331	Down Regulated in Acute
ENSG00000011426.10	ANLN	protein_coding	85.3834	4.5553	0.639299	7.12545	1.03739e-12	4.91415e-10	Up Regulated in Acute
ENSG00000011590.13	ZBTB32	protein_coding	164.424	3.33533	0.555315	6.0062	1.8992e-09	2.97935e-07	Up Regulated in Acute
ENSG00000012048.19	BRCA1	protein_coding	192.122	2.164	0.3487	6.20592	5.43793e-10	1.03372e-07	Up Regulated in Acute
ENSG00000013375.15	PGM3	protein_coding	442.415	1.7356	0.42265	4.10646	4.01768e-05	0.00121569	Up Regulated in Acute
ENSG00000013725.14	CD6	protein_coding	2718.64	-1.31421	0.372076	-3.53209	0.000412295	0.00780991	Down Regulated in Acute
ENSG00000014641.17	MDH1	protein_coding	1836.96	0.99187	0.31872	3.11204	0.00185798	0.024648	Up Regulated in Acute
ENSG00000017427.15	IGF1	protein_coding	80.6562	3.87469	0.786794	4.92466	8.45063e-07	4.9117e-05	Up Regulated in Acute
ENSG00000017483.14	SLC38A5	protein_coding	588.098	2.08588	0.362809	5.74927	8.96316e-09	1.07279e-06	Up Regulated in Acute
ENSG00000019169.10	MARCO	protein_coding	470.736	1.21773	0.351225	3.46709	0.000526123	0.00947726	Up Regulated in Acute
ENSG00000020633.18	RUNX3	protein_coding	5019.68	-1.93893	0.417786	-4.64096	3.46802e-06	0.000163849	Down Regulated in Acute
ENSG00000021300.13	PLEKHB1	protein_coding	207.4	-1.59222	0.408861	-3.89429	9.84884e-05	0.0025061	Down Regulated in Acute
ENSG00000023318.7	ERP44	protein_coding	2104.45	0.735781	0.249921	2.94405	0.00323945	0.0366969	Up Regulated in Acute
ENSG00000023330.14	ALAS1	protein_coding	471.387	1.96785	0.535291	3.67623	0.000236705	0.00508601	Up Regulated in Acute
ENSG00000023445.13	BIRC3	protein_coding	3254.79	-1.14417	0.38392	-2.98022	0.00288039	0.0336372	Down Regulated in Acute
ENSG00000023839.10	ABCC2	protein_coding	71.1894	1.63277	0.577625	2.82669	0.00470315	0.0479152	Up Regulated in Acute
ENSG00000024526.16	DEPDC1	protein_coding	50.2595	3.80064	0.913262	4.16161	3.16014e-05	0.000993718	Up Regulated in Acute
ENSG00000026297.15	RNASET2	protein_coding	2215.37	-0.934853	0.323482	-2.88997	0.0038528	0.0416134	Down Regulated in Acute
ENSG00000026508.16	CD44	protein_coding	8207.41	-1.04163	0.238363	-4.36993	1.24287e-05	0.000471414	Down Regulated in Acute
ENSG00000026652.13	AGPAT4	protein_coding	455.978	-1.23409	0.319755	-3.8595	0.00011362	0.00278301	Down Regulated in Acute
ENSG00000026751.16	SLAMF7	protein_coding	4562.8	2.07614	0.33741	6.15316	7.59551e-10	1.37897e-07	Up Regulated in Acute
ENSG00000027075.13	PRKCH	protein_coding	1412.25	-1.05997	0.281975	-3.7591	0.000170529	0.00393629	Down Regulated in Acute
ENSG00000028137.16	TNFRSF1B	protein_coding	9877.01	-1.05623	0.299477	-3.52693	0.000420411	0.00790316	Down Regulated in Acute
ENSG00000028277.20	POU2F2	protein_coding	3664.99	-1.26261	0.415971	-3.03533	0.0024027	0.029795	Down Regulated in Acute
ENSG00000029153.14	ARNTL2	protein_coding	64.1264	2.10747	0.590812	3.56708	0.000360987	0.00697707	Up Regulated in Acute
ENSG00000029993.14	HMGB3	protein_coding	262.802	2.00305	0.457403	4.37917	1.19131e-05	0.000455383	Up Regulated in Acute
ENSG00000030110.12	BAK1	protein_coding	941.447	1.43245	0.305958	4.68185	2.84297e-06	0.000137535	Up Regulated in Acute
ENSG00000031691.6	CENPQ	protein_coding	81.0435	1.96773	0.660313	2.98	0.00288252	0.0336372	Up Regulated in Acute
ENSG00000033170.16	FUT8	protein_coding	371.225	1.20008	0.30685	3.91097	9.19254e-05	0.00236586	Up Regulated in Acute
ENSG00000033867.16	SLC4A7	protein_coding	559.422	-1.10592	0.379495	-2.91418	0.00356624	0.0393428	Down Regulated in Acute
ENSG00000034053.14	APBA2	protein_coding	326.686	-1.47462	0.369887	-3.98669	6.70002e-05	0.00184428	Down Regulated in Acute
ENSG00000035499.12	DEPDC1B	protein_coding	97.5861	3.74429	0.599988	6.24061	4.35875e-10	8.48539e-08	Up Regulated in Acute
ENSG00000035720.7	STAP1	protein_coding	440.293	1.19364	0.357308	3.34065	0.000835838	0.0136695	Up Regulated in Acute
ENSG00000038210.12	PI4K2B	protein_coding	302.666	1.51496	0.456806	3.31642	0.000911785	0.0146614	Up Regulated in Acute
ENSG00000040275.16	SPDL1	protein_coding	208.314	1.34253	0.38367	3.49917	0.000466712	0.00855974	Up Regulated in Acute
ENSG00000042286.14	AIFM2	protein_coding	99.5555	1.57775	0.55005	2.86837	0.00412598	0.0435622	Up Regulated in Acute
ENSG00000044574.7	HSPA5	protein_coding	12892.5	1.6285	0.365938	4.45022	8.57832e-06	0.000353593	Up Regulated in Acute
ENSG00000048462.10	TNFRSF17	protein_coding	2031.86	3.6653	0.611563	5.99334	2.05578e-09	3.16355e-07	Up Regulated in Acute
ENSG00000049239.12	H6PD	protein_coding	907.524	-1.06055	0.327918	-3.23418	0.00121992	0.0182611	Down Regulated in Acute
ENSG00000049247.13	UTS2	protein_coding	19.9661	-2.86728	0.838192	-3.42079	0.000624399	0.0108368	Down Regulated in Acute
ENSG00000049656.13	CLPTM1L	protein_coding	1777.78	1.32619	0.367366	3.61	0.000306193	0.0062076	Up Regulated in Acute
ENSG00000051180.16	RAD51	protein_coding	121.724	3.50576	0.685334	5.11539	3.13085e-07	2.13453e-05	Up Regulated in Acute
ENSG00000051341.13	POLQ	protein_coding	175.217	2.52953	0.593261	4.26377	2.01005e-05	0.000696961	Up Regulated in Acute
ENSG00000051596.9	THOC3	protein_coding	143.774	1.10783	0.3741	2.96132	0.00306323	0.0352597	Up Regulated in Acute
ENSG00000053254.15	FOXN3	protein_coding	1762.27	-0.727191	0.254663	-2.8555	0.00429688	0.044938	Down Regulated in Acute
ENSG00000053918.15	KCNQ1	protein_coding	405.271	-0.990338	0.3147	-3.14693	0.00164994	0.0227667	Down Regulated in Acute
ENSG00000055130.15	CUL1	protein_coding	1775.49	0.969335	0.308891	3.13811	0.00170042	0.0233386	Up Regulated in Acute
ENSG00000055483.19	USP36	protein_coding	1097.24	-1.14928	0.342278	-3.35774	0.000785829	0.0130498	Down Regulated in Acute
ENSG00000056558.10	TRAF1	protein_coding	957.061	-1.03366	0.300474	-3.4401	0.000581493	0.0102686	Down Regulated in Acute
ENSG00000058262.9	SEC61A1	protein_coding	4316.68	1.13507	0.270709	4.19295	2.75351e-05	0.000895195	Up Regulated in Acute
ENSG00000058453.16	CROCC	protein_coding	163.662	-1.12802	0.363016	-3.10736	0.00188769	0.0248584	Down Regulated in Acute
ENSG00000058668.14	ATP2B4	protein_coding	1793.05	-0.872363	0.290271	-3.00534	0.0026528	0.0318719	Down Regulated in Acute
ENSG00000058866.14	DGKG	protein_coding	138.11	-1.47369	0.448613	-3.28499	0.00101988	0.0159566	Down Regulated in Acute
ENSG00000059573.8	ALDH18A1	protein_coding	644.398	1.32962	0.363002	3.66284	0.000249432	0.00529609	Up Regulated in Acute
ENSG00000059691.11	GATB	protein_coding	289.726	1.15777	0.370896	3.12155	0.001799	0.0240631	Up Regulated in Acute
ENSG00000059804.15	SLC2A3	protein_coding	3315.11	-1.34293	0.3477	-3.86232	0.000112314	0.00276641	Down Regulated in Acute
ENSG00000060558.3	GNA15	protein_coding	390.142	-0.905555	0.303635	-2.98238	0.00286012	0.0335369	Down Regulated in Acute
ENSG00000061656.9	SPAG4	protein_coding	24.8723	2.52155	0.826491	3.05091	0.0022815	0.0286659	Up Regulated in Acute
ENSG00000062822.12	POLD1	protein_coding	133.378	1.17498	0.409335	2.87046	0.0040987	0.0433706	Up Regulated in Acute
ENSG00000063127.15	SLC6A16	protein_coding	90.6854	-1.43148	0.433067	-3.30545	0.000948242	0.0150904	Down Regulated in Acute
ENSG00000063169.10	GLTSCR1	protein_coding	172.863	-1.5912	0.455378	-3.49423	0.000475425	0.00868995	Down Regulated in Acute
ENSG00000063241.7	ISOC2	protein_coding	254.902	1.30826	0.442031	2.95966	0.00307978	0.0353934	Up Regulated in Acute
ENSG00000064102.14	ASUN	protein_coding	433.994	1.11978	0.339088	3.30233	0.000958837	0.0151742	Up Regulated in Acute
ENSG00000064201.15	TSPAN32	protein_coding	731.23	-1.09709	0.340159	-3.22523	0.00125873	0.0186919	Down Regulated in Acute
ENSG00000064547.13	LPAR2	protein_coding	693.2	-1.86544	0.481306	-3.87579	0.000106277	0.00265053	Down Regulated in Acute
ENSG00000065308.4	TRAM2	protein_coding	1488.24	1.86985	0.351762	5.31565	1.06276e-07	8.67279e-06	Up Regulated in Acute
ENSG00000065328.16	MCM10	protein_coding	96.6054	3.82423	0.656373	5.8263	5.66684e-09	7.1535e-07	Up Regulated in Acute
ENSG00000065485.17	PDIA5	protein_coding	414.829	2.12882	0.369708	5.7581	8.50657e-09	1.02574e-06	Up Regulated in Acute
ENSG00000065911.11	MTHFD2	protein_coding	1292.96	1.21522	0.345964	3.51257	0.000443788	0.00823275	Up Regulated in Acute
ENSG00000065970.8	FOXJ2	protein_coding	619.111	-1.06848	0.290897	-3.67304	0.000239684	0.00513635	Down Regulated in Acute
ENSG00000065989.15	PDE4A	protein_coding	437.31	-1.31642	0.364466	-3.61192	0.000303942	0.00619064	Down Regulated in Acute
ENSG00000066135.12	KDM4A	protein_coding	601.529	0.842482	0.29714	2.8353	0.00457827	0.0470583	Up Regulated in Acute
ENSG00000066279.16	ASPM	protein_coding	281.826	3.79803	0.564163	6.73216	1.67167e-11	4.82335e-09	Up Regulated in Acute
ENSG00000067057.16	PFKP	protein_coding	601.808	1.37203	0.340406	4.03057	5.56413e-05	0.00158461	Up Regulated in Acute
ENSG00000067167.7	TRAM1	protein_coding	3167.49	0.818399	0.265826	3.07871	0.00207902	0.0266187	Up Regulated in Acute
ENSG00000067177.14	PHKA1	protein_coding	29.7156	4.0981	0.857589	4.77863	1.76491e-06	9.28907e-05	Up Regulated in Acute
ENSG00000067840.12	PDZD4	protein_coding	351.151	-1.9531	0.425758	-4.58735	4.48913e-06	0.00020318	Down Regulated in Acute
ENSG00000068028.17	RASSF1	protein_coding	2040.38	-0.995671	0.345438	-2.88234	0.0039473	0.042182	Down Regulated in Acute
ENSG00000068079.7	IFI35	protein_coding	2160.6	2.11516	0.391983	5.39605	6.81236e-08	5.88632e-06	Up Regulated in Acute
ENSG00000068137.14	PLEKHH3	protein_coding	14.5415	3.78229	1.10867	3.41155	0.000645957	0.0111391	Up Regulated in Acute
ENSG00000068383.18	INPP5A	protein_coding	201.58	-1.34281	0.36607	-3.66819	0.00024427	0.00520219	Down Regulated in Acute
ENSG00000068784.12	SRBD1	protein_coding	302.922	1.12296	0.389851	2.88048	0.00397075	0.0423494	Up Regulated in Acute
ENSG00000068912.13	ERLEC1	protein_coding	1553.74	1.65106	0.402364	4.10339	4.07143e-05	0.00122735	Up Regulated in Acute
ENSG00000069188.16	SDK2	protein_coding	43.5194	-1.8385	0.597109	-3.079	0.00207694	0.0266132	Down Regulated in Acute
ENSG00000069399.12	BCL3	protein_coding	585.908	-1.9417	0.329654	-5.89012	3.85906e-09	5.12051e-07	Down Regulated in Acute
ENSG00000069702.10	TGFBR3	protein_coding	630.541	-1.18508	0.360809	-3.2845	0.00102162	0.0159617	Down Regulated in Acute
ENSG00000070214.15	SLC44A1	protein_coding	1213.44	1.20391	0.343833	3.50143	0.000462764	0.00850665	Up Regulated in Acute
ENSG00000070731.9	ST6GALNAC2	protein_coding	103.53	-1.84174	0.414022	-4.4484	8.6511e-06	0.000355686	Down Regulated in Acute
ENSG00000070756.13	PABPC1	protein_coding	19076.5	-0.845498	0.263433	-3.20954	0.00132948	0.019458	Down Regulated in Acute
ENSG00000070961.14	ATP2B1	protein_coding	1627.86	-1.24483	0.332346	-3.74558	0.000179978	0.00406158	Down Regulated in Acute
ENSG00000071054.15	MAP4K4	protein_coding	2228.13	-0.90922	0.309889	-2.93401	0.00334608	0.0375667	Down Regulated in Acute
ENSG00000071073.12	MGAT4A	protein_coding	1352.47	-1.06231	0.323389	-3.28492	0.00102013	0.0159566	Down Regulated in Acute
ENSG00000071246.10	VASH1	protein_coding	426.646	-1.4697	0.350436	-4.19393	2.74168e-05	0.000893148	Down Regulated in Acute
ENSG00000071537.13	SEL1L	protein_coding	1922.23	1.13183	0.363601	3.11284	0.00185298	0.0246019	Up Regulated in Acute
ENSG00000071539.13	TRIP13	protein_coding	115.937	3.06592	0.719689	4.26006	2.04369e-05	0.000707108	Up Regulated in Acute
ENSG00000071967.11	CYBRD1	protein_coding	283.89	-2.44204	0.409104	-5.96924	2.38355e-09	3.49576e-07	Down Regulated in Acute
ENSG00000072071.16	ADGRL1	protein_coding	175.165	-1.47351	0.453677	-3.24792	0.0011625	0.0175877	Down Regulated in Acute
ENSG00000072571.19	HMMR	protein_coding	145.229	4.32821	0.568053	7.61937	2.54912e-14	1.93335e-11	Up Regulated in Acute
ENSG00000072694.18	FCGR2B	protein_coding	573.952	1.03421	0.303018	3.41303	0.000642447	0.0110904	Up Regulated in Acute
ENSG00000073792.15	IGF2BP2	protein_coding	134.961	-1.94373	0.437242	-4.44544	8.77132e-06	0.000359713	Down Regulated in Acute
ENSG00000073910.19	FRY	protein_coding	432.302	-1.23962	0.360304	-3.44048	0.000580683	0.0102686	Down Regulated in Acute
ENSG00000074695.5	LMAN1	protein_coding	2264	2.53468	0.387211	6.546	5.90985e-11	1.42524e-08	Up Regulated in Acute
ENSG00000074696.12	HACD3	protein_coding	387.441	1.09201	0.303391	3.59935	0.000319014	0.00638033	Up Regulated in Acute
ENSG00000074842.7	MYDGF	protein_coding	1761.11	2.06394	0.476141	4.33474	1.45936e-05	0.000540832	Up Regulated in Acute
ENSG00000074966.10	TXK	protein_coding	456.071	-1.26136	0.352146	-3.58193	0.000341065	0.00672727	Down Regulated in Acute
ENSG00000075131.9	TIPIN	protein_coding	108.434	1.30762	0.398888	3.27817	0.00104484	0.0162802	Up Regulated in Acute
ENSG00000075188.8	NUP37	protein_coding	422.47	1.08347	0.353102	3.06844	0.00215179	0.0273984	Up Regulated in Acute
ENSG00000075218.18	GTSE1	protein_coding	109.888	3.4555	0.570968	6.05199	1.43064e-09	2.31164e-07	Up Regulated in Acute
ENSG00000075239.13	ACAT1	protein_coding	635.226	1.20025	0.371761	3.22856	0.00124414	0.0185451	Up Regulated in Acute
ENSG00000075420.12	FNDC3B	protein_coding	836.735	1.28056	0.359126	3.56576	0.000362797	0.00699531	Up Regulated in Acute
ENSG00000075426.11	FOSL2	protein_coding	2663.37	-1.91477	0.36342	-5.26874	1.37365e-07	1.07224e-05	Down Regulated in Acute
ENSG00000075702.16	WDR62	protein_coding	71.7452	2.42382	0.599886	4.04047	5.33448e-05	0.00153371	Up Regulated in Acute
ENSG00000076242.14	MLH1	protein_coding	665.273	1.06377	0.370811	2.86875	0.00412094	0.0435488	Up Regulated in Acute
ENSG00000076382.16	SPAG5	protein_coding	399.019	1.59278	0.447556	3.55883	0.000372507	0.00714843	Up Regulated in Acute
ENSG00000076554.15	TPD52	protein_coding	560.717	1.51938	0.468205	3.24511	0.00117405	0.0177127	Up Regulated in Acute
ENSG00000077152.9	UBE2T	protein_coding	160.216	2.98117	0.62241	4.78973	1.6701e-06	8.8768e-05	Up Regulated in Acute
ENSG00000077238.13	IL4R	protein_coding	2366.38	-0.883201	0.287957	-3.06713	0.00216127	0.0274975	Down Regulated in Acute
ENSG00000077327.15	SPAG6	protein_coding	17.5347	4.97213	1.06163	4.68348	2.82044e-06	0.000136855	Up Regulated in Acute
ENSG00000077684.15	JADE1	protein_coding	723.262	-0.976699	0.312181	-3.12863	0.00175623	0.0237864	Down Regulated in Acute
ENSG00000077943.7	ITGA8	protein_coding	12.7514	5.5334	1.3984	3.95695	7.59115e-05	0.00203413	Up Regulated in Acute
ENSG00000077984.5	CST7	protein_coding	1363.12	-0.968769	0.322793	-3.0012	0.00268914	0.0322098	Down Regulated in Acute
ENSG00000078081.7	LAMP3	protein_coding	112.04	3.40118	0.769934	4.4175	9.98508e-06	0.00039641	Up Regulated in Acute
ENSG00000078687.16	TNRC6C	protein_coding	533.4	-1.61921	0.381947	-4.23936	2.24163e-05	0.000753019	Down Regulated in Acute
ENSG00000078900.14	TP73	protein_coding	34.7525	2.72541	0.848443	3.21224	0.00131703	0.0193283	Up Regulated in Acute
ENSG00000079150.17	FKBP7	protein_coding	26.7401	2.20962	0.742543	2.97574	0.00292281	0.0340005	Up Regulated in Acute
ENSG00000079263.18	SP140	protein_coding	1445.82	1.27502	0.261807	4.87007	1.1156e-06	6.22728e-05	Up Regulated in Acute
ENSG00000079785.14	DDX1	protein_coding	1141.64	0.891429	0.31218	2.8555	0.0042969	0.044938	Up Regulated in Acute
ENSG00000079931.14	MOXD1	protein_coding	109.219	3.36591	0.604046	5.57228	2.51434e-08	2.55514e-06	Up Regulated in Acute
ENSG00000079999.13	KEAP1	protein_coding	452.466	1.22588	0.297552	4.11987	3.7908e-05	0.00116007	Up Regulated in Acute
ENSG00000080986.12	NDC80	protein_coding	295.386	2.42806	0.364075	6.6691	2.57369e-11	7.16996e-09	Up Regulated in Acute
ENSG00000081052.11	COL4A4	protein_coding	155.763	1.47854	0.38368	3.85358	0.000116403	0.00284114	Up Regulated in Acute
ENSG00000081059.19	TCF7	protein_coding	3213.83	-1.80134	0.315473	-5.70997	1.12999e-08	1.29492e-06	Down Regulated in Acute
ENSG00000081177.18	EXD2	protein_coding	117.443	1.70376	0.574637	2.96494	0.00302746	0.0349912	Up Regulated in Acute
ENSG00000081665.13	ZNF506	protein_coding	344.544	-1.0842	0.359741	-3.01383	0.00257976	0.0312134	Down Regulated in Acute
ENSG00000081870.11	HSPB11	protein_coding	588.172	0.991152	0.299961	3.30427	0.000952226	0.0150992	Up Regulated in Acute
ENSG00000081913.13	PHLPP1	protein_coding	73.2687	-1.69266	0.436938	-3.87391	0.000107101	0.0026542	Down Regulated in Acute
ENSG00000082014.16	SMARCD3	protein_coding	776.257	-0.861775	0.261971	-3.28958	0.00100339	0.0157405	Down Regulated in Acute
ENSG00000082212.11	ME2	protein_coding	1217.26	1.07556	0.293847	3.66028	0.000251942	0.00534236	Up Regulated in Acute
ENSG00000082438.15	COBLL1	protein_coding	363.343	1.74355	0.418148	4.16971	3.04993e-05	0.000964399	Up Regulated in Acute
ENSG00000082512.14	TRAF5	protein_coding	1081.19	-1.04071	0.306504	-3.39541	0.000685263	0.0117045	Down Regulated in Acute
ENSG00000082515.16	MRPL22	protein_coding	495.427	1.17694	0.342762	3.43371	0.000595374	0.0104794	Up Regulated in Acute
ENSG00000083720.12	OXCT1	protein_coding	726.401	1.01001	0.321188	3.14459	0.00166318	0.0229297	Up Regulated in Acute
ENSG00000083844.10	ZNF264	protein_coding	373.873	-1.07852	0.337451	-3.19609	0.00139305	0.0201331	Down Regulated in Acute
ENSG00000084070.11	SMAP2	protein_coding	6443.2	-0.90167	0.280636	-3.21296	0.00131377	0.019298	Down Regulated in Acute
ENSG00000085063.14	CD59	protein_coding	1076.72	1.61188	0.413629	3.89693	9.7421e-05	0.00248678	Up Regulated in Acute
ENSG00000085840.12	ORC1	protein_coding	143.776	3.77157	0.515263	7.31969	2.48537e-13	1.43423e-10	Up Regulated in Acute
ENSG00000085999.11	RAD54L	protein_coding	82.7919	2.85917	0.65442	4.36901	1.24809e-05	0.000472285	Up Regulated in Acute
ENSG00000086061.15	DNAJA1	protein_coding	2277.15	0.919569	0.241392	3.80945	0.000139279	0.00330464	Up Regulated in Acute
ENSG00000086065.13	CHMP5	protein_coding	1075.21	1.44591	0.365928	3.95136	7.77077e-05	0.0020667	Up Regulated in Acute
ENSG00000086827.8	ZW10	protein_coding	252.675	1.19877	0.380222	3.15281	0.00161707	0.0224087	Up Regulated in Acute
ENSG00000087077.11	TRIP6	protein_coding	157.436	1.35846	0.350918	3.87117	0.000108316	0.00268019	Up Regulated in Acute
ENSG00000087095.12	NLK	protein_coding	315.399	0.96415	0.303277	3.1791	0.00147731	0.0209022	Up Regulated in Acute
ENSG00000087116.13	ADAMTS2	protein_coding	24.0156	4.46782	1.0646	4.19672	2.70805e-05	0.000883974	Up Regulated in Acute
ENSG00000087258.13	GNAO1	protein_coding	34.4732	-2.40592	0.675683	-3.56072	0.000369836	0.00710561	Down Regulated in Acute
ENSG00000087502.17	ERGIC2	protein_coding	562.702	1.56362	0.315032	4.96336	6.92824e-07	4.10061e-05	Up Regulated in Acute
ENSG00000087586.17	AURKA	protein_coding	183.755	2.92703	0.49674	5.89247	3.80473e-09	5.12051e-07	Up Regulated in Acute
ENSG00000087842.10	PIR	protein_coding	9.00327	3.30412	1.15098	2.8707	0.00409567	0.0433669	Up Regulated in Acute
ENSG00000087903.12	RFX2	protein_coding	135.791	-1.90833	0.617854	-3.08864	0.00201074	0.0260177	Down Regulated in Acute
ENSG00000087995.15	METTL2A	protein_coding	154.424	1.55854	0.374792	4.15841	3.20476e-05	0.00100354	Up Regulated in Acute
ENSG00000088325.15	TPX2	protein_coding	374.1	3.1285	0.506633	6.17508	6.61281e-10	1.2142e-07	Up Regulated in Acute
ENSG00000088682.13	COQ9	protein_coding	440.751	1.08272	0.358914	3.01667	0.0025557	0.0310488	Up Regulated in Acute
ENSG00000088827.12	SIGLEC1	protein_coding	3508.62	3.5059	0.964023	3.63674	0.000276112	0.00577157	Up Regulated in Acute
ENSG00000088836.12	SLC4A11	protein_coding	12.0552	3.83098	1.21212	3.16056	0.00157466	0.021915	Up Regulated in Acute
ENSG00000088854.12	C20orf194	protein_coding	236.228	-1.10952	0.394174	-2.81481	0.00488067	0.0491478	Down Regulated in Acute
ENSG00000088986.10	DYNLL1	protein_coding	1787.55	1.1123	0.36032	3.08698	0.002022	0.0260954	Up Regulated in Acute
ENSG00000088992.17	TESC	protein_coding	320.052	-1.20332	0.334099	-3.60167	0.000316183	0.00635434	Down Regulated in Acute
ENSG00000089094.16	KDM2B	protein_coding	943.592	-0.913251	0.312404	-2.9233	0.00346345	0.0385151	Down Regulated in Acute
ENSG00000089127.12	OAS1	protein_coding	4958.78	2.06961	0.323903	6.3896	1.66321e-10	3.58322e-08	Up Regulated in Acute
ENSG00000089169.14	RPH3A	protein_coding	126.015	-3.76589	0.546756	-6.88769	5.67056e-12	1.79657e-09	Down Regulated in Acute
ENSG00000089685.14	BIRC5	protein_coding	275.156	2.7956	0.613663	4.5556	5.22373e-06	0.000229362	Up Regulated in Acute
ENSG00000089692.8	LAG3	protein_coding	492.405	1.54621	0.494707	3.1255	0.00177501	0.023936	Up Regulated in Acute
ENSG00000090054.13	SPTLC1	protein_coding	506.28	1.1839	0.393576	3.00806	0.0026292	0.0317035	Up Regulated in Acute
ENSG00000090238.11	YPEL3	protein_coding	1388.94	-1.47252	0.375318	-3.9234	8.73085e-05	0.00227905	Down Regulated in Acute
ENSG00000090447.11	TFAP4	protein_coding	110.099	-1.25003	0.433327	-2.88472	0.00391766	0.0420389	Down Regulated in Acute
ENSG00000090520.10	DNAJB11	protein_coding	2393.69	1.48161	0.422042	3.51057	0.00044714	0.00827592	Up Regulated in Acute
ENSG00000090565.15	RAB11FIP3	protein_coding	231.918	-0.970371	0.343012	-2.82897	0.00466977	0.0476955	Down Regulated in Acute
ENSG00000090861.15	AARS	protein_coding	1457.2	1.60657	0.352808	4.55367	5.27187e-06	0.000230623	Up Regulated in Acute
ENSG00000090889.11	KIF4A	protein_coding	117.783	4.31664	0.616866	6.9977	2.60203e-12	9.34304e-10	Up Regulated in Acute
ENSG00000090975.12	PITPNM2	protein_coding	155.996	-1.26778	0.376802	-3.36459	0.000766579	0.0128356	Down Regulated in Acute
ENSG00000091409.14	ITGA6	protein_coding	750.598	-1.02129	0.323897	-3.15313	0.00161531	0.0224079	Down Regulated in Acute
ENSG00000091436.16	pk	protein_coding	246.554	-1.0764	0.336094	-3.20267	0.00136158	0.0198381	Down Regulated in Acute
ENSG00000091490.10	SEL1L3	protein_coding	4543.64	1.95628	0.40883	4.78508	1.70923e-06	9.05499e-05	Up Regulated in Acute
ENSG00000091651.8	ORC6	protein_coding	108.182	1.62563	0.458766	3.54349	0.000394875	0.00750633	Up Regulated in Acute
ENSG00000091831.21	ESR1	protein_coding	54.3093	3.08472	0.655351	4.70697	2.51423e-06	0.000125386	Up Regulated in Acute
ENSG00000092051.16	JPH4	protein_coding	59.4654	2.96151	0.743718	3.98204	6.8326e-05	0.00187121	Up Regulated in Acute
ENSG00000092470.11	WDR76	protein_coding	214.7	2.00746	0.448119	4.47975	7.47311e-06	0.000313638	Up Regulated in Acute
ENSG00000092621.11	PHGDH	protein_coding	194.358	2.04399	0.481507	4.24499	2.18604e-05	0.000743484	Up Regulated in Acute
ENSG00000092758.15	COL9A3	protein_coding	48.3875	3.10876	0.836444	3.71663	0.000201895	0.00446879	Up Regulated in Acute
ENSG00000092853.13	CLSPN	protein_coding	134.552	3.76245	0.530897	7.08698	1.37069e-12	5.98582e-10	Up Regulated in Acute
ENSG00000093009.9	CDC45	protein_coding	171.02	3.61396	0.593289	6.09139	1.11932e-09	1.90379e-07	Up Regulated in Acute
ENSG00000094804.9	CDC6	protein_coding	277.903	4.27619	0.646567	6.61368	3.74879e-11	9.76984e-09	Up Regulated in Acute
ENSG00000095585.16	BLNK	protein_coding	532.782	1.67531	0.293659	5.70495	1.16378e-08	1.31499e-06	Up Regulated in Acute
ENSG00000096080.11	MRPS18A	protein_coding	519.168	1.21672	0.30066	4.04681	5.19195e-05	0.00149806	Up Regulated in Acute
ENSG00000096092.5	TMEM14A	protein_coding	80.126	1.73547	0.549012	3.16109	0.00157181	0.0218942	Up Regulated in Acute
ENSG00000099194.5	SCD	protein_coding	199.211	2.0644	0.548719	3.76221	0.00016842	0.00390435	Up Regulated in Acute
ENSG00000099204.18	ABLIM1	protein_coding	1663	-1.57425	0.265319	-5.93341	2.96708e-09	4.16888e-07	Down Regulated in Acute
ENSG00000099308.10	MAST3	protein_coding	1168.65	-0.997416	0.340281	-2.93115	0.00337707	0.037841	Down Regulated in Acute
ENSG00000099377.13	HSD3B7	protein_coding	31.0325	3.0905	0.876599	3.52555	0.000422597	0.0079307	Up Regulated in Acute
ENSG00000099622.13	CIRBP	protein_coding	4273.9	-0.729296	0.258614	-2.82001	0.00480216	0.0486245	Down Regulated in Acute
ENSG00000099860.8	GADD45B	protein_coding	858.012	-1.01087	0.287131	-3.5206	0.000430572	0.00802443	Down Regulated in Acute
ENSG00000099889.13	ARVCF	protein_coding	23.8438	-2.16058	0.769703	-2.80703	0.00499999	0.0499628	Down Regulated in Acute
ENSG00000099956.17	SMARCB1	protein_coding	983.059	0.993846	0.311955	3.18587	0.00144322	0.0205516	Up Regulated in Acute
ENSG00000099958.14	DERL3	protein_coding	913.903	2.57612	0.458744	5.6156	1.95884e-08	2.07143e-06	Up Regulated in Acute
ENSG00000099995.18	SF3A1	protein_coding	1987.58	-0.781472	0.261603	-2.98725	0.00281504	0.0332253	Down Regulated in Acute
ENSG00000100003.17	SEC14L2	protein_coding	45.4067	-2.82756	0.863715	-3.27372	0.00106142	0.0164592	Down Regulated in Acute
ENSG00000100027.14	YPEL1	protein_coding	248.36	-1.55782	0.319764	-4.87178	1.10598e-06	6.20503e-05	Down Regulated in Acute
ENSG00000100034.13	PPM1F	protein_coding	1387.08	-1.17362	0.324823	-3.61311	0.000302552	0.00618031	Down Regulated in Acute
ENSG00000100079.6	LGALS2	protein_coding	1824.07	-1.10978	0.363545	-3.05267	0.00226814	0.0285648	Down Regulated in Acute
ENSG00000100100.12	PIK3IP1	protein_coding	2500.06	-1.39224	0.337384	-4.12658	3.6819e-05	0.00113319	Down Regulated in Acute
ENSG00000100105.17	PATZ1	protein_coding	472.178	-0.977756	0.306705	-3.18794	0.00143292	0.0204865	Down Regulated in Acute
ENSG00000100162.14	CENPM	protein_coding	78.2989	2.43916	0.802604	3.03906	0.00237319	0.0295196	Up Regulated in Acute
ENSG00000100206.9	DMC1	protein_coding	17.1171	4.86134	1.1686	4.15998	3.1827e-05	0.000998564	Up Regulated in Acute
ENSG00000100219.16	XBP1	protein_coding	7845.18	2.38116	0.431718	5.51554	3.47709e-08	3.40502e-06	Up Regulated in Acute
ENSG00000100220.11	RTCB	protein_coding	1611.52	0.716912	0.242004	2.9624	0.0030525	0.0352051	Up Regulated in Acute
ENSG00000100242.15	SUN2	protein_coding	4247.6	-0.765426	0.269944	-2.8355	0.00457546	0.0470583	Down Regulated in Acute
ENSG00000100263.13	RHBDD3	protein_coding	122.636	1.18582	0.38739	3.06104	0.00220568	0.0279838	Up Regulated in Acute
ENSG00000100290.2	BIK	protein_coding	39.1077	2.36877	0.773338	3.06305	0.00219093	0.027831	Up Regulated in Acute
ENSG00000100298.15	APOBEC3H	protein_coding	180.171	2.16883	0.43305	5.00826	5.49256e-07	3.42659e-05	Up Regulated in Acute
ENSG00000100307.12	CBX7	protein_coding	860.27	-1.34596	0.301484	-4.46445	8.02761e-06	0.000334304	Down Regulated in Acute
ENSG00000100336.17	APOL4	protein_coding	67.1589	3.27596	0.839989	3.9	9.61924e-05	0.0024593	Up Regulated in Acute
ENSG00000100342.20	APOL1	protein_coding	884.67	1.38754	0.313721	4.42286	9.74043e-06	0.000388607	Up Regulated in Acute
ENSG00000100346.17	CACNA1I	protein_coding	253.918	-1.34239	0.421444	-3.18523	0.0014464	0.0205731	Down Regulated in Acute
ENSG00000100425.18	BRD1	protein_coding	448.509	-0.833007	0.290082	-2.87163	0.00408362	0.0432961	Down Regulated in Acute
ENSG00000100462.15	PRMT5	protein_coding	648.523	0.945702	0.295584	3.19944	0.00137695	0.0199541	Up Regulated in Acute
ENSG00000100479.12	POLE2	protein_coding	72.7194	3.32115	0.706521	4.7007	2.59265e-06	0.00012772	Up Regulated in Acute
ENSG00000100526.19	CDKN3	protein_coding	129.345	3.24801	0.75127	4.32336	1.53673e-05	0.000561776	Up Regulated in Acute
ENSG00000100554.11	ATP6V1D	protein_coding	597.151	1.01612	0.323986	3.1363	0.00171093	0.0233662	Up Regulated in Acute
ENSG00000100567.12	PSMA3	protein_coding	1802.75	1.04159	0.330893	3.14781	0.00164501	0.0227181	Up Regulated in Acute
ENSG00000100599.15	RIN3	protein_coding	1644.2	-1.1357	0.34818	-3.26183	0.00110697	0.0169059	Down Regulated in Acute
ENSG00000100600.14	LGMN	protein_coding	276.248	1.17388	0.352797	3.32736	0.000876719	0.0142086	Up Regulated in Acute
ENSG00000100629.16	CEP128	protein_coding	258.951	2.68581	0.625898	4.29113	1.77768e-05	0.000628527	Up Regulated in Acute
ENSG00000100714.15	MTHFD1	protein_coding	809.383	1.05431	0.294028	3.58576	0.000336104	0.00664721	Up Regulated in Acute
ENSG00000100883.11	SRP54	protein_coding	1161.97	1.32665	0.323941	4.09534	4.21552e-05	0.00126607	Up Regulated in Acute
ENSG00000100911.13	PSME2	protein_coding	6813.68	1.04163	0.280634	3.71172	0.00020586	0.0045194	Up Regulated in Acute
ENSG00000101003.9	GINS1	protein_coding	71.4763	2.97401	0.576848	5.15563	2.5278e-07	1.8153e-05	Up Regulated in Acute
ENSG00000101057.15	MYBL2	protein_coding	775.276	3.65636	0.613663	5.95826	2.54935e-09	3.64534e-07	Up Regulated in Acute
ENSG00000101187.15	SLCO4A1	protein_coding	45.3138	2.08646	0.741891	2.81235	0.00491813	0.0493892	Up Regulated in Acute
ENSG00000101194.17	SLC17A9	protein_coding	417.769	1.45912	0.357739	4.07874	4.5281e-05	0.00134248	Up Regulated in Acute
ENSG00000101294.16	HM13	protein_coding	2710.4	0.938403	0.271218	3.45995	0.000540267	0.00968883	Up Regulated in Acute
ENSG00000101310.14	SEC23B	protein_coding	1238.28	1.06776	0.2712	3.93717	8.24484e-05	0.00216971	Up Regulated in Acute
ENSG00000101335.9	MYL9	protein_coding	92.4143	1.82739	0.574616	3.1802	0.00147172	0.0208414	Up Regulated in Acute
ENSG00000101412.12	E2F1	protein_coding	154.188	2.17887	0.517727	4.20853	2.5704e-05	0.000845876	Up Regulated in Acute
ENSG00000101439.8	CST3	protein_coding	8097.29	-1.00758	0.320994	-3.13893	0.00169567	0.0232982	Down Regulated in Acute
ENSG00000101447.13	FAM83D	protein_coding	37.0393	2.23905	0.678345	3.30075	0.000964276	0.0152305	Up Regulated in Acute
ENSG00000101464.10	PIGU	protein_coding	224.924	0.94842	0.336812	2.81588	0.00486442	0.0490762	Up Regulated in Acute
ENSG00000101695.8	RNF125	protein_coding	730.214	-1.25775	0.341342	-3.68472	0.000228952	0.00494959	Down Regulated in Acute
ENSG00000101773.16	RBBP8	protein_coding	468.923	1.11846	0.362108	3.08874	0.00201006	0.0260177	Up Regulated in Acute
ENSG00000101811.13	CSTF2	protein_coding	251.225	0.960812	0.313894	3.06094	0.00220642	0.0279838	Up Regulated in Acute
ENSG00000101846.6	STS	protein_coding	227.022	-1.16402	0.388582	-2.99557	0.00273935	0.0326178	Down Regulated in Acute
ENSG00000101868.10	POLA1	protein_coding	217.572	1.04771	0.350867	2.98605	0.0028261	0.0333251	Up Regulated in Acute
ENSG00000102096.9	PIM2	protein_coding	4819.57	1.40291	0.327026	4.2899	1.7875e-05	0.00063062	Up Regulated in Acute
ENSG00000102401.19	ARMCX3	protein_coding	553.545	1.22255	0.326319	3.74649	0.000179329	0.00405258	Up Regulated in Acute
ENSG00000102445.18	KIAA0226L	protein_coding	595.542	-0.884472	0.292649	-3.02229	0.00250869	0.030732	Down Regulated in Acute
ENSG00000102531.16	FNDC3A	protein_coding	904.384	1.5559	0.518168	3.0027	0.00267596	0.0320996	Up Regulated in Acute
ENSG00000102738.7	MRPS31	protein_coding	500.153	1.53015	0.381228	4.01374	5.97654e-05	0.00167654	Up Regulated in Acute
ENSG00000102760.12	RGCC	protein_coding	368.189	-1.42812	0.325577	-4.38643	1.15226e-05	0.000443292	Down Regulated in Acute
ENSG00000102794.9	IRG1	protein_coding	10.9539	5.17299	1.42303	3.6352	0.000277762	0.00579855	Up Regulated in Acute
ENSG00000102870.5	ZNF629	protein_coding	117.669	-1.46377	0.437425	-3.34635	0.000818841	0.0134734	Down Regulated in Acute
ENSG00000103226.17	NOMO3	protein_coding	96.6668	1.8593	0.609751	3.04927	0.00229396	0.0287554	Up Regulated in Acute
ENSG00000103257.8	SLC7A5	protein_coding	343.934	1.4722	0.412457	3.56935	0.000357864	0.00694996	Up Regulated in Acute
ENSG00000103356.15	EARS2	protein_coding	225.917	1.26475	0.368886	3.42856	0.000606788	0.010588	Up Regulated in Acute
ENSG00000103528.16	SYT17	protein_coding	44.375	-3.29957	0.587714	-5.61424	1.97425e-08	2.07143e-06	Down Regulated in Acute
ENSG00000103966.9	EHD4	protein_coding	644.309	0.895552	0.29795	3.00571	0.00264963	0.0318719	Up Regulated in Acute
ENSG00000104147.8	OIP5	protein_coding	45.8617	4.36757	0.809695	5.39409	6.88702e-08	5.91917e-06	Up Regulated in Acute
ENSG00000104412.7	EMC2	protein_coding	374.749	1.59851	0.560658	2.85113	0.00435647	0.0455021	Up Regulated in Acute
ENSG00000104490.17	NCALD	protein_coding	248.042	-1.32093	0.412131	-3.20512	0.00135005	0.0197056	Down Regulated in Acute
ENSG00000104524.13	PYCRL	protein_coding	42.5409	2.00358	0.628031	3.19025	0.00142151	0.020453	Up Regulated in Acute
ENSG00000104626.14	ERI1	protein_coding	292.654	1.18436	0.397165	2.98205	0.00286327	0.0335494	Up Regulated in Acute
ENSG00000104635.13	SLC39A14	protein_coding	157.275	1.8313	0.546207	3.35276	0.000800087	0.0132457	Up Regulated in Acute
ENSG00000104691.14	UBXN8	protein_coding	148.702	1.35378	0.359871	3.76184	0.000168665	0.00390443	Up Regulated in Acute
ENSG00000104738.16	MCM4	protein_coding	627.585	1.89511	0.415325	4.56296	5.04386e-06	0.000224514	Up Regulated in Acute
ENSG00000104870.12	FCGRT	protein_coding	2611.36	-1.08954	0.320785	-3.39649	0.000682566	0.0116832	Down Regulated in Acute
ENSG00000104881.14	PPP1R13L	protein_coding	37.317	-1.99127	0.582839	-3.4165	0.000634312	0.0109852	Down Regulated in Acute
ENSG00000104894.11	CD37	protein_coding	4492.04	-0.858699	0.286971	-2.99229	0.00276894	0.0328733	Down Regulated in Acute
ENSG00000104980.7	TIMM44	protein_coding	296.763	0.980822	0.309663	3.16738	0.00153817	0.0214997	Up Regulated in Acute
ENSG00000105011.8	ASF1B	protein_coding	246.138	1.70071	0.563225	3.0196	0.00253109	0.0308699	Up Regulated in Acute
ENSG00000105048.16	TNNT1	protein_coding	172.699	2.8443	0.473045	6.01275	1.82401e-09	2.88945e-07	Up Regulated in Acute
ENSG00000105173.13	CCNE1	protein_coding	147.77	1.38601	0.447836	3.09491	0.00196873	0.0256709	Up Regulated in Acute
ENSG00000105373.18	GLTSCR2	protein_coding	4240.2	-1.28723	0.414427	-3.10605	0.00189602	0.0249478	Down Regulated in Acute
ENSG00000105514.7	RAB3D	protein_coding	1199.13	-1.12431	0.339502	-3.31165	0.00092746	0.0148082	Down Regulated in Acute
ENSG00000105516.10	DBP	protein_coding	147.039	-1.54796	0.493711	-3.13536	0.00171646	0.0233663	Down Regulated in Acute
ENSG00000105520.10	LPPR2	protein_coding	451.539	-1.55719	0.368153	-4.22973	2.33969e-05	0.00077948	Down Regulated in Acute
ENSG00000105612.8	DNASE2	protein_coding	1075.13	0.915096	0.274026	3.33946	0.000839428	0.0136867	Up Regulated in Acute
ENSG00000105643.9	ARRDC2	protein_coding	2049.32	-1.3174	0.312983	-4.20919	2.56289e-05	0.000845126	Down Regulated in Acute
ENSG00000105676.13	ARMC6	protein_coding	244.382	0.997973	0.331146	3.0137	0.00258083	0.0312134	Up Regulated in Acute
ENSG00000105698.15	USF2	protein_coding	1489.92	-0.802866	0.258341	-3.10777	0.00188504	0.0248569	Down Regulated in Acute
ENSG00000105708.8	ZNF14	protein_coding	174.547	-1.20853	0.369324	-3.27227	0.00106687	0.016512	Down Regulated in Acute
ENSG00000105808.17	RASA4	protein_coding	86.7621	-2.2267	0.593436	-3.75221	0.000175281	0.00400592	Down Regulated in Acute
ENSG00000105829.11	BET1	protein_coding	354.333	1.16878	0.346683	3.37134	0.000748045	0.0125774	Up Regulated in Acute
ENSG00000105851.10	PIK3CG	protein_coding	560.161	0.91864	0.318083	2.88805	0.00387641	0.0417737	Up Regulated in Acute
ENSG00000105854.12	PON2	protein_coding	223.003	-0.956083	0.329284	-2.90352	0.00368991	0.0401643	Down Regulated in Acute
ENSG00000105875.13	WDR91	protein_coding	546.208	-0.838129	0.280744	-2.98538	0.00283224	0.0333309	Down Regulated in Acute
ENSG00000105967.15	TFEC	protein_coding	947.79	1.67901	0.503251	3.33634	0.000848906	0.0137994	Up Regulated in Acute
ENSG00000105974.11	CAV1	protein_coding	140.092	4.73685	0.652436	7.26025	3.86381e-13	1.95098e-10	Up Regulated in Acute
ENSG00000105976.14	MET	protein_coding	23.5262	4.75193	1.18849	3.99828	6.38056e-05	0.00177143	Up Regulated in Acute
ENSG00000106003.12	LFNG	protein_coding	1530.3	-1.13644	0.379087	-2.99784	0.00271896	0.0324727	Down Regulated in Acute
ENSG00000106066.13	CPVL	protein_coding	4490.67	-0.844111	0.26103	-3.23376	0.0012217	0.0182611	Down Regulated in Acute
ENSG00000106080.10	FKBP14	protein_coding	172.848	1.70028	0.428318	3.96967	7.19728e-05	0.00194797	Up Regulated in Acute
ENSG00000106105.13	GARS	protein_coding	1562.21	0.997786	0.340095	2.93384	0.00334794	0.0375667	Up Regulated in Acute
ENSG00000106123.11	EPHB6	protein_coding	336.556	-1.35571	0.383973	-3.53075	0.000414382	0.00783108	Down Regulated in Acute
ENSG00000106367.13	AP1S1	protein_coding	235.444	1.5983	0.560983	2.84912	0.0043841	0.0457317	Up Regulated in Acute
ENSG00000106392.10	C1GALT1	protein_coding	814.497	1.40961	0.380633	3.70332	0.000212795	0.00464014	Up Regulated in Acute
ENSG00000106415.12	GLCCI1	protein_coding	695.656	1.15926	0.354598	3.26923	0.00107839	0.0166425	Up Regulated in Acute
ENSG00000106462.10	EZH2	protein_coding	726.178	1.34628	0.274044	4.91265	8.98535e-07	5.20378e-05	Up Regulated in Acute
ENSG00000106565.17	TMEM176B	protein_coding	1327.08	-1.08182	0.288128	-3.75466	0.000173577	0.00398389	Down Regulated in Acute
ENSG00000106991.13	ENG	protein_coding	429.145	-1.35267	0.360146	-3.75589	0.00017273	0.00397008	Down Regulated in Acute
ENSG00000107341.4	UBE2R2	protein_coding	1724.02	-0.945096	0.263007	-3.59343	0.000326351	0.00647015	Down Regulated in Acute
ENSG00000107485.15	GATA3	protein_coding	950.404	-1.72521	0.536176	-3.21763	0.00129256	0.0190385	Down Regulated in Acute
ENSG00000107611.14	CUBN	protein_coding	152.068	-1.33212	0.417782	-3.18856	0.00142986	0.0204819	Down Regulated in Acute
ENSG00000107742.12	SPOCK2	protein_coding	3136.88	-1.29452	0.35759	-3.62012	0.00029447	0.0060458	Down Regulated in Acute
ENSG00000107771.15	CCSER2	protein_coding	710.121	-1.05381	0.293014	-3.59645	0.000322584	0.00642561	Down Regulated in Acute
ENSG00000107954.10	NEURL1	protein_coding	87.3281	-1.50538	0.526789	-2.85766	0.00426782	0.0447789	Down Regulated in Acute
ENSG00000108106.13	UBE2S	protein_coding	217.242	1.79695	0.350401	5.12826	2.92428e-07	2.01925e-05	Up Regulated in Acute
ENSG00000108179.13	PPIF	protein_coding	1936.57	-1.02921	0.34447	-2.9878	0.00280992	0.0331891	Down Regulated in Acute
ENSG00000108306.11	FBXL20	protein_coding	532.779	-0.992808	0.352434	-2.817	0.00484742	0.0489529	Down Regulated in Acute
ENSG00000108370.15	RGS9	protein_coding	109.235	-1.69933	0.598817	-2.83781	0.00454244	0.0468228	Down Regulated in Acute
ENSG00000108588.13	CCDC47	protein_coding	713.129	0.99484	0.342184	2.90732	0.00364534	0.0398521	Up Regulated in Acute
ENSG00000108641.14	B9D1	protein_coding	51.7071	3.305	0.802648	4.11763	3.82797e-05	0.00116923	Up Regulated in Acute
ENSG00000108679.12	LGALS3BP	protein_coding	1246.22	2.97774	0.555123	5.36411	8.13478e-08	6.84593e-06	Up Regulated in Acute
ENSG00000108826.15	MRPL27	protein_coding	662.808	1.03727	0.359202	2.88771	0.00388058	0.0417737	Up Regulated in Acute
ENSG00000108829.9	LRRC59	protein_coding	1410.65	1.35941	0.336848	4.03567	5.44469e-05	0.00156262	Up Regulated in Acute
ENSG00000108950.11	FAM20A	protein_coding	94.7873	3.12806	0.641819	4.87374	1.09506e-06	6.16513e-05	Up Regulated in Acute
ENSG00000109046.14	WSB1	protein_coding	4128.54	1.08369	0.341053	3.17749	0.00148555	0.0210004	Up Regulated in Acute
ENSG00000109099.13	PMP22	protein_coding	14.5344	-3.95835	1.31668	-3.00632	0.00264429	0.0318379	Down Regulated in Acute
ENSG00000109107.13	ALDOC	protein_coding	324.623	-1.24883	0.424646	-2.94087	0.00327287	0.037007	Down Regulated in Acute
ENSG00000109323.8	MANBA	protein_coding	1597.9	-0.730206	0.251697	-2.90113	0.00371824	0.0404031	Down Regulated in Acute
ENSG00000109452.12	INPP4B	protein_coding	414.623	-1.09754	0.326656	-3.35994	0.000779596	0.0129729	Down Regulated in Acute
ENSG00000109475.16	RPL34	protein_coding	21848.1	-1.17102	0.40557	-2.88736	0.00388492	0.0417927	Down Regulated in Acute
ENSG00000109674.3	NEIL3	protein_coding	20.2268	4.37259	1.18674	3.68452	0.000229131	0.00494959	Up Regulated in Acute
ENSG00000109805.9	NCAPG	protein_coding	350.467	3.43242	0.607936	5.64603	1.642e-08	1.76876e-06	Up Regulated in Acute
ENSG00000109814.11	UGDH	protein_coding	168.944	1.82061	0.475649	3.82764	0.00012938	0.00311553	Up Regulated in Acute
ENSG00000109906.13	ZBTB16	protein_coding	58.752	-1.62437	0.570525	-2.84714	0.00441139	0.0458978	Down Regulated in Acute
ENSG00000109956.12	B3GAT1	protein_coding	211.263	-2.25304	0.604561	-3.72673	0.000193981	0.00431728	Down Regulated in Acute
ENSG00000110042.7	DTX4	protein_coding	165.711	-1.22523	0.358083	-3.42165	0.000622427	0.0108258	Down Regulated in Acute
ENSG00000110063.8	DCPS	protein_coding	622.574	2.03235	0.39753	5.11243	3.18038e-07	2.15918e-05	Up Regulated in Acute
ENSG00000110079.16	MS4A4A	protein_coding	411.623	2.06515	0.602127	3.42976	0.000604105	0.010588	Up Regulated in Acute
ENSG00000110318.13	CEP126	protein_coding	75.7206	-1.90432	0.523914	-3.63479	0.000278204	0.00580028	Down Regulated in Acute
ENSG00000110324.9	IL10RA	protein_coding	8825.96	-1.02973	0.28438	-3.62097	0.000293498	0.00603352	Down Regulated in Acute
ENSG00000110400.10	PVRL1	protein_coding	108.064	-2.20663	0.560554	-3.93652	8.26702e-05	0.00217201	Down Regulated in Acute
ENSG00000110435.11	PDHX	protein_coding	305.007	1.07173	0.368716	2.90665	0.00365317	0.0399106	Up Regulated in Acute
ENSG00000110448.10	CD5	protein_coding	1547.06	-1.21266	0.365657	-3.31638	0.000911914	0.0146614	Down Regulated in Acute
ENSG00000110660.14	SLC35F2	protein_coding	195.09	2.05657	0.412801	4.982	6.29311e-07	3.82271e-05	Up Regulated in Acute
ENSG00000110756.17	HPS5	protein_coding	495.234	1.48054	0.377883	3.91799	8.92886e-05	0.00232233	Up Regulated in Acute
ENSG00000110777.11	POU2AF1	protein_coding	2382.98	2.02302	0.431855	4.68448	2.80666e-06	0.000136597	Up Regulated in Acute
ENSG00000110871.14	COQ5	protein_coding	470.807	1.16227	0.340075	3.4177	0.000631531	0.0109488	Up Regulated in Acute
ENSG00000110888.17	CAPRIN2	protein_coding	699.617	-0.977846	0.320728	-3.04884	0.00229728	0.0287748	Down Regulated in Acute
ENSG00000110917.7	MLEC	protein_coding	2082.62	1.1711	0.295046	3.9692	7.2115e-05	0.00194855	Up Regulated in Acute
ENSG00000111110.11	PPM1H	protein_coding	45.5905	-1.9458	0.535605	-3.6329	0.000280258	0.00583557	Down Regulated in Acute
ENSG00000111181.12	SLC6A12	protein_coding	121.08	1.38736	0.488711	2.83882	0.00452802	0.04675	Up Regulated in Acute
ENSG00000111186.12	WNT5B	protein_coding	44.0955	2.06731	0.652361	3.16896	0.00152984	0.0214949	Up Regulated in Acute
ENSG00000111206.12	FOXM1	protein_coding	263.269	3.51439	0.645338	5.44582	5.15664e-08	4.81624e-06	Up Regulated in Acute
ENSG00000111247.14	RAD51AP1	protein_coding	88.1176	2.63835	0.596301	4.42453	9.6652e-06	0.000387493	Up Regulated in Acute
ENSG00000111275.12	ALDH2	protein_coding	1645.12	-1.27565	0.287169	-4.44215	8.90647e-06	0.000364331	Down Regulated in Acute
ENSG00000111291.8	GPRC5D	protein_coding	206.701	5.05734	0.772567	6.54616	5.90356e-11	1.42524e-08	Up Regulated in Acute
ENSG00000111331.12	OAS3	protein_coding	4724.38	1.81338	0.539393	3.36188	0.000774134	0.0129353	Up Regulated in Acute
ENSG00000111335.12	OAS2	protein_coding	6318.35	1.9302	0.360623	5.35241	8.67915e-08	7.22875e-06	Up Regulated in Acute
ENSG00000111602.11	TIMELESS	protein_coding	641.048	1.22172	0.322454	3.78881	0.00015137	0.00356017	Up Regulated in Acute
ENSG00000111665.11	CDCA3	protein_coding	143.493	3.26813	0.687279	4.75517	1.98278e-06	0.000102685	Up Regulated in Acute
ENSG00000111796.3	KLRB1	protein_coding	965.853	-2.40863	0.330938	-7.27818	3.38355e-13	1.76359e-10	Down Regulated in Acute
ENSG00000111885.6	MAN1A1	protein_coding	1866.37	2.63942	0.505008	5.22648	1.72764e-07	1.29237e-05	Up Regulated in Acute
ENSG00000111886.10	GABRR2	protein_coding	47.9309	2.61249	0.624918	4.18054	2.90821e-05	0.00093094	Up Regulated in Acute
ENSG00000112029.9	FBXO5	protein_coding	220.886	2.25655	0.534182	4.22431	2.39673e-05	0.000795201	Up Regulated in Acute
ENSG00000112033.13	PPARD	protein_coding	382.859	-0.876289	0.308738	-2.83829	0.0045356	0.0467983	Down Regulated in Acute
ENSG00000112096.16	SOD2	protein_coding	3303.25	-1.23495	0.269008	-4.59073	4.41695e-06	0.000200475	Down Regulated in Acute
ENSG00000112110.9	MRPL18	protein_coding	557.351	1.24091	0.379498	3.26988	0.00107592	0.0166202	Up Regulated in Acute
ENSG00000112118.17	MCM3	protein_coding	1287.63	1.31328	0.314149	4.18043	2.90955e-05	0.00093094	Up Regulated in Acute
ENSG00000112137.16	PHACTR1	protein_coding	202.349	-1.87751	0.375842	-4.99547	5.86936e-07	3.60597e-05	Down Regulated in Acute
ENSG00000112149.9	CD83	protein_coding	757.554	-2.16224	0.50906	-4.24752	2.16152e-05	0.000738391	Down Regulated in Acute
ENSG00000112182.14	BACH2	protein_coding	483.887	-1.0571	0.363293	-2.90978	0.0036168	0.0396765	Down Regulated in Acute
ENSG00000112195.8	TREML2	protein_coding	173.636	1.69125	0.512649	3.29904	0.000970154	0.0153084	Up Regulated in Acute
ENSG00000112237.12	CCNC	protein_coding	950.402	1.26319	0.401099	3.14931	0.00163656	0.0226207	Up Regulated in Acute
ENSG00000112276.13	BVES	protein_coding	14.4662	4.68727	1.1684	4.01171	6.0281e-05	0.00168516	Up Regulated in Acute
ENSG00000112293.14	GPLD1	protein_coding	13.544	3.29344	1.16195	2.83441	0.00459103	0.0471595	Up Regulated in Acute
ENSG00000112303.13	VNN2	protein_coding	1951.56	-1.2614	0.275757	-4.57433	4.77752e-06	0.000214431	Down Regulated in Acute
ENSG00000112304.10	ACOT13	protein_coding	295.799	1.15806	0.355692	3.25579	0.00113078	0.0172025	Up Regulated in Acute
ENSG00000112394.16	SLC16A10	protein_coding	50.01	-1.74766	0.574247	-3.0434	0.00233923	0.0291646	Down Regulated in Acute
ENSG00000112473.16	SLC39A7	protein_coding	1343.07	1.43065	0.392799	3.64219	0.000270329	0.00566533	Up Regulated in Acute
ENSG00000112578.9	BYSL	protein_coding	125.758	1.40802	0.429791	3.27605	0.0010527	0.0163553	Up Regulated in Acute
ENSG00000112742.9	TTK	protein_coding	118.345	4.61384	0.73613	6.2677	3.66429e-10	7.40096e-08	Up Regulated in Acute
ENSG00000112787.12	FBRSL1	protein_coding	493.005	-1.60947	0.384847	-4.18211	2.8882e-05	0.000927783	Down Regulated in Acute
ENSG00000112902.11	SEMA5A	protein_coding	30.6041	-2.96489	0.87562	-3.38605	0.000709066	0.0120348	Down Regulated in Acute
ENSG00000112984.11	KIF20A	protein_coding	94.083	3.88154	0.664767	5.83894	5.25334e-09	6.68374e-07	Up Regulated in Acute
ENSG00000113070.7	HBEGF	protein_coding	254.949	-2.11401	0.485904	-4.35067	1.35723e-05	0.000507643	Down Regulated in Acute
ENSG00000113140.10	SPARC	protein_coding	514.957	1.41402	0.468137	3.02053	0.00252337	0.0308416	Up Regulated in Acute
ENSG00000113282.13	CLINT1	protein_coding	1722.11	1.43828	0.440128	3.26786	0.00108363	0.0166966	Up Regulated in Acute
ENSG00000113319.11	RASGRF2	protein_coding	270.698	-1.39435	0.386126	-3.61113	0.000304867	0.00619628	Down Regulated in Acute
ENSG00000113368.11	LMNB1	protein_coding	1212.94	1.86064	0.540541	3.44218	0.000577052	0.0102454	Up Regulated in Acute
ENSG00000113387.11	SUB1	protein_coding	7783.9	1.9159	0.419853	4.56327	5.03637e-06	0.000224514	Up Regulated in Acute
ENSG00000113407.13	TARS	protein_coding	1181.6	1.32409	0.335478	3.94687	7.91784e-05	0.00210076	Up Regulated in Acute
ENSG00000113532.12	ST8SIA4	protein_coding	800.683	1.07345	0.301006	3.56621	0.000362181	0.00699179	Up Regulated in Acute
ENSG00000113615.12	SEC24A	protein_coding	760.352	2.52273	0.574972	4.38756	1.14628e-05	0.000442042	Up Regulated in Acute
ENSG00000113742.12	CPEB4	protein_coding	698.839	1.2824	0.36011	3.56114	0.000369245	0.00710269	Up Regulated in Acute
ENSG00000113790.10	EHHADH	protein_coding	34.9276	1.82543	0.604177	3.02136	0.00251645	0.0308036	Up Regulated in Acute
ENSG00000113810.15	SMC4	protein_coding	1539.71	1.43137	0.277216	5.16338	2.42534e-07	1.74949e-05	Up Regulated in Acute
ENSG00000113924.11	HGD	protein_coding	50.5835	-1.82175	0.628084	-2.90048	0.0037259	0.040459	Down Regulated in Acute
ENSG00000114054.13	PCCB	protein_coding	415.596	1.01804	0.345656	2.94524	0.00322704	0.0365912	Up Regulated in Acute
ENSG00000114346.13	ECT2	protein_coding	131.997	2.75728	0.576478	4.78298	1.72717e-06	9.12015e-05	Up Regulated in Acute
ENSG00000114529.12	C3orf52	protein_coding	14.1806	2.71452	0.91675	2.96103	0.00306615	0.0352619	Up Regulated in Acute
ENSG00000114626.17	ABTB1	protein_coding	1239.33	-0.880416	0.286384	-3.07425	0.00211032	0.0269554	Down Regulated in Acute
ENSG00000114812.12	VIPR1	protein_coding	584.819	-1.59178	0.333402	-4.77437	1.80271e-06	9.4266e-05	Down Regulated in Acute
ENSG00000114850.6	SSR3	protein_coding	3390.12	1.37281	0.329136	4.17094	3.03351e-05	0.000961089	Up Regulated in Acute
ENSG00000114861.18	FOXP1	protein_coding	1605.68	-1.8409	0.327773	-5.61639	1.94993e-08	2.07143e-06	Down Regulated in Acute
ENSG00000115008.5	IL1A	protein_coding	8.03929	-5.69215	2.01599	-2.8235	0.00475017	0.0482725	Down Regulated in Acute
ENSG00000115091.11	ACTR3	protein_coding	4993.99	0.777968	0.267258	2.91093	0.00360357	0.0395829	Up Regulated in Acute
ENSG00000115155.16	OTOF	protein_coding	585.918	5.52473	1.10234	5.01182	5.39187e-07	3.39935e-05	Up Regulated in Acute
ENSG00000115163.14	CENPA	protein_coding	48.0446	4.0343	0.718575	5.6143	1.97354e-08	2.07143e-06	Up Regulated in Acute
ENSG00000115232.13	ITGA4	protein_coding	3692.97	1.11643	0.376689	2.96378	0.00303881	0.0350746	Up Regulated in Acute
ENSG00000115233.11	PSMD14	protein_coding	812.797	1.23644	0.312856	3.9521	7.74683e-05	0.0020667	Up Regulated in Acute
ENSG00000115267.5	IFIH1	protein_coding	1496.21	2.08354	0.41559	5.01346	5.34586e-07	3.39935e-05	Up Regulated in Acute
ENSG00000115364.13	MRPL19	protein_coding	339.614	0.966998	0.324378	2.98108	0.00287236	0.0336315	Up Regulated in Acute
ENSG00000115392.11	FANCL	protein_coding	180.644	1.28225	0.350949	3.65366	0.000258529	0.00546054	Up Regulated in Acute
ENSG00000115414.18	FN1	protein_coding	18.9904	4.93906	1.05008	4.70351	2.55727e-06	0.00012675	Up Regulated in Acute
ENSG00000115415.18	STAT1	protein_coding	6760.82	1.85942	0.445694	4.17198	3.01967e-05	0.000959452	Up Regulated in Acute
ENSG00000115419.12	GLS	protein_coding	1586.03	0.862563	0.286019	3.01576	0.0025634	0.0310723	Up Regulated in Acute
ENSG00000115514.11	TXNDC9	protein_coding	353.531	1.2182	0.307289	3.96435	7.35975e-05	0.00197868	Up Regulated in Acute
ENSG00000115677.16	HDLBP	protein_coding	4044.81	1.25894	0.273752	4.59885	4.24836e-06	0.000193912	Up Regulated in Acute
ENSG00000115687.13	PASK	protein_coding	667.294	-0.971477	0.30666	-3.16793	0.00153527	0.0214964	Down Regulated in Acute
ENSG00000115806.12	GORASP2	protein_coding	1218.95	0.956294	0.339618	2.81579	0.0048657	0.0490762	Up Regulated in Acute
ENSG00000115884.10	SDC1	protein_coding	135.621	5.11544	0.73913	6.9209	4.48777e-12	1.54284e-09	Up Regulated in Acute
ENSG00000115902.10	SLC1A4	protein_coding	750.629	1.75433	0.413568	4.24193	2.21604e-05	0.000749095	Up Regulated in Acute
ENSG00000115977.18	AAK1	protein_coding	1712.55	-1.59982	0.295258	-5.41836	6.01498e-08	5.41971e-06	Down Regulated in Acute
ENSG00000116106.11	EPHA4	protein_coding	172.993	-1.52059	0.450419	-3.37595	0.000735602	0.012394	Down Regulated in Acute
ENSG00000116299.16	KIAA1324	protein_coding	95.0821	-2.17824	0.470173	-4.63285	3.60671e-06	0.000168229	Down Regulated in Acute
ENSG00000116337.15	AMPD2	protein_coding	1956.32	-1.08479	0.307913	-3.52304	0.000426628	0.00796932	Down Regulated in Acute
ENSG00000116406.18	EDEM3	protein_coding	887.118	1.30437	0.343648	3.79566	0.00014725	0.00347513	Up Regulated in Acute
ENSG00000116574.5	RHOU	protein_coding	747.17	-0.890209	0.293921	-3.02873	0.00245581	0.0302065	Down Regulated in Acute
ENSG00000116663.10	FBXO6	protein_coding	503.451	1.27523	0.303588	4.20054	2.66283e-05	0.000872739	Up Regulated in Acute
ENSG00000116667.12	C1orf21	protein_coding	330.44	-1.72046	0.363707	-4.73034	2.24144e-06	0.000113533	Down Regulated in Acute
ENSG00000116690.11	PRG4	protein_coding	10.8759	-3.55242	1.26379	-2.81092	0.00493995	0.0495467	Down Regulated in Acute
ENSG00000116729.13	WLS	protein_coding	141.699	-1.40113	0.442245	-3.16822	0.00153375	0.0214964	Down Regulated in Acute
ENSG00000116748.19	AMPD1	protein_coding	23.7525	5.49703	1.03716	5.30007	1.15761e-07	9.35232e-06	Up Regulated in Acute
ENSG00000116830.11	TTF2	protein_coding	359.843	0.977355	0.338046	2.89119	0.00383791	0.0414855	Up Regulated in Acute
ENSG00000116985.10	BMP8B	protein_coding	181.935	1.94681	0.602602	3.23067	0.00123499	0.0184426	Up Regulated in Acute
ENSG00000117054.13	ACADM	protein_coding	680.169	1.987	0.32855	6.0478	1.4684e-09	2.34915e-07	Up Regulated in Acute
ENSG00000117118.9	SDHB	protein_coding	1322.73	0.861649	0.277768	3.10204	0.0019219	0.0251858	Up Regulated in Acute
ENSG00000117143.13	UAP1	protein_coding	1086.74	2.50976	0.477073	5.26076	1.43461e-07	1.10383e-05	Up Regulated in Acute
ENSG00000117226.11	GBP3	protein_coding	783.683	1.6855	0.561169	3.00355	0.00266854	0.0320343	Up Regulated in Acute
ENSG00000117228.9	GBP1	protein_coding	3152.12	2.52437	0.411669	6.13204	8.67598e-10	1.52377e-07	Up Regulated in Acute
ENSG00000117281.15	CD160	protein_coding	161.97	-1.6342	0.512704	-3.18741	0.00143553	0.0204906	Down Regulated in Acute
ENSG00000117399.13	CDC20	protein_coding	311.782	4.43677	0.632337	7.01647	2.27551e-12	8.75421e-10	Up Regulated in Acute
ENSG00000117411.16	B4GALT2	protein_coding	84.32	2.98139	0.506194	5.88982	3.86621e-09	5.12051e-07	Up Regulated in Acute
ENSG00000117450.13	PRDX1	protein_coding	3468.46	1.02521	0.330295	3.10392	0.00190976	0.0250877	Up Regulated in Acute
ENSG00000117523.15	PRRC2C	protein_coding	8807.92	-1.25873	0.415211	-3.03155	0.00243302	0.0300326	Down Regulated in Acute
ENSG00000117593.9	DARS2	protein_coding	244.567	1.91584	0.532168	3.60006	0.000318148	0.00637796	Up Regulated in Acute
ENSG00000117602.11	RCAN3	protein_coding	999.875	-1.42929	0.292193	-4.89159	1.00023e-06	5.71088e-05	Down Regulated in Acute
ENSG00000117632.20	STMN1	protein_coding	1572.9	2.05	0.4654	4.40481	1.05878e-05	0.000413231	Up Regulated in Acute
ENSG00000117643.14	MAN1C1	protein_coding	217.107	-1.14683	0.341498	-3.35823	0.000784447	0.0130402	Down Regulated in Acute
ENSG00000117650.12	NEK2	protein_coding	67.6792	3.64312	0.616527	5.9091	3.43976e-09	4.67056e-07	Up Regulated in Acute
ENSG00000117724.12	CENPF	protein_coding	402.896	3.34107	0.560626	5.95954	2.52947e-09	3.64534e-07	Up Regulated in Acute
ENSG00000118193.11	KIF14	protein_coding	67.3355	3.98279	0.6542	6.08804	1.14302e-09	1.92384e-07	Up Regulated in Acute
ENSG00000118200.14	CAMSAP2	protein_coding	93.4094	-1.31114	0.4021	-3.26072	0.00111131	0.0169401	Down Regulated in Acute
ENSG00000118363.11	SPCS2	protein_coding	1853.79	1.50462	0.378045	3.98	6.89165e-05	0.00188268	Up Regulated in Acute
ENSG00000118689.14	FOXO3	protein_coding	599.34	-0.770561	0.263778	-2.92124	0.00348638	0.0386371	Down Regulated in Acute
ENSG00000118705.16	RPN2	protein_coding	6647.78	1.0505	0.34494	3.04547	0.00232319	0.0290318	Up Regulated in Acute
ENSG00000118816.9	CCNI	protein_coding	5112.96	-0.880579	0.282025	-3.12235	0.00179416	0.024043	Down Regulated in Acute
ENSG00000118985.14	ELL2	protein_coding	1702.76	3.52878	0.35569	9.92094	3.37549e-23	1.81804e-19	Up Regulated in Acute
ENSG00000119013.8	NDUFB3	protein_coding	1056.52	1.16569	0.368058	3.16713	0.0015395	0.0214997	Up Regulated in Acute
ENSG00000119326.14	CTNNAL1	protein_coding	102.703	2.17421	0.663492	3.27692	0.00104945	0.0163205	Up Regulated in Acute
ENSG00000119411.10	BSPRY	protein_coding	25.9214	3.14003	0.845282	3.71477	0.000203389	0.00448601	Up Regulated in Acute
ENSG00000119421.6	NDUFA8	protein_coding	434.573	1.44411	0.50099	2.88251	0.00394523	0.042182	Up Regulated in Acute
ENSG00000119523.9	ALG2	protein_coding	421.831	1.16932	0.387111	3.02063	0.00252249	0.0308416	Up Regulated in Acute
ENSG00000119669.4	IRF2BPL	protein_coding	243.185	-1.36523	0.438568	-3.11293	0.00185237	0.0246019	Down Regulated in Acute
ENSG00000119812.18	FAM98A	protein_coding	518.009	1.38123	0.318535	4.33619	1.44973e-05	0.000538499	Up Regulated in Acute
ENSG00000119866.20	BCL11A	protein_coding	311.069	-1.41193	0.334536	-4.22056	2.43701e-05	0.000806911	Down Regulated in Acute
ENSG00000119915.4	ELOVL3	protein_coding	30.826	2.53543	0.682358	3.71569	0.000202653	0.00447944	Up Regulated in Acute
ENSG00000119917.13	IFIT3	protein_coding	3643.93	3.85412	0.920881	4.18525	2.84852e-05	0.00091869	Up Regulated in Acute
ENSG00000119922.8	IFIT2	protein_coding	2503.32	1.94225	0.567684	3.42135	0.000623109	0.010826	Up Regulated in Acute
ENSG00000119950.20	MXI1	protein_coding	411.489	-1.27618	0.356564	-3.57911	0.000344762	0.00676051	Down Regulated in Acute
ENSG00000119969.14	HELLS	protein_coding	184.864	2.22885	0.618798	3.6019	0.000315896	0.00635434	Up Regulated in Acute
ENSG00000120254.15	MTHFD1L	protein_coding	161.492	2.14178	0.595569	3.59619	0.000322911	0.00642561	Up Regulated in Acute
ENSG00000120278.14	PLEKHG1	protein_coding	109.132	-1.37758	0.409297	-3.36573	0.000763405	0.012809	Down Regulated in Acute
ENSG00000120280.5	CXorf21	protein_coding	462.74	1.19843	0.38917	3.07944	0.0020739	0.0265952	Up Regulated in Acute
ENSG00000120333.4	MRPS14	protein_coding	480.828	1.21067	0.360239	3.36074	0.000777332	0.0129619	Up Regulated in Acute
ENSG00000120334.15	CENPL	protein_coding	73.217	1.49949	0.516384	2.90384	0.00368622	0.0401643	Up Regulated in Acute
ENSG00000120526.10	NUDCD1	protein_coding	219.244	1.36105	0.368271	3.69579	0.000219204	0.00476062	Up Regulated in Acute
ENSG00000120656.11	TAF12	protein_coding	573.323	0.998662	0.319363	3.12704	0.00176577	0.0238556	Up Regulated in Acute
ENSG00000120708.16	TGFBI	protein_coding	5203.77	-0.831021	0.269578	-3.08268	0.00205147	0.0263915	Down Regulated in Acute
ENSG00000120725.12	SIL1	protein_coding	564.935	1.60475	0.306427	5.23697	1.63237e-07	1.23252e-05	Up Regulated in Acute
ENSG00000120802.13	TMPO	protein_coding	1947.41	0.874971	0.276131	3.16868	0.00153133	0.0214964	Up Regulated in Acute
ENSG00000120875.8	DUSP4	protein_coding	54.4848	-1.87135	0.633844	-2.95238	0.00315339	0.0360088	Down Regulated in Acute
ENSG00000120885.19	CLU	protein_coding	807.761	2.43309	0.485055	5.01612	5.27249e-07	3.39414e-05	Up Regulated in Acute
ENSG00000120896.13	SORBS3	protein_coding	286.682	-1.52269	0.41006	-3.71334	0.000204544	0.00449967	Down Regulated in Acute
ENSG00000120915.13	EPHX2	protein_coding	270.054	-1.07589	0.339959	-3.16475	0.00155217	0.021658	Down Regulated in Acute
ENSG00000120949.14	TNFRSF8	protein_coding	234.678	-1.73719	0.406142	-4.27729	1.89179e-05	0.000664511	Down Regulated in Acute
ENSG00000121152.9	NCAPH	protein_coding	158.899	2.99329	0.615065	4.86663	1.13516e-06	6.26999e-05	Up Regulated in Acute
ENSG00000121211.7	MND1	protein_coding	56.6234	3.51225	0.857818	4.0944	4.23264e-05	0.00126885	Up Regulated in Acute
ENSG00000121310.16	ECHDC2	protein_coding	806.492	-1.08907	0.364834	-2.98512	0.00283464	0.0333349	Down Regulated in Acute
ENSG00000121380.12	BCL2L14	protein_coding	25.1654	4.17935	1.0788	3.87408	0.00010703	0.0026542	Up Regulated in Acute
ENSG00000121413.12	ZSCAN18	protein_coding	280.594	-1.49418	0.390764	-3.82373	0.000131447	0.0031559	Down Regulated in Acute
ENSG00000121621.6	KIF18A	protein_coding	71.7421	2.12217	0.543529	3.90442	9.44519e-05	0.00242247	Up Regulated in Acute
ENSG00000121807.5	CCR2	protein_coding	3681.26	2.25031	0.496093	4.53605	5.73169e-06	0.000246967	Up Regulated in Acute
ENSG00000121858.10	TNFSF10	protein_coding	4990.64	1.65937	0.358201	4.6325	3.61279e-06	0.000168229	Up Regulated in Acute
ENSG00000121931.15	LRIF1	protein_coding	164.186	1.56865	0.521426	3.00838	0.00262643	0.0316937	Up Regulated in Acute
ENSG00000121940.15	CLCC1	protein_coding	419.99	0.82308	0.290297	2.8353	0.00457822	0.0470583	Up Regulated in Acute
ENSG00000121966.6	CXCR4	protein_coding	7563.43	-1.89622	0.458701	-4.13389	3.56674e-05	0.00110405	Down Regulated in Acute
ENSG00000122188.12	LAX1	protein_coding	607.294	2.25583	0.288211	7.82703	4.9952e-15	5.27966e-12	Up Regulated in Acute
ENSG00000122218.14	COPA	protein_coding	2977.07	1.03304	0.298827	3.45699	0.000546244	0.0097635	Up Regulated in Acute
ENSG00000122223.12	CD244	protein_coding	996.581	-1.32532	0.308573	-4.29501	1.74688e-05	0.000623039	Down Regulated in Acute
ENSG00000122543.10	OCM	protein_coding	41.4653	-2.67739	0.661185	-4.04937	5.13547e-05	0.00148708	Down Regulated in Acute
ENSG00000122591.11	FAM126A	protein_coding	552.289	1.27205	0.345029	3.6868	0.000227095	0.00491877	Up Regulated in Acute
ENSG00000122643.18	NT5C3A	protein_coding	1795.5	1.79608	0.356274	5.0413	4.62376e-07	3.07451e-05	Up Regulated in Acute
ENSG00000122952.16	ZWINT	protein_coding	429.12	3.5169	0.51043	6.89006	5.57672e-12	1.79657e-09	Up Regulated in Acute
ENSG00000122966.13	CIT	protein_coding	93.1057	1.59243	0.554661	2.87099	0.00409186	0.0433549	Up Regulated in Acute
ENSG00000123095.5	BHLHE41	protein_coding	65.1133	2.04896	0.657806	3.11484	0.00184047	0.0244962	Up Regulated in Acute
ENSG00000123131.12	PRDX4	protein_coding	1001.03	1.88242	0.493343	3.81564	0.000135831	0.00322758	Up Regulated in Acute
ENSG00000123352.17	SPATS2	protein_coding	548.613	2.20492	0.416197	5.29777	1.17222e-07	9.37663e-06	Up Regulated in Acute
ENSG00000123358.19	NR4A1	protein_coding	287.64	-2.06036	0.485676	-4.24226	2.21279e-05	0.000749095	Down Regulated in Acute
ENSG00000123374.10	CDK2	protein_coding	351.858	1.21717	0.350074	3.4769	0.000507251	0.00919883	Up Regulated in Acute
ENSG00000123416.15	TUBA1B	protein_coding	6787.29	1.51328	0.333442	4.53837	5.66903e-06	0.000245577	Up Regulated in Acute
ENSG00000123453.16	SARDH	protein_coding	40.4952	-1.95669	0.653098	-2.99602	0.00273532	0.0326178	Down Regulated in Acute
ENSG00000123473.15	STIL	protein_coding	116.995	3.46543	0.544773	6.36125	2.00124e-10	4.25475e-08	Up Regulated in Acute
ENSG00000123485.11	HJURP	protein_coding	221.946	3.84539	0.544455	7.06282	1.63154e-12	6.7596e-10	Up Regulated in Acute
ENSG00000123562.16	MORF4L2	protein_coding	1412.79	0.879682	0.287771	3.05688	0.00223655	0.0282551	Up Regulated in Acute
ENSG00000123609.10	NMI	protein_coding	1564.63	0.936773	0.247787	3.78056	0.000156477	0.00365528	Up Regulated in Acute
ENSG00000123689.5	G0S2	protein_coding	176.887	-3.56248	0.754652	-4.72069	2.35043e-06	0.000118682	Down Regulated in Acute
ENSG00000123908.11	AGO2	protein_coding	809.968	-0.940904	0.33448	-2.81304	0.00490763	0.0493143	Down Regulated in Acute
ENSG00000123975.4	CKS2	protein_coding	247.223	2.84432	0.584491	4.86632	1.13697e-06	6.26999e-05	Up Regulated in Acute
ENSG00000123989.13	CHPF	protein_coding	138.93	3.06764	0.599174	5.11979	3.05876e-07	2.10313e-05	Up Regulated in Acute
ENSG00000124098.9	FAM210B	protein_coding	532.297	-1.23256	0.302177	-4.07892	4.52448e-05	0.00134248	Down Regulated in Acute
ENSG00000124151.18	NCOA3	protein_coding	3193.18	0.848573	0.270784	3.13376	0.00172579	0.0234527	Up Regulated in Acute
ENSG00000124203.5	ZNF831	protein_coding	396.683	-1.13499	0.30238	-3.75352	0.000174369	0.00399537	Down Regulated in Acute
ENSG00000124243.17	BCAS4	protein_coding	194.056	-1.39355	0.338636	-4.11518	3.86873e-05	0.00117723	Down Regulated in Acute
ENSG00000124256.14	ZBP1	protein_coding	2279.1	1.69365	0.343462	4.9311	8.17662e-07	4.7696e-05	Up Regulated in Acute
ENSG00000124275.14	MTRR	protein_coding	717.674	0.928569	0.319379	2.90742	0.00364418	0.0398521	Up Regulated in Acute
ENSG00000124507.10	PACSIN1	protein_coding	105.685	1.84311	0.576668	3.19615	0.00139276	0.0201331	Up Regulated in Acute
ENSG00000124570.17	SERPINB6	protein_coding	1594.48	-0.793719	0.25451	-3.11862	0.00181699	0.0242274	Down Regulated in Acute
ENSG00000124635.8	HIST1H2BJ	protein_coding	48.0349	2.24177	0.587166	3.81794	0.000134569	0.00320704	Up Regulated in Acute
ENSG00000124641.14	MED20	protein_coding	223.814	1.3109	0.304285	4.30811	1.64652e-05	0.000595178	Up Regulated in Acute
ENSG00000124731.12	TREM1	protein_coding	656.802	-1.51487	0.391006	-3.87428	0.000106943	0.0026542	Down Regulated in Acute
ENSG00000124766.5	SOX4	protein_coding	224.587	-2.13722	0.480218	-4.45053	8.56603e-06	0.000353593	Down Regulated in Acute
ENSG00000124772.11	CPNE5	protein_coding	860.088	2.24267	0.395401	5.67188	1.41236e-08	1.56307e-06	Up Regulated in Acute
ENSG00000124786.9	SLC35B3	protein_coding	313.033	1.13791	0.38712	2.93943	0.00328818	0.0371022	Up Regulated in Acute
ENSG00000125148.6	MT2A	protein_coding	1004.35	1.34843	0.455355	2.96126	0.00306379	0.0352597	Up Regulated in Acute
ENSG00000125510.15	OPRL1	protein_coding	140.278	-1.3752	0.47707	-2.8826	0.00394413	0.042182	Down Regulated in Acute
ENSG00000125520.13	SLC2A4RG	protein_coding	376.838	-1.18093	0.32537	-3.6295	0.000283974	0.0058751	Down Regulated in Acute
ENSG00000125703.14	ATG4C	protein_coding	288.166	0.962387	0.326238	2.94995	0.00317821	0.0362074	Up Regulated in Acute
ENSG00000125844.15	RRBP1	protein_coding	1882.42	1.33312	0.283515	4.70211	2.57493e-06	0.000127234	Up Regulated in Acute
ENSG00000125869.9	LAMP5	protein_coding	112.77	1.64905	0.371523	4.43861	9.05403e-06	0.000369432	Up Regulated in Acute
ENSG00000125885.13	MCM8	protein_coding	209.91	1.7707	0.435145	4.06923	4.71698e-05	0.00138829	Up Regulated in Acute
ENSG00000125898.12	FAM110A	protein_coding	344.847	-1.33242	0.343353	-3.88061	0.000104193	0.00261827	Down Regulated in Acute
ENSG00000126215.13	XRCC3	protein_coding	124.422	1.41901	0.379121	3.74289	0.000181917	0.00409272	Up Regulated in Acute
ENSG00000126351.12	THRA	protein_coding	333.399	-1.07414	0.339601	-3.16294	0.00156184	0.0217741	Down Regulated in Acute
ENSG00000126353.3	CCR7	protein_coding	1476.8	-1.22625	0.351436	-3.48925	0.000484381	0.00883367	Down Regulated in Acute
ENSG00000126368.5	NR1D1	protein_coding	139.29	-2.50218	0.421862	-5.93128	3.00584e-09	4.18693e-07	Down Regulated in Acute
ENSG00000126457.20	PRMT1	protein_coding	988.617	1.08002	0.336407	3.21046	0.00132521	0.019424	Up Regulated in Acute
ENSG00000126709.14	IFI6	protein_coding	4850.6	2.53017	0.445789	5.67571	1.38115e-08	1.53908e-06	Up Regulated in Acute
ENSG00000126759.12	CFP	protein_coding	3140.1	-1.02821	0.306718	-3.35231	0.000801412	0.0132541	Down Regulated in Acute
ENSG00000126787.12	DLGAP5	protein_coding	253.507	2.78292	0.580659	4.79269	1.64556e-06	8.77522e-05	Up Regulated in Acute
ENSG00000126822.15	PLEKHG3	protein_coding	662.373	-1.58448	0.421457	-3.75953	0.000170235	0.00393513	Down Regulated in Acute
ENSG00000126861.4	OMG	protein_coding	19.5512	3.29315	1.04973	3.13714	0.00170605	0.0233613	Up Regulated in Acute
ENSG00000127152.17	BCL11B	protein_coding	1102.67	-1.34349	0.286249	-4.69345	2.68642e-06	0.000131537	Down Regulated in Acute
ENSG00000127418.14	FGFRL1	protein_coding	147.474	-2.36154	0.515604	-4.58014	4.64674e-06	0.000209142	Down Regulated in Acute
ENSG00000127507.17	ADGRE2	protein_coding	2030.67	-1.0656	0.352133	-3.02614	0.002477	0.0303898	Down Regulated in Acute
ENSG00000127528.5	KLF2	protein_coding	3086.93	-1.17897	0.387351	-3.04366	0.00233719	0.0291617	Down Regulated in Acute
ENSG00000127564.16	PKMYT1	protein_coding	75.8414	3.63761	0.670166	5.42792	5.70153e-08	5.20482e-06	Up Regulated in Acute
ENSG00000127585.11	FBXL16	protein_coding	76.5019	-1.28319	0.45439	-2.82397	0.00474322	0.0482322	Down Regulated in Acute
ENSG00000127663.14	KDM4B	protein_coding	514.288	-1.13173	0.343418	-3.2955	0.000982469	0.0154724	Down Regulated in Acute
ENSG00000128011.4	LRFN1	protein_coding	52.0033	-2.24055	0.637387	-3.51521	0.000439411	0.00817032	Down Regulated in Acute
ENSG00000128040.10	SPINK2	protein_coding	36.2562	-2.56809	0.842087	-3.04967	0.0022909	0.0287554	Down Regulated in Acute
ENSG00000128050.8	PAICS	protein_coding	897.724	1.76503	0.354846	4.97409	6.55547e-07	3.89424e-05	Up Regulated in Acute
ENSG00000128165.8	ADM2	protein_coding	21.0552	2.9723	0.863036	3.44401	0.000573158	0.0101882	Up Regulated in Acute
ENSG00000128228.4	SDF2L1	protein_coding	364.284	1.86986	0.586319	3.18914	0.00142695	0.0204643	Up Regulated in Acute
ENSG00000128245.14	YWHAH	protein_coding	1212.72	0.878556	0.264989	3.31545	0.000914965	0.0146958	Up Regulated in Acute
ENSG00000128268.11	MGAT3	protein_coding	89.0707	3.13412	0.624702	5.01699	5.24879e-07	3.39278e-05	Up Regulated in Acute
ENSG00000128383.12	APOBEC3A	protein_coding	2718.35	1.31022	0.417633	3.13724	0.00170547	0.0233613	Up Regulated in Acute
ENSG00000128394.16	APOBEC3F	protein_coding	244.479	1.37411	0.383375	3.58423	0.000338068	0.00667789	Up Regulated in Acute
ENSG00000128536.15	CDHR3	protein_coding	73.7273	-2.23628	0.516049	-4.33346	1.46783e-05	0.000542717	Down Regulated in Acute
ENSG00000128578.9	STRIP2	protein_coding	22.9736	3.13285	0.832543	3.76299	0.000167893	0.00389772	Up Regulated in Acute
ENSG00000128595.16	CALU	protein_coding	1040.03	1.73858	0.374944	4.63691	3.53664e-06	0.000165638	Up Regulated in Acute
ENSG00000128891.15	C15orf57	protein_coding	745.169	0.993138	0.344515	2.88272	0.00394263	0.042182	Up Regulated in Acute
ENSG00000128965.11	CHAC1	protein_coding	32.6874	2.81547	0.935362	3.01003	0.00261219	0.0315454	Up Regulated in Acute
ENSG00000129083.12	COPB1	protein_coding	2056.91	0.861801	0.282423	3.05145	0.00227739	0.028659	Up Regulated in Acute
ENSG00000129128.12	SPCS3	protein_coding	3232.9	0.950905	0.327357	2.90479	0.00367497	0.0401007	Up Regulated in Acute
ENSG00000129173.12	E2F8	protein_coding	87.6669	4.03695	0.658228	6.13305	8.62078e-10	1.52377e-07	Up Regulated in Acute
ENSG00000129195.15	FAM64A	protein_coding	18.0487	3.95243	1.02897	3.84115	0.000122457	0.00296651	Up Regulated in Acute
ENSG00000129255.14	MPDU1	protein_coding	1166.88	0.769899	0.260287	2.95788	0.0030976	0.0354977	Up Regulated in Acute
ENSG00000129355.6	CDKN2D	protein_coding	910.025	-0.924225	0.256528	-3.60282	0.000314782	0.00634195	Down Regulated in Acute
ENSG00000129484.13	PARP2	protein_coding	324.901	1.32073	0.404214	3.26739	0.00108543	0.0166966	Up Regulated in Acute
ENSG00000129515.18	SNX6	protein_coding	998.71	1.10405	0.386503	2.85652	0.00428313	0.0448521	Up Regulated in Acute
ENSG00000129538.13	RNASE1	protein_coding	184.955	4.02906	0.484925	8.30864	9.68044e-17	1.42197e-13	Up Regulated in Acute
ENSG00000129757.12	CDKN1C	protein_coding	414.322	-4.04095	0.682494	-5.92086	3.20266e-09	4.38547e-07	Down Regulated in Acute
ENSG00000129810.14	SGOL1	protein_coding	66.3183	2.41824	0.672072	3.59819	0.000320444	0.00639227	Up Regulated in Acute
ENSG00000129824.15	RPS4Y1	protein_coding	2726.67	-1.37387	0.422008	-3.25555	0.00113171	0.0172025	Down Regulated in Acute
ENSG00000130005.11	GAMT	protein_coding	103.371	-1.85952	0.595081	-3.12482	0.00177913	0.023936	Down Regulated in Acute
ENSG00000130382.8	MLLT1	protein_coding	556.537	-1.25698	0.422087	-2.97801	0.00290122	0.0337737	Down Regulated in Acute
ENSG00000130518.16	KIAA1683	protein_coding	115.473	-2.13328	0.60518	-3.52503	0.00042344	0.00793609	Down Regulated in Acute
ENSG00000130522.5	JUND	protein_coding	2281.54	-1.85337	0.362722	-5.10963	3.22793e-07	2.1823e-05	Down Regulated in Acute
ENSG00000130558.18	OLFM1	protein_coding	50.9861	-2.50699	0.649366	-3.86068	0.000113071	0.00277659	Down Regulated in Acute
ENSG00000130653.15	PNPLA7	protein_coding	90.3893	-1.40661	0.480994	-2.92438	0.00345145	0.038461	Down Regulated in Acute
ENSG00000130707.17	ASS1	protein_coding	10.5706	5.53569	1.46339	3.78279	0.000155082	0.00363161	Up Regulated in Acute
ENSG00000130723.17	PRRC2B	protein_coding	2085.59	-0.982639	0.319676	-3.07386	0.00211312	0.0269698	Down Regulated in Acute
ENSG00000130940.14	CASZ1	protein_coding	104.163	-1.46064	0.479776	-3.04442	0.00233131	0.0291108	Down Regulated in Acute
ENSG00000130956.13	HABP4	protein_coding	244.525	-1.5518	0.401744	-3.86265	0.000112163	0.00276641	Down Regulated in Acute
ENSG00000130997.16	POLN	protein_coding	26.2117	2.36838	0.743814	3.18411	0.00145202	0.0206347	Up Regulated in Acute
ENSG00000131142.13	CCL25	protein_coding	11.4025	5.82684	1.34772	4.32347	1.53594e-05	0.000561776	Up Regulated in Acute
ENSG00000131153.8	GINS2	protein_coding	189.431	3.63642	0.575168	6.32236	2.57591e-10	5.26855e-08	Up Regulated in Acute
ENSG00000131196.17	NFATC1	protein_coding	455.583	-1.34682	0.329469	-4.08786	4.35369e-05	0.00129791	Down Regulated in Acute
ENSG00000131242.15	RAB11FIP4	protein_coding	896.728	-0.99703	0.335887	-2.96834	0.00299409	0.0346637	Down Regulated in Acute
ENSG00000131355.14	ADGRE3	protein_coding	107.654	-1.63786	0.526766	-3.10928	0.00187543	0.0248184	Down Regulated in Acute
ENSG00000131400.7	NAPSA	protein_coding	37.8422	2.13325	0.682331	3.12642	0.00176947	0.0238857	Up Regulated in Acute
ENSG00000131462.7	TUBG1	protein_coding	259.927	2.39992	0.321017	7.47599	7.66253e-14	5.1588e-11	Up Regulated in Acute
ENSG00000131470.14	PSMC3IP	protein_coding	71.1976	2.5233	0.53617	4.70615	2.52441e-06	0.000125506	Up Regulated in Acute
ENSG00000131634.13	TMEM204	protein_coding	213.489	-1.38213	0.452432	-3.05489	0.00225144	0.0284209	Down Regulated in Acute
ENSG00000131724.10	IL13RA1	protein_coding	1046.19	-0.844956	0.276139	-3.0599	0.00221414	0.0280597	Down Regulated in Acute
ENSG00000131747.14	TOP2A	protein_coding	638.528	3.50546	0.477653	7.33892	2.15328e-13	1.28862e-10	Up Regulated in Acute
ENSG00000131871.14	VIMP	protein_coding	1217.47	1.41107	0.394206	3.57953	0.000344211	0.00675791	Up Regulated in Acute
ENSG00000132002.7	DNAJB1	protein_coding	2097.56	-1.39373	0.334086	-4.17177	3.02241e-05	0.000959452	Down Regulated in Acute
ENSG00000132109.9	TRIM21	protein_coding	1111.62	1.52206	0.377833	4.02839	5.61612e-05	0.00159202	Up Regulated in Acute
ENSG00000132170.19	PPARG	protein_coding	12.6765	2.77641	0.98232	2.82638	0.00470774	0.0479317	Up Regulated in Acute
ENSG00000132313.14	MRPL35	protein_coding	520.675	1.01787	0.298952	3.40479	0.000662152	0.0113941	Up Regulated in Acute
ENSG00000132357.13	CARD6	protein_coding	285.943	1.24508	0.375803	3.3131	0.000922664	0.0147609	Up Regulated in Acute
ENSG00000132432.13	SEC61G	protein_coding	1457.15	1.32945	0.420992	3.15789	0.00158915	0.0220787	Up Regulated in Acute
ENSG00000132436.11	FIGNL1	protein_coding	128.716	1.0716	0.368565	2.90749	0.0036434	0.0398521	Up Regulated in Acute
ENSG00000132464.11	ENAM	protein_coding	45.5525	5.65237	0.983593	5.74666	9.10255e-09	1.08146e-06	Up Regulated in Acute
ENSG00000132465.10	JCHAIN	protein_coding	85820.3	5.02209	1.24618	4.02999	5.57781e-05	0.00158461	Up Regulated in Acute
ENSG00000132481.6	TRIM47	protein_coding	29.0908	3.33194	0.849997	3.91994	8.85697e-05	0.00230824	Up Regulated in Acute
ENSG00000132485.12	ZRANB2	protein_coding	1920.12	0.891188	0.293946	3.03181	0.00243092	0.0300297	Up Regulated in Acute
ENSG00000132510.10	KDM6B	protein_coding	427.665	-1.21113	0.371341	-3.26149	0.00110827	0.0169098	Down Regulated in Acute
ENSG00000132530.16	XAF1	protein_coding	7049.23	1.9113	0.46062	4.1494	3.33351e-05	0.00103982	Up Regulated in Acute
ENSG00000132541.10	HRSP12	protein_coding	127.919	1.29919	0.404695	3.2103	0.00132595	0.019424	Up Regulated in Acute
ENSG00000132646.10	PCNA	protein_coding	1223.36	2.0447	0.391088	5.22822	1.71148e-07	1.28623e-05	Up Regulated in Acute
ENSG00000132793.11	LPIN3	protein_coding	10.5867	3.66149	1.22913	2.97894	0.00289252	0.0336967	Up Regulated in Acute
ENSG00000132823.10	OSER1	protein_coding	1187.9	-1.13272	0.313625	-3.61169	0.000304206	0.00619064	Down Regulated in Acute
ENSG00000132849.18	INADL	protein_coding	224.572	-1.22045	0.384404	-3.17491	0.0014988	0.0211324	Down Regulated in Acute
ENSG00000132963.7	POMP	protein_coding	1915.43	0.959637	0.337761	2.84117	0.00449479	0.0464662	Up Regulated in Acute
ENSG00000133059.16	DSTYK	protein_coding	500.173	-1.4472	0.307253	-4.71014	2.47551e-06	0.000123837	Down Regulated in Acute
ENSG00000133067.17	LGR6	protein_coding	179.08	-2.6074	0.638234	-4.08533	4.40133e-05	0.0013097	Down Regulated in Acute
ENSG00000133103.16	COG6	protein_coding	290.275	1.06873	0.356541	2.99749	0.00272213	0.0324847	Up Regulated in Acute
ENSG00000133106.14	EPSTI1	protein_coding	2793.42	1.68607	0.382959	4.40276	1.06882e-05	0.000414149	Up Regulated in Acute
ENSG00000133119.12	RFC3	protein_coding	159.941	1.12705	0.391184	2.88112	0.00396266	0.042291	Up Regulated in Acute
ENSG00000133134.11	BEX2	protein_coding	123.031	-1.13927	0.37568	-3.03255	0.00242495	0.0300018	Down Regulated in Acute
ENSG00000133138.19	TBC1D8B	protein_coding	20.7405	3.32063	1.1583	2.86682	0.00414617	0.0437296	Up Regulated in Acute
ENSG00000133216.16	EPHB2	protein_coding	169.256	2.40904	0.528042	4.56221	5.06184e-06	0.000224581	Up Regulated in Acute
ENSG00000133328.3	HRASLS2	protein_coding	251.722	4.04899	0.578063	7.00441	2.48035e-12	9.10852e-10	Up Regulated in Acute
ENSG00000133392.16	MYH11	protein_coding	23.0769	3.1574	0.851031	3.71009	0.000207184	0.00453614	Up Regulated in Acute
ENSG00000133574.9	GIMAP4	protein_coding	4371.7	1.01028	0.276584	3.65271	0.000259487	0.00547361	Up Regulated in Acute
ENSG00000133731.9	IMPA1	protein_coding	216.221	1.48423	0.500593	2.96495	0.00302729	0.0349912	Up Regulated in Acute
ENSG00000133739.15	LRRCC1	protein_coding	146.093	1.32408	0.360532	3.67257	0.000240119	0.00513887	Up Regulated in Acute
ENSG00000133740.10	E2F5	protein_coding	294.304	2.02857	0.389392	5.20958	1.89269e-07	1.40092e-05	Up Regulated in Acute
ENSG00000133872.13	SARAF	protein_coding	7754.81	-0.863429	0.285646	-3.02273	0.0025051	0.0307112	Down Regulated in Acute
ENSG00000134001.12	EIF2S1	protein_coding	1067.12	1.20804	0.348462	3.46676	0.000526764	0.00947823	Up Regulated in Acute
ENSG00000134057.14	CCNB1	protein_coding	330.831	2.90879	0.581967	4.9982	5.78666e-07	3.56874e-05	Up Regulated in Acute
ENSG00000134061.5	CD180	protein_coding	1101.96	2.27901	0.420385	5.42125	5.91845e-08	5.37249e-06	Up Regulated in Acute
ENSG00000134109.10	EDEM1	protein_coding	2989.3	1.10868	0.295599	3.75062	0.000176394	0.00402	Up Regulated in Acute
ENSG00000134153.9	EMC7	protein_coding	985.798	1.23905	0.415166	2.98448	0.00284059	0.0333563	Up Regulated in Acute
ENSG00000134242.15	PTPN22	protein_coding	823.238	1.17177	0.34705	3.37637	0.000734495	0.0123903	Up Regulated in Acute
ENSG00000134285.10	FKBP11	protein_coding	1146.61	1.64662	0.414655	3.97105	7.15562e-05	0.00193994	Up Regulated in Acute
ENSG00000134291.11	TMEM106C	protein_coding	618.419	1.55822	0.516221	3.01851	0.00254024	0.0309542	Up Regulated in Acute
ENSG00000134321.11	RSAD2	protein_coding	2319.46	2.71426	0.609533	4.45302	8.46713e-06	0.0003508	Up Regulated in Acute
ENSG00000134326.11	CMPK2	protein_coding	1182.99	2.56368	0.581842	4.40614	1.0523e-05	0.000411697	Up Regulated in Acute
ENSG00000134333.13	LDHA	protein_coding	6116.07	1.08251	0.308532	3.50857	0.000450517	0.00830987	Up Regulated in Acute
ENSG00000134452.19	FBXO18	protein_coding	1774.05	1.27592	0.310831	4.10488	4.04524e-05	0.00122174	Up Regulated in Acute
ENSG00000134490.13	TMEM241	protein_coding	61.218	1.67012	0.5624	2.96963	0.00298158	0.0345719	Up Regulated in Acute
ENSG00000134531.9	EMP1	protein_coding	100.627	1.44654	0.493391	2.93183	0.00336973	0.0377849	Up Regulated in Acute
ENSG00000134575.9	ACP2	protein_coding	526.65	1.03262	0.302286	3.41605	0.000635368	0.0109917	Up Regulated in Acute
ENSG00000134690.10	CDCA8	protein_coding	149.923	3.2195	0.587355	5.48135	4.22086e-08	4.01181e-06	Up Regulated in Acute
ENSG00000134755.14	DSC2	protein_coding	70.9848	-1.73607	0.463865	-3.74261	0.000182118	0.00409272	Down Regulated in Acute
ENSG00000134901.12	KDELC1	protein_coding	18.2572	4.24745	1.04476	4.06546	4.79369e-05	0.0014083	Up Regulated in Acute
ENSG00000134909.18	ARHGAP32	protein_coding	135.16	-1.412	0.432732	-3.26299	0.00110243	0.0168685	Down Regulated in Acute
ENSG00000134910.12	STT3A	protein_coding	2104.27	1.61445	0.416553	3.87575	0.000106297	0.00265053	Up Regulated in Acute
ENSG00000135047.14	CTSL	protein_coding	837.473	1.57255	0.454662	3.45872	0.000542746	0.0097225	Up Regulated in Acute
ENSG00000135069.13	PSAT1	protein_coding	191.038	2.78729	0.506834	5.49941	3.81057e-08	3.64326e-06	Up Regulated in Acute
ENSG00000135074.15	ADAM19	protein_coding	1892.58	1.10496	0.278628	3.96573	7.3171e-05	0.00197379	Up Regulated in Acute
ENSG00000135093.12	USP30	protein_coding	207.225	-0.93551	0.313881	-2.98047	0.00287811	0.0336372	Down Regulated in Acute
ENSG00000135114.12	OASL	protein_coding	1570.45	2.88165	0.503342	5.72503	1.03413e-08	1.20212e-06	Up Regulated in Acute
ENSG00000135148.11	TRAFD1	protein_coding	1498.5	1.0795	0.363134	2.97274	0.00295157	0.0342857	Up Regulated in Acute
ENSG00000135211.5	TMEM60	protein_coding	230.724	1.08486	0.341572	3.17607	0.00149285	0.0210668	Up Regulated in Acute
ENSG00000135336.14	ORC3	protein_coding	377.195	1.26719	0.403831	3.13792	0.0017015	0.0233386	Up Regulated in Acute
ENSG00000135426.14	TESPA1	protein_coding	1230.81	-0.880041	0.301252	-2.92128	0.003486	0.0386371	Down Regulated in Acute
ENSG00000135451.12	TROAP	protein_coding	147.229	2.56453	0.578775	4.43096	9.38139e-06	0.000378961	Up Regulated in Acute
ENSG00000135476.11	ESPL1	protein_coding	140.783	3.54196	0.593112	5.97183	2.34613e-09	3.47787e-07	Up Regulated in Acute
ENSG00000135535.14	CD164	protein_coding	3207.93	1.07438	0.368926	2.91218	0.00358921	0.0394789	Up Regulated in Acute
ENSG00000135540.11	NHSL1	protein_coding	36.5305	-1.68374	0.595091	-2.82939	0.00466374	0.0476639	Down Regulated in Acute
ENSG00000135631.15	RAB11FIP5	protein_coding	174.607	-1.42455	0.444954	-3.20157	0.00136679	0.0198603	Down Regulated in Acute
ENSG00000135678.11	CPM	protein_coding	125.493	-1.23251	0.398314	-3.09431	0.00197271	0.025685	Down Regulated in Acute
ENSG00000135679.21	MDM2	protein_coding	1623.34	0.886339	0.296456	2.98978	0.00279174	0.0330469	Up Regulated in Acute
ENSG00000135722.8	FBXL8	protein_coding	46.561	2.04522	0.622029	3.28798	0.00100908	0.0158144	Up Regulated in Acute
ENSG00000135862.5	LAMC1	protein_coding	342.806	2.08823	0.416895	5.00901	5.47112e-07	3.42645e-05	Up Regulated in Acute
ENSG00000135900.3	MRPL44	protein_coding	661.103	0.959319	0.272938	3.51479	0.00044011	0.0081739	Up Regulated in Acute
ENSG00000135916.15	ITM2C	protein_coding	4320.51	3.88651	0.526245	7.38536	1.52039e-13	9.44866e-11	Up Regulated in Acute
ENSG00000135925.8	WNT10A	protein_coding	29.5584	2.03474	0.690173	2.94815	0.00319679	0.0363503	Up Regulated in Acute
ENSG00000135929.8	CYP27A1	protein_coding	428.544	-2.06204	0.421096	-4.89684	9.73925e-07	5.58038e-05	Down Regulated in Acute
ENSG00000135960.9	EDAR	protein_coding	59.6836	-1.94871	0.519865	-3.74848	0.000177906	0.00403171	Down Regulated in Acute
ENSG00000136002.16	ARHGEF4	protein_coding	24.5206	-3.60922	1.00112	-3.60519	0.00031192	0.00629214	Down Regulated in Acute
ENSG00000136010.13	ALDH1L2	protein_coding	115.162	5.58871	0.638738	8.74962	2.14066e-18	4.32361e-15	Up Regulated in Acute
ENSG00000136122.15	BORA	protein_coding	230.16	1.17958	0.347498	3.39448	0.000687593	0.0117319	Up Regulated in Acute
ENSG00000136143.13	SUCLA2	protein_coding	265.55	1.49762	0.367728	4.07263	4.64855e-05	0.00137315	Up Regulated in Acute
ENSG00000136237.18	RAPGEF5	protein_coding	43.9358	4.38963	0.811941	5.40634	6.43242e-08	5.62278e-06	Up Regulated in Acute
ENSG00000136244.11	IL6	protein_coding	39.8568	1.93373	0.655813	2.9486	0.00319217	0.0363233	Up Regulated in Acute
ENSG00000136492.8	BRIP1	protein_coding	66.9265	3.2242	0.676755	4.76421	1.89597e-06	9.85049e-05	Up Regulated in Acute
ENSG00000136514.2	RTP4	protein_coding	464.372	1.6584	0.32917	5.03813	4.70099e-07	3.11306e-05	Up Regulated in Acute
ENSG00000136518.16	ACTL6A	protein_coding	556.715	1.03591	0.301182	3.43949	0.000582821	0.0102808	Up Regulated in Acute
ENSG00000136541.14	ERMN	protein_coding	445.134	-1.05127	0.36207	-2.90349	0.00369023	0.0401643	Down Regulated in Acute
ENSG00000136628.17	EPRS	protein_coding	1937.22	1.20215	0.332393	3.61666	0.00029843	0.00611158	Up Regulated in Acute
ENSG00000136630.12	HLX	protein_coding	90.6228	1.68443	0.463	3.63809	0.000274673	0.00574891	Up Regulated in Acute
ENSG00000136682.14	CBWD2	protein_coding	661.701	1.44596	0.320672	4.50916	6.50861e-06	0.000276027	Up Regulated in Acute
ENSG00000136810.12	TXN	protein_coding	1908.59	1.36081	0.355509	3.82777	0.000129308	0.00311553	Up Regulated in Acute
ENSG00000136824.18	SMC2	protein_coding	382.959	1.78405	0.416381	4.28464	1.83034e-05	0.000644328	Up Regulated in Acute
ENSG00000136827.11	TOR1A	protein_coding	835.18	0.974927	0.346498	2.81366	0.00489809	0.0492491	Up Regulated in Acute
ENSG00000136840.18	ST6GALNAC4	protein_coding	313.225	1.13935	0.405425	2.81026	0.00495018	0.0495877	Up Regulated in Acute
ENSG00000136960.12	ENPP2	protein_coding	81.0094	2.54813	0.73432	3.47005	0.000520366	0.0093945	Up Regulated in Acute
ENSG00000136982.5	DSCC1	protein_coding	47.8403	3.13937	0.692031	4.53645	5.72085e-06	0.000246967	Up Regulated in Acute
ENSG00000136986.9	DERL1	protein_coding	1562.53	0.82506	0.292005	2.8255	0.00472062	0.0480326	Up Regulated in Acute
ENSG00000137070.17	IL11RA	protein_coding	1069.06	-1.8452	0.33297	-5.54164	2.99651e-08	2.98874e-06	Down Regulated in Acute
ENSG00000137103.16	TMEM8B	protein_coding	130.901	-1.64225	0.385754	-4.25725	2.06958e-05	0.000713122	Down Regulated in Acute
ENSG00000137135.17	ARHGEF39	protein_coding	36.5958	2.86093	0.756771	3.78045	0.000156545	0.00365528	Up Regulated in Acute
ENSG00000137168.7	PPIL1	protein_coding	266.777	1.39025	0.355436	3.91138	9.17694e-05	0.00236586	Up Regulated in Acute
ENSG00000137198.9	GMPR	protein_coding	250.22	2.17538	0.472555	4.60344	4.15559e-06	0.000191846	Up Regulated in Acute
ENSG00000137265.14	IRF4	protein_coding	2858.99	2.24715	0.349094	6.43709	1.21783e-10	2.733e-08	Up Regulated in Acute
ENSG00000137310.11	TCF19	protein_coding	414.468	2.42549	0.548653	4.42081	9.83326e-06	0.000391344	Up Regulated in Acute
ENSG00000137331.11	IER3	protein_coding	294.162	-2.3084	0.426959	-5.40661	6.42276e-08	5.62278e-06	Down Regulated in Acute
ENSG00000137441.7	FGFBP2	protein_coding	1775.45	-1.57407	0.361221	-4.35762	1.31485e-05	0.00049293	Down Regulated in Acute
ENSG00000137502.9	RAB30	protein_coding	565.491	1.46027	0.359864	4.05784	4.95281e-05	0.00144977	Up Regulated in Acute
ENSG00000137507.11	LRRC32	protein_coding	20.4477	-3.67067	0.914796	-4.01255	6.00656e-05	0.00168205	Down Regulated in Acute
ENSG00000137563.11	GGH	protein_coding	304.611	3.5804	0.633964	5.64764	1.62668e-08	1.76876e-06	Up Regulated in Acute
ENSG00000137628.16	DDX60	protein_coding	916.628	2.11023	0.560779	3.76304	0.000167859	0.00389772	Up Regulated in Acute
ENSG00000137642.12	SORL1	protein_coding	4441.35	-1.75165	0.271513	-6.45145	1.10783e-10	2.55719e-08	Down Regulated in Acute
ENSG00000137801.10	THBS1	protein_coding	4668.41	-3.40607	1.05685	-3.22285	0.0012692	0.01878	Down Regulated in Acute
ENSG00000137804.12	NUSAP1	protein_coding	475.698	2.89867	0.473742	6.11868	9.43556e-10	1.63935e-07	Up Regulated in Acute
ENSG00000137806.8	NDUFAF1	protein_coding	385.288	1.36659	0.351103	3.89228	9.93083e-05	0.00251903	Up Regulated in Acute
ENSG00000137807.13	KIF23	protein_coding	194.119	3.68164	0.485181	7.58819	3.24417e-14	2.2791e-11	Up Regulated in Acute
ENSG00000137812.19	CASC5	protein_coding	158.962	3.64188	0.565453	6.44065	1.18965e-10	2.70738e-08	Up Regulated in Acute
ENSG00000137936.16	BCAR3	protein_coding	34.0282	3.26376	0.758245	4.30436	1.67469e-05	0.000602665	Up Regulated in Acute
ENSG00000137959.15	IFI44L	protein_coding	7089.92	3.46239	0.55276	6.26383	3.75638e-10	7.49329e-08	Up Regulated in Acute
ENSG00000137965.10	IFI44	protein_coding	5563.92	2.63994	0.474577	5.56272	2.65602e-08	2.66559e-06	Up Regulated in Acute
ENSG00000138035.14	PNPT1	protein_coding	694.746	1.26368	0.348167	3.62953	0.000283939	0.0058751	Up Regulated in Acute
ENSG00000138061.11	CYP1B1	protein_coding	1479.05	-1.92344	0.421801	-4.56007	5.11356e-06	0.000225751	Down Regulated in Acute
ENSG00000138073.13	PREB	protein_coding	1678.46	1.36638	0.326616	4.18345	2.87121e-05	0.000924164	Up Regulated in Acute
ENSG00000138160.5	KIF11	protein_coding	346.049	2.52002	0.465232	5.41669	6.07109e-08	5.41971e-06	Up Regulated in Acute
ENSG00000138166.5	DUSP5	protein_coding	1378.65	2.00916	0.411716	4.87997	1.061e-06	6.01534e-05	Up Regulated in Acute
ENSG00000138180.15	CEP55	protein_coding	145.792	3.62967	0.671934	5.40183	6.59649e-08	5.73043e-06	Up Regulated in Acute
ENSG00000138182.14	KIF20B	protein_coding	238.554	1.76537	0.351849	5.0174	5.23747e-07	3.39278e-05	Up Regulated in Acute
ENSG00000138346.14	DNA2	protein_coding	109.349	2.28732	0.573916	3.98547	6.73472e-05	0.00185067	Up Regulated in Acute
ENSG00000138385.15	SSB	protein_coding	1823.18	0.742473	0.240933	3.08165	0.00205854	0.0264614	Up Regulated in Acute
ENSG00000138413.13	IDH1	protein_coding	900.579	1.10388	0.273582	4.03491	5.46235e-05	0.0015649	Up Regulated in Acute
ENSG00000138439.11	FAM117B	protein_coding	267.961	-1.31	0.340905	-3.84271	0.000121686	0.00295668	Down Regulated in Acute
ENSG00000138463.8	DIRC2	protein_coding	212.489	-1.35079	0.370856	-3.64237	0.000270141	0.00566533	Down Regulated in Acute
ENSG00000138495.6	COX17	protein_coding	447.54	1.12247	0.399383	2.8105	0.00494646	0.0495812	Up Regulated in Acute
ENSG00000138496.16	PARP9	protein_coding	3779.25	1.6172	0.415077	3.89614	9.7737e-05	0.00249091	Up Regulated in Acute
ENSG00000138642.14	HERC6	protein_coding	900.73	1.36912	0.448328	3.05385	0.00225927	0.0284752	Up Regulated in Acute
ENSG00000138646.8	HERC5	protein_coding	1279.34	1.9333	0.460553	4.19779	2.69536e-05	0.000881613	Up Regulated in Acute
ENSG00000138674.16	SEC31A	protein_coding	1960.25	0.720473	0.253339	2.84391	0.00445642	0.0462471	Up Regulated in Acute
ENSG00000138709.17	LARP1B	protein_coding	386.2	1.04659	0.365335	2.86475	0.00417344	0.0439599	Up Regulated in Acute
ENSG00000138744.14	NAAA	protein_coding	1616.65	-0.811068	0.257326	-3.15191	0.00162208	0.0224589	Down Regulated in Acute
ENSG00000138755.5	CXCL9	protein_coding	23.4459	2.78533	0.966158	2.88289	0.00394043	0.042182	Up Regulated in Acute
ENSG00000138760.8	SCARB2	protein_coding	1793.91	0.887957	0.288694	3.07577	0.00209958	0.0268607	Up Regulated in Acute
ENSG00000138768.14	USO1	protein_coding	1453.14	1.39135	0.343318	4.05267	5.06363e-05	0.00147184	Up Regulated in Acute
ENSG00000138772.12	ANXA3	protein_coding	6.47206	4.26408	1.45684	2.92693	0.00342326	0.038226	Up Regulated in Acute
ENSG00000138778.11	CENPE	protein_coding	207.798	3.53299	0.574545	6.14919	7.78775e-10	1.39816e-07	Up Regulated in Acute
ENSG00000138795.9	LEF1	protein_coding	1309.47	-1.33353	0.335217	-3.97812	6.94619e-05	0.00188633	Down Regulated in Acute
ENSG00000139112.10	GABARAPL1	protein_coding	766.123	-1.60467	0.375476	-4.2737	1.92257e-05	0.00067386	Down Regulated in Acute
ENSG00000139163.15	ETNK1	protein_coding	771.443	1.17368	0.313196	3.74742	0.000178663	0.00404318	Up Regulated in Acute
ENSG00000139174.10	PRICKLE1	protein_coding	62.199	1.71786	0.556196	3.08858	0.00201115	0.0260177	Up Regulated in Acute
ENSG00000139192.11	TAPBPL	protein_coding	987.225	0.738861	0.253317	2.91674	0.00353706	0.0390915	Up Regulated in Acute
ENSG00000139193.3	CD27	protein_coding	1842.3	1.50152	0.459568	3.26724	0.00108603	0.0166966	Up Regulated in Acute
ENSG00000139266.5	MARCH9	protein_coding	690.944	-1.45362	0.450797	-3.22455	0.00126169	0.0187031	Down Regulated in Acute
ENSG00000139289.13	PHLDA1	protein_coding	65.5083	-1.73383	0.554255	-3.12822	0.00175867	0.0237995	Down Regulated in Acute
ENSG00000139567.12	ACVRL1	protein_coding	63.419	3.10896	0.655402	4.74359	2.09965e-06	0.000107361	Up Regulated in Acute
ENSG00000139618.14	BRCA2	protein_coding	243.509	2.04552	0.308975	6.62035	3.58339e-11	9.49186e-09	Up Regulated in Acute
ENSG00000139626.15	ITGB7	protein_coding	4570.11	1.07049	0.279043	3.8363	0.0001249	0.00301665	Up Regulated in Acute
ENSG00000139714.12	MORN3	protein_coding	103.088	-2.08814	0.537802	-3.88273	0.00010329	0.00260368	Down Regulated in Acute
ENSG00000139718.10	SETD1B	protein_coding	835.678	-1.26995	0.32422	-3.91693	8.96853e-05	0.00232233	Down Regulated in Acute
ENSG00000139734.17	DIAPH3	protein_coding	37.3312	3.63832	0.762004	4.77467	1.79999e-06	9.4266e-05	Up Regulated in Acute
ENSG00000139970.16	RTN1	protein_coding	268.485	-2.81355	0.485766	-5.79199	6.95573e-09	8.71246e-07	Down Regulated in Acute
ENSG00000140157.14	NIPA2	protein_coding	758.434	0.979795	0.313752	3.12284	0.00179117	0.024038	Up Regulated in Acute
ENSG00000140259.6	MFAP1	protein_coding	346.038	1.06742	0.303122	3.52143	0.000429231	0.00800867	Up Regulated in Acute
ENSG00000140284.10	SLC27A2	protein_coding	22.0864	2.59003	0.899261	2.88018	0.00397449	0.0423613	Up Regulated in Acute
ENSG00000140398.13	NEIL1	protein_coding	134.951	-1.39145	0.391959	-3.54998	0.00038526	0.00735819	Down Regulated in Acute
ENSG00000140443.13	IGF1R	protein_coding	259.661	-1.71366	0.427266	-4.01074	6.05282e-05	0.00168914	Down Regulated in Acute
ENSG00000140451.12	PIF1	protein_coding	132.946	2.63678	0.618338	4.2643	2.00534e-05	0.000696822	Up Regulated in Acute
ENSG00000140525.17	FANCI	protein_coding	579.872	2.20574	0.393933	5.59927	2.15253e-08	2.22952e-06	Up Regulated in Acute
ENSG00000140534.13	TICRR	protein_coding	67.2977	3.89812	0.699721	5.57097	2.53332e-08	2.55833e-06	Up Regulated in Acute
ENSG00000140650.11	PMM2	protein_coding	213.45	1.56761	0.410342	3.82025	0.000133315	0.00318656	Up Regulated in Acute
ENSG00000140688.16	C16orf58	protein_coding	943.319	0.694491	0.246251	2.82025	0.0047986	0.0486245	Up Regulated in Acute
ENSG00000140836.14	ZFHX3	protein_coding	211.859	-2.06847	0.364052	-5.68182	1.33271e-08	1.49541e-06	Down Regulated in Acute
ENSG00000140931.19	CMTM3	protein_coding	1301.21	-1.33885	0.269018	-4.97682	6.46367e-07	3.88253e-05	Down Regulated in Acute
ENSG00000141293.15	SKAP1	protein_coding	1072.45	-1.18546	0.358451	-3.30719	0.000942381	0.0150168	Down Regulated in Acute
ENSG00000141376.20	BCAS3	protein_coding	260.835	-1.07709	0.355492	-3.02986	0.00244669	0.0301323	Down Regulated in Acute
ENSG00000141384.11	TAF4B	protein_coding	185.942	1.48894	0.413674	3.59932	0.000319056	0.00638033	Up Regulated in Acute
ENSG00000141469.16	SLC14A1	protein_coding	155.772	-1.4033	0.427452	-3.28294	0.0010273	0.0160224	Down Regulated in Acute
ENSG00000141480.17	ARRB2	protein_coding	6215.08	-0.815042	0.232234	-3.50957	0.000448827	0.00829313	Down Regulated in Acute
ENSG00000141540.10	TTYH2	protein_coding	765.84	-1.05378	0.30708	-3.4316	0.000600028	0.0105498	Down Regulated in Acute
ENSG00000141582.14	CBX4	protein_coding	410.458	-1.15763	0.380792	-3.04005	0.00236539	0.0294452	Down Regulated in Acute
ENSG00000141627.13	DYM	protein_coding	690.666	-0.877135	0.257776	-3.4027	0.000667242	0.0114695	Down Regulated in Acute
ENSG00000141867.17	BRD4	protein_coding	1722.43	-1.22634	0.431368	-2.84292	0.00447027	0.0463087	Down Regulated in Acute
ENSG00000141905.17	NFIC	protein_coding	335.258	-1.86018	0.424375	-4.38334	1.16876e-05	0.000448571	Down Regulated in Acute
ENSG00000142089.15	IFITM3	protein_coding	7974.51	1.70764	0.457051	3.73621	0.000186814	0.00417503	Up Regulated in Acute
ENSG00000142102.15	ATHL1	protein_coding	3503.56	-1.4791	0.388604	-3.80619	0.000141123	0.00334349	Down Regulated in Acute
ENSG00000142156.14	COL6A1	protein_coding	21.6113	-3.00402	0.870707	-3.45009	0.000560401	0.00997242	Down Regulated in Acute
ENSG00000142173.14	COL6A2	protein_coding	225.894	-1.31725	0.442999	-2.97349	0.00294438	0.0342269	Down Regulated in Acute
ENSG00000142303.13	ADAMTS10	protein_coding	152.934	-1.62135	0.436903	-3.711	0.00020644	0.00452598	Down Regulated in Acute
ENSG00000142552.7	RCN3	protein_coding	146.568	-1.62729	0.542824	-2.99783	0.00271912	0.0324727	Down Regulated in Acute
ENSG00000142583.17	SLC2A5	protein_coding	333.183	1.71929	0.506292	3.39585	0.000684157	0.011698	Up Regulated in Acute
ENSG00000142675.17	CNKSR1	protein_coding	168.14	1.95618	0.487987	4.00867	6.10616e-05	0.00169816	Up Regulated in Acute
ENSG00000142731.10	PLK4	protein_coding	141.72	2.76765	0.52675	5.25419	1.4868e-07	1.13319e-05	Up Regulated in Acute
ENSG00000142945.12	KIF2C	protein_coding	260.084	3.61704	0.507875	7.1219	1.06446e-12	4.91415e-10	Up Regulated in Acute
ENSG00000143106.12	PSMA5	protein_coding	2567.57	1.00943	0.303172	3.32955	0.000869851	0.0141115	Up Regulated in Acute
ENSG00000143179.12	UCK2	protein_coding	285.157	1.13387	0.402149	2.81952	0.00480956	0.0486617	Up Regulated in Acute
ENSG00000143184.4	XCL1	protein_coding	61.4679	-1.45417	0.495556	-2.93441	0.00334178	0.0375497	Down Regulated in Acute
ENSG00000143185.3	XCL2	protein_coding	129.894	-1.29325	0.410155	-3.15307	0.00161562	0.0224079	Down Regulated in Acute
ENSG00000143228.12	NUF2	protein_coding	179.93	3.09096	0.564234	5.47815	4.29786e-08	4.0611e-06	Up Regulated in Acute
ENSG00000143297.18	FCRL5	protein_coding	901.98	2.26597	0.297559	7.61522	2.63236e-14	1.93335e-11	Up Regulated in Acute
ENSG00000143333.6	RGS16	protein_coding	38.348	4.06924	0.811096	5.01697	5.24939e-07	3.39278e-05	Up Regulated in Acute
ENSG00000143375.14	CGN	protein_coding	15.7982	4.44357	1.05717	4.20327	2.63084e-05	0.000864006	Up Regulated in Acute
ENSG00000143387.12	CTSK	protein_coding	268.913	-1.17244	0.414191	-2.83069	0.00464481	0.0475287	Down Regulated in Acute
ENSG00000143401.14	ANP32E	protein_coding	1101.75	1.13576	0.281566	4.03373	5.48974e-05	0.00156997	Up Regulated in Acute
ENSG00000143457.10	GOLPH3L	protein_coding	378.794	1.18422	0.342556	3.45701	0.000546203	0.0097635	Up Regulated in Acute
ENSG00000143476.17	DTL	protein_coding	191.913	3.17346	0.491354	6.4586	1.05674e-10	2.47462e-08	Up Regulated in Acute
ENSG00000143493.12	INTS7	protein_coding	397.873	1.37461	0.289228	4.75269	2.00732e-06	0.000103565	Up Regulated in Acute
ENSG00000143502.14	SUSD4	protein_coding	100.052	-1.89651	0.408761	-4.63965	3.48996e-06	0.000164405	Down Regulated in Acute
ENSG00000143507.17	DUSP10	protein_coding	214.75	-1.43318	0.388509	-3.68894	0.000225193	0.00488413	Down Regulated in Acute
ENSG00000143515.16	ATP8B2	protein_coding	1749.29	0.814454	0.269862	3.01803	0.0025442	0.030979	Up Regulated in Acute
ENSG00000143603.18	KCNN3	protein_coding	67.7285	4.05011	0.734913	5.511	3.56806e-08	3.43171e-06	Up Regulated in Acute
ENSG00000143614.7	GATAD2B	protein_coding	830.338	-0.931474	0.26186	-3.55715	0.000374898	0.00718576	Down Regulated in Acute
ENSG00000143772.9	ITPKB	protein_coding	1369.99	-1.60841	0.317543	-5.06517	4.0804e-07	2.74713e-05	Down Regulated in Acute
ENSG00000143799.12	PARP1	protein_coding	2686.75	1.09527	0.316261	3.4632	0.000533798	0.00959411	Up Regulated in Acute
ENSG00000143842.14	SOX13	protein_coding	100.015	-1.96551	0.588703	-3.33871	0.000841673	0.0137094	Down Regulated in Acute
ENSG00000143870.12	PDIA6	protein_coding	5068.57	1.79193	0.34134	5.24968	1.52364e-07	1.15582e-05	Up Regulated in Acute
ENSG00000143891.16	GALM	protein_coding	607.401	1.11155	0.34171	3.25289	0.00114237	0.0173481	Up Regulated in Acute
ENSG00000143942.4	CHAC2	protein_coding	124.385	4.19537	0.661696	6.34033	2.29274e-10	4.74949e-08	Up Regulated in Acute
ENSG00000144045.13	DQX1	protein_coding	15.6083	4.96223	1.14814	4.32198	1.54637e-05	0.000562754	Up Regulated in Acute
ENSG00000144354.13	CDCA7	protein_coding	166.428	2.14766	0.37621	5.70869	1.1385e-08	1.29548e-06	Up Regulated in Acute
ENSG00000144381.16	HSPD1	protein_coding	2859.85	1.02309	0.339025	3.01775	0.00254662	0.0309851	Up Regulated in Acute
ENSG00000144395.17	CCDC150	protein_coding	43.7365	3.25536	0.751302	4.33296	1.47116e-05	0.000542717	Up Regulated in Acute
ENSG00000144504.15	ANKMY1	protein_coding	384.738	-1.13936	0.340246	-3.34863	0.000812113	0.0133763	Down Regulated in Acute
ENSG00000144579.7	CTDSP1	protein_coding	2559.11	-0.84347	0.281927	-2.99181	0.00277333	0.0328771	Down Regulated in Acute
ENSG00000144591.17	GMPPA	protein_coding	981.137	1.04138	0.327248	3.18223	0.00146146	0.0207324	Up Regulated in Acute
ENSG00000144711.13	IQSEC1	protein_coding	2539	-1.02905	0.295364	-3.48402	0.000493945	0.00897769	Down Regulated in Acute
ENSG00000144744.16	UBA3	protein_coding	1381.58	0.861452	0.282348	3.05103	0.00228061	0.0286659	Up Regulated in Acute
ENSG00000144749.13	LRIG1	protein_coding	438.128	-1.38347	0.356014	-3.88601	0.000101903	0.00257274	Down Regulated in Acute
ENSG00000144824.19	PHLDB2	protein_coding	60.9488	-1.55492	0.511898	-3.03755	0.00238509	0.0296448	Down Regulated in Acute
ENSG00000145020.14	AMT	protein_coding	301.296	-0.874	0.292223	-2.99087	0.00278183	0.0329537	Down Regulated in Acute
ENSG00000145050.15	MANF	protein_coding	1925.14	1.86233	0.495622	3.75757	0.000171571	0.0039547	Up Regulated in Acute
ENSG00000145075.11	CCDC39	protein_coding	10.6047	5.33153	1.6339	3.26307	0.00110212	0.0168685	Up Regulated in Acute
ENSG00000145088.8	EAF2	protein_coding	1222.37	2.51723	0.430365	5.84907	4.94341e-09	6.39005e-07	Up Regulated in Acute
ENSG00000145103.12	ILDR1	protein_coding	18.5672	3.08668	1.02477	3.01206	0.00259484	0.0313594	Up Regulated in Acute
ENSG00000145284.11	SCD5	protein_coding	33.8493	-1.89654	0.625375	-3.03265	0.00242414	0.0300018	Down Regulated in Acute
ENSG00000145287.10	PLAC8	protein_coding	4680.21	1.48472	0.32895	4.51352	6.37611e-06	0.000271119	Up Regulated in Acute
ENSG00000145365.10	TIFA	protein_coding	422.978	2.04034	0.409731	4.97971	6.36802e-07	3.8422e-05	Up Regulated in Acute
ENSG00000145386.9	CCNA2	protein_coding	229.429	2.77132	0.583172	4.75216	2.01259e-06	0.000103565	Up Regulated in Acute
ENSG00000145425.9	RPS3A	protein_coding	47463.3	-1.2359	0.438993	-2.8153	0.00487321	0.0491212	Down Regulated in Acute
ENSG00000145431.10	PDGFC	protein_coding	73.1908	-1.98348	0.497793	-3.98455	6.76074e-05	0.00185467	Down Regulated in Acute
ENSG00000145817.16	YIPF5	protein_coding	497.613	1.08833	0.322342	3.37632	0.000734615	0.0123903	Up Regulated in Acute
ENSG00000145819.15	ARHGAP26	protein_coding	1469.09	-1.07732	0.28739	-3.74863	0.000177802	0.00403171	Down Regulated in Acute
ENSG00000145979.17	TBC1D7	protein_coding	175.832	1.19545	0.368326	3.24563	0.00117192	0.0176971	Up Regulated in Acute
ENSG00000145990.10	GFOD1	protein_coding	355.185	-1.31174	0.363519	-3.60845	0.000308032	0.00623707	Down Regulated in Acute
ENSG00000146021.14	KLHL3	protein_coding	193.36	-1.90465	0.401722	-4.74123	2.12428e-06	0.000108278	Down Regulated in Acute
ENSG00000146070.16	PLA2G7	protein_coding	285.174	-1.31036	0.33358	-3.92817	8.55956e-05	0.00224158	Down Regulated in Acute
ENSG00000146278.10	PNRC1	protein_coding	1696.93	-1.05967	0.302419	-3.50397	0.00045837	0.00843548	Down Regulated in Acute
ENSG00000146376.10	ARHGAP18	protein_coding	287.404	1.32263	0.369973	3.57494	0.000350309	0.00684437	Up Regulated in Acute
ENSG00000146409.10	SLC18B1	protein_coding	410.161	-1.05784	0.29917	-3.53594	0.000406334	0.00770604	Down Regulated in Acute
ENSG00000146410.11	MTFR2	protein_coding	85.7717	2.25329	0.59775	3.76962	0.000163496	0.00381207	Up Regulated in Acute
ENSG00000146476.10	ARMT1	protein_coding	266.538	1.7053	0.582374	2.92818	0.00340954	0.0381255	Up Regulated in Acute
ENSG00000146535.13	GNA12	protein_coding	443.751	-0.969166	0.336923	-2.87652	0.00402089	0.0427431	Down Regulated in Acute
ENSG00000146670.9	CDCA5	protein_coding	302.555	3.00648	0.46356	6.48563	8.83591e-11	2.09957e-08	Up Regulated in Acute
ENSG00000146674.14	IGFBP3	protein_coding	99.2163	-1.82035	0.566229	-3.21486	0.0013051	0.0191882	Down Regulated in Acute
ENSG00000146733.13	PSPH	protein_coding	73.3936	1.78793	0.554279	3.22569	0.00125672	0.0186808	Up Regulated in Acute
ENSG00000146834.13	MEPCE	protein_coding	773.669	-0.935308	0.321046	-2.91332	0.00357609	0.0393613	Down Regulated in Acute
ENSG00000146918.19	NCAPG2	protein_coding	310.787	1.42313	0.366842	3.87941	0.000104711	0.0026203	Up Regulated in Acute
ENSG00000147324.10	MFHAS1	protein_coding	506.441	-1.35599	0.332607	-4.07685	4.56495e-05	0.00135092	Down Regulated in Acute
ENSG00000147535.16	PPAPDC1B	protein_coding	975.923	1.05951	0.3601	2.94226	0.00325827	0.0368677	Up Regulated in Acute
ENSG00000147576.15	ADHFE1	protein_coding	296.306	-1.24997	0.354657	-3.52445	0.000424358	0.00793609	Down Regulated in Acute
ENSG00000147592.8	LACTB2	protein_coding	101.965	2.07856	0.5278	3.93817	8.21066e-05	0.00216424	Up Regulated in Acute
ENSG00000147889.16	CDKN2A	protein_coding	50.2185	2.39634	0.616256	3.88855	0.000100847	0.00255005	Up Regulated in Acute
ENSG00000148346.11	LCN2	protein_coding	19.259	2.69393	0.928427	2.90161	0.00371248	0.0403676	Up Regulated in Acute
ENSG00000148411.7	NACC2	protein_coding	632.223	-1.1069	0.309934	-3.5714	0.000355078	0.00691247	Down Regulated in Acute
ENSG00000148600.14	CDHR1	protein_coding	54.3039	-2.48048	0.797867	-3.10889	0.00187794	0.0248312	Down Regulated in Acute
ENSG00000148660.20	CAMK2G	protein_coding	931.96	-0.878667	0.299398	-2.93478	0.00333784	0.0375315	Down Regulated in Acute
ENSG00000148773.12	MKI67	protein_coding	1360.75	3.42656	0.427958	8.00676	1.17767e-15	1.46375e-12	Up Regulated in Acute
ENSG00000148926.9	ADM	protein_coding	242.039	1.40389	0.474455	2.95895	0.00308689	0.0354498	Up Regulated in Acute
ENSG00000149054.14	ZNF215	protein_coding	55.1578	4.11664	0.838355	4.91038	9.09023e-07	5.24571e-05	Up Regulated in Acute
ENSG00000149131.15	SERPING1	protein_coding	1410.32	3.59795	0.629151	5.71874	1.07316e-08	1.23857e-06	Up Regulated in Acute
ENSG00000149212.10	SESN3	protein_coding	916.309	-1.23966	0.368535	-3.36376	0.000768881	0.0128608	Down Regulated in Acute
ENSG00000149260.14	CAPN5	protein_coding	54.4337	-2.32858	0.567677	-4.10194	4.09695e-05	0.00123275	Down Regulated in Acute
ENSG00000149294.16	NCAM1	protein_coding	237.514	-1.25999	0.380336	-3.31283	0.000923587	0.0147609	Down Regulated in Acute
ENSG00000149428.18	HYOU1	protein_coding	2623.23	1.87508	0.306726	6.11321	9.76487e-10	1.67852e-07	Up Regulated in Acute
ENSG00000149554.12	CHEK1	protein_coding	192.223	2.73488	0.649048	4.21368	2.51245e-05	0.000830188	Up Regulated in Acute
ENSG00000149636.15	DSN1	protein_coding	394.966	1.23812	0.361101	3.42874	0.000606383	0.010588	Up Regulated in Acute
ENSG00000150054.18	MPP7	protein_coding	296.635	-1.14576	0.360657	-3.17686	0.0014888	0.021028	Down Regulated in Acute
ENSG00000150093.18	ITGB1	protein_coding	3675.65	1.15927	0.408523	2.83772	0.00454376	0.0468228	Up Regulated in Acute
ENSG00000150337.13	FCGR1A	protein_coding	1190.74	1.92265	0.320772	5.99381	2.04976e-09	3.16355e-07	Up Regulated in Acute
ENSG00000150593.15	PDCD4	protein_coding	2574.71	-0.970055	0.290635	-3.3377	0.000844735	0.0137454	Down Regulated in Acute
ENSG00000150681.9	RGS18	protein_coding	661.635	1.44242	0.42595	3.38637	0.000708239	0.0120334	Up Regulated in Acute
ENSG00000150687.11	PRSS23	protein_coding	295.157	-1.93202	0.312538	-6.18172	6.34073e-10	1.17763e-07	Down Regulated in Acute
ENSG00000150867.13	PIP4K2A	protein_coding	2419.05	-0.79655	0.261316	-3.04823	0.00230197	0.0288112	Down Regulated in Acute
ENSG00000150907.6	FOXO1	protein_coding	794.71	-1.13223	0.273017	-4.1471	3.36714e-05	0.00104829	Down Regulated in Acute
ENSG00000150961.14	SEC24D	protein_coding	929.775	1.73826	0.303399	5.7293	1.00845e-08	1.18077e-06	Up Regulated in Acute
ENSG00000150967.17	ABCB9	protein_coding	189.547	2.05752	0.558887	3.68146	0.000231901	0.00499609	Up Regulated in Acute
ENSG00000151012.13	SLC7A11	protein_coding	43.9032	2.45607	0.790341	3.10761	0.00188604	0.0248569	Up Regulated in Acute
ENSG00000151136.14	BTBD11	protein_coding	193.634	-1.31141	0.357246	-3.67089	0.000241704	0.00516594	Down Regulated in Acute
ENSG00000151208.16	DLG5	protein_coding	121.794	-1.62175	0.502514	-3.22728	0.00124974	0.0186114	Down Regulated in Acute
ENSG00000151247.12	EIF4E	protein_coding	439.559	1.24846	0.310802	4.01689	5.89706e-05	0.00165712	Up Regulated in Acute
ENSG00000151364.15	KCTD14	protein_coding	127.274	6.98156	0.828669	8.42503	3.60646e-17	5.82733e-14	Up Regulated in Acute
ENSG00000151491.12	EPS8	protein_coding	69.7165	-2.06516	0.56083	-3.68233	0.000231115	0.00498579	Down Regulated in Acute
ENSG00000151575.14	TEX9	protein_coding	62.7341	2.39701	0.72728	3.29586	0.000981202	0.0154676	Up Regulated in Acute
ENSG00000151623.14	NR3C2	protein_coding	139.376	-1.36734	0.442351	-3.09107	0.00199439	0.0259046	Down Regulated in Acute
ENSG00000151650.7	VENTX	protein_coding	227.177	-2.34935	0.553926	-4.24127	2.22259e-05	0.000749741	Down Regulated in Acute
ENSG00000151692.14	RNF144A	protein_coding	177.669	-1.28737	0.385086	-3.34306	0.000828586	0.0135784	Down Regulated in Acute
ENSG00000151725.11	CENPU	protein_coding	214.282	2.52519	0.64463	3.91727	8.95586e-05	0.00232233	Up Regulated in Acute
ENSG00000151893.14	CACUL1	protein_coding	972.551	-0.93625	0.271136	-3.45307	0.000554251	0.00989568	Down Regulated in Acute
ENSG00000152253.8	SPC25	protein_coding	67.1829	4.62113	0.722423	6.39671	1.58757e-10	3.46648e-08	Up Regulated in Acute
ENSG00000152455.15	SUV39H2	protein_coding	72.5573	1.67359	0.5678	2.9475	0.00320356	0.0364016	Up Regulated in Acute
ENSG00000152465.17	NMT2	protein_coding	246.372	-1.29674	0.333219	-3.89155	9.9605e-05	0.0025226	Down Regulated in Acute
ENSG00000152495.10	CAMK4	protein_coding	660.597	-1.34704	0.300487	-4.48284	7.36549e-06	0.000309926	Down Regulated in Acute
ENSG00000152518.6	ZFP36L2	protein_coding	6752.2	-1.27385	0.289304	-4.40315	1.06692e-05	0.000414149	Down Regulated in Acute
ENSG00000152684.10	PELO	protein_coding	158.195	1.18036	0.416746	2.83233	0.00462097	0.0474068	Up Regulated in Acute
ENSG00000152689.17	RASGRP3	protein_coding	673.177	1.63105	0.409835	3.97978	6.8978e-05	0.00188268	Up Regulated in Acute
ENSG00000152700.13	SAR1B	protein_coding	1076.24	1.06754	0.299248	3.56742	0.000360515	0.00697707	Up Regulated in Acute
ENSG00000152766.5	ANKRD22	protein_coding	386.233	3.78282	0.478332	7.90836	2.60791e-15	3.0099e-12	Up Regulated in Acute
ENSG00000152953.12	STK32B	protein_coding	9.55566	-3.71412	1.30197	-2.85269	0.00433511	0.0453084	Down Regulated in Acute
ENSG00000153066.12	TXNDC11	protein_coding	2910.21	2.01766	0.393129	5.13232	2.86196e-07	2.01059e-05	Up Regulated in Acute
ENSG00000153093.18	ACOXL	protein_coding	24.168	4.21373	1.14502	3.68006	0.000233179	0.00501692	Up Regulated in Acute
ENSG00000153162.8	BMP6	protein_coding	100.525	3.69185	0.716951	5.14937	2.6136e-07	1.85222e-05	Up Regulated in Acute
ENSG00000153208.16	MERTK	protein_coding	220.817	1.62241	0.573188	2.8305	0.00464756	0.0475287	Up Regulated in Acute
ENSG00000153234.13	NR4A2	protein_coding	502.966	-3.44533	0.607914	-5.66746	1.44932e-08	1.59307e-06	Down Regulated in Acute
ENSG00000153283.12	CD96	protein_coding	1570.01	-1.22443	0.323256	-3.78779	0.000151995	0.00356967	Down Regulated in Acute
ENSG00000153395.9	LPCAT1	protein_coding	2472.59	-0.964026	0.33689	-2.86154	0.00421582	0.0443196	Down Regulated in Acute
ENSG00000153786.12	ZDHHC7	protein_coding	1964.82	-0.855362	0.257476	-3.3221	0.000893418	0.0144214	Down Regulated in Acute
ENSG00000153814.11	JAZF1	protein_coding	630.474	-1.17947	0.274352	-4.29911	1.71482e-05	0.00061437	Down Regulated in Acute
ENSG00000153815.16	CMIP	protein_coding	1258.91	-1.41753	0.370789	-3.82302	0.000131829	0.00316037	Down Regulated in Acute
ENSG00000153823.18	PID1	protein_coding	309.039	-1.40515	0.499764	-2.81163	0.00492917	0.0494692	Down Regulated in Acute
ENSG00000153885.14	KCTD15	protein_coding	164.166	-1.29191	0.361489	-3.57384	0.000351781	0.00685942	Down Regulated in Acute
ENSG00000153989.7	NUS1	protein_coding	812.143	0.979346	0.270757	3.61706	0.000297966	0.00610981	Up Regulated in Acute
ENSG00000154027.18	AK5	protein_coding	100.655	-1.68973	0.396988	-4.25638	2.07761e-05	0.000713122	Down Regulated in Acute
ENSG00000154122.12	ANKH	protein_coding	407.331	-1.24787	0.336818	-3.70489	0.000211482	0.00461773	Down Regulated in Acute
ENSG00000154134.14	ROBO3	protein_coding	96.3887	-1.55646	0.522277	-2.98014	0.00288115	0.0336372	Down Regulated in Acute
ENSG00000154153.13	FAM134B	protein_coding	217.559	-1.21796	0.39674	-3.06993	0.00214111	0.0273055	Down Regulated in Acute
ENSG00000154217.14	PITPNC1	protein_coding	765.009	-1.22315	0.288756	-4.23593	2.27611e-05	0.000763015	Down Regulated in Acute
ENSG00000154229.11	PRKCA	protein_coding	496.746	-1.02774	0.35297	-2.91168	0.00359486	0.0395141	Down Regulated in Acute
ENSG00000154277.12	UCHL1	protein_coding	52.5179	5.36136	0.808941	6.62763	3.41121e-11	9.1864e-09	Up Regulated in Acute
ENSG00000154358.19	OBSCN	protein_coding	229.491	-1.25674	0.428814	-2.93075	0.00338149	0.0378643	Down Regulated in Acute
ENSG00000154511.11	FAM69A	protein_coding	432.902	1.93902	0.346408	5.5975	2.17466e-08	2.2381e-06	Up Regulated in Acute
ENSG00000154611.14	PSMA8	protein_coding	21.6127	2.32453	0.791569	2.93661	0.00331823	0.0373891	Up Regulated in Acute
ENSG00000154642.10	C21orf91	protein_coding	443.343	1.27855	0.301944	4.2344	2.29159e-05	0.000766616	Up Regulated in Acute
ENSG00000154764.5	WNT7A	protein_coding	34.5877	-2.17019	0.657453	-3.30091	0.000963718	0.0152305	Down Regulated in Acute
ENSG00000154813.9	DPH3	protein_coding	335.538	1.1468	0.325148	3.52701	0.000420288	0.00790316	Up Regulated in Acute
ENSG00000154839.9	SKA1	protein_coding	113.383	3.93948	0.533008	7.39104	1.4569e-13	9.41625e-11	Up Regulated in Acute
ENSG00000154920.14	EME1	protein_coding	80.9848	3.88103	0.621154	6.2481	4.1548e-10	8.18699e-08	Up Regulated in Acute
ENSG00000155189.11	AGPAT5	protein_coding	263.027	1.02465	0.334935	3.05924	0.00221899	0.0280991	Up Regulated in Acute
ENSG00000155265.10	GOLGA7B	protein_coding	251.6	-1.46487	0.321716	-4.5533	5.28102e-06	0.000230623	Down Regulated in Acute
ENSG00000155366.16	RHOC	protein_coding	537.103	-1.70366	0.352195	-4.83728	1.31631e-06	7.23433e-05	Down Regulated in Acute
ENSG00000155380.11	SLC16A1	protein_coding	279.528	1.49931	0.531363	2.82164	0.00477791	0.0484629	Up Regulated in Acute
ENSG00000155657.23	TTN	protein_coding	273.247	-1.83018	0.483414	-3.78595	0.00015312	0.00359087	Down Regulated in Acute
ENSG00000155660.10	PDIA4	protein_coding	4323.3	2.62965	0.361197	7.28038	3.32876e-13	1.76359e-10	Up Regulated in Acute
ENSG00000155761.13	SPAG17	protein_coding	12.9309	-3.16754	1.11196	-2.84861	0.00439102	0.0457743	Down Regulated in Acute
ENSG00000156030.12	ELMSAN1	protein_coding	994.667	-1.25221	0.430687	-2.90748	0.00364356	0.0398521	Down Regulated in Acute
ENSG00000156253.6	RWDD2B	protein_coding	204.038	1.38098	0.37148	3.7175	0.000201208	0.00445969	Up Regulated in Acute
ENSG00000156299.12	TIAM1	protein_coding	677.938	-1.67973	0.290488	-5.78245	7.36216e-09	9.01195e-07	Down Regulated in Acute
ENSG00000156587.15	UBE2L6	protein_coding	3881.81	0.963721	0.301134	3.20031	0.00137281	0.0199298	Up Regulated in Acute
ENSG00000156802.12	ATAD2	protein_coding	535.219	1.51163	0.313117	4.82768	1.38135e-06	7.4899e-05	Up Regulated in Acute
ENSG00000156804.7	FBXO32	protein_coding	302.243	-1.3245	0.328429	-4.03283	5.51095e-05	0.00157325	Down Regulated in Acute
ENSG00000156869.12	FRRS1	protein_coding	46.8541	3.21296	0.886909	3.62265	0.000291599	0.00600211	Up Regulated in Acute
ENSG00000156876.9	SASS6	protein_coding	104.417	1.63349	0.466915	3.49848	0.000467921	0.00857219	Up Regulated in Acute
ENSG00000156958.14	GALK2	protein_coding	372.231	1.18277	0.33038	3.58005	0.000343533	0.00675281	Up Regulated in Acute
ENSG00000156966.6	B3GNT7	protein_coding	63.1173	-3.26123	0.545157	-5.98219	2.20154e-09	3.32422e-07	Down Regulated in Acute
ENSG00000156970.12	BUB1B	protein_coding	136.628	3.43072	0.722461	4.74866	2.04768e-06	0.000105036	Up Regulated in Acute
ENSG00000157017.15	GHRL	protein_coding	55.9457	-2.12051	0.586968	-3.61265	0.000303081	0.00618331	Down Regulated in Acute
ENSG00000157168.18	NRG1	protein_coding	241.252	-3.15395	0.509692	-6.18794	6.09552e-10	1.14525e-07	Down Regulated in Acute
ENSG00000157404.15	KIT	protein_coding	21.6108	-4.03951	1.15579	-3.49501	0.00047404	0.00867444	Down Regulated in Acute
ENSG00000157445.14	CACNA2D3	protein_coding	112.196	-2.29433	0.42144	-5.44403	5.20895e-08	4.83713e-06	Down Regulated in Acute
ENSG00000157456.7	CCNB2	protein_coding	269.391	4.00495	1.09667	3.65193	0.000260275	0.00548309	Up Regulated in Acute
ENSG00000157514.16	TSC22D3	protein_coding	7761.31	-1.59365	0.382641	-4.16486	3.11541e-05	0.000983178	Down Regulated in Acute
ENSG00000157570.11	TSPAN18	protein_coding	166.511	-1.85052	0.419508	-4.41118	1.0281e-05	0.000404186	Down Regulated in Acute
ENSG00000157601.13	MX1	protein_coding	7536.59	2.46264	0.458652	5.3693	7.90422e-08	6.72191e-06	Up Regulated in Acute
ENSG00000157734.13	SNX22	protein_coding	245.093	-1.89178	0.47805	-3.95728	7.58082e-05	0.00203413	Down Regulated in Acute
ENSG00000157837.15	SPPL3	protein_coding	807.32	-1.06312	0.35632	-2.98361	0.00284872	0.0334275	Down Regulated in Acute
ENSG00000157933.9	SKI	protein_coding	392.685	-1.14922	0.342694	-3.3535	0.000797967	0.0132242	Down Regulated in Acute
ENSG00000158089.14	GALNT14	protein_coding	21.4203	3.6885	1.08823	3.38946	0.000700312	0.0119112	Up Regulated in Acute
ENSG00000158292.6	GPR153	protein_coding	49.6798	-2.80218	0.738618	-3.79381	0.000148351	0.00349426	Down Regulated in Acute
ENSG00000158321.15	AUTS2	protein_coding	271.485	-1.33773	0.46242	-2.89288	0.00381728	0.0413403	Down Regulated in Acute
ENSG00000158373.8	HIST1H2BD	protein_coding	104.688	2.34389	0.560752	4.1799	2.91631e-05	0.00093126	Up Regulated in Acute
ENSG00000158402.18	CDC25C	protein_coding	45.6535	4.96838	0.845697	5.87489	4.23127e-09	5.55844e-07	Up Regulated in Acute
ENSG00000158406.3	HIST1H4H	protein_coding	28.3637	4.27558	0.970862	4.4039	1.06321e-05	0.000413959	Up Regulated in Acute
ENSG00000158457.5	TSPAN33	protein_coding	435.499	-1.21424	0.376822	-3.22231	0.00127163	0.0187986	Down Regulated in Acute
ENSG00000158481.12	CD1C	protein_coding	397.609	-1.79703	0.350316	-5.12973	2.90152e-07	2.0142e-05	Down Regulated in Acute
ENSG00000158717.10	RNF166	protein_coding	1519.32	-1.01981	0.297857	-3.42384	0.000617431	0.0107621	Down Regulated in Acute
ENSG00000158769.17	F11R	protein_coding	514.002	-0.779139	0.275183	-2.83135	0.0046352	0.0474924	Down Regulated in Acute
ENSG00000159063.12	ALG8	protein_coding	400.653	1.05607	0.372971	2.83149	0.00463311	0.0474924	Up Regulated in Acute
ENSG00000159131.16	GART	protein_coding	855.812	1.33585	0.274462	4.86716	1.13213e-06	6.26999e-05	Up Regulated in Acute
ENSG00000159147.17	DONSON	protein_coding	216.051	1.13851	0.402671	2.82739	0.00469292	0.0478411	Up Regulated in Acute
ENSG00000159189.11	C1QC	protein_coding	182.312	5.79828	0.823908	7.03753	1.95682e-12	7.90456e-10	Up Regulated in Acute
ENSG00000159228.12	CBR1	protein_coding	555.22	1.63232	0.367836	4.43762	9.09572e-06	0.000370198	Up Regulated in Acute
ENSG00000159433.11	STARD9	protein_coding	174.293	-1.29893	0.445743	-2.91407	0.00356752	0.0393428	Down Regulated in Acute
ENSG00000159461.14	AMFR	protein_coding	1000.14	-0.77217	0.246231	-3.13596	0.00171293	0.0233662	Down Regulated in Acute
ENSG00000159713.10	TPPP3	protein_coding	143.546	-1.86252	0.42444	-4.38819	1.14299e-05	0.000441829	Down Regulated in Acute
ENSG00000159733.13	ZFYVE28	protein_coding	199.639	-1.19435	0.404815	-2.95037	0.00317397	0.0361926	Down Regulated in Acute
ENSG00000159873.9	CCDC117	protein_coding	565.326	1.01709	0.335675	3.02998	0.00244571	0.0301323	Up Regulated in Acute
ENSG00000159958.4	TNFRSF13C	protein_coding	596.704	-1.9814	0.330726	-5.99105	2.08488e-09	3.17807e-07	Down Regulated in Acute
ENSG00000160094.14	ZNF362	protein_coding	323.44	-1.34967	0.349544	-3.86122	0.000112821	0.00277467	Down Regulated in Acute
ENSG00000160593.17	AMICA1	protein_coding	9897.5	-0.808319	0.284422	-2.84197	0.00448356	0.0464079	Down Regulated in Acute
ENSG00000160683.4	CXCR5	protein_coding	235.736	-2.26913	0.323143	-7.02207	2.18602e-12	8.61507e-10	Down Regulated in Acute
ENSG00000160789.19	LMNA	protein_coding	163.065	-1.14527	0.359416	-3.18647	0.00144021	0.0205392	Down Regulated in Acute
ENSG00000160791.13	CCR5	protein_coding	829.092	1.70143	0.3263	5.2143	1.84515e-07	1.37392e-05	Up Regulated in Acute
ENSG00000160856.20	FCRL3	protein_coding	836.398	-1.20897	0.325462	-3.71462	0.000203506	0.00448601	Down Regulated in Acute
ENSG00000160908.14	ZNF394	protein_coding	1053.46	-1.05556	0.340049	-3.10413	0.00190842	0.0250877	Down Regulated in Acute
ENSG00000160932.10	LY6E	protein_coding	4453.53	1.55504	0.418791	3.71317	0.000204683	0.00449967	Up Regulated in Acute
ENSG00000160957.12	RECQL4	protein_coding	123.158	1.9647	0.615899	3.18997	0.00142289	0.0204547	Up Regulated in Acute
ENSG00000160999.10	SH2B2	protein_coding	167.479	1.72202	0.348619	4.93956	7.82993e-07	4.60058e-05	Up Regulated in Acute
ENSG00000161057.10	PSMC2	protein_coding	1755.07	1.2942	0.29667	4.36241	1.28637e-05	0.000484503	Up Regulated in Acute
ENSG00000161381.13	PLXDC1	protein_coding	269.73	-2.03813	0.307209	-6.63434	3.25965e-11	8.92703e-09	Down Regulated in Acute
ENSG00000161640.15	SIGLEC11	protein_coding	44.1905	3.37484	0.860073	3.9239	8.71253e-05	0.00227795	Up Regulated in Acute
ENSG00000161642.17	ZNF385A	protein_coding	1433.4	-1.25637	0.393391	-3.19368	0.0014047	0.0202628	Down Regulated in Acute
ENSG00000161791.13	FMNL3	protein_coding	528.745	-1.07738	0.31612	-3.40812	0.000654113	0.0112678	Down Regulated in Acute
ENSG00000161800.12	RACGAP1	protein_coding	353.657	2.03935	0.572297	3.56345	0.000366017	0.00704899	Up Regulated in Acute
ENSG00000161813.20	LARP4	protein_coding	395.175	1.63624	0.369855	4.42401	9.68852e-06	0.000387493	Up Regulated in Acute
ENSG00000161835.10	GRASP	protein_coding	251.158	-3.24555	0.545225	-5.95267	2.63801e-09	3.73903e-07	Down Regulated in Acute
ENSG00000161888.11	SPC24	protein_coding	90.3825	2.18433	0.701037	3.11586	0.00183411	0.0244316	Up Regulated in Acute
ENSG00000161921.14	CXCL16	protein_coding	702.473	-1.75021	0.380314	-4.602	4.18457e-06	0.000192086	Down Regulated in Acute
ENSG00000161980.5	POLR3K	protein_coding	224.373	1.12744	0.35023	3.21913	0.00128578	0.0189732	Up Regulated in Acute
ENSG00000162062.14	C16orf59	protein_coding	19.2906	4.94537	1.01187	4.88738	1.02186e-06	5.8138e-05	Up Regulated in Acute
ENSG00000162129.12	CLPB	protein_coding	231.288	1.00079	0.333695	2.99911	0.00270773	0.0323845	Up Regulated in Acute
ENSG00000162298.16	SYVN1	protein_coding	1329.21	0.922721	0.281954	3.27259	0.00106566	0.0165091	Up Regulated in Acute
ENSG00000162415.6	ZSWIM5	protein_coding	42.9701	-1.86717	0.631089	-2.95865	0.00308989	0.0354591	Down Regulated in Acute
ENSG00000162430.16	SEPN1	protein_coding	581.559	-1.32839	0.341267	-3.89253	9.92025e-05	0.00251903	Down Regulated in Acute
ENSG00000162496.8	DHRS3	protein_coding	391.966	-2.38016	0.447132	-5.32318	1.01968e-07	8.36345e-06	Down Regulated in Acute
ENSG00000162511.7	LAPTM5	protein_coding	22468.3	-0.902106	0.287997	-3.13234	0.00173417	0.0235261	Down Regulated in Acute
ENSG00000162512.15	SDC3	protein_coding	244.583	2.62501	0.686776	3.82223	0.000132251	0.0031658	Up Regulated in Acute
ENSG00000162591.15	MEGF6	protein_coding	99.4014	-1.94244	0.616651	-3.14998	0.00163283	0.0225884	Down Regulated in Acute
ENSG00000162599.15	NFIA	protein_coding	116.57	-1.77194	0.572786	-3.09354	0.00197782	0.02571	Down Regulated in Acute
ENSG00000162614.18	NEXN	protein_coding	345.27	2.6781	0.478724	5.59426	2.2157e-08	2.26591e-06	Up Regulated in Acute
ENSG00000162733.16	DDR2	protein_coding	52.4656	3.43765	0.690997	4.97491	6.52766e-07	3.89424e-05	Up Regulated in Acute
ENSG00000162747.9	FCGR3B	protein_coding	294.748	3.278	1.16481	2.8142	0.00488986	0.049197	Up Regulated in Acute
ENSG00000162804.13	SNED1	protein_coding	112.393	-1.70951	0.519457	-3.29095	0.000998481	0.0157093	Down Regulated in Acute
ENSG00000162813.17	BPNT1	protein_coding	293.05	1.22198	0.351997	3.47157	0.000517428	0.00936237	Up Regulated in Acute
ENSG00000162894.11	FCMR	protein_coding	2382.66	-0.76852	0.249472	-3.08058	0.00206598	0.0265147	Down Regulated in Acute
ENSG00000163050.16	ADCK3	protein_coding	856.583	-1.03628	0.287283	-3.60719	0.000309533	0.00625962	Down Regulated in Acute
ENSG00000163053.10	SLC16A14	protein_coding	90.418	3.28817	0.752016	4.37248	1.22845e-05	0.000467041	Up Regulated in Acute
ENSG00000163170.11	BOLA3	protein_coding	147.234	1.44983	0.466501	3.10789	0.0018843	0.0248569	Up Regulated in Acute
ENSG00000163235.15	TGFA	protein_coding	37.1156	-2.54726	0.740359	-3.44057	0.000580493	0.0102686	Down Regulated in Acute
ENSG00000163319.10	MRPS18C	protein_coding	586.579	1.27888	0.320515	3.99007	6.60547e-05	0.00182558	Up Regulated in Acute
ENSG00000163362.10	C1orf106	protein_coding	10.4375	4.55532	1.25469	3.63065	0.000282713	0.00587156	Up Regulated in Acute
ENSG00000163468.14	CCT3	protein_coding	2468.03	0.965136	0.277002	3.48422	0.000493569	0.00897769	Up Regulated in Acute
ENSG00000163507.13	KIAA1524	protein_coding	172.618	1.57144	0.365916	4.29454	1.75059e-05	0.000623039	Up Regulated in Acute
ENSG00000163535.17	SGOL2	protein_coding	91.996	2.46526	0.556784	4.42768	9.52522e-06	0.000383812	Up Regulated in Acute
ENSG00000163536.12	SERPINI1	protein_coding	96.1855	2.02147	0.475559	4.25072	2.1308e-05	0.000729437	Up Regulated in Acute
ENSG00000163563.7	MNDA	protein_coding	7406.8	0.947226	0.297636	3.1825	0.00146009	0.0207313	Up Regulated in Acute
ENSG00000163565.18	IFI16	protein_coding	5223.52	1.29151	0.257027	5.02482	5.03911e-07	3.32335e-05	Up Regulated in Acute
ENSG00000163568.13	AIM2	protein_coding	602.493	2.45415	0.320776	7.65068	1.99914e-14	1.6151e-11	Up Regulated in Acute
ENSG00000163590.13	PPM1L	protein_coding	267.129	-1.04219	0.322671	-3.22988	0.00123841	0.0184766	Down Regulated in Acute
ENSG00000163666.8	HESX1	protein_coding	79.4192	3.5443	0.685731	5.16865	2.35791e-07	1.71617e-05	Up Regulated in Acute
ENSG00000163682.15	RPL9	protein_coding	31122.3	-1.25078	0.412981	-3.02866	0.00245645	0.0302065	Down Regulated in Acute
ENSG00000163737.3	PF4	protein_coding	253.732	1.60068	0.512551	3.12296	0.0017904	0.024038	Up Regulated in Acute
ENSG00000163788.13	SNRK	protein_coding	1323.2	-0.850206	0.294906	-2.88298	0.00393937	0.042182	Down Regulated in Acute
ENSG00000163808.16	KIF15	protein_coding	144.303	2.7471	0.507077	5.41752	6.0431e-08	5.41971e-06	Up Regulated in Acute
ENSG00000163823.3	CCR1	protein_coding	1915.55	1.33138	0.473841	2.80975	0.00495801	0.0496046	Up Regulated in Acute
ENSG00000163832.15	ELP6	protein_coding	350.182	1.26938	0.355198	3.57373	0.000351928	0.00685942	Up Regulated in Acute
ENSG00000163902.11	RPN1	protein_coding	4434.23	1.3167	0.314537	4.18617	2.83704e-05	0.000916818	Up Regulated in Acute
ENSG00000163918.10	RFC4	protein_coding	456.252	1.47879	0.41422	3.57005	0.000356909	0.00693975	Up Regulated in Acute
ENSG00000163938.16	GNL3	protein_coding	1826.39	1.00129	0.29894	3.34947	0.00080966	0.0133495	Up Regulated in Acute
ENSG00000164045.11	CDC25A	protein_coding	96.8143	3.67756	0.698387	5.26579	1.39584e-07	1.08433e-05	Up Regulated in Acute
ENSG00000164087.7	POC1A	protein_coding	108.021	2.34081	0.624425	3.74875	0.000177721	0.00403171	Up Regulated in Acute
ENSG00000164109.13	MAD2L1	protein_coding	179.292	2.25281	0.641591	3.51128	0.000445954	0.00826344	Up Regulated in Acute
ENSG00000164209.16	SLC25A46	protein_coding	750.617	1.08338	0.349842	3.09677	0.0019564	0.025555	Up Regulated in Acute
ENSG00000164211.12	STARD4	protein_coding	340.36	1.08181	0.344192	3.14305	0.00167199	0.0230119	Up Regulated in Acute
ENSG00000164244.20	PRRC1	protein_coding	585.293	1.54743	0.51247	3.01956	0.00253142	0.0308699	Up Regulated in Acute
ENSG00000164270.17	HTR4	protein_coding	6.47839	4.44363	1.47344	3.01582	0.00256288	0.0310723	Up Regulated in Acute
ENSG00000164330.16	EBF1	protein_coding	127.878	-1.91825	0.669868	-2.86362	0.00418828	0.0440875	Down Regulated in Acute
ENSG00000164611.12	PTTG1	protein_coding	486.411	1.8825	0.530795	3.54656	0.000390295	0.00744276	Up Regulated in Acute
ENSG00000164620.8	RELL2	protein_coding	323.147	1.25318	0.355331	3.52678	0.000420641	0.00790316	Up Regulated in Acute
ENSG00000164687.10	FABP5	protein_coding	459.791	2.36495	0.461045	5.12954	2.9045e-07	2.0142e-05	Up Regulated in Acute
ENSG00000164825.3	DEFB1	protein_coding	67.2801	3.85372	0.892314	4.31879	1.56886e-05	0.000569654	Up Regulated in Acute
ENSG00000164830.17	OXR1	protein_coding	591.431	1.28453	0.442422	2.9034	0.0036913	0.0401643	Up Regulated in Acute
ENSG00000164916.10	FOXK1	protein_coding	449.243	-1.07773	0.368244	-2.92667	0.00342612	0.0382315	Down Regulated in Acute
ENSG00000164938.13	TP53INP1	protein_coding	2386.94	1.22733	0.293018	4.18859	2.80699e-05	0.000908925	Up Regulated in Acute
ENSG00000165102.14	HGSNAT	protein_coding	780.176	-1.38717	0.301634	-4.59885	4.24834e-06	0.000193912	Down Regulated in Acute
ENSG00000165233.17	C9orf89	protein_coding	603.423	-0.831267	0.285277	-2.91389	0.00356953	0.0393428	Down Regulated in Acute
ENSG00000165244.6	ZNF367	protein_coding	71.8211	1.68176	0.591507	2.84317	0.00446666	0.0463087	Up Regulated in Acute
ENSG00000165272.14	AQP3	protein_coding	1358.83	1.19259	0.408188	2.92166	0.00348167	0.0386371	Up Regulated in Acute
ENSG00000165280.15	VCP	protein_coding	4263.71	0.979737	0.333751	2.93553	0.00332976	0.0374928	Up Regulated in Acute
ENSG00000165283.15	STOML2	protein_coding	1089.71	0.914694	0.317068	2.88485	0.00391601	0.0420389	Up Regulated in Acute
ENSG00000165300.7	SLITRK5	protein_coding	13.7484	-6.72385	1.39201	-4.83031	1.36321e-06	7.41643e-05	Down Regulated in Acute
ENSG00000165304.7	MELK	protein_coding	125.264	4.20597	0.537758	7.8213	5.22803e-15	5.27966e-12	Up Regulated in Acute
ENSG00000165312.6	OTUD1	protein_coding	376.811	-1.33849	0.372415	-3.59407	0.000325551	0.00646223	Down Regulated in Acute
ENSG00000165409.15	TSHR	protein_coding	47.7477	4.16709	0.775923	5.3705	7.85205e-08	6.71288e-06	Up Regulated in Acute
ENSG00000165480.15	SKA3	protein_coding	96.7442	3.91204	0.780484	5.01233	5.37752e-07	3.39935e-05	Up Regulated in Acute
ENSG00000165490.12	DDIAS	protein_coding	101.863	2.40586	0.689969	3.48691	0.000488641	0.0089013	Up Regulated in Acute
ENSG00000165507.8	C10orf10	protein_coding	6.48257	4.28193	1.46781	2.91722	0.00353169	0.0390825	Up Regulated in Acute
ENSG00000165591.6	FAAH2	protein_coding	49.948	-1.83852	0.530176	-3.46775	0.00052483	0.00946451	Down Regulated in Acute
ENSG00000165632.7	TAF3	protein_coding	671.375	-1.67029	0.485282	-3.4419	0.000577641	0.0102454	Down Regulated in Acute
ENSG00000165682.14	CLEC1B	protein_coding	55.0641	3.59821	0.888554	4.04951	5.13242e-05	0.00148708	Up Regulated in Acute
ENSG00000165795.20	NDRG2	protein_coding	182.34	-1.33033	0.362675	-3.66809	0.000244366	0.00520219	Down Regulated in Acute
ENSG00000165806.19	CASP7	protein_coding	660.274	1.47616	0.306596	4.81467	1.47443e-06	7.9413e-05	Up Regulated in Acute
ENSG00000165810.16	BTNL9	protein_coding	26.7913	-2.84769	0.73012	-3.9003	9.60721e-05	0.0024593	Down Regulated in Acute
ENSG00000165879.8	FRAT1	protein_coding	453.45	-0.904481	0.315204	-2.86951	0.00411108	0.0434731	Down Regulated in Acute
ENSG00000165891.15	E2F7	protein_coding	44.2176	3.44824	0.713097	4.83558	1.32757e-06	7.24691e-05	Up Regulated in Acute
ENSG00000165895.17	ARHGAP42	protein_coding	87.4389	4.5297	0.706185	6.41433	1.41447e-10	3.13083e-08	Up Regulated in Acute
ENSG00000165905.16	GYLTL1B	protein_coding	75.5661	-1.91554	0.60392	-3.17184	0.00151475	0.02132	Down Regulated in Acute
ENSG00000165934.12	CPSF2	protein_coding	941.436	0.852614	0.277781	3.06937	0.00214509	0.0273347	Up Regulated in Acute
ENSG00000165948.10	IFI27L1	protein_coding	269.325	3.12491	0.565039	5.53042	3.19463e-08	3.14749e-06	Up Regulated in Acute
ENSG00000165949.12	IFI27	protein_coding	9245.33	9.44883	0.512038	18.4534	4.89804e-76	7.91425e-72	Up Regulated in Acute
ENSG00000166016.5	ABTB2	protein_coding	51.2555	2.22046	0.773236	2.87164	0.00408344	0.0432961	Up Regulated in Acute
ENSG00000166046.10	TCP11L2	protein_coding	385.368	-1.41305	0.478575	-2.95262	0.00315093	0.0360062	Down Regulated in Acute
ENSG00000166091.19	CMTM5	protein_coding	42.16	2.63297	0.787581	3.34311	0.000828441	0.0135784	Up Regulated in Acute
ENSG00000166145.14	SPINT1	protein_coding	423.062	-0.907439	0.318316	-2.85075	0.00436165	0.0455268	Down Regulated in Acute
ENSG00000166275.15	C10orf32	protein_coding	386.097	-1.16793	0.367917	-3.17446	0.00150118	0.0211474	Down Regulated in Acute
ENSG00000166278.14	C2	protein_coding	140.523	2.09701	0.603243	3.47623	0.000508511	0.00921135	Up Regulated in Acute
ENSG00000166313.18	APBB1	protein_coding	483.445	-1.6322	0.394482	-4.13758	3.50991e-05	0.00108854	Down Regulated in Acute
ENSG00000166398.12	KIAA0355	protein_coding	389.201	-1.07644	0.344633	-3.12343	0.00178756	0.0240294	Down Regulated in Acute
ENSG00000166411.13	IDH3A	protein_coding	956.283	1.08522	0.298999	3.62952	0.000283949	0.0058751	Up Regulated in Acute
ENSG00000166428.12	PLD4	protein_coding	233.409	-1.98642	0.485618	-4.09049	4.30465e-05	0.00128566	Down Regulated in Acute
ENSG00000166435.15	XRRA1	protein_coding	185.959	1.05634	0.363033	2.90977	0.003617	0.0396765	Up Regulated in Acute
ENSG00000166451.13	CENPN	protein_coding	154.579	2.67058	0.620726	4.30235	1.68997e-05	0.000606812	Up Regulated in Acute
ENSG00000166532.15	RIMKLB	protein_coding	339.437	-1.32709	0.37445	-3.54411	0.000393943	0.00749744	Down Regulated in Acute
ENSG00000166562.8	SEC11C	protein_coding	3024	2.25274	0.527228	4.27281	1.93025e-05	0.000675086	Up Regulated in Acute
ENSG00000166598.12	HSP90B1	protein_coding	31964.8	2.21992	0.442048	5.02188	5.11668e-07	3.36079e-05	Up Regulated in Acute
ENSG00000166794.4	PPIB	protein_coding	12814.7	2.03485	0.448866	4.53331	5.80675e-06	0.000249536	Up Regulated in Acute
ENSG00000166803.10	KIAA0101	protein_coding	173.749	3.42073	0.731242	4.67797	2.89728e-06	0.000139328	Up Regulated in Acute
ENSG00000166825.13	ANPEP	protein_coding	2422.93	-1.2935	0.376293	-3.43749	0.000587137	0.0103456	Down Regulated in Acute
ENSG00000166833.19	NAV2	protein_coding	9.84833	-4.20552	1.34271	-3.13211	0.00173555	0.0235261	Down Regulated in Acute
ENSG00000166851.14	PLK1	protein_coding	160.601	2.93015	0.601106	4.8746	1.0903e-06	6.15979e-05	Up Regulated in Acute
ENSG00000166927.12	MS4A7	protein_coding	1553.36	-1.08026	0.373033	-2.89588	0.00378095	0.0410017	Down Regulated in Acute
ENSG00000166979.12	EVA1C	protein_coding	162.805	-1.60787	0.572416	-2.80892	0.0049708	0.0497018	Down Regulated in Acute
ENSG00000167004.12	PDIA3	protein_coding	7079.74	0.804914	0.285209	2.82219	0.00476973	0.0484103	Up Regulated in Acute
ENSG00000167074.14	TEF	protein_coding	140.159	-1.33599	0.383533	-3.48338	0.000495117	0.00898887	Down Regulated in Acute
ENSG00000167106.11	FAM102A	protein_coding	1312.07	-1.76707	0.333854	-5.29294	1.20364e-07	9.5335e-06	Down Regulated in Acute
ENSG00000167112.9	TRUB2	protein_coding	285.043	1.18606	0.393255	3.01601	0.00256122	0.0310723	Up Regulated in Acute
ENSG00000167261.13	DPEP2	protein_coding	1498.34	-1.7874	0.308859	-5.78711	7.16087e-09	8.90041e-07	Down Regulated in Acute
ENSG00000167325.14	RRM1	protein_coding	946.869	1.12725	0.346836	3.2501	0.00115364	0.0174864	Up Regulated in Acute
ENSG00000167470.12	MIDN	protein_coding	893.063	-1.41263	0.319875	-4.41619	1.00455e-05	0.000396857	Down Regulated in Acute
ENSG00000167483.17	FAM129C	protein_coding	819.807	-1.81127	0.386228	-4.68965	2.73673e-06	0.000133596	Down Regulated in Acute
ENSG00000167513.8	CDT1	protein_coding	62.5359	2.9251	0.885056	3.30499	0.000949803	0.0150904	Up Regulated in Acute
ENSG00000167526.13	RPL13	protein_coding	31257.6	-1.2741	0.449194	-2.83642	0.00456231	0.0469839	Down Regulated in Acute
ENSG00000167553.14	TUBA1C	protein_coding	763.364	1.43435	0.286937	4.99883	5.76778e-07	3.56874e-05	Up Regulated in Acute
ENSG00000167600.13	CYP2S1	protein_coding	117.585	-1.59076	0.511744	-3.10851	0.0018803	0.0248421	Down Regulated in Acute
ENSG00000167601.11	AXL	protein_coding	44.8405	3.01582	0.932407	3.23444	0.00121881	0.0182611	Up Regulated in Acute
ENSG00000167633.16	KIR3DL1	protein_coding	48.0066	-2.52759	0.737044	-3.42936	0.000605013	0.010588	Down Regulated in Acute
ENSG00000167642.12	SPINT2	protein_coding	469.581	-0.912232	0.294771	-3.09471	0.00197004	0.0256709	Down Regulated in Acute
ENSG00000167657.11	DAPK3	protein_coding	162.679	1.18768	0.408874	2.90474	0.00367553	0.0401007	Up Regulated in Acute
ENSG00000167670.15	CHAF1A	protein_coding	294.727	1.00201	0.3233	3.09932	0.00193966	0.0253979	Up Regulated in Acute
ENSG00000167680.15	SEMA6B	protein_coding	84.0648	-5.50453	0.638743	-8.61776	6.82791e-18	1.22584e-14	Down Regulated in Acute
ENSG00000167703.14	SLC43A2	protein_coding	1080.29	-1.30411	0.33591	-3.88233	0.00010346	0.00260391	Down Regulated in Acute
ENSG00000167861.15	HID1	protein_coding	104.385	1.73067	0.580795	2.97984	0.00288402	0.0336372	Up Regulated in Acute
ENSG00000167895.14	TMC8	protein_coding	5134.57	-1.2437	0.35637	-3.48992	0.000483164	0.00882142	Down Regulated in Acute
ENSG00000167900.11	TK1	protein_coding	253.411	3.48186	0.651961	5.3406	9.26402e-08	7.67631e-06	Up Regulated in Acute
ENSG00000167920.8	TMEM99	protein_coding	88.3203	1.8047	0.581775	3.10205	0.00192185	0.0251858	Up Regulated in Acute
ENSG00000167992.12	VWCE	protein_coding	8.74264	4.93037	1.31264	3.75606	0.000172609	0.00397008	Up Regulated in Acute
ENSG00000167996.15	FTH1	protein_coding	42669.2	-1.13348	0.31962	-3.54635	0.000390609	0.00744276	Down Regulated in Acute
ENSG00000168056.14	LTBP3	protein_coding	370.985	-1.56793	0.386866	-4.0529	5.05866e-05	0.00147184	Down Regulated in Acute
ENSG00000168062.9	BATF2	protein_coding	148.622	2.60321	0.611619	4.25626	2.07872e-05	0.000713122	Up Regulated in Acute
ENSG00000168066.20	SF1	protein_coding	4830.06	-1.23932	0.310698	-3.98881	6.64056e-05	0.00183103	Down Regulated in Acute
ENSG00000168078.9	PBK	protein_coding	68.7397	4.16704	0.74251	5.6121	1.99891e-08	2.08377e-06	Up Regulated in Acute
ENSG00000168081.8	PNOC	protein_coding	234.759	1.76333	0.415912	4.23967	2.23845e-05	0.000753019	Up Regulated in Acute
ENSG00000168214.20	RBPJ	protein_coding	1647.8	-0.961222	0.290128	-3.3131	0.000922671	0.0147609	Down Regulated in Acute
ENSG00000168229.3	PTGDR	protein_coding	109.849	-2.34089	0.650056	-3.60106	0.000316928	0.00636139	Down Regulated in Acute
ENSG00000168234.12	TTC39C	protein_coding	925.74	-0.923348	0.304909	-3.02827	0.00245957	0.0302219	Down Regulated in Acute
ENSG00000168255.18	POLR2J3	protein_coding	252.909	-1.31588	0.431526	-3.04937	0.0022932	0.0287554	Down Regulated in Acute
ENSG00000168264.10	IRF2BP2	protein_coding	2460.19	-0.917684	0.286188	-3.20657	0.00134326	0.0196392	Down Regulated in Acute
ENSG00000168268.10	NT5DC2	protein_coding	441.394	2.19841	0.489746	4.48888	7.16002e-06	0.000302067	Up Regulated in Acute
ENSG00000168280.16	KIF5C	protein_coding	67.1484	-1.7939	0.592627	-3.02704	0.00246965	0.0303226	Down Regulated in Acute
ENSG00000168282.5	MGAT2	protein_coding	990.929	0.985803	0.313559	3.14392	0.00166704	0.0229633	Up Regulated in Acute
ENSG00000168310.10	IRF2	protein_coding	1235.58	1.16734	0.376272	3.1024	0.00191961	0.0251858	Up Regulated in Acute
ENSG00000168374.10	ARF4	protein_coding	1704.09	1.40966	0.351576	4.00954	6.08361e-05	0.00169481	Up Regulated in Acute
ENSG00000168393.12	DTYMK	protein_coding	205.988	1.12021	0.375314	2.98473	0.00283833	0.033354	Up Regulated in Acute
ENSG00000168394.10	TAP1	protein_coding	6153.87	1.06007	0.249034	4.25674	2.07427e-05	0.000713122	Up Regulated in Acute
ENSG00000168439.16	STIP1	protein_coding	1302.39	0.958709	0.245138	3.9109	9.19522e-05	0.00236586	Up Regulated in Acute
ENSG00000168447.10	SCNN1B	protein_coding	8.87005	5.56997	1.44511	3.85435	0.000116035	0.00283646	Up Regulated in Acute
ENSG00000168496.3	FEN1	protein_coding	540.525	2.30523	0.492904	4.67683	2.91338e-06	0.000139686	Up Regulated in Acute
ENSG00000168517.10	HEXIM2	protein_coding	59.165	1.89776	0.504119	3.7645	0.000166882	0.00388542	Up Regulated in Acute
ENSG00000168546.10	GFRA2	protein_coding	42.0756	-2.25166	0.791453	-2.84497	0.00444156	0.0461225	Down Regulated in Acute
ENSG00000168646.12	AXIN2	protein_coding	126.297	-1.71999	0.435228	-3.95192	7.75271e-05	0.0020667	Down Regulated in Acute
ENSG00000168675.18	LDLRAD4	protein_coding	347.334	-1.17995	0.298632	-3.95118	7.77666e-05	0.0020667	Down Regulated in Acute
ENSG00000168758.10	SEMA4C	protein_coding	224.873	-1.86833	0.4348	-4.29697	1.73146e-05	0.000618959	Down Regulated in Acute
ENSG00000168803.14	ADAL	protein_coding	99.8398	1.85524	0.570803	3.25022	0.00115315	0.0174864	Up Regulated in Acute
ENSG00000168811.6	IL12A	protein_coding	60.2938	2.20071	0.707563	3.11027	0.00186915	0.0247716	Up Regulated in Acute
ENSG00000168918.13	INPP5D	protein_coding	3872.83	-0.982752	0.327549	-3.00032	0.00269694	0.0322793	Down Regulated in Acute
ENSG00000169122.11	FAM110B	protein_coding	50.1584	-2.71368	0.688625	-3.94072	8.12382e-05	0.00214836	Down Regulated in Acute
ENSG00000169223.14	LMAN2	protein_coding	2102.33	0.996168	0.353255	2.81997	0.00480287	0.0486245	Up Regulated in Acute
ENSG00000169239.12	CA5B	protein_coding	415.513	-1.23039	0.290815	-4.23084	2.32817e-05	0.000777243	Down Regulated in Acute
ENSG00000169245.5	CXCL10	protein_coding	702.905	3.44944	0.496764	6.94383	3.8161e-12	1.34045e-09	Up Regulated in Acute
ENSG00000169248.12	CXCL11	protein_coding	56.3099	5.5933	1.0341	5.40887	6.34242e-08	5.62278e-06	Up Regulated in Acute
ENSG00000169299.13	PGM2	protein_coding	478.332	1.34264	0.373416	3.59555	0.000323701	0.00643341	Up Regulated in Acute
ENSG00000169359.13	SLC33A1	protein_coding	536.766	1.16705	0.313726	3.71998	0.00019924	0.00442215	Up Regulated in Acute
ENSG00000169385.2	RNASE2	protein_coding	2488.24	2.76846	0.293091	9.44575	3.52863e-21	1.14031e-17	Up Regulated in Acute
ENSG00000169397.3	RNASE3	protein_coding	89.7856	2.77562	0.739528	3.75323	0.000174572	0.00399537	Up Regulated in Acute
ENSG00000169429.10	CXCL8	protein_coding	421.986	-2.39498	0.591616	-4.0482	5.16131e-05	0.00149189	Down Regulated in Acute
ENSG00000169504.14	CLIC4	protein_coding	760.75	1.35862	0.272838	4.97956	6.37275e-07	3.8422e-05	Up Regulated in Acute
ENSG00000169607.12	CKAP2L	protein_coding	72.0658	3.17951	0.657411	4.8364	1.32211e-06	7.24158e-05	Up Regulated in Acute
ENSG00000169679.14	BUB1	protein_coding	493.291	3.52271	0.510325	6.90288	5.09597e-12	1.71543e-09	Up Regulated in Acute
ENSG00000169715.14	MT1E	protein_coding	127.033	3.13318	0.541579	5.78527	7.23942e-09	8.92935e-07	Up Regulated in Acute
ENSG00000169925.16	BRD3	protein_coding	461.244	-1.16569	0.33011	-3.53123	0.000413638	0.00782619	Down Regulated in Acute
ENSG00000170027.6	YWHAG	protein_coding	1295.65	1.09709	0.387563	2.83074	0.00464409	0.0475287	Up Regulated in Acute
ENSG00000170074.19	FAM153A	protein_coding	181.483	-1.93365	0.450576	-4.29151	1.77458e-05	0.000628527	Down Regulated in Acute
ENSG00000170275.14	CRTAP	protein_coding	2362.35	-0.771194	0.239788	-3.21615	0.00129925	0.0191195	Down Regulated in Acute
ENSG00000170312.15	CDK1	protein_coding	268.241	3.52542	1.25249	2.81472	0.00488193	0.0491478	Up Regulated in Acute
ENSG00000170439.6	METTL7B	protein_coding	89.2585	5.0131	0.748579	6.69681	2.13014e-11	6.03839e-09	Up Regulated in Acute
ENSG00000170456.14	DENND5B	protein_coding	523.233	2.62778	0.36038	7.2917	3.06079e-13	1.70539e-10	Up Regulated in Acute
ENSG00000170469.10	SPATA24	protein_coding	45.0125	2.15807	0.698517	3.0895	0.00200497	0.0260002	Up Regulated in Acute
ENSG00000170476.15	MZB1	protein_coding	6665.52	4.01395	0.518775	7.73736	1.01504e-14	9.11169e-12	Up Regulated in Acute
ENSG00000170482.16	SLC23A1	protein_coding	26.4272	4.65897	0.970773	4.79924	1.59268e-06	8.52137e-05	Up Regulated in Acute
ENSG00000170486.10	KRT72	protein_coding	253.691	-2.20793	0.355583	-6.20932	5.32139e-10	1.02361e-07	Down Regulated in Acute
ENSG00000170525.18	PFKFB3	protein_coding	1438.49	-2.16357	0.502383	-4.30661	1.65772e-05	0.000597889	Down Regulated in Acute
ENSG00000170647.3	TMEM133	protein_coding	29.9897	2.72286	0.896514	3.03717	0.00238813	0.0296598	Up Regulated in Acute
ENSG00000170734.11	POLH	protein_coding	201.954	1.14992	0.35505	3.23876	0.00120049	0.0180442	Up Regulated in Acute
ENSG00000170819.4	BFSP2	protein_coding	28.5969	3.60523	0.911272	3.95626	7.61311e-05	0.00203663	Up Regulated in Acute
ENSG00000170873.18	MTSS1	protein_coding	1021.33	-1.45551	0.353226	-4.12061	3.77872e-05	0.00115857	Down Regulated in Acute
ENSG00000170921.14	TANC2	protein_coding	202.745	-1.81568	0.486201	-3.73442	0.000188151	0.0041991	Down Regulated in Acute
ENSG00000171049.8	FPR2	protein_coding	568.822	1.7201	0.574509	2.99404	0.00275308	0.0327331	Up Regulated in Acute
ENSG00000171067.10	C11orf24	protein_coding	437.356	1.04915	0.315806	3.32213	0.000893326	0.0144214	Up Regulated in Acute
ENSG00000171155.7	C1GALT1C1	protein_coding	533.231	2.22017	0.55808	3.97823	6.94308e-05	0.00188633	Up Regulated in Acute
ENSG00000171206.13	TRIM8	protein_coding	1171.75	-1.08367	0.296112	-3.65965	0.000252559	0.00534842	Down Regulated in Acute
ENSG00000171223.5	JUNB	protein_coding	1361.33	-1.20897	0.360685	-3.35188	0.000802661	0.0132611	Down Regulated in Acute
ENSG00000171236.9	LRG1	protein_coding	178.991	-1.83742	0.587497	-3.12754	0.00176274	0.0238346	Down Regulated in Acute
ENSG00000171241.8	SHCBP1	protein_coding	358.004	3.48357	0.548597	6.34997	2.15359e-10	4.51918e-08	Up Regulated in Acute
ENSG00000171320.14	ESCO2	protein_coding	65.9349	4.51228	0.669075	6.74406	1.54022e-11	4.60869e-09	Up Regulated in Acute
ENSG00000171428.13	NAT1	protein_coding	124.894	1.32005	0.427936	3.08468	0.00203768	0.0262558	Up Regulated in Acute
ENSG00000171476.21	HOPX	protein_coding	497.625	-1.4969	0.458798	-3.26265	0.00110375	0.0168726	Down Regulated in Acute
ENSG00000171502.14	COL24A1	protein_coding	61.2539	2.55728	0.591603	4.32263	1.5418e-05	0.000562355	Up Regulated in Acute
ENSG00000171522.5	PTGER4	protein_coding	627.355	-1.29362	0.310018	-4.17274	3.0096e-05	0.000959154	Down Regulated in Acute
ENSG00000171552.12	BCL2L1	protein_coding	619.121	1.05082	0.316536	3.31975	0.000900974	0.0145289	Up Regulated in Acute
ENSG00000171596.6	NMUR1	protein_coding	150.143	-2.29649	0.560955	-4.09389	4.24197e-05	0.00126929	Down Regulated in Acute
ENSG00000171631.14	P2RY6	protein_coding	111.474	2.69758	0.593047	4.54868	5.39844e-06	0.000235116	Up Regulated in Acute
ENSG00000171729.13	TMEM51	protein_coding	48.7755	2.43433	0.747149	3.25815	0.0011214	0.0170778	Up Regulated in Acute
ENSG00000171791.11	BCL2	protein_coding	1103.74	-0.82595	0.267799	-3.08422	0.00204089	0.0262763	Down Regulated in Acute
ENSG00000171798.17	KNDC1	protein_coding	33.2628	-3.79431	0.850043	-4.46366	8.05712e-06	0.000334671	Down Regulated in Acute
ENSG00000171843.15	MLLT3	protein_coding	291.879	-0.971522	0.331869	-2.92742	0.00341785	0.038192	Down Regulated in Acute
ENSG00000171848.13	RRM2	protein_coding	1496.89	3.85116	0.535973	7.18536	6.7031e-13	3.28208e-10	Up Regulated in Acute
ENSG00000171860.4	C3AR1	protein_coding	1396.46	1.00193	0.336253	2.9797	0.00288533	0.0336372	Up Regulated in Acute
ENSG00000171954.12	CYP4F22	protein_coding	52.0975	-1.69555	0.528809	-3.20635	0.00134428	0.0196392	Down Regulated in Acute
ENSG00000171992.12	SYNPO	protein_coding	61.5561	-2.68467	0.532279	-5.04374	4.56526e-07	3.04816e-05	Down Regulated in Acute
ENSG00000172005.10	MAL	protein_coding	648.27	-1.81068	0.382328	-4.73592	2.18062e-06	0.0001108	Down Regulated in Acute
ENSG00000172059.10	KLF11	protein_coding	669.269	-1.55166	0.334557	-4.63795	3.51888e-06	0.000165285	Down Regulated in Acute
ENSG00000172071.11	EIF2AK3	protein_coding	1032.65	1.69835	0.417863	4.06437	4.81621e-05	0.00141235	Up Regulated in Acute
ENSG00000172115.8	CYCS	protein_coding	1277.72	1.68746	0.409991	4.11584	3.85771e-05	0.00117609	Up Regulated in Acute
ENSG00000172172.7	MRPL13	protein_coding	508.355	1.04931	0.370982	2.82845	0.00467733	0.0477425	Up Regulated in Acute
ENSG00000172183.14	ISG20	protein_coding	2138.13	1.79162	0.333794	5.36743	7.98655e-08	6.75637e-06	Up Regulated in Acute
ENSG00000172215.5	CXCR6	protein_coding	200.455	1.55227	0.457575	3.3924	0.000692843	0.0117966	Up Regulated in Acute
ENSG00000172345.13	STARD5	protein_coding	201.589	1.54813	0.541815	2.85731	0.00427248	0.0447987	Up Regulated in Acute
ENSG00000172469.14	MANEA	protein_coding	436.092	2.77612	0.392981	7.06427	1.61461e-12	6.7596e-10	Up Regulated in Acute
ENSG00000172508.10	CARNS1	protein_coding	166.828	-1.989	0.427213	-4.65574	3.22815e-06	0.000153413	Down Regulated in Acute
ENSG00000172543.7	CTSW	protein_coding	2109.08	-1.09223	0.348458	-3.13447	0.00172165	0.0234161	Down Regulated in Acute
ENSG00000172766.18	NAA16	protein_coding	547.261	-0.756813	0.264681	-2.85934	0.0042452	0.0445995	Down Regulated in Acute
ENSG00000172794.19	RAB37	protein_coding	1141.57	-1.11748	0.285625	-3.91241	9.13802e-05	0.00236243	Down Regulated in Acute
ENSG00000173068.17	BNC2	protein_coding	27.9994	-3.27399	0.884927	-3.69973	0.000215829	0.00469525	Down Regulated in Acute
ENSG00000173114.12	LRRN3	protein_coding	203.049	-1.41786	0.393269	-3.60532	0.000311774	0.00629214	Down Regulated in Acute
ENSG00000173171.14	MTX1	protein_coding	246.503	1.55699	0.539165	2.88778	0.00387969	0.0417737	Up Regulated in Acute
ENSG00000173207.12	CKS1B	protein_coding	236.544	1.83169	0.401534	4.56174	5.07316e-06	0.000224581	Up Regulated in Acute
ENSG00000173221.13	GLRX	protein_coding	2602.44	1.48432	0.304807	4.8697	1.11766e-06	6.22728e-05	Up Regulated in Acute
ENSG00000173226.16	IQCB1	protein_coding	745.324	0.977605	0.321435	3.04137	0.00235501	0.0293387	Up Regulated in Acute
ENSG00000173334.3	TRIB1	protein_coding	1207.02	2.69037	0.396015	6.79361	1.09365e-11	3.3983e-09	Up Regulated in Acute
ENSG00000173369.15	C1QB	protein_coding	375.269	3.53449	0.649606	5.44098	5.29885e-08	4.86471e-06	Up Regulated in Acute
ENSG00000173372.16	C1QA	protein_coding	513.306	2.06754	0.457635	4.51787	6.2465e-06	0.000266309	Up Regulated in Acute
ENSG00000173511.9	VEGFB	protein_coding	463.092	-1.6291	0.503566	-3.23513	0.00121589	0.0182418	Down Regulated in Acute
ENSG00000173540.12	GMPPB	protein_coding	680.258	1.89539	0.343731	5.51415	3.50464e-08	3.41133e-06	Up Regulated in Acute
ENSG00000173567.14	ADGRF3	protein_coding	20.1422	2.74256	0.84572	3.24287	0.00118332	0.0178359	Up Regulated in Acute
ENSG00000173611.17	SCAI	protein_coding	157.06	-1.10068	0.34037	-3.23377	0.0012217	0.0182611	Down Regulated in Acute
ENSG00000173715.15	C11orf80	protein_coding	299.031	1.26863	0.37927	3.34492	0.000823064	0.0135291	Up Regulated in Acute
ENSG00000173762.7	CD7	protein_coding	422.896	-1.80735	0.39565	-4.56804	4.92295e-06	0.000220347	Down Regulated in Acute
ENSG00000173786.16	CNP	protein_coding	1114.21	1.37532	0.259145	5.30715	1.11353e-07	9.0414e-06	Up Regulated in Acute
ENSG00000173812.10	EIF1	protein_coding	14820.5	-1.17943	0.30703	-3.84141	0.00012233	0.00296651	Down Regulated in Acute
ENSG00000173848.18	NET1	protein_coding	352.258	1.33835	0.393738	3.39907	0.000676143	0.0115978	Up Regulated in Acute
ENSG00000174080.10	CTSF	protein_coding	173.944	-1.53048	0.411319	-3.72091	0.000198509	0.00441197	Down Regulated in Acute
ENSG00000174282.11	ZBTB4	protein_coding	1273.23	-1.32483	0.347141	-3.8164	0.000135416	0.00322245	Down Regulated in Acute
ENSG00000174307.6	PHLDA3	protein_coding	14.5237	2.83068	1.00456	2.81783	0.00483501	0.0488581	Up Regulated in Acute
ENSG00000174405.13	LIG4	protein_coding	232.293	1.61225	0.53957	2.98804	0.00280776	0.0331878	Up Regulated in Acute
ENSG00000174442.11	ZWILCH	protein_coding	249.212	1.48879	0.3603	4.13208	3.595e-05	0.00111067	Up Regulated in Acute
ENSG00000174469.17	CNTNAP2	protein_coding	24.1319	-2.66824	0.81099	-3.2901	0.00100151	0.0157405	Down Regulated in Acute
ENSG00000174579.3	MSL2	protein_coding	1090.46	-0.81509	0.255127	-3.19484	0.0013991	0.0202026	Down Regulated in Acute
ENSG00000175063.16	UBE2C	protein_coding	148.07	3.50617	0.714877	4.90457	9.36305e-07	5.38392e-05	Up Regulated in Acute
ENSG00000175115.11	PACS1	protein_coding	1579.47	-1.32956	0.322376	-4.12424	3.71967e-05	0.00114263	Down Regulated in Acute
ENSG00000175130.6	MARCKSL1	protein_coding	705.576	-0.991478	0.31103	-3.18772	0.00143398	0.0204865	Down Regulated in Acute
ENSG00000175265.17	GOLGA8A	protein_coding	1410.51	-0.854812	0.263815	-3.2402	0.00119446	0.0179703	Down Regulated in Acute
ENSG00000175274.18	TP53I11	protein_coding	226.6	-1.17098	0.40156	-2.91609	0.00354451	0.0391471	Down Regulated in Acute
ENSG00000175305.16	CCNE2	protein_coding	77.5314	2.46463	0.619462	3.97866	6.93049e-05	0.00188633	Up Regulated in Acute
ENSG00000175505.10	CLCF1	protein_coding	90.1994	-1.99519	0.455736	-4.37796	1.19796e-05	0.000456524	Down Regulated in Acute
ENSG00000175544.13	CABP4	protein_coding	53.6192	-3.03672	0.659129	-4.60718	4.08166e-06	0.000188973	Down Regulated in Acute
ENSG00000175806.14	MSRA	protein_coding	217.555	-0.952792	0.329769	-2.88927	0.0038614	0.0416506	Down Regulated in Acute
ENSG00000175866.15	BAIAP2	protein_coding	96.0154	-1.51739	0.464903	-3.26389	0.00109893	0.0168467	Down Regulated in Acute
ENSG00000176102.11	CSTF3	protein_coding	448.725	0.915234	0.301524	3.03536	0.00240252	0.029795	Up Regulated in Acute
ENSG00000176208.8	ATAD5	protein_coding	119.142	1.53005	0.493922	3.09776	0.00194986	0.0254902	Up Regulated in Acute
ENSG00000176293.19	ZNF135	protein_coding	39.2468	-2.01039	0.569916	-3.52752	0.000419468	0.00790316	Down Regulated in Acute
ENSG00000176463.13	SLCO3A1	protein_coding	803.347	-1.14082	0.28939	-3.94214	8.07576e-05	0.00213915	Down Regulated in Acute
ENSG00000176595.3	KBTBD11	protein_coding	500.569	-1.50938	0.31347	-4.81507	1.47152e-06	7.9413e-05	Down Regulated in Acute
ENSG00000176658.16	MYO1D	protein_coding	308.568	1.93635	0.481756	4.01936	5.83571e-05	0.00164274	Up Regulated in Acute
ENSG00000176845.12	METRNL	protein_coding	529.299	-2.10261	0.457874	-4.59211	4.38788e-06	0.000199716	Down Regulated in Acute
ENSG00000176890.15	TYMS	protein_coding	589.625	3.69837	0.624425	5.92285	3.16416e-09	4.36979e-07	Up Regulated in Acute
ENSG00000176928.5	GCNT4	protein_coding	137.701	-1.56228	0.417672	-3.74044	0.0001837	0.00412253	Down Regulated in Acute
ENSG00000176974.17	SHMT1	protein_coding	294.844	1.41085	0.418322	3.37264	0.000744505	0.0125309	Up Regulated in Acute
ENSG00000177096.8	FAM109B	protein_coding	70.7503	2.16034	0.679206	3.18068	0.00146932	0.0208256	Up Regulated in Acute
ENSG00000177294.6	FBXO39	protein_coding	7.0554	4.65324	1.6278	2.85861	0.00425505	0.0446738	Up Regulated in Acute
ENSG00000177301.13	KCNA2	protein_coding	100.76	3.47175	0.655694	5.29477	1.19163e-07	9.48493e-06	Up Regulated in Acute
ENSG00000177311.10	ZBTB38	protein_coding	821.064	1.37131	0.336872	4.0707	4.68718e-05	0.00138203	Up Regulated in Acute
ENSG00000177359.17	OVOS2	protein_coding	26.0356	-2.56991	0.914551	-2.81003	0.00495371	0.0495923	Down Regulated in Acute
ENSG00000177374.12	HIC1	protein_coding	45.1686	-4.57307	0.887634	-5.15198	2.57751e-07	1.83469e-05	Down Regulated in Acute
ENSG00000177409.11	SAMD9L	protein_coding	6082.46	2.61559	0.396368	6.5989	4.14233e-11	1.04581e-08	Up Regulated in Acute
ENSG00000177426.20	TGIF1	protein_coding	400.266	-1.66795	0.290509	-5.7415	9.38438e-09	1.10681e-06	Down Regulated in Acute
[truncated: 303 more rows]

## Sheet: Recovered-vs-Acute (Severity 2)
ID	GeneName	BioType	baseMean	log2FoldChange	lfcSE	stat	pvalue	padj	Significance
[truncated: 4,256 more rows]
