# Supplementary material for: Longitudinal blood cell transcriptomic profiling and in vitro temporal proteomics provides novel insights into metabolic reprogramming and host-immune responses against Crimean-Congo Hemorrhagic Fever Virus
Source: Research Square preprint supplement (doi:10.21203/rs.3.rs-465746/v1), 2021-05-06
Supplement: Supplementary file 2 [file dee073fad403411a91fe6910.xlsx]

## Sheet: Cluster1
Term	Overlap	P-value	Adjusted P-value	Genes
N-Glycan biosynthesis	27/50	1.7773e-11	2.54155e-09	DOLPP1;ALG8;ALG14;MAN1A1;GANAB;RPN2;DPM1;RPN1;FUT8;B4GALT2;DOLK;ST6GAL1;ALG2;STT3A;MGAT3;ALG3;DPM2;MAN1A2;MOGS;MAN2A1;ALG1;DDOST;STT3B;MGAT2;DPAGT1;B4GALT3;ALG5
Citrate cycle (TCA cycle)	19/30	4.26745e-10	3.05123e-08	OGDH;ACLY;ACO2;SDHA;IDH2;SDHB;FH;IDH1;DLAT;SDHD;DLD;SUCLG1;SDHC;SUCLA2;PDHB;PDHA1;IDH3A;MDH1;PCK2
Thermogenesis	62/231	7.92491e-08	3.77754e-06	CPT2;NDUFB9;KRAS;NDUFA4L2;COX5A;COA1;NDUFB4;COX8A;NDUFA12;NDUFAF1;RPS6KB2;ADCY3;CYC1;COX17;NDUFA8;NDUFAF6;MT-ND2;COX6A1;NRAS;COX7B;COX7A2;ACSL1;MT-ND4;SOS1;COA6;SDHA;MT-ND4L;NDUFS2;UQCRC2;SDHB;MT-ATP8;SDHD;PPARG;NDUFAF3;COA4;MT-CO1;COX10;SDHC;PRKAG1;NDUFB6;BMP8B;MT-ND1;MT-CO2;NDUFS1;UQCRHL;CREB3;CREB3L2;COA7;UQCRH;MT-ND5;COX18;SMARCB1;MT-ATP6;MT-ND6;NDUFB3;MGLL;ACTL6A;NDUFS3;COX15;MAPK12;DPF3;ACS…
Oxidative phosphorylation	41/133	2.37205e-07	8.48006e-06	NDUFB9;NDUFA4L2;COX5A;NDUFB4;ATP6V1A;COX8A;NDUFA12;CYC1;COX17;NDUFA8;MT-ND2;COX6A1;COX7B;MT-ND4;ATP6V1H;SDHA;MT-ND4L;NDUFS2;UQCRC2;SDHB;MT-ATP8;SDHD;ATP6V1C1;ATP6V1D;MT-CO1;COX10;SDHC;NDUFB6;MT-ND1;MT-CO2;NDUFS1;UQCRHL;UQCRH;MT-ND5;MT-ATP6;MT-ND6;NDUFB3;PPA1;NDUFS3;COX15;COX7A2
Amino sugar and nucleotide sugar metabolism	19/48	7.64737e-06	0.000182262	GALE;GMPPA;UAP1;GMPPB;PMM1;CYB5R2;UGDH;GNPNAT1;UGP2;GFPT1;PGM3;TSTA3;GNPDA1;PGM2;PMM2;GMDS;CHIT1;NANS;CMAS
Terpenoid backbone biosynthesis	12/22	7.02649e-06	0.000182262	HMGCR;PDSS2;ACAT2;ACAT1;ICMT;ZMPSTE24;PDSS1;HMGCS1;NUS1;FDPS;DHDDS;PMVK
One carbon pool by folate	11/20	1.54565e-05	0.000315754	MTHFD1L;ALDH1L2;TYMS;ATIC;MTHFD2;DHFR;GART;MTHFD2L;SHMT2;MTHFD1;SHMT1
Propanoate metabolism	14/32	3.18347e-05	0.000505819	SUCLA2;ACAT2;ACADM;ACACA;ACAT1;HIBCH;DLD;LDHA;PCCB;ACSS1;SUCLG1;EHHADH;MCEE;ALDH6A1
Valine, leucine and isoleucine degradation	18/48	3.15352e-05	0.000505819	HSD17B10;ALDH1B1;ALDH7A1;ACAT2;MCCC2;ACADM;ACAT1;HIBCH;OXCT1;IL4I1;PCCB;DLD;MCEE;EHHADH;AACS;HMGCS1;ALDH6A1;OXCT2
Glyoxylate and dicarboxylate metabolism	13/30	6.89031e-05	0.000985314	ACAT2;ACO2;ACAT1;DLD;AFMID;PCCB;HYI;ACSS1;MCEE;SHMT2;MDH1;GLDC;SHMT1
Pyruvate metabolism	15/39	0.000101734	0.00132254	ME2;ALDH1B1;FH;DLAT;ACAT2;ALDH7A1;PDHB;ACACA;ACAT1;DLD;LDHA;ACSS1;PDHA1;MDH1;PCK2
Pyrimidine metabolism	18/57	0.000395797	0.00471659	CAD;CMPK2;ENTPD5;PNP;CTPS1;TYMS;NT5C3A;UCK2;UMPS;TK1;NME1;RRM1;DTYMK;RRM2;ENTPD1;DCTPP1;NT5C2;TYMP
Alanine, aspartate and glutamate metabolism	13/35	0.000437222	0.00480944	CAD;GOT2;GPT2;ASS1;ASNS;ALDH4A1;DDO;GLS;GOT1;IL4I1;GFPT1;PPAT;ADSL
Glycine, serine and threonine metabolism	14/40	0.000538579	0.00522682	ALAS1;BPGM;PSAT1;PGAM1;ALDH7A1;AOC3;DLD;PSPH;PHGDH;SHMT2;GLDC;SHMT1;CTH;SRR
Glycolysis / Gluconeogenesis	20/68	0.000548268	0.00522682	PGAM1;GAPDH;PCK2;AKR1A1;BPGM;MINPP1;DLAT;GALM;LDHA;PFKM;ACSS1;DLD;ENO1;ADH5;PGM2;ALDH7A1;PFKP;PDHB;PDHA1;ALDH1B1
NOD-like receptor signaling pathway	40/178	0.000896861	0.0080157	IFI16;IRF9;MFN1;PANX1;OAS2;GBP4;CCL2;VDAC1;ATG5;AIM2;TRAF2;CARD6;IL6;NLRP7;PRKCD;GSDMD;IFNAR2;TRIP6;FADD;CHUK;GBP5;IFNAR1;CASP4;STAT1;GBP1;DNM1L;CARD17;HSP90AB1;MCU;TBK1;BCL2L1;IRF7;STAT2;VDAC3;OAS1;OAS3;TXN;TANK;GBP3;MAPK12
Arginine and proline metabolism	15/49	0.00167645	0.0141019	ALDH18A1;GOT2;LAP3;ARG2;ALDH7A1;L3HYPDH;ALDH4A1;SMOX;GOT1;CNDP2;CKM;SRM;PYCR1;ALDH1B1;ODC1
Purine metabolism	29/129	0.00422123	0.0335354	ENTPD5;PFAS;NUDT5;PAPSS1;NME1;PDE6D;PPAT;GMPR;ADCY3;ADSL;AK6;NUDT9;PRPS2;GART;RRM2;RRM1;ATIC;PAICS;PGM2;ENTPD1;HDDC3;ADA;PNP;NT5C3A;AMPD1;AK3;AK4;NT5C2;AK2
Fatty acid biosynthesis	6/13	0.00468531	0.033583	ACSL4;ACSBG1;ACACA;ACSL1;OXSM;MCAT
Fatty acid degradation	13/44	0.00469693	0.033583	CPT2;ECI1;ACADVL;ALDH7A1;ACAT2;ACSBG1;ACADM;ACSL1;ACAT1;ADH5;EHHADH;ALDH1B1;ACSL4
Synthesis and degradation of ketone bodies	5/10	0.00656635	0.0426813	ACAT2;ACAT1;OXCT1;HMGCS1;OXCT2
beta-Alanine metabolism	10/31	0.00640775	0.0426813	ALDH7A1;ACADM;AOC3;SMOX;HIBCH;CNDP2;SRM;EHHADH;ALDH1B1;ALDH6A1
Biosynthesis of unsaturated fatty acids	9/27	0.00753162	0.046827	HSD17B12;SCP2;ELOVL3;ACOT7;ACOT2;HSD17B4;TECR;SCD;HACD3
Tryptophan metabolism	12/42	0.00866047	0.051602	IDO2;ALDH7A1;ACAT2;KMO;DHTKD1;ACAT1;DLD;AFMID;IL4I1;EHHADH;ALDH1B1;IDO1
Cytosolic DNA-sensing pathway	16/63	0.00917259	0.0524672	DDX58;POLR3D;IRF7;CXCL10;TREX1;POLR3G;POLR2K;POLR3B;ZBP1;POLR3A;ADAR;CHUK;AIM2;TBK1;POLR3K;IL6
Steroid biosynthesis	7/19	0.00987594	0.0543177	NSDHL;DHCR7;HSD17B7;SQLE;MSMO1;CYP27B1;DHCR24
RIG-I-like receptor signaling pathway	17/70	0.0116871	0.0618984	DDX58;IRF7;CXCL10;FADD;IFIH1;IL12A;TRIM25;SIKE1;CASP10;ATG5;TANK;CHUK;TRAF2;MAPK12;ISG15;DHX58;TBK1
Progesterone-mediated oocyte maturation	22/99	0.0133075	0.0679632	CDK1;KRAS;CDC27;CCNB1;IGF1;CDK2;MAD2L1;ADCY3;BUB1;CDC25A;PLK1;CDC25C;CPEB4;KIF22;CCNA2;HSP90AB1;CDC23;CCNA1;CCNB2;PKMYT1;AURKA;MAPK12
Phenylalanine, tyrosine and tryptophan biosynthesis	3/5	0.020534	0.0992941	GOT2;GOT1;IL4I1
Selenocompound metabolism	6/17	0.0208309	0.0992941	MARS;SEPHS1;PAPSS1;MARS2;TXNRD1;CTH
Chemokine signaling pathway	36/190	0.0250152	0.112381	CCR5;SHC1;CCL1;KRAS;JAK2;CCL2;CXCR3;CCR2;CXCL9;GNGT2;ADCY3;CXCL11;PRKCD;PIK3CG;NRAS;CCL8;SOS1;GNG7;CHUK;STAT1;CCR3;GNB4;CXCL10;CCR1;PTK2B;GRK6;VAV1;CCR9;STAT2;CCL25;XCR1;CCR10;GNG5;GRK5;CXCR6;NCF1
Intestinal immune network for IgA production	12/48	0.0251481	0.112381	CCR9;TNFRSF17;TNFRSF13B;CCL25;CD80;CD40;ITGB7;IL15RA;IL10;CCR10;ITGA4;IL6
ECM-receptor interaction	18/82	0.0264662	0.114687	ITGA3;ITGA1;SDC1;HSPG2;COL9A3;TNN;LAMA5;ITGB1;FN1;COL4A4;LAMC1;ITGA8;ITGB7;AGRN;SPP1;ITGA7;ITGA4;HMMR
Butanoate metabolism	8/28	0.0296978	0.124905	ACAT2;L2HGDH;ACAT1;OXCT1;AACS;HMGCS1;EHHADH;OXCT2
Vitamin B6 metabolism	3/6	0.0369288	0.150881	PDXK;PNPO;PSAT1
Glycosylphosphatidylinositol (GPI)-anchor biosynthesis	7/25	0.0452714	0.179828	GPLD1;PIGP;PGAP1;PIGF;DPM2;PIGU;PIGK
Galactose metabolism	8/31	0.052114	0.196113	PFKP;GLA;GALM;B4GALT2;GALE;PFKM;UGP2;PGM2
Ubiquinone and other terpenoid-quinone biosynthesis	4/11	0.0517594	0.196113	COQ3;NQO1;VKORC1L1;COQ5
Arginine biosynthesis	6/21	0.0567155	0.207957	GOT2;ARG2;GPT2;ASS1;GLS;GOT1
Complement and coagulation cascades	16/79	0.0664881	0.231898	C1R;A2M;CD59;C2;CLU;SERPINE1;F8;C1QA;TFPI;C3AR1;PLAT;C1QC;VSIG4;SERPING1;C1QB;CFB
Fatty acid elongation	7/27	0.0657185	0.231898	HSD17B12;ELOVL3;ACOT7;ACOT2;TECR;HACD3;MECR
Fructose and mannose metabolism	8/33	0.0718481	0.238937	PMM1;TSTA3;PMM2;PFKP;GMDS;PFKM;GMPPA;GMPPB
Phenylalanine metabolism	5/17	0.0712955	0.238937	GOT2;MIF;AOC3;GOT1;IL4I1
AMPK signaling pathway	22/120	0.090179	0.293082	PPP2CA;IGF1;HMGCR;RPS6KB2;IRS1;PPP2R1B;PPP2R2A;ACACA;PPARG;RAB10;PFKM;CCNA2;ELAVL1;PRKAG1;CCNA1;CREB3;PFKP;CREB3L2;RAB8A;TBC1D1;SCD;PCK2
Cysteine and methionine metabolism	10/47	0.0996263	0.303722	GOT2;DNMT1;APIP;GOT1;LDHA;DNMT3B;IL4I1;MDH1;SRM;CTH
Ether lipid metabolism	10/47	0.0996263	0.303722	UGT8;PLA2G16;PAFAH1B3;ENPP2;ENPP6;AGPS;PLA2G2D;PLA2G2C;LPCAT4;PLA2G4A
Lysine degradation	12/59	0.0998247	0.303722	PLOD3;ALDH7A1;SUV39H2;ACAT2;SUV39H1;EZH2;DHTKD1;ACAT1;DLD;EHHADH;ALDH1B1;SETDB2
FoxO signaling pathway	23/132	0.129271	0.369714	PRMT1;KRAS;CCNB1;IGF1;CDK2;IL6;IRS1;NRAS;PLK1;SOS1;CHUK;IL10;SKP2;PLK4;PRKAG1;CCNB2;CCND2;TNFSF10;CSNK1E;PCK2;MAPK12;NLK;MDM2
IL-17 signaling pathway	17/93	0.126978	0.369714	TBK1;S100A8;CXCL10;HSP90B1;FADD;CASP3;LCN2;MAPK6;CCL2;CHUK;HSP90AB1;ELAVL1;FOSL1;TRAF2;MAPK12;IL6;SRSF1
PPAR signaling pathway	14/74	0.126854	0.369714	CPT2;ACOX2;SLC27A2;SCP2;NR1H3;ACSBG1;ACADM;ACSL1;PPARG;FABP5;SCD;EHHADH;PCK2;ACSL4
Folate biosynthesis	6/26	0.134141	0.370268	MOCS2;CBR1;DHFR;GGH;GPHN;GCH1
Glutathione metabolism	11/56	0.134643	0.370268	IDH2;LAP3;IDH1;CHAC1;GPX7;CHAC2;RRM1;SRM;RRM2;ODC1;MGST1
Thiamine metabolism	4/15	0.138	0.372341	AK4;NFS1;AK2;THTPA
Antigen processing and presentation	14/77	0.160015	0.415778	B2M;PSME3;TAP1;PDIA3;CTSL;CALR;RFX5;HSPA4;HSPA5;HSP90AB1;CANX;PSME2;LGMN;TAP2
B cell receptor signaling pathway	13/71	0.164883	0.415778	VAV1;KRAS;BTK;PLCG2;NRAS;RASGRP3;PPP3CC;SOS1;IFITM1;BLNK;CHUK;CD19;FCGR2B
C-type lectin receptor signaling pathway	18/104	0.171545	0.415778	STAT1;PRKCD;KRAS;STAT2;IRF9;RRAS;IL12A;NRAS;PLCG2;PPP3CC;CLEC1B;PTPN11;CHUK;IL10;MAPK12;IL6;CALML4;MDM2
PI3K-Akt signaling pathway	55/354	0.168288	0.415778	ITGA3;COL9A3;TNN;JAK2;KRAS;HSP90B1;CDK6;PPP2CA;CD19;BRCA1;GNGT2;IGF1;CDK2;ITGA7;FN1;IL6;RPS6KB2;ITGA1;YWHAH;IRS1;IFNAR2;CCNE2;NRAS;PPP2R1B;SOS1;GNG7;ITGA8;CHUK;IFNAR1;SPP1;ITGA4;YWHAG;PPP2R2A;LAMA5;GNB4;ITGB7;EIF4E;LAMC1;HSP90AB1;BCL2L1;MYB;FLT1;YWHAE;CCND2;CREB3;CDK4;CREB3L2;CCNE1;COL4A4;GNG5;PCK2;PIK3CG;ITGB1;MET;MDM2
TNF signaling pathway	19/110	0.165827	0.415778	CASP3;CCL2;MAP2K6;TRAF2;IL6;FADD;CASP10;ITCH;CHUK;MLKL;PGAM5;CASP7;DNM1L;CXCL10;DAB2IP;CREB3;CREB3L2;MAPK12;CFLAR
Toll-like receptor signaling pathway	18/104	0.171545	0.415778	STAT1;IL6;TLR7;IRF7;IFNAR2;CXCL10;FADD;IL12A;CD40;CHUK;CXCL9;IFNAR1;MAP2K6;SPP1;TBK1;MAPK12;CD80;CXCL11
Linoleic acid metabolism	6/29	0.196187	0.459914	PLA2G16;CYP2C8;PLA2G2C;PLA2G2D;CYP2J2;PLA2G4A
Primary bile acid biosynthesis	4/17	0.194071	0.459914	ACOX2;HSD17B4;HSD3B7;SCP2
HIF-1 signaling pathway	17/100	0.200239	0.461841	PDK1;SERPINE1;PLCG2;PDHB;IFNGR2;CUL2;RBX1;TF;EIF4E;PDHA1;LDHA;ENO1;GAPDH;IGF1;IL6;RPS6KB2;FLT1
Nicotinate and nicotinamide metabolism	6/30	0.218911	0.467698	NUDT12;PNP;NT5C3A;CD38;NNT;NT5C2
Ovarian steroidogenesis	9/49	0.219131	0.467698	HSD17B7;CYP19A1;ACOT2;BMP6;CYP2J2;IGF1;LDLR;ADCY3;PLA2G4A
Pentose phosphate pathway	6/30	0.218911	0.467698	PFKP;RPE;DERA;PRPS2;PFKM;PGM2
Porphyrin and chlorophyll metabolism	8/42	0.207686	0.467698	EARS2;ALAS1;EPRS;COX10;COX15;HMBS;UGT2B17;BLVRA
Tyrosine metabolism	7/36	0.213577	0.467698	GOT2;MIF;LRTOMT;AOC3;GOT1;IL4I1;ADH5
Mucin type O-glycan biosynthesis	6/31	0.242458	0.509875	GALNT18;GCNT1;C1GALT1;GALNT14;C1GALT1C1;GALNT2
mTOR signaling pathway	24/152	0.252918	0.524163	WNT10A;KRAS;ATP6V1A;SEH1L;IGF1;FZD5;RPS6KB2;MIOS;IRS1;NRAS;SOS1;CHUK;FZD3;ATP6V1H;FZD7;SLC7A5;SKP2;ATP6V1C1;EIF4E;ATP6V1D;WNT11;TBC1D7;SEC13;WNT5B
Riboflavin metabolism	2/8	0.30029	0.61345	FLAD1;ACP2
Hippo signaling pathway	24/160	0.343258	0.69135	WNT10A;TCF7L1;PPP2CA;BIRC5;BMP6;FZD5;YWHAH;PPP2R1B;FZD3;TP73;YWHAG;PPP2R2A;LIMD1;FZD7;SERPINE1;ID1;PPP1CC;BMP8B;WNT11;PRKCI;YWHAE;CCND2;CSNK1E;WNT5B
Other types of O-glycan biosynthesis	4/22	0.353555	0.692844	B4GALT2;PLOD3;B4GALT3;ST6GAL1
Sulfur metabolism	2/9	0.35369	0.692844	BPNT1;PAPSS1
Circadian rhythm	5/31	0.419985	0.803831	BHLHE41;CSNK1E;RBX1;CUL1;PRKAG1
Longevity regulating pathway	15/102	0.42159	0.803831	KRAS;IRS1;CREB3L2;CREB3;NRAS;HDAC2;PPARG;ATG5;EIF4E;CLPB;ATG101;IGF1;PRKAG1;RPS6KB2;ADCY3
Thyroid hormone synthesis	11/74	0.43123	0.811394	CREB3;HSP90B1;PDIA4;CREB3L2;GPX7;ATP1B2;HSPA5;TSHR;CANX;ADCY3;TTF2
Glycerolipid metabolism	9/61	0.457002	0.827231	ALDH7A1;LPIN3;GLA;MGLL;AGPAT5;AGK;AKR1A1;GPAT2;ALDH1B1
Other glycan degradation	3/18	0.454183	0.827231	GBA;NEU1;FUCA2
alpha-Linolenic acid metabolism	4/25	0.451438	0.827231	PLA2G2C;PLA2G2D;PLA2G4A;PLA2G16
Adipocytokine signaling pathway	10/69	0.472432	0.831235	IRS1;JAK2;ACSBG1;ACSL1;PTPN11;PCK2;CHUK;TRAF2;PRKAG1;ACSL4
Fc gamma R-mediated phagocytosis	13/91	0.476652	0.831235	PRKCD;VAV1;PLCG2;FCGR1A;PIP5K1B;MARCKS;ARPC1A;DNM2;FCGR2B;SCIN;RPS6KB2;PLA2G4A;NCF1
Sphingolipid metabolism	7/47	0.465646	0.831235	NEU1;UGT8;ARSA;GLA;ENPP7;GBA;SPTLC1
Apelin signaling pathway	19/137	0.509203	0.835841	KRAS;GNGT2;RPS6KB2;ADCY3;RRAS;NRAS;GNG7;MYLK2;SPP1;TFAM;SERPINE1;GNB4;PRKAG1;CALML4;MYL4;ACTA2;PLAT;GNG5;PIK3CG
Ascorbate and aldarate metabolism	4/27	0.51399	0.835841	ALDH1B1;UGT2B17;ALDH7A1;UGDH
Caffeine metabolism	1/5	0.520209	0.835841	NAT1
D-Glutamine and D-glutamate metabolism	1/5	0.520209	0.835841	GLS
Pantothenate and CoA biosynthesis	3/19	0.491389	0.835841	COASY;AASDHPPT;PPCDC
Pentose and glucuronate interconversions	5/34	0.503904	0.835841	RPE;UGDH;UGP2;AKR1A1;UGT2B17
Prolactin signaling pathway	10/70	0.491543	0.835841	STAT1;SHC1;CCND2;KRAS;JAK2;NRAS;SOS1;ESR1;CISH;MAPK12
Natural killer cell mediated cytotoxicity	18/131	0.527805	0.838624	SHC1;VAV1;FCGR3B;KRAS;IFNAR2;TNFSF10;CASP3;NRAS;IFNGR2;PLCG2;PPP3CC;SOS1;PTPN11;IFNAR1;PTK2B;ICAM2;MICB;GZMB
NF-kappa B signaling pathway	13/95	0.542461	0.852439	ERC1;DDX58;BTK;PLCG2;TRIM25;CD40;PARP1;BLNK;CHUK;TRAF2;BCL2L1;CFLAR;CSNK2A1
Glucagon signaling pathway	14/103	0.551458	0.857157	PRMT1;PHKA1;CREB3;PGAM1;CREB3L2;PPP4C;PDHB;ACACA;PPP3CC;PDHA1;LDHA;PCK2;PRKAG1;CALML4
Inositol phosphate metabolism	10/74	0.565871	0.870102	MINPP1;PLCG2;PI4K2B;PIP5K1B;PIK3C2A;MTMR2;PIK3CG;IMPA1;ALDH6A1;IPPK
ABC transporters	6/45	0.591047	0.884931	TAP1;ABCB8;ABCB9;ABCC2;DEFB1;TAP2
Fc epsilon RI signaling pathway	9/68	0.59408	0.884931	VAV1;KRAS;BTK;PLCG2;NRAS;SOS1;MAP2K6;MAPK12;PLA2G4A
TGF-beta signaling pathway	12/90	0.582485	0.884931	PPP2CA;ID1;RBX1;PPP2R1B;RBL1;BMP6;LEFTY2;CUL1;TFDP1;BMP8B;RPS6KB2;E2F5
Cytokine-cytokine receptor interaction	39/294	0.604354	0.890954	CCR5;CCL1;IL1RN;EDA2R;TNFRSF13B;CCL2;CXCR3;BMP6;CCR2;CXCL9;IL6;CXCL11;CD27;IFNAR2;IL12A;CCL8;IL10;IFNAR1;CTF1;ACVRL1;CCR3;CXCL10;IFNGR2;CCR1;IL15RA;MSTN;BMP8B;IL27;CD70;IFNLR1;CCR9;TNFSF10;TNFRSF17;CCL25;CD40;XCR1;CCR10;CXCR6;IL12RB1
Histidine metabolism	3/23	0.62583	0.903977	ALDH1B1;CNDP2;ALDH7A1
Renin-angiotensin system	3/23	0.62583	0.903977	THOP1;NLN;PREP
Melanogenesis	13/101	0.635099	0.908192	WNT10A;FZD7;TCF7L1;KRAS;CREB3;CREB3L2;NRAS;CALML4;FZD3;FZD5;WNT11;ADCY3;WNT5B
Arachidonic acid metabolism	8/63	0.64331	0.910825	CBR1;PLA2G16;CYP2C8;GPX7;PLA2G2D;PLA2G2C;CYP2J2;PLA2G4A
Wnt signaling pathway	20/158	0.677988	0.950513	WNT10A;TCF7L1;SENP2;PPP3CC;CSNK2A1;FZD5;RBX1;FZD3;PRICKLE1;FZD7;RUVBL1;CUL1;ROR2;WNT11;CCND2;CSNK1E;FOSL1;NLK;CACYBP;WNT5B
Aldosterone synthesis and secretion	7/98	0.985438	1	CREB3;CREB3L2;PRKD2;ATP1B2;CALML4;LDLR;ADCY3
Calcium signaling pathway	17/188	0.979642	1	PHKA1;PLCG2;ATP2A2;VDAC3;CD38;OXTR;SLC25A4;PPP3CC;CALML4;VDAC1;MYLK2;MCU;PTK2B;CYSLTR1;HTR4;P2RX5;ADCY3
Cell adhesion molecules (CAMs)	16/145	0.852883	1	MPZ;SELL;SIGLEC1;SDC3;CTLA4;ICAM2;CADM1;CD40;ITGB7;CD274;ITGA8;PDCD1LG2;SDC1;ITGA4;ITGB1;CD80
Circadian entrainment	6/97	0.994052	1	ADCY3;GNB4;GNG7;GNGT2;GNG5;CALML4
Cortisol synthesis and secretion	4/65	0.98323	1	LDLR;CREB3L2;ADCY3;CREB3
ErbB signaling pathway	7/85	0.955334	1	SHC1;KRAS;PLCG2;NRAS;GAB1;SOS1;RPS6KB2
Estrogen signaling pathway	14/137	0.907663	1	SHC1;PRKCD;NCOA3;EBAG9;KRAS;CREB3;CREB3L2;HSP90B1;NRAS;SOS1;CALML4;ESR1;HSP90AB1;ADCY3
Glycerophospholipid metabolism	10/97	0.869206	1	PLA2G16;LPIN3;ETNK1;GPD2;PLA2G2D;PLA2G2C;AGPAT5;GPAT2;LPCAT4;PLA2G4A
GnRH signaling pathway	10/93	0.833596	1	PRKCD;KRAS;NRAS;SOS1;CALML4;PTK2B;MAP2K6;MAPK12;ADCY3;PLA2G4A
Hedgehog signaling pathway	3/47	0.964469	1	CSNK1E;CCND2;CUL1
Hematopoietic cell lineage	8/97	0.963487	1	ITGA3;ITGA1;CD59;FCGR1A;CD38;CD19;ITGA4;IL6
Insulin secretion	8/86	0.915422	1	CREB3;CREB3L2;ATP1B2;KCNN3;KCNMB3;TRPM4;ADCY3;KCNMA1
Insulin signaling pathway	16/137	0.785588	1	SHC1;PRKCI;PHKA1;KRAS;IRS1;NRAS;ACACA;SOS1;PCK2;EIF4E;PTPN1;PPP1CC;PRKAG1;SH2B2;RPS6KB2;CALML4
Leukocyte transendothelial migration	9/112	0.976406	1	ITGB1;VAV1;ITGA4;PLCG2;PTPN11;PTK2B;MAPK12;RAPGEF3;NCF1
MAPK signaling pathway	24/295	0.998854	1	KRAS;CASP3;PPP3CC;MAP2K6;IGF1;TRAF2;PPP5C;RRAS;NRAS;PTPN7;RASGRP3;DUSP6;SOS1;CHUK;DAXX;NLK;FLT1;STMN1;MAP3K13;DUSP5;MAPK12;MET;RAPGEF2;PLA2G4A
Mannose type O-glycan biosynthesis	2/23	0.841884	1	B4GALT2;B4GALT3
Metabolism of xenobiotics by cytochrome P450	4/74	0.993642	1	UGT2B17;CBR1;MGST1;ADH5
Neuroactive ligand-receptor interaction	15/338	1	1	GIPR;P2RY6;GABRR2;GRIN3A;CHRNB1;OXTR;FPR2;C3AR1;TSHR;CHRNA5;ADM;SSTR3;CYSLTR1;HTR4;P2RX5
Nitrogen metabolism	1/17	0.917727	1	CA1
Notch signaling pathway	3/48	0.968176	1	PSEN2;HDAC2;DTX3L
Oxytocin signaling pathway	13/153	0.981652	1	KRAS;PIK3CG;NRAS;CD38;OXTR;PPP3CC;CALML4;MYLK2;PPP1CC;PRKAG1;MYL6B;ADCY3;PLA2G4A
Parathyroid hormone synthesis, secretion and action	5/106	0.999316	1	CREB3;CREB3L2;VDR;CYP27B1;ADCY3
Phosphatidylinositol signaling system	8/99	0.968924	1	PLCG2;PI4K2B;PIP5K1B;PIK3C2A;MTMR2;IMPA1;CALML4;IPPK
Phospholipase D signaling pathway	18/148	0.737369	1	SHC1;KRAS;PLCG2;RRAS;NRAS;GAB1;ARF1;PIP5K1B;SOS1;DNM2;PTPN11;DNM1;AGPAT5;PTK2B;PIK3CG;RAPGEF3;ADCY3;PLA2G4A
Platelet activation	11/124	0.960942	1	PRKCI;BTK;PLCG2;PIK3CG;MYLK2;P2RY12;PPP1CC;MAPK12;ITGB1;ADCY3;PLA2G4A
Rap1 signaling pathway	19/206	0.979772	1	KRAS;MAP2K6;IGF1;ADCY3;RRAS;NRAS;RASGRP3;ID1;CALML4;FLT1;PRKCI;FARP2;PRKD2;RAPGEF3;RAPGEF5;MAPK12;ITGB1;MET;RAPGEF2
Ras signaling pathway	26/232	0.885089	1	SHC1;KRAS;PLA2G2D;GNGT2;IGF1;RGL1;RRAS;NRAS;RASGRP3;SOS1;GNG7;CHUK;GNB4;GAB1;PTPN11;TBK1;BCL2L1;CALML4;FLT1;PLA2G16;PLCG2;RAPGEF5;PLA2G2C;GNG5;MET;PLA2G4A
Regulation of lipolysis in adipocytes	5/55	0.887204	1	IRS1;PLA2G16;MGLL;TSHR;ADCY3
Relaxin signaling pathway	14/130	0.863987	1	SHC1;KRAS;GNB4;CREB3L2;CREB3;NRAS;ACTA2;SOS1;COL4A4;GNG7;GNGT2;GNG5;MAPK12;ADCY3
Renin secretion	3/69	0.997225	1	KCNMA1;CALML4;PPP3CC
Retinol metabolism	4/67	0.986432	1	CYP2C8;UGT2B17;HSD17B6;ADH5
Sphingolipid signaling pathway	8/119	0.994503	1	KRAS;PPP2CA;NRAS;PPP2R1B;TRAF2;MAPK12;PPP2R2A;SPTLC1
Starch and sucrose metabolism	3/36	0.886631	1	PGM2;GYG1;UGP2
Steroid hormone biosynthesis	7/60	0.729029	1	HSD17B8;HSD17B12;HSD17B7;LRTOMT;CYP19A1;HSD17B6;UGT2B17
T cell receptor signaling pathway	10/101	0.898412	1	VAV1;CTLA4;KRAS;CDK4;NRAS;PPP3CC;SOS1;CHUK;IL10;MAPK12
Th1 and Th2 cell differentiation	8/92	0.945963	1	STAT1;JAK2;IL12A;IFNGR2;PPP3CC;CHUK;MAPK12;IL12RB1
Th17 cell differentiation	10/107	0.931897	1	STAT1;IL6;JAK2;IRF4;IFNGR2;PPP3CC;CHUK;HSP90AB1;MAPK12;IL12RB1
Thyroid hormone signaling pathway	12/116	0.883763	1	STAT1;NCOA3;KRAS;PFKP;ATP2A2;HDAC2;NRAS;PLCG2;ATP1B2;ESR1;MED27;MDM2
VEGF signaling pathway	6/59	0.834237	1	KRAS;PLCG2;NRAS;PPP3CC;MAPK12;PLA2G4A
cAMP signaling pathway	16/212	0.998141	1	VAV1;GIPR;CREB3;CREB3L2;ATP2A2;RRAS;GRIN3A;OXTR;ATP1B2;TSHR;CALML4;FFAR2;PPP1CC;RAPGEF3;HTR4;ADCY3
cGMP-PKG signaling pathway	17/166	0.923946	1	GTF2I;IRS1;CREB3;CREB3L2;ATP2A2;VDAC3;SLC25A4;ATP1B2;KCNMB3;PPP3CC;VDAC1;MYLK2;CALML4;PPP1CC;PIK3CG;ADCY3;KCNMA1

## Sheet: Cluster2
Term	Overlap	P-value	Adjusted P-value	Genes
Hematopoietic cell lineage	45/97	2.54463e-15	3.4607e-13	HLA-DQA1;CSF2RA;CD8A;CD7;IL11RA;HLA-DQB1;GP5;CD2;CSF3R;CD5;CD44;IL1A;ITGA6;MME;FLT3LG;CD1B;HLA-DPB1;IL7R;KIT;HLA-DOA;CD22;CD1C;CD3E;IL1R1;EPOR;HLA-DMA;CD3D;FCER2;ITGA5;HLA-DRB1;ITGA2B;HLA-DMB;CD3G;CSF1R;CD8B;CD37;CD1E;HLA-DRA;IL4R;MS4A1;CD4;HLA-DQA2;ANPEP;HLA-DPA1;CD24
Th17 cell differentiation	45/107	2.09998e-13	1.42799e-11	NFATC3;HLA-DQA1;CD247;RUNX1;TGFB1;NFATC1;HLA-DQB1;PPP3R1;LAT;RARA;IL2RB;RXRA;NFATC2;JAK1;HLA-DPB1;HLA-DOA;CD3E;GATA3;IL1R1;PPP3CA;RELA;IL23A;SMAD4;HLA-DMA;ZAP70;CD3D;MAPK1;HLA-DRB1;TGFBR1;HLA-DMB;TGFBR2;AHR;TBX21;PRKCQ;CD3G;PLCG1;STAT5A;HLA-DRA;IL4R;LCK;RORA;CD4;HLA-DQA2;HLA-DPA1;SMAD2
Th1 and Th2 cell differentiation	40/92	1.22727e-12	5.56364e-11	NFATC3;HLA-DQA1;CD247;NFATC1;HLA-DQB1;RUNX3;PPP3R1;LAT;IL2RB;NFATC2;NOTCH2;JAK1;HLA-DPB1;HLA-DOA;CD3E;GATA3;PPP3CA;RELA;NOTCH1;MAML3;HLA-DMA;RBPJ;ZAP70;CD3D;MAPK1;HLA-DRB1;HLA-DMB;PRKCQ;TBX21;STAT4;CD3G;PLCG1;STAT5A;HLA-DRA;IL4R;LCK;CD4;HLA-DQA2;MAML2;HLA-DPA1
Cell adhesion molecules (CAMs)	44/145	7.4499e-08	2.29663e-06	HLA-DQA1;CNTNAP2;CD8A;CLDN5;HLA-DQB1;HLA-E;CD2;HLA-F;ICAM3;ITGA6;HLA-DPB1;CD99;CD6;HLA-DOA;ITGB2;PECAM1;CD22;TIGIT;VCAN;SPN;CLDN11;PVR;HLA-DMA;CD28;NCAM1;F11R;NEO1;HLA-DRB1;CD226;HLA-DMB;JAM3;SDC2;SELP;CD8B;ICOSLG;SELPLG;ICAM1;HLA-DRA;NLGN2;CD4;NEGR1;HLA-DQA2;NRCAM;HLA-DPA1
MAPK signaling pathway	73/295	8.4435e-08	2.29663e-06	ARRB2;NFATC3;MAP2K3;FGFR2;ARRB1;TGFB1;NFATC1;INSR;RASGRP4;ERBB2;PPP3R1;PRKACB;IL1A;MKNK2;FLT4;MAP3K14;MAP4K4;DUSP10;CACNB1;FGFR1;MAPK7;CACNA2D4;AREG;PRKCB;EREG;FLT3LG;EFNA5;TGFB2;CACNA1I;JUND;MAP2K5;KIT;ANGPT1;DUSP8;DUSP4;MAP3K3;FGF9;CACNA2D2;IL1R1;DUSP16;PPP3CA;RASGRP2;RELA;MAP4K2;MRAS;EFNA1;RPS6KA5;PDGFC;ARAF;MAPK1;AKT3;MAP3K4;TGFBR1;PDGFRB;GADD45B;NR4A1;GNA12;TGFA;TGFBR2;RPS6KA2;CSF1R;NGFR;RAS…
Antigen processing and presentation	27/77	1.07618e-06	2.43933e-05	HLA-DQA1;CD8A;HLA-DQB1;HLA-E;HLA-F;KLRD1;KLRC4;HLA-DPB1;KLRC3;CTSS;HLA-DOA;KIR3DL1;CIITA;HLA-DMA;KLRC2;HLA-DRB1;HLA-DMB;CD8B;KIR2DL1;KIR3DL2;KLRC1;HLA-DRA;CD74;KIR2DL3;CD4;HLA-DQA2;HLA-DPA1
T cell receptor signaling pathway	32/101	1.50906e-06	2.93188e-05	NFATC3;MALT1;CD247;CD8A;NFATC1;PPP3R1;LAT;VAV2;MAP3K14;PIK3R1;PIK3CD;ITK;NFATC2;PAK3;CD3E;PPP3CA;RELA;ZAP70;NCK2;CD28;CD3D;MAPK1;AKT3;PRKCQ;CD3G;PLCG1;CD8B;RASGRP1;FYN;LCK;GRAP2;CD4
Ras signaling pathway	55/232	1.2289e-05	0.000208913	ETS1;RASSF1;FGFR2;TIAM1;KSR1;INSR;RASGRP4;PRKACB;RASSF5;LAT;PLD2;FLT4;PIK3R1;GNG11;PIK3CD;FGFR1;PRKCB;RASAL2;FLT3LG;EFNA5;PAK3;ANGPT1;KIT;FGF9;GNG2;ETS2;RELA;RASGRP2;RASAL3;GNB2;MRAS;EFNA1;REL;ZAP70;GAB2;PDGFC;PLD1;GNB5;MAPK1;AKT3;PDGFRB;TGFA;RASA4;RASA3;RALB;PLCG1;NGFR;RASGRP1;CSF1R;IGF1R;PRKCA;VEGFB;RASGRF2;FOXO4;HTR7
Natural killer cell mediated cytotoxicity	35/131	3.4041e-05	0.000514397	CD247;KLRC4-KLRK1;NFATC1;HLA-E;PPP3R1;LAT;VAV2;FCGR3A;KLRD1;PIK3R1;PIK3CD;PRKCB;CD244;NCR1;NFATC2;KLRC3;ITGB2;KIR3DL1;PPP3CA;ZAP70;ARAF;KLRC2;MAPK1;NCR3;SH2D1B;PLCG1;KIR2DL1;BID;KIR3DL2;KLRC1;FYN;ICAM1;PRKCA;LCK;KIR2DL3
Cytokine-cytokine receptor interaction	63/294	8.24417e-05	0.00110834	TNFRSF25;CXCR5;CSF2RA;LTA;TNFRSF21;CCL5;TGFB1;IL11RA;CSF3R;CCR7;IL18RAP;IL1A;TNFRSF13C;IL2RB;TNFSF8;CLCF1;TNFSF12;LTB;CXCR1;CCL28;GDF7;EDAR;CCR4;PF4V1;TNFRSF10C;TGFB2;IL7R;PRLR;TNFRSF14;IL10RA;IL18R1;OSM;TNFRSF10D;IL1R1;IL16;EPOR;PF4;IL23A;XCL1;RELT;GDF11;CXCR4;CXCL16;TNFRSF1B;TGFBR1;EDA;TGFBR2;XCL2;CCL4;IL13RA1;TNFRSF9;NGFR;CSF1R;TNFSF11;IL4R;TGFB3;CXCL8;CD4;TNFRSF8;PPBP;ACVR2A;ACVR2B;TNFSF14
Intestinal immune network for IgA production	17/48	8.96455e-05	0.00110834	MAP3K14;HLA-DPA1;TNFRSF13C;HLA-DQA1;ICOSLG;TGFB1;HLA-DMA;HLA-DRA;HLA-DQB1;CCL28;CD28;HLA-DPB1;CXCR4;HLA-DQA2;HLA-DRB1;HLA-DMB;HLA-DOA
Parathyroid hormone synthesis, secretion and action	29/106	9.79082e-05	0.00110963	ARRB2;ARRB1;GCM1;ADCY9;PDE4D;PDE4A;PRKACB;PLD2;HBEGF;FGFR1;ARHGEF1;RXRA;PRKCB;GNAQ;MMP25;JUND;GATA3;BCL2;NR4A2;NACA;SLC9A3R1;ARAF;PLD1;MAPK1;GNA12;TNFSF11;KL;PRKCA;PLCB1
FoxO signaling pathway	33/132	0.000223293	0.00216913	IRS2;TGFB1;FOXO3;CCNG2;INSR;CDKN2D;PIK3R1;HOMER3;PIK3CD;FOXO1;HOMER2;TGFB2;IL7R;SOD2;SMAD4;KLF2;ARAF;MAPK1;AKT3;TGFBR1;GADD45B;CREBBP;TGFBR2;FBXO32;ATM;PRKAA1;IGF1R;GABARAPL1;TGFB3;SETD7;FOXO4;CDKN1B;SMAD2
NF-kappa B signaling pathway	26/95	0.000217973	0.00216913	MALT1;LTA;TRAF5;LAT;MAP3K14;TNFRSF13C;TRAF1;PRKCB;LTB;LYN;PTGS2;IL1R1;BCL2;RELA;ZAP70;GADD45B;PRKCQ;CCL4;PLCG1;ATM;TNFSF11;ICAM1;BIRC3;LCK;CXCL8;TNFSF14
Fc gamma R-mediated phagocytosis	25/91	0.000267885	0.00235312	FCGR2A;ASAP1;LAT;PLD2;VAV2;HCK;FCGR3A;PIK3R1;WASF2;PIK3CD;PRKCB;ASAP2;WASL;LYN;INPP5D;VASP;GAB2;MARCKSL1;PLD1;MAPK1;AKT3;PIP5K1C;PLCG1;BIN1;PRKCA
Leukocyte transendothelial migration	29/112	0.000276838	0.00235312	SIPA1;TXK;CLDN5;MYL5;RASSF5;VAV2;PIK3R1;PIK3CD;PRKCB;PXN;ITK;CD99;ITGB2;PECAM1;VCL;CLDN11;ACTN1;VASP;MMP9;CXCR4;F11R;MYL9;JAM3;ARHGAP35;MYLPF;PLCG1;ICAM1;PRKCA;CTNNB1
Phospholipase D signaling pathway	35/148	0.000457372	0.00365897	AGPAT4;DGKE;CYTH4;PIK3R5;ADCY9;DGKG;CYTH3;INSR;PLD2;LPAR2;PIK3R1;PIK3CD;DGKA;CXCR1;DGKK;KIT;DGKD;MRAS;GRM2;LPAR6;GAB2;PDGFC;PLD1;MAPK1;FCER1A;AKT3;PDGFRB;GNA12;RALB;PIP5K1C;PLCG1;FYN;PRKCA;CXCL8;PLCB1
HIF-1 signaling pathway	26/100	0.000521769	0.00373477	CAMK2G;INSR;ERBB2;HK1;ENO2;MKNK2;ENO3;PIK3R1;PIK3CD;PRKCB;HKDC1;ANGPT1;RPS6;BCL2;RELA;EGLN3;MAPK1;PFKFB3;AKT3;CREBBP;PLCG1;IGF1R;VHL;PRKCA;EGLN2;CDKN1B
Rap1 signaling pathway	45/206	0.000517434	0.00373477	SIPA1;MAP2K3;FGFR2;TIAM1;ARAP3;ADCY9;INSR;GNAO1;RASSF5;LAT;VAV2;LPAR2;FLT4;PIK3R1;RAPGEF6;PIK3CD;FGFR1;PRKCB;GNAQ;EFNA5;ANGPT1;KIT;ITGB2;SKAP1;FGF9;RASGRP2;MRAS;VASP;EFNA1;PFN2;PDGFC;MAPK1;AKT3;ITGA2B;THBS1;PDGFRB;RALB;PLCG1;NGFR;CSF1R;IGF1R;PRKCA;VEGFB;CTNNB1;PLCB1
Chemokine signaling pathway	42/190	0.000604286	0.00410914	ARRB2;CXCR5;TIAM1;ARRB1;CCL5;PIK3R5;FOXO3;ADCY9;CCR7;PRKACB;VAV2;HCK;PIK3R1;GNG11;PIK3CD;PRKCB;PXN;CXCR1;ITK;CCL28;CCR4;WASL;PF4V1;LYN;PREX1;FGR;GNG2;PF4;RELA;RASGRP2;GNB2;XCL1;GNB5;CXCR4;MAPK1;AKT3;CXCL16;XCL2;CCL4;CXCL8;PPBP;PLCB1
Notch signaling pathway	15/48	0.00104812	0.00647928	NCOR2;NOTCH1;MAML3;NUMB;RBPJ;NUMBL;DTX4;LFNG;NOTCH2;RFNG;CTBP2;MFNG;MAML2;APH1B;CREBBP
Phosphatidylinositol signaling system	25/99	0.00104621	0.00647928	DGKE;CDIPT;PIP4K2A;DGKG;INPP4B;CDS1;PLCD1;MTMR3;INPP5E;PIK3R1;PIK3CD;DGKA;PRKCB;DGKK;INPP5D;DGKD;MTMR14;INPP5A;PIP5K1C;PLCG1;PIK3C2B;INPP5K;PRKCA;ITPKB;PLCB1
PI3K-Akt signaling pathway	68/354	0.00116109	0.0068656	EIF4B;FGFR2;PPP2R5C;PIK3R5;FOXO3;INSR;ERBB2;CSF3R;COL6A1;LPAR2;FLT4;PIK3R1;ITGA6;GNG11;PPP2R2B;FGFR1;IL2RB;PIK3CD;AREG;RXRA;EREG;PPP2R5A;JAK1;FLT3LG;EFNA5;IL7R;PRLR;ANGPT1;KIT;OSM;VWF;ITGB5;DDIT4;PHLPP1;GNG2;FGF9;BCL2;EPOR;RPS6;RELA;GNB2;EFNA1;LPAR6;COL6A2;PDGFC;LAMB2;TNXB;ITGA5;GNB5;MAPK1;AKT3;PDGFRB;PHLPP2;THBS1;NR4A1;TGFA;ITGA2B;CSF1R;NGFR;IGF1R;PRKAA1;THEM4;IL4R;PRKCA;VEGFB;CRTC2;TNR;CDKN1B
Sphingolipid signaling pathway	28/119	0.00174658	0.00989731	SGMS2;PPP2R5C;DEGS2;S1PR5;PLD2;PIK3R1;SGPL1;PPP2R2B;PIK3CD;PRKCB;GNAQ;PPP2R5A;ACER1;BCL2;RELA;ASAH1;GAB2;PLD1;MAPK1;FCER1A;AKT3;GNA12;CERS4;BID;FYN;PRKCA;DEGS1;PLCB1
Platelet activation	28/124	0.00330216	0.0179638	FCGR2A;PIK3R5;ADCY9;GP5;ORAI1;PRKACB;MYLK4;PIK3R1;PIK3CD;ARHGEF1;GNAQ;LYN;PTGIR;PPP1R12A;PRKG2;STIM1;VWF;PTGS1;TBXAS1;RASGRP2;VASP;MAPK1;AKT3;ITGA2B;ARHGAP35;RASGRP1;FYN;PLCB1
Hippo signaling pathway	34/160	0.00373033	0.0195125	RASSF1;TGFB1;RASSF2;NKD1;RASSF6;AXIN1;WNT7A;AMOT;PPP2R2B;DLG2;AREG;FAT4;GDF7;FZD1;TGFB2;WNT10B;RASSF4;ITGB2;WNT2B;SMAD4;LEF1;TCF7;DCHS1;TGFBR1;LLGL2;TGFBR2;MOB1B;DLG4;TGFB3;WNT3;CTNNB1;SMAD7;AXIN2;SMAD2
Oxytocin signaling pathway	32/153	0.00613531	0.0309038	NFATC3;CAMK2G;RGS2;PIK3R5;ADCY9;NFATC1;GNAO1;PPP3R1;PRKACB;MYLK4;CAMK4;CACNB1;MAPK7;CACNA2D4;PRKCB;GNAQ;NFATC2;PPP1R12A;PTGS2;MAP2K5;KCNJ14;CACNA2D2;PPP3CA;MAPK1;MYL9;CAMK1D;RYR1;PRKAA1;EEF2;PRKCA;CACNA2D3;PLCB1
TGF-beta signaling pathway	21/90	0.00682533	0.0331516	TGFB1;GDF7;TGFB2;NOG;RGMB;SMAD4;TGIF1;ZFYVE9;MAPK1;NEO1;THBS1;TGFBR1;CREBBP;TGFBR2;ID3;SMURF2;TGFB3;ACVR2A;ACVR2B;SMAD7;SMAD2
Calcium signaling pathway	37/188	0.00942809	0.0442145	PHKA2;GNA15;CAMK2G;ADCY9;ERBB2;ORAI1;CYSLTR2;PRKACB;PPP3R1;MYLK4;PLCD1;CAMK4;TPCN1;PRKCB;GNAQ;TACR2;CACNA1I;STIM1;PPP3CA;PPIF;ATP2B1;GNAL;CXCR4;PDGFRB;STIM2;CAMK1D;RYR1;ATP2B4;PLCG1;ADRB2;PRKCA;ITPKB;P2RX7;SLC8A1;SLC25A6;PLCB1;HTR7
Wnt signaling pathway	32/158	0.00992612	0.0449984	NFATC3;RYK;GPC4;CAMK2G;NFATC1;PPARD;PPP3R1;PRKACB;AXIN1;WNT7A;AXIN2;CTNNBIP1;PRKCB;NFATC2;LGR6;FZD1;WNT10B;WNT2B;PPP3CA;SMAD4;LEF1;CTBP2;TCF7;CREBBP;FRAT1;SIAH1;PRKCA;WNT3;CTNNB1;NKD1;TBL1X;PLCB1
B cell receptor signaling pathway	17/71	0.0108421	0.0475654	CD22;AKT3;NFATC3;MAPK1;MALT1;PPP3CA;PIK3R1;RELA;INPP5D;PIK3CD;NFATC1;PRKCB;NFATC2;LYN;PPP3R1;LILRB3;VAV2
ErbB signaling pathway	19/85	0.0153937	0.0654231	NRG1;CAMK2G;ERBB2;HBEGF;PIK3R1;PIK3CD;AREG;PRKCB;EREG;PAK3;NCK2;ARAF;MAPK1;AKT3;TGFA;PLCG1;STAT5A;PRKCA;CDKN1B
Inositol phosphate metabolism	17/74	0.0163081	0.0672093	MTMR3;INPP5E;CDIPT;PIP5K1C;PIP4K2A;PLCH2;INPP5D;PIK3CD;PLCG1;PIK3C2B;PLCB1;INPP5K;MTMR14;ITPKB;INPP4B;INPP5A;PLCD1
Circadian rhythm	9/31	0.0170101	0.0680405	PER3;PRKAA1;NPAS2;NR1D1;BHLHE40;RORA;CRY1;FBXL3;PER1
Other types of O-glycan biosynthesis	7/22	0.0205958	0.0800295	COLGALT2;ST3GAL3;B3GLCT;RFNG;LFNG;MFNG;COLGALT1
Other glycan degradation	6/18	0.0250113	0.0944873	FUCA1;MAN2B2;MANBA;NEU4;ENGASE;MAN2C1
AMPK signaling pathway	24/120	0.0266322	0.0953154	PPP2R5C;IRS2;FOXO3;INSR;SCD5;CPT1A;RAB14;PIK3R1;PPP2R2B;MLYCD;PIK3CD;FOXO1;PPP2R5A;ULK1;PFKFB3;AKT3;RAB11B;ACACB;PRKAA1;IGF1R;EEF2;PPARGC1A;PFKFB2;CRTC2
Regulation of lipolysis in adipocytes	13/55	0.0265957	0.0953154	PTGS1;PIK3R1;PIK3CD;ADRB2;IRS2;ADCY9;PNPLA2;INSR;PRKACB;AKT3;PDE3B;PTGS2;PRKG2
Fc epsilon RI signaling pathway	15/68	0.0325142	0.108564	MAPK1;PIK3R1;PLCG1;MAP2K3;PIK3CD;INPP5D;FYN;PRKCA;GAB2;LYN;FCER1A;AKT3;ALOX5AP;LAT;VAV2
TNF signaling pathway	22/110	0.0327287	0.108564	LTA;MAP2K3;TRAF5;JUNB;CCL5;MAP3K14;PIK3R1;CEBPB;TRAF1;PIK3CD;PTGS2;IL18R1;RELA;RPS6KA5;MMP9;BCL3;MAPK1;AKT3;TNFRSF1B;ICAM1;BIRC3;RPS6KA4
Thyroid hormone signaling pathway	23/116	0.0323171	0.108564	SLC16A10;PRKACB;PLCD1;PIK3R1;PIK3CD;FOXO1;RXRA;PRKCB;NOTCH2;NOTCH1;MAPK1;AKT3;THRA;CREBBP;ATP1A3;PLCG1;NCOA1;ATP1A4;PRKCA;TBC1D4;PFKFB2;CTNNB1;PLCB1
Apelin signaling pathway	26/137	0.0392837	0.126351	PIK3R5;ADCY9;PDE3B;PRKACB;MYLK4;CAMK4;GNG11;GNAQ;HDAC4;RPS6;GNG2;GNB2;MRAS;SMAD4;KLF2;GNB5;MAPK1;AKT3;TGFBR1;RYR1;PRKAA1;GABARAPL1;PPARGC1A;SLC8A1;PLCB1;SMAD2
Thiamine metabolism	5/15	0.0399494	0.126351	TPK1;AK5;AK1;ALPL;AK8
Sphingolipid metabolism	11/47	0.0421495	0.13028	SGMS2;CERS4;SGPL1;KDSR;CERK;ASAH1;NEU4;DEGS2;ACER1;B4GALT6;DEGS1
Melanogenesis	20/101	0.0442022	0.132699	CAMK2G;ADCY9;GNAO1;PRKACB;WNT7A;PRKCB;GNAQ;FZD1;WNT10B;KIT;WNT2B;LEF1;TCF7;MC1R;MAPK1;CREBBP;PRKCA;WNT3;CTNNB1;PLCB1
VEGF signaling pathway	13/59	0.0448835	0.132699	AKT3;PPP3CA;PIK3R1;PLCG1;PIK3CD;PRKCB;PXN;PRKCA;NFATC2;SH2D2A;MAPK1;PPP3R1;PTGS2
Longevity regulating pathway	20/102	0.0483406	0.139879	IRS2;FOXO3;ADCY9;INSR;SESN3;PRKACB;CAMK4;PIK3R1;PIK3CD;FOXO1;SOD2;RELA;ULK1;AKT3;PRKAA1;IGF1R;KL;PPARGC1A;SESN1;EIF4EBP2
Circadian entrainment	19/97	0.0537584	0.143356	CAMK2G;ADCY9;GNAO1;PRKACB;GNG11;PRKCB;GNAQ;CACNA1I;PRKG2;PER1;PER3;GNG2;GNB2;RPS6KA5;GNB5;MAPK1;RYR1;PRKCA;PLCB1
Glucagon signaling pathway	20/103	0.052749	0.143356	PHKA2;CAMK2G;SIK2;PPP3R1;PDE3B;PRKACB;CPT1A;FOXO1;PPARA;GNAQ;PYGL;PPP3CA;AKT3;CREBBP;ACACB;PYGM;PRKAA1;PPARGC1A;CRTC2;PLCB1
Glycerophospholipid metabolism	19/97	0.0537584	0.143356	AGPAT4;DGKE;CDIPT;DGKG;CDS1;PLD2;MBOAT7;PGS1;DGKA;ADPRM;DGKK;PLD4;ETNK2;PNPLA7;DGKD;PLD1;MBOAT2;TAZ;LPCAT1
cGMP-PKG signaling pathway	30/166	0.0506464	0.143356	NFATC3;ADRA2B;RGS2;PIK3R5;IRS2;ADCY9;NFATC1;INSR;PPP3R1;PDE3B;MYLK4;GNAQ;NFATC2;PPP1R12A;PRKG2;PPP3CA;PPIF;VASP;ATP2B1;MAPK1;AKT3;MYL9;GNA12;ATP1A3;ATP2B4;ADRB2;ATP1A4;SLC8A1;SLC25A6;PLCB1
C-type lectin receptor signaling pathway	20/104	0.0574343	0.150213	NFATC3;MALT1;KSR1;NFATC1;PPP3R1;MAP3K14;PIK3R1;PIK3CD;NLRP3;NFATC2;PTGS2;PPP3CA;RELA;IL23A;MRAS;BCL3;MAPK1;AKT3;LSP1;CYLD
Insulin signaling pathway	25/137	0.0632212	0.162228	PHKA2;PPP1R3F;IRS2;INSR;PPP1R3E;HK1;PRKACB;PDE3B;MKNK2;PIK3R1;PIK3CD;FOXO1;PYGL;HKDC1;RPS6;ARAF;MAPK1;AKT3;ACACB;PYGM;PRKAA1;INPP5K;FLOT2;PPARGC1A;PRKAR2A
Relaxin signaling pathway	23/130	0.0949263	0.239074	ARRB2;GNA15;ARRB1;TGFB1;ADCY9;GNAO1;PRKACB;PIK3R1;GNG11;PIK3CD;GNG2;RELA;GNB2;MMP9;GNB5;MAPK1;AKT3;TGFBR1;TGFBR2;PRKCA;VEGFB;PLCB1;SMAD2
cAMP signaling pathway	35/212	0.106445	0.263209	TIAM1;CAMK2G;ARAP3;ADCY9;NFATC1;HCAR3;PDE4D;GABBR1;PDE4A;ORAI1;PRKACB;PDE3B;PLD2;VAV2;CAMK4;PIK3R1;PIK3CD;GHRL;PPARA;PPP1R12A;RELA;PTCH1;ATP2B1;PLD1;MAPK1;AKT3;MYL9;HCAR2;CREBBP;ATP1A3;VIPR2;ATP2B4;ADRB2;ATP1A4;PTGER2
ECM-receptor interaction	15/82	0.125779	0.305463	VWF;ITGB5;ITGA6;SV2A;COL6A1;CD47;GP5;LAMB2;TNXB;ITGA5;CD44;TNR;ITGA2B;THBS1;COL6A2
Neomycin, kanamycin and gentamicin biosynthesis	2/5	0.135219	0.317064	HKDC1;HK1
Prolactin signaling pathway	13/70	0.134675	0.317064	SOCS5;PIK3R1;RELA;PIK3CD;SOCS7;TNFSF11;STAT5A;FOXO3;ESR2;MAPK1;GALT;AKT3;PRLR
Aldosterone synthesis and secretion	17/98	0.154374	0.355846	CAMK4;ATP1A3;CAMK1D;ATP2B4;CACNA1I;CAMK2G;NR4A2;ADCY9;ATP1A4;GNAQ;PRKCB;PRKCA;ATP2B1;ORAI1;PRKACB;NR4A1;PLCB1
Glycerolipid metabolism	11/61	0.184145	0.417395	AGPAT4;DGKE;DGKA;DGKD;DGKG;ALDH2;PNPLA2;DGAT1;LPL;MBOAT2;DGKK
Adipocytokine signaling pathway	12/69	0.204156	0.455166	ACSL6;PRKCQ;RELA;ACACB;PRKAA1;IRS2;RXRA;PPARA;PPARGC1A;AKT3;TNFRSF1B;CPT1A
Glycosaminoglycan degradation	4/19	0.242364	0.531637	HGSNAT;IDUA;IDS;SGSH
GnRH signaling pathway	15/93	0.255021	0.550522	MAP3K3;HBEGF;MAP2K3;CAMK2G;MAPK7;ADCY9;PRKCB;GNAQ;PRKCA;PLD1;MAPK1;PRKACB;PLD2;MAP3K4;PLCB1
Ether lipid metabolism	8/47	0.286506	0.608826	GDPD3;PLA2G7;PAFAH2;TMEM86B;PLD1;PLD4;PLD2;LPCAT1
mTOR signaling pathway	23/152	0.291539	0.609989	EIF4B;INSR;WNT7A;PIK3R1;PIK3CD;PRKCB;FZD1;WNT10B;WNT2B;DDIT4;RPS6;LAMTOR1;ULK1;MAPK1;AKT3;LAMTOR4;RPS6KA2;PRKAA1;IGF1R;ULK2;PRKCA;WNT3;RPS6KA1
Renin secretion	11/69	0.311899	0.6427	PPP3CA;PTGER4;ADRB2;PPP3R1;GNAQ;PTGER2;PRKACB;ORAI1;PDE3B;PRKG2;PLCB1
Arachidonic acid metabolism	10/63	0.329431	0.668695	LTA4H;PTGS1;TBXAS1;EPHX2;AKR1C3;CBR3;CYP4F3;PTGDS;PTGES;PTGS2
Starch and sucrose metabolism	6/36	0.34718	0.69436	PYGM;AMY2B;HK1;PYGL;HKDC1;MGAM
Cortisol synthesis and secretion	10/65	0.366745	0.71233	PBX1;CACNA1I;PDE8A;ADCY9;GNAQ;ORAI1;PRKACB;NR4A1;PDE8B;PLCB1
Histidine metabolism	4/23	0.369365	0.71233	CARNS1;ALDH3B1;HAL;ALDH2
Pentose phosphate pathway	5/30	0.371878	0.71233	ALDOC;H6PD;TKT;PGLS;TKTL1
Lysine degradation	9/59	0.388671	0.734156	EZH1;COLGALT2;SETD1B;ALDH2;PRDM2;KMT2A;KMT2E;SETD7;COLGALT1
Mucin type O-glycan biosynthesis	5/31	0.399902	0.735973	GCNT4;ST6GALNAC1;ST3GAL1;GALNT10;GALNT12
PPAR signaling pathway	11/74	0.400456	0.735973	ACSL6;SLC27A1;RXRA;PPARA;LPL;PPARD;CYP27A1;SCD5;CPT1A;PLIN4;PLIN5
Hedgehog signaling pathway	7/47	0.440739	0.799206	ARRB2;BCL2;PTCH1;ARRB1;SMURF2;KIF3A;PRKACB
Fructose and mannose metabolism	5/33	0.455394	0.814916	ALDOC;PFKFB2;HK1;PFKFB3;HKDC1
Estrogen signaling pathway	19/137	0.466769	0.824423	ADCY9;GABBR1;GNAO1;PRKACB;RARA;HBEGF;PIK3R1;PIK3CD;GNAQ;KRT36;BCL2;MMP9;MAPK1;AKT3;ESR2;TGFA;KRT23;NCOA1;PLCB1
Ovarian steroidogenesis	7/49	0.486153	0.847652	CYP1B1;AKR1C3;IGF1R;ADCY9;INSR;PRKACB;PTGS2
Fatty acid elongation	4/27	0.495002	0.852156	PPT1;HACD4;THEM4;ELOVL5
D-Glutamine and D-glutamate metabolism	1/5	0.511567	0.869663	GLS2
Fatty acid biosynthesis	2/13	0.533916	0.887443	ACSL6;ACACB
Thyroid hormone synthesis	10/74	0.535076	0.887443	ATP1A3;SLC5A5;ADCY9;PRKCB;GNAQ;TPO;ATP1A4;PRKCA;PRKACB;PLCB1
Purine metabolism	17/129	0.56223	0.921244	PAPSS2;AK5;NT5E;AK1;AMPD2;ADCY9;PDE3B;ADPRM;NME4;PDE7B;PDE4D;FHIT;PDE4A;PDE7A;AK8;PDE8A;PDE8B
Galactose metabolism	4/31	0.608734	0.96265	GALT;HKDC1;MGAM;HK1
Insulin secretion	11/86	0.608649	0.96265	ATP1A3;CAMK2G;ADCY9;ATP1A4;GNAQ;PRKCB;PRKCA;VAMP2;RAB3A;PRKACB;PLCB1
beta-Alanine metabolism	4/31	0.608734	0.96265	CARNS1;MLYCD;ALDH3B1;ALDH2
Amino sugar and nucleotide sugar metabolism	6/48	0.632793	0.989194	CYB5R3;UXS1;CYB5R1;HK1;GALT;HKDC1
ABC transporters	5/45	0.735422	0.999999	ABCB1;ABCC3;ABCA2;ABCA3;ABCA5
Alanine, aspartate and glutamate metabolism	3/35	0.864075	0.999999	GLS2;NAT8L;RIMKLB
Arginine and proline metabolism	4/49	0.907566	0.999999	CARNS1;CKB;ALDH2;GAMT
Arginine biosynthesis	1/21	0.950743	0.999999	GLS2
Ascorbate and aldarate metabolism	1/27	0.979172	0.999999	ALDH2
Biosynthesis of unsaturated fatty acids	3/27	0.718466	0.999999	SCD5;HACD4;ELOVL5
Butanoate metabolism	1/28	0.981956	0.999999	ACSM3
Complement and coagulation cascades	9/79	0.743991	0.999999	VWF;C3;F13A1;THBD;CFD;C5AR1;PLAUR;ITGB2;SERPINB2
Cysteine and methionine metabolism	1/47	0.99882	0.999999	DNMT3A
Cytosolic DNA-sensing pathway	5/63	0.935689	0.999999	POLR2F;CCL4;RELA;CCL5;MAVS
Fatty acid degradation	4/44	0.856519	0.999999	ACSL6;ACADSB;CPT1A;ALDH2
Folate biosynthesis	2/26	0.879526	0.999999	AKR1C3;ALPL
Glutathione metabolism	5/56	0.884266	0.999999	GGT7;GPX4;ANPEP;GSTP1;GSTM3
Glycine, serine and threonine metabolism	4/40	0.79991	0.999999	SARDH;GNMT;AMT;GAMT
Glycolysis / Gluconeogenesis	7/68	0.819996	0.999999	ENO3;ALDOC;ALDH2;ALDH3B1;HK1;HKDC1;ENO2
Glycosylphosphatidylinositol (GPI)-anchor biosynthesis	1/25	0.97225	0.999999	PIGS
Glyoxylate and dicarboxylate metabolism	1/30	0.986458	0.999999	AMT
IL-17 signaling pathway	9/93	0.888307	0.999999	RELA;CEBPB;TRAF5;MAPK7;PTGS2;MMP9;CXCL8;MAPK1;JUND
Mannose type O-glycan biosynthesis	2/23	0.83186	0.999999	ST3GAL3;B3GAT1
Metabolism of xenobiotics by cytochrome P450	6/74	0.941714	0.999999	CYP1B1;CBR3;CYP2S1;ALDH3B1;GSTP1;GSTM3
N-Glycan biosynthesis	4/50	0.915589	0.999999	MGAT4A;MAN1B1;MAN1C1;MGAT5
NOD-like receptor signaling pathway	19/178	0.880295	0.999999	NLRP6;TRAF5;CCL5;MAVS;NLRP1;NLRP3;JAK1;TXNIP;BCL2;RELA;MAPK1;NLRP12;PSTPIP1;ANTXR2;BIRC3;P2RX7;GABARAPL1;CXCL8;PLCB1
Neuroactive ligand-receptor interaction	34/338	0.973126	0.999999	C3;NMUR1;ADRA2B;CALCRL;GABBR1;P2RY2;LTB4R;CYSLTR2;S1PR5;C5AR1;LPAR2;GPR35;CNR2;GHRL;TACR2;VIPR1;P2RY11;OPRL1;PTGIR;PRLR;PTGDR;GRM2;LPAR6;MC1R;THRA;NR3C1;VIPR2;UTS2;ADRB2;PTGER2;P2RX7;P2RY8;PTGER4;HTR7
Nicotinate and nicotinamide metabolism	1/30	0.986458	0.999999	NT5E
Nitrogen metabolism	1/17	0.912577	0.999999	CA5B
One carbon pool by folate	2/20	0.767777	0.999999	MTHFR;AMT
Oxidative phosphorylation	3/133	0.999999	0.999999	ATP6V0E2;NDUFA13;LHPP
Pantothenate and CoA biosynthesis	2/19	0.742093	0.999999	VNN2;VNN3
Pentose and glucuronate interconversions	2/34	0.952348	0.999999	CRYL1;KL
Phenylalanine metabolism	1/17	0.912577	0.999999	ALDH3B1
Primary bile acid biosynthesis	2/17	0.683403	0.999999	CYP27A1;CYP46A1
Progesterone-mediated oocyte maturation	12/99	0.684691	0.999999	PIK3R1;RPS6KA2;PIK3CD;IGF1R;ADCY9;PDE3B;ARAF;MAPK1;AKT3;PRKACB;RPS6KA1;STK10
Propanoate metabolism	2/32	0.939646	0.999999	MLYCD;ACACB
Pyrimidine metabolism	6/57	0.790249	0.999999	CMPK1;TK2;NT5E;CDA;NME4;UPP1
Pyruvate metabolism	4/39	0.783213	0.999999	LDHD;ALDH2;ACACB;HAGH
RIG-I-like receptor signaling pathway	6/70	0.919468	0.999999	RELA;CYLD;MAVS;CXCL8;RNF125;TBKBP1
Renin-angiotensin system	2/23	0.83186	0.999999	MME;ANPEP
Retinol metabolism	5/67	0.95483	0.999999	CYP2S1;DGAT1;DHRS3;ALDH1A1;RDH5
Selenocompound metabolism	2/17	0.683403	0.999999	PSTK;PAPSS2
Steroid biosynthesis	2/19	0.742093	0.999999	CYP2R1;SOAT2
Steroid hormone biosynthesis	3/60	0.990426	0.999999	CYP1B1;STS;AKR1C3
Sulfur metabolism	1/9	0.724707	0.999999	PAPSS2
Taurine and hypotaurine metabolism	1/11	0.793333	0.999999	GGT7
Terpenoid backbone biosynthesis	1/22	0.957325	0.999999	PCYOX1
Thermogenesis	21/231	0.981979	0.999999	SLC25A29;ZNF516;MAP2K3;ADCY9;PNPLA2;PRKACB;CPT1A;NDUFA13;COX19;FGFR1;KDM3A;PRKG2;RPS6;SMARCA2;ARID1A;ACSL6;RPS6KA2;PRKAA1;PPARGC1A;SMARCD3;RPS6KA1
Toll-like receptor signaling pathway	12/104	0.748613	0.999999	CCL4;PIK3R1;RELA;MAP2K3;PIK3CD;CCL5;TLR8;CXCL8;MAPK1;CTSK;AKT3;TLR5
Tryptophan metabolism	2/42	0.981895	0.999999	CYP1B1;ALDH2
Tyrosine metabolism	3/36	0.876585	0.999999	ALDH3B1;TPO;HGD
Valine, leucine and isoleucine degradation	2/48	0.991402	0.999999	ACADSB;ALDH2

## Sheet: Sheet1
PPP2R5C;IRS2;FOXO3;INSR;SCD5;CPT1A;RAB14;PIK3R1;PPP2R2B;MLYCD;PIK3CD;FOXO1;PPP2R5A;ULK1;PFKFB3;AKT3;RAB11B;ACACB;PRKAA1;IGF1R;EEF2;PPARGC1A;PFKFB2;CRTC2
PPP2R5C;IRS2;FOXO3;INSR;SCD5;CPT1A;RAB14;PIK3R1;PPP2R2B;MLYCD;PIK3CD;FOXO1;PPP2R5A;ULK1;PFKFB3;AKT3;RAB11B;ACACB;PRKAA1;IGF1R;EEF2;PPARGC1A;PFKFB2;CRTC2
EIF4B	FGFR2	PPP2R5C	PIK3R5	FOXO3	INSR	ERBB2	CSF3R	COL6A1	LPAR2	FLT4	PIK3R1	ITGA6	GNG11	PPP2R2B	FGFR1	IL2RB	PIK3CD	AREG	RXRA	EREG	PPP2R5A	JAK1	FLT3LG	EFNA5	IL7R	PRLR	ANGPT1	KIT	OSM	VWF	ITGB5	DDIT4	PHLPP1	GNG2	FGF9	BCL2	EPOR	RPS6	RELA	GNB2	EFNA1	LPAR6	COL6A2	PDGFC	LAMB2	TNXB	ITGA5	GNB5	MAPK1
AKT3
ANGPT1
AREG
BCL2
CDKN1B
COL6A1
COL6A2
CRTC2
CSF1R
CSF3R
DDIT4
EFNA1
EFNA5
EIF4B
EPOR
ERBB2
EREG
FGF9
FGFR1
FGFR2
FLT3LG
FLT4
FOXO3
GNB2
GNB5
GNG11
GNG2
IGF1R
IL2RB
IL4R
IL7R
INSR
ITGA2B
ITGA5
ITGA6
ITGB5
JAK1
KIT
LAMB2
LPAR2
LPAR6
MAPK1
NGFR
NR4A1
OSM
PDGFC
PDGFRB
PHLPP1
PHLPP2
PIK3CD
PIK3R1
PIK3R5
PPP2R2B
PPP2R5A
PPP2R5C
PRKAA1
PRKCA
PRLR
RELA
RPS6
RXRA
TGFA
THBS1
THEM4
TNR
TNXB
VEGFB
VWF
[truncated: 18 more columns]
